# Supplementary material for: Chromatin interaction maps identify oncogenic targets of enhancer duplications in cancer
Source: HighWire-hosted journal article supplement (doi:10.1101/gr.278418.123), 2024-10-01
Supplement: Supplemental_Table_S1.xlsx [file Supplemental_Table_S1.xlsx]

## Sheet: Sheet 1
Table S1: Summary of PCAWG samples harboring focal duplications
Cancer types	Abbreviation in Figure 1a	Number of samples	Number of duplications per sample	Major cancer types	Number of duplication hotspots
Biliary-AdenoCA	CHOL	32	7.06	Biliary cancer	0
Breast-DCIS		2	57.0442	Breast cancer	114
Breast-LobularCA		11
Breast-AdenoCA	BRCA	168
ColoRect-AdenoCA	CRC	49	16.4082	Colorectal cancer	1
CNS-Oligo		13	7.68	Glioma	7
CNS-GBM	GBM	37
Cervix-AdenoCA		2
Uterus-AdenoCA	UCEC	38	70.9664	Gynecologic cancer	379
Ovary-AdenoCA	OV	109
Kidney-ChRCC		22	3.2	Kidney cancer	0
Kidney-RCC	KIRC	68
Liver-HCC	LIHC	289	15.9931	Liver cancer	136
Lung-AdenoCA	LUAD	33	14.91	Lung adenocarcinoma	0
Lymph-CLL		17	11.8889	Lymphoma	4
Lymph-BNHL	Lymph	73
CNS-Medullo	Medullo	76	3.84211	Medulloblastoma	7
Panc-AdenoCA	PAAD	223	12.9193	Pancreatic adenocarcinoma	27
Panc-Endocrine	PAEN	45	4.38	Pancreatic neuroendocrine tumor	0
Prost-AdenoCA	PRAD	146	9.82877	Prostate cancer	11
Bone-Cart		3	18.443	Sarcoma	12
Bone-Epith		8
SoftTissue-Leiomyo		15
SoftTissue-Liposarc		19
Bone-Osteosarc	SARC	34
Skin-Melanoma	SKCM	105	15.7333	Melanoma	8
Cervix-SCC		18	20.114	Squamous cancer	22
Lung-SCC	LUSC	47
Head-SCC	HNSC	49
Stomach-AdenoCA	STAD	63	47.443	Upper gastrointestinal cancer	153
Eso-AdenoCA	ESAD	86
Myeloid-AML		5
CNS-PiloAstro		8
Thy-AdenoCA		9
Bladder-TCC		22
