# Supplementary material for: Chromatin interaction maps identify oncogenic targets of enhancer duplications in cancer
Source: HighWire-hosted journal article supplement (doi:10.1101/gr.278418.123), 2024-10-01
Supplement: Supplemental_Table_S2.xlsx [file Supplemental_Table_S2.xlsx]

## Sheet: hotspot
Table S2a: The list of 881 duplication hotspots identified from PCAWG WGS data
Note: the occurrence is averaged based on the 5kb bins within each hotspot
duplication_chr	duplication_start	duplication_end	cancer_type	averaged_occurrence	adjust Pvalue
chr1	1180000	1200000	Breast	5	0.0292892
chr1	1215000	1460000	Breast	5.08163	0.0272942
chr1	66810000	66830000	Breast	5	0.0292892
chr1	66870000	66890000	Breast	5	0.0292892
chr1	155040000	155155000	Breast	5.21739	0.0239765
chr1	155900000	155970000	Breast	5	0.0292892
chr1	161015000	161025000	Breast	5	0.0292892
chr1	161045000	161065000	Breast	5	0.0292892
chr1	204400000	204410000	Breast	5	0.0292892
chr1	211915000	211920000	Breast	5	0.0292892
chr1	214715000	214750000	Breast	5.42857	0.0188155
chr1	226150000	226155000	Breast	5	0.0292892
chr1	234650000	234790000	Breast	5.21429	0.0240524
chr1	234815000	234835000	Breast	5	0.0292892
chr1	234990000	235055000	Breast	5	0.0292892
chr1	235120000	235300000	Breast	6.72222	0.00178364
chr2	38475000	38520000	Breast	5	0.0292892
chr2	43350000	43365000	Breast	5	0.0292892
chr2	43430000	43615000	Breast	5.2973	0.0220237
chr2	85680000	85735000	Breast	5	0.0292892
chr2	85770000	85865000	Breast	5.10526	0.0267167
chr2	134350000	134360000	Breast	5	0.0292892
chr2	134480000	134535000	Breast	5	0.0292892
chr2	136880000	137125000	Breast	6.04082	0.00632562
chr3	4735000	4805000	Breast	5	0.0292892
chr3	53100000	53120000	Breast	5	0.0292892
chr3	149055000	149290000	Breast	5.55319	0.0192069
chr3	149320000	149330000	Breast	5	0.0292892
chr3	172210000	172390000	Breast	6.86111	0.00553794
chr3	172430000	172440000	Breast	5	0.0292892
chr3	173985000	173990000	Breast	5	0.0292892
chr4	153935000	153940000	Breast	5	0.0292892
chr4	153970000	154005000	Breast	5	0.0292892
chr5	44655000	44720000	Breast	5	0.0292892
chr5	96200000	96205000	Breast	5	0.0292892
chr5	106585000	106595000	Breast	5	0.0292892
chr6	74030000	74040000	Breast	5	0.0292892
chr6	74065000	74310000	Breast	5.7551	0.0176611
chr6	74330000	74335000	Breast	5	0.0292892
chr6	118960000	118980000	Breast	5	0.0292892
chr6	119140000	119150000	Breast	5	0.0292892
chr6	119160000	119175000	Breast	5	0.0292892
chr6	119190000	119340000	Breast	5	0.0292892
chr6	151905000	151995000	Breast	5	0.0292892
chr7	26215000	26225000	Breast	5.5	0.0170699
chr7	68965000	69180000	Breast	5.37209	0.0201958
chr7	69210000	69215000	Breast	5	0.0292892
chr7	104530000	104535000	Breast	5	0.0292892
chr7	105125000	105180000	Breast	5	0.0292892
chr8	30480000	30705000	Breast	5	0.0292892
chr8	102385000	102450000	Breast	5	0.0292892
chr8	117285000	117355000	Breast	5.28571	0.0223067
chr8	117525000	117550000	Breast	5.4	0.0195138
chr8	128145000	128850000	Breast	10.3901	0.00112418
chr8	129115000	129130000	Breast	5	0.0292892
chr8	142020000	142045000	Breast	5	0.0292892
chr10	5580000	5615000	Breast	5	0.0292892
chr10	5670000	5735000	Breast	5	0.0292892
chr10	5785000	5805000	Breast	5	0.0292892
chr10	5830000	5835000	Breast	5	0.0292892
chr10	9050000	9230000	Breast	5.05556	0.0279315
chr10	37395000	37505000	Breast	5.27273	0.0226241
chr11	34460000	34945000	Breast	6.23711	0.00810359
chr11	61245000	61430000	Breast	5.13514	0.0259867
chr11	65270000	65290000	Breast	5	0.0292892
chr11	69395000	69400000	Breast	5	0.0292892
chr11	69525000	69540000	Breast	5	0.0292892
chr11	69580000	69600000	Breast	5	0.0292892
chr11	72895000	72925000	Breast	5	0.0292892
chr11	77705000	77725000	Breast	5	0.0292892
chr11	77890000	77960000	Breast	5.14286	0.025798
chr11	77975000	78025000	Breast	5	0.0292892
chr11	85700000	85720000	Breast	5.25	0.0231796
chr11	102280000	102395000	Breast	5.27273	0.0226241
chr12	11995000	12005000	Breast	5.5	0.0170699
chr12	12020000	12210000	Breast	6	0.00910157
chr12	14940000	15170000	Breast	5.36957	0.0202576
chr12	69080000	69280000	Breast	5.275	0.0225686
chr12	99115000	99150000	Breast	5	0.0292892
chr12	99415000	99420000	Breast	5	0.0292892
chr14	35820000	35895000	Breast	5.66667	0.0129968
chr14	37690000	38155000	Breast	6.86022	0.0100408
chr14	50305000	50415000	Breast	6.13636	0.00719296
chr14	68755000	68825000	Breast	5	0.0292892
chr14	68840000	68880000	Breast	5.125	0.0262344
chr14	68890000	68895000	Breast	5	0.0292892
chr14	100590000	100655000	Breast	5	0.0292892
chr14	105160000	105210000	Breast	5	0.0292892
chr14	105280000	105300000	Breast	5	0.0292892
chr15	64090000	64155000	Breast	5	0.0292892
chr16	2385000	2405000	Breast	5	0.0292892
chr16	11900000	11920000	Breast	5	0.0292892
chr16	85660000	85690000	Breast	5.16667	0.0252161
chr17	27135000	27160000	Breast	5	0.0292892
chr17	27430000	27540000	Breast	5	0.0292892
chr17	37435000	38350000	Breast	7.16393	0.00508023
chr17	38465000	38490000	Breast	5	0.0292892
chr17	56070000	56080000	Breast	5	0.0292892
chr17	57855000	58625000	Breast	6.11688	0.016541
chr17	58695000	58705000	Breast	5	0.0292892
chr17	79960000	80050000	Breast	5.5	0.0193135
chr17	80195000	80200000	Breast	5	0.0292892
chr20	15930000	15950000	Breast	5	0.0292892
chr20	30570000	30580000	Breast	5	0.0292892
chr20	30640000	30655000	Breast	5	0.0292892
chr20	30700000	30715000	Breast	5	0.0292892
chr20	32250000	32350000	Breast	5	0.0292892
chr20	48930000	48970000	Breast	5	0.0292892
chr19	12910000	12925000	Breast	5	0.0292892
chr19	12960000	13275000	Breast	5.74603	0.0145828
chr19	17315000	17350000	Breast	5	0.0292892
chr19	17395000	17455000	Breast	5.25	0.0231796
chr22	38435000	38445000	Breast	5	0.0292892
chr21	36160000	36240000	Breast	5.26667	0.0227722
chr11	2125000	2290000	CRC	7.48485	0.000505375
chr1	204415000	204845000	Glioma	3.48837	0.00454584
chr4	54715000	55480000	Glioma	3.9281	0.00164475
chr7	54665000	55735000	Glioma	9.91589	0.000578685
chr11	35810000	35965000	Glioma	3	0.00875224
chr12	57510000	57535000	Glioma	3	0.00875224
chr12	57655000	59560000	Glioma	4.94488	0.00353056
chr14	77180000	77525000	Glioma	3.6087	0.00350948
chr1	1015000	1075000	Gynecologic	5.18182	0.027579
chr1	1100000	1395000	Gynecologic	6.23729	0.00957364
chr1	6655000	6720000	Gynecologic	5	0.0323143
chr1	8100000	8145000	Gynecologic	5	0.0323143
chr1	8230000	8275000	Gynecologic	5	0.0323143
chr1	8400000	8430000	Gynecologic	5.5	0.0192922
chr1	10695000	11310000	Gynecologic	8.5122	0.00204474
chr1	11405000	11420000	Gynecologic	5	0.0323143
chr1	22075000	22140000	Gynecologic	5	0.0323143
chr1	22150000	22400000	Gynecologic	5.56	0.0202163
chr1	28960000	28970000	Gynecologic	5	0.0323143
chr1	31450000	31465000	Gynecologic	5	0.0323143
chr1	31490000	31585000	Gynecologic	5	0.0323143
chr1	33290000	33295000	Gynecologic	5	0.0323143
chr1	36480000	36725000	Gynecologic	6.18367	0.0122796
chr1	36865000	36980000	Gynecologic	5	0.0323143
chr1	39455000	39635000	Gynecologic	5.75	0.0127812
chr1	43630000	43745000	Gynecologic	5.17391	0.0277849
chr1	43850000	44130000	Gynecologic	5.17857	0.0276635
chr1	55045000	55120000	Gynecologic	5.26667	0.0253692
chr1	94610000	94620000	Gynecologic	5	0.0323143
chr1	110345000	110525000	Gynecologic	5.25	0.0258032
chr1	117770000	117845000	Gynecologic	5.46667	0.0201604
chr1	150580000	150615000	Gynecologic	5	0.0323143
chr1	151265000	151395000	Gynecologic	5.76923	0.0154685
chr1	151425000	151440000	Gynecologic	5	0.0323143
chr1	151520000	151695000	Gynecologic	5.51429	0.0230648
chr1	153480000	153535000	Gynecologic	5	0.0323143
chr1	153595000	153615000	Gynecologic	5	0.0323143
chr1	153625000	153815000	Gynecologic	6.05263	0.0136249
chr1	153835000	153845000	Gynecologic	5	0.0323143
chr1	153865000	153880000	Gynecologic	5	0.0323143
chr1	154910000	154925000	Gynecologic	5	0.0323143
chr1	154960000	155375000	Gynecologic	7.40964	0.00391405
chr1	155700000	156260000	Gynecologic	7.67857	0.0052788
chr1	172445000	172455000	Gynecologic	5	0.0323143
chr1	180450000	180655000	Gynecologic	7.26829	0.00468339
chr1	183010000	183020000	Gynecologic	5	0.0323143
chr1	183090000	183100000	Gynecologic	5	0.0323143
chr1	201910000	201915000	Gynecologic	5	0.0323143
chr1	201940000	202030000	Gynecologic	5.38889	0.022186
chr1	204975000	204995000	Gynecologic	5.5	0.0192922
chr1	205240000	205275000	Gynecologic	5	0.0323143
chr1	224225000	224235000	Gynecologic	5	0.0323143
chr1	225600000	225710000	Gynecologic	5	0.0323143
chr1	225730000	225740000	Gynecologic	5	0.0323143
chr1	225835000	225895000	Gynecologic	5	0.0323143
chr1	229285000	229370000	Gynecologic	5.41176	0.0215902
chr1	245000000	245010000	Gynecologic	5	0.0323143
chr2	20330000	20410000	Gynecologic	5	0.0323143
chr2	27765000	27795000	Gynecologic	5	0.0323143
chr2	27940000	27965000	Gynecologic	5.6	0.0166878
chr2	28560000	29070000	Gynecologic	8.52941	0.00447096
chr2	39295000	39310000	Gynecologic	5	0.0323143
chr2	43045000	43460000	Gynecologic	8.96386	0.00433607
chr2	43545000	43600000	Gynecologic	5	0.0323143
chr2	43620000	43625000	Gynecologic	5	0.0323143
chr2	43665000	43690000	Gynecologic	5	0.0323143
chr2	67935000	68280000	Gynecologic	6.62319	0.00461209
chr2	68380000	68395000	Gynecologic	5	0.0323143
chr2	68405000	68410000	Gynecologic	5	0.0323143
chr2	70505000	70510000	Gynecologic	5	0.0323143
chr2	74355000	74420000	Gynecologic	5.15385	0.0283075
chr2	85640000	85660000	Gynecologic	5	0.0323143
chr2	85690000	85745000	Gynecologic	5	0.0323143
chr2	113910000	113915000	Gynecologic	5	0.0323143
chr2	113960000	114160000	Gynecologic	5.225	0.0264543
chr2	114535000	114550000	Gynecologic	5	0.0323143
chr2	159645000	159690000	Gynecologic	5	0.0323143
chr2	159705000	159755000	Gynecologic	5	0.0323143
chr2	201825000	201900000	Gynecologic	5.46667	0.0201604
chr2	202060000	202080000	Gynecologic	5	0.0323143
chr2	219120000	219310000	Gynecologic	5.81579	0.0116131
chr2	220100000	220125000	Gynecologic	5	0.0323143
chr2	220140000	220240000	Gynecologic	5	0.0323143
chr3	8745000	8780000	Gynecologic	5	0.0323143
chr3	9385000	9415000	Gynecologic	5	0.0323143
chr3	9535000	9565000	Gynecologic	5	0.0323143
chr3	13690000	13735000	Gynecologic	6.11111	0.0079815
chr3	13760000	13915000	Gynecologic	5.54839	0.019369
chr3	47470000	47490000	Gynecologic	5	0.0323143
chr3	47525000	47705000	Gynecologic	6.27778	0.0132756
chr3	47810000	48495000	Gynecologic	7.39416	0.00528466
chr3	49400000	49630000	Gynecologic	5.95652	0.0137095
chr3	49645000	49655000	Gynecologic	5	0.0323143
chr3	49675000	49700000	Gynecologic	5	0.0323143
chr3	49865000	50025000	Gynecologic	5.65625	0.0152228
chr3	50090000	50675000	Gynecologic	7.74359	0.00413513
chr3	52190000	52385000	Gynecologic	5.97436	0.0106575
chr3	52420000	52600000	Gynecologic	5.19444	0.0272501
chr3	66700000	66720000	Gynecologic	5	0.0323143
chr3	66770000	66780000	Gynecologic	5	0.0323143
chr3	66815000	66975000	Gynecologic	5.90625	0.0106546
chr3	75200000	75270000	Gynecologic	5	0.0323143
chr3	107635000	107735000	Gynecologic	5.85	0.0101768
chr3	107850000	107855000	Gynecologic	5	0.0323143
chr3	112135000	112300000	Gynecologic	5.81818	0.0110055
chr3	115505000	115585000	Gynecologic	5	0.0323143
chr3	128980000	129090000	Gynecologic	5.63636	0.0157407
chr3	129130000	129155000	Gynecologic	5	0.0323143
chr3	168400000	168415000	Gynecologic	5	0.0323143
chr3	168515000	168925000	Gynecologic	9.4878	0.00455713
chr3	169020000	169035000	Gynecologic	5	0.0323143
chr3	169055000	169075000	Gynecologic	5	0.0323143
chr3	169165000	169210000	Gynecologic	5	0.0323143
chr3	169225000	169695000	Gynecologic	6.41935	0.0105702
chr3	169900000	169940000	Gynecologic	5.375	0.0225477
chr3	172125000	172510000	Gynecologic	5.85714	0.014566
chr3	175535000	175610000	Gynecologic	5	0.0323143
chr3	176980000	177150000	Gynecologic	5	0.0323143
chr3	177210000	177300000	Gynecologic	5.22222	0.0265267
chr3	179780000	179790000	Gynecologic	5	0.0323143
chr4	25450000	25525000	Gynecologic	5	0.0323143
chr4	90765000	90780000	Gynecologic	5	0.0323143
chr5	36475000	36505000	Gynecologic	5	0.0323143
chr5	36565000	36575000	Gynecologic	5	0.0323143
chr5	55590000	55930000	Gynecologic	5.45588	0.0213555
chr5	55965000	55970000	Gynecologic	5	0.0323143
chr5	59995000	60015000	Gynecologic	5	0.0323143
chr5	60480000	60495000	Gynecologic	5	0.0323143
chr5	60525000	60580000	Gynecologic	5	0.0323143
chr5	131460000	131560000	Gynecologic	5	0.0323143
chr5	133875000	133965000	Gynecologic	5	0.0323143
chr5	138900000	138915000	Gynecologic	5	0.0323143
chr5	138970000	139315000	Gynecologic	6.82609	0.00735906
chr5	148910000	149245000	Gynecologic	5.10448	0.0295932
chr5	149265000	149280000	Gynecologic	5	0.0323143
chr6	6640000	6750000	Gynecologic	5	0.0323143
chr6	6870000	6895000	Gynecologic	5	0.0323143
chr6	6930000	6950000	Gynecologic	5	0.0323143
chr6	7115000	7250000	Gynecologic	5	0.0323143
chr6	7340000	7370000	Gynecologic	5	0.0323143
chr6	7505000	7540000	Gynecologic	5	0.0323143
chr6	11465000	11525000	Gynecologic	5	0.0323143
chr6	18305000	18360000	Gynecologic	5	0.0323143
chr6	18390000	18525000	Gynecologic	6.74074	0.00923151
chr6	30695000	30730000	Gynecologic	5	0.0323143
chr6	31560000	31705000	Gynecologic	5.96552	0.0128849
chr6	31785000	31805000	Gynecologic	5	0.0323143
chr6	31875000	31900000	Gynecologic	5	0.0323143
chr6	33650000	33655000	Gynecologic	5	0.0323143
chr6	34170000	34520000	Gynecologic	5.62857	0.0159437
chr6	36575000	36580000	Gynecologic	5	0.0323143
chr6	38015000	38025000	Gynecologic	5	0.0323143
chr6	42065000	42105000	Gynecologic	5	0.0323143
chr6	42155000	42160000	Gynecologic	5	0.0323143
chr6	43680000	43685000	Gynecologic	5	0.0323143
chr6	76050000	76145000	Gynecologic	5	0.0323143
chr6	111765000	112205000	Gynecologic	6.125	0.0142457
chr6	126450000	126460000	Gynecologic	5	0.0323143
chr6	151815000	151840000	Gynecologic	5	0.0323143
chr6	151855000	151915000	Gynecologic	5	0.0323143
chr6	151925000	152140000	Gynecologic	6.81395	0.0118387
chr7	5525000	5570000	Gynecologic	5.44444	0.0207391
chr7	70195000	70205000	Gynecologic	5	0.0323143
chr7	73225000	73235000	Gynecologic	5	0.0323143
chr7	73625000	73635000	Gynecologic	5	0.0323143
chr7	73690000	74060000	Gynecologic	5.63514	0.0157727
chr7	99675000	99735000	Gynecologic	5	0.0323143
chr7	101925000	101950000	Gynecologic	5	0.0323143
chr7	129505000	129800000	Gynecologic	5.47458	0.0206568
chr7	129815000	129825000	Gynecologic	5	0.0323143
chr8	22060000	22065000	Gynecologic	5	0.0323143
chr8	42390000	42465000	Gynecologic	5	0.0323143
chr8	55105000	55190000	Gynecologic	5.52941	0.0221832
chr8	55245000	55400000	Gynecologic	5.16129	0.0281136
chr8	61890000	61940000	Gynecologic	5	0.0323143
chr8	61980000	61985000	Gynecologic	5	0.0323143
chr8	90785000	90865000	Gynecologic	6.25	0.00753028
chr8	102035000	102055000	Gynecologic	5	0.0323143
chr8	110525000	110530000	Gynecologic	5	0.0323143
chr8	120965000	121295000	Gynecologic	5.9697	0.0177329
chr8	129235000	129250000	Gynecologic	5	0.0323143
chr8	129460000	129645000	Gynecologic	7.59459	0.00327016
chr8	141960000	142290000	Gynecologic	6.30303	0.0102683
chr8	142300000	142365000	Gynecologic	5	0.0323143
chr8	144550000	144730000	Gynecologic	5.25	0.0258032
chr9	33225000	33235000	Gynecologic	5	0.0323143
chr9	34035000	34050000	Gynecologic	5	0.0323143
chr9	35750000	35775000	Gynecologic	5	0.0323143
chr9	130785000	130810000	Gynecologic	5	0.0323143
chr9	132250000	132415000	Gynecologic	5.9697	0.0127111
chr9	132895000	132900000	Gynecologic	5	0.0323143
chr9	139475000	139485000	Gynecologic	5	0.0323143
chr9	139635000	139690000	Gynecologic	5	0.0323143
chr9	139830000	139935000	Gynecologic	5.52381	0.0196589
chr10	30225000	30245000	Gynecologic	5.25	0.0258032
chr10	61560000	61630000	Gynecologic	5	0.0323143
chr10	61665000	61760000	Gynecologic	5	0.0323143
chr10	61790000	61815000	Gynecologic	5	0.0323143
chr10	61835000	61885000	Gynecologic	5.4	0.0218966
chr10	74025000	74105000	Gynecologic	5.125	0.0290588
chr10	75325000	75535000	Gynecologic	5.42857	0.0226327
chr10	75745000	75760000	Gynecologic	5	0.0323143
chr10	77140000	77150000	Gynecologic	5	0.0323143
chr10	79410000	79440000	Gynecologic	5	0.0323143
chr10	79465000	79770000	Gynecologic	6.13115	0.0125881
chr10	89660000	89700000	Gynecologic	5	0.0323143
chr10	95175000	95225000	Gynecologic	5	0.0323143
chr10	97040000	97075000	Gynecologic	5.42857	0.0211525
chr10	97200000	97255000	Gynecologic	5	0.0323143
chr10	97275000	97465000	Gynecologic	5.92105	0.0105077
chr11	730000	745000	Gynecologic	5	0.0323143
chr11	770000	870000	Gynecologic	5	0.0323143
chr11	13790000	13925000	Gynecologic	5	0.0323143
chr11	13960000	13980000	Gynecologic	5	0.0323143
chr11	34505000	34880000	Gynecologic	6.89333	0.0057581
chr11	46385000	46400000	Gynecologic	5	0.0323143
chr11	46755000	46805000	Gynecologic	5	0.0323143
chr11	46815000	46865000	Gynecologic	5	0.0323143
chr11	47380000	47540000	Gynecologic	5.15625	0.0282449
chr11	47655000	47660000	Gynecologic	5	0.0323143
chr11	47965000	48055000	Gynecologic	5	0.0323143
chr11	62575000	62620000	Gynecologic	5.44444	0.0207391
chr11	65115000	65565000	Gynecologic	8.95556	0.00126144
chr11	68195000	68210000	Gynecologic	5	0.0323143
chr11	71990000	72000000	Gynecologic	5	0.0323143
chr11	73140000	73530000	Gynecologic	5.11538	0.0293092
chr11	73545000	73550000	Gynecologic	5	0.0323143
chr11	73655000	73760000	Gynecologic	5.04762	0.0310741
chr11	74110000	74225000	Gynecologic	5	0.0323143
chr11	77715000	77785000	Gynecologic	5	0.0323143
chr11	77880000	77885000	Gynecologic	5	0.0323143
chr11	77930000	77940000	Gynecologic	5	0.0323143
chr11	77980000	77985000	Gynecologic	5	0.0323143
chr11	77995000	78005000	Gynecologic	5	0.0323143
chr11	78020000	78375000	Gynecologic	5.22535	0.0264452
chr11	102305000	102485000	Gynecologic	5.94444	0.0149998
chr11	118150000	118155000	Gynecologic	5	0.0323143
chr11	118310000	118325000	Gynecologic	5	0.0323143
chr11	118345000	118355000	Gynecologic	5	0.0323143
chr11	118405000	118510000	Gynecologic	5.09524	0.0298339
chr11	118530000	118600000	Gynecologic	5	0.0323143
chr11	121055000	121360000	Gynecologic	6.27869	0.00886391
chr12	1510000	1540000	Gynecologic	5	0.0323143
chr12	1665000	1815000	Gynecologic	5	0.0323143
chr12	6410000	6430000	Gynecologic	5	0.0323143
chr12	26970000	26980000	Gynecologic	5	0.0323143
chr12	27600000	27705000	Gynecologic	5	0.0323143
chr12	31995000	32000000	Gynecologic	5	0.0323143
chr12	46690000	46715000	Gynecologic	5	0.0323143
chr12	46730000	46795000	Gynecologic	5.38462	0.0222973
chr12	48150000	48280000	Gynecologic	5.96154	0.0151377
chr12	50770000	50795000	Gynecologic	5	0.0323143
chr12	52440000	52705000	Gynecologic	5.15094	0.0283831
chr12	53265000	53515000	Gynecologic	6.02	0.0138538
chr12	54455000	54470000	Gynecologic	5	0.0323143
chr12	54530000	54650000	Gynecologic	5.83333	0.0123378
chr12	54735000	54800000	Gynecologic	6.15385	0.0157085
chr12	56185000	56965000	Gynecologic	7.64744	0.0075284
chr12	57060000	57095000	Gynecologic	5	0.0323143
chr12	99075000	99190000	Gynecologic	5.65217	0.018032
chr12	100790000	100800000	Gynecologic	5	0.0323143
chr12	124855000	124885000	Gynecologic	5	0.0323143
chr12	125015000	125250000	Gynecologic	5.31915	0.0240023
chr13	44630000	44715000	Gynecologic	5	0.0323143
chr13	44805000	44825000	Gynecologic	5	0.0323143
chr13	73620000	73755000	Gynecologic	5.03846	0.0313126
chr14	23000000	23035000	Gynecologic	5	0.0323143
chr14	32945000	33380000	Gynecologic	5.90698	0.0125483
chr14	35720000	35940000	Gynecologic	5.47727	0.0198841
chr14	50245000	50495000	Gynecologic	5.72	0.0152204
chr14	51195000	51210000	Gynecologic	5	0.0323143
chr14	51300000	51310000	Gynecologic	5	0.0323143
chr14	68605000	68655000	Gynecologic	5	0.0323143
chr14	68745000	68800000	Gynecologic	5	0.0323143
chr14	68850000	68880000	Gynecologic	5	0.0323143
chr14	68905000	69070000	Gynecologic	5.39394	0.0233104
chr14	69080000	69105000	Gynecologic	5	0.0323143
chr14	69220000	69240000	Gynecologic	5	0.0323143
chr14	69250000	69275000	Gynecologic	5	0.0323143
chr14	77270000	77675000	Gynecologic	8.28395	0.00261546
chr15	40975000	40985000	Gynecologic	5	0.0323143
chr15	41150000	41170000	Gynecologic	5	0.0323143
chr15	43520000	43550000	Gynecologic	5	0.0323143
chr15	43625000	43640000	Gynecologic	5	0.0323143
chr15	71305000	71400000	Gynecologic	5.47368	0.0199776
chr15	71510000	71570000	Gynecologic	5.25	0.0258032
chr15	71645000	71670000	Gynecologic	5	0.0323143
chr15	71695000	71880000	Gynecologic	6.21622	0.0108421
chr15	71900000	71920000	Gynecologic	5	0.0323143
chr15	90635000	90655000	Gynecologic	5	0.0323143
chr15	93170000	93215000	Gynecologic	5	0.0323143
chr15	93235000	93385000	Gynecologic	5.4	0.0246597
chr16	285000	435000	Gynecologic	5.26667	0.0253692
chr16	585000	625000	Gynecologic	5	0.0323143
chr16	11660000	12080000	Gynecologic	6.03571	0.00985546
chr16	12180000	12195000	Gynecologic	5	0.0323143
chr16	56925000	57510000	Gynecologic	5.93103	0.0151887
chr16	57870000	57875000	Gynecologic	5	0.0323143
chr16	69435000	69455000	Gynecologic	5	0.0323143
chr16	89645000	89660000	Gynecologic	5.66667	0.0149515
chr17	1075000	1115000	Gynecologic	5	0.0323143
chr17	1130000	1160000	Gynecologic	5	0.0323143
chr17	1355000	1370000	Gynecologic	5	0.0323143
chr17	26760000	27450000	Gynecologic	6.89855	0.00916781
chr17	27475000	27495000	Gynecologic	5	0.0323143
chr17	29480000	29560000	Gynecologic	5.42857	0.0226327
chr17	29665000	29685000	Gynecologic	5	0.0323143
chr17	30630000	30650000	Gynecologic	5	0.0323143
chr17	30695000	30725000	Gynecologic	5	0.0323143
chr17	37670000	38130000	Gynecologic	8.20652	0.00347253
chr17	38140000	38155000	Gynecologic	5	0.0323143
chr17	42180000	42320000	Gynecologic	5.07143	0.030454
chr17	45990000	46870000	Gynecologic	8.9375	0.00427488
chr17	48880000	48915000	Gynecologic	5.28571	0.0248731
chr17	73015000	73050000	Gynecologic	5.42857	0.0211525
chr17	73110000	73195000	Gynecologic	5.11765	0.0292503
chr17	73470000	73905000	Gynecologic	7.24138	0.0054118
chr17	74535000	74570000	Gynecologic	5.14286	0.0285937
chr17	76195000	76215000	Gynecologic	5	0.0323143
chr17	79415000	79520000	Gynecologic	5	0.0323143
chr17	79580000	79835000	Gynecologic	6.45098	0.00892299
chr17	79855000	79875000	Gynecologic	5	0.0323143
chr20	3135000	3210000	Gynecologic	5	0.0323143
chr20	14920000	15070000	Gynecologic	5.06667	0.030578
chr20	15370000	15405000	Gynecologic	5	0.0323143
chr20	30135000	30390000	Gynecologic	6.72549	0.0084766
chr20	30400000	30405000	Gynecologic	5	0.0323143
chr20	30540000	30550000	Gynecologic	5	0.0323143
chr20	30585000	30695000	Gynecologic	5.18182	0.027579
chr20	30770000	30780000	Gynecologic	5	0.0323143
chr20	30835000	30850000	Gynecologic	5	0.0323143
chr20	30860000	30905000	Gynecologic	5	0.0323143
chr20	30930000	31185000	Gynecologic	5.31373	0.0241436
chr20	32305000	32320000	Gynecologic	5	0.0323143
chr20	32380000	32405000	Gynecologic	5	0.0323143
chr20	32425000	32490000	Gynecologic	5.30769	0.0258948
chr20	32645000	32650000	Gynecologic	5	0.0323143
chr20	32660000	32675000	Gynecologic	5	0.0323143
chr20	32685000	32710000	Gynecologic	5	0.0323143
chr20	32875000	32950000	Gynecologic	5.8	0.011479
chr20	34135000	34160000	Gynecologic	5	0.0323143
chr20	34250000	34320000	Gynecologic	5.38462	0.0222973
chr20	34335000	34385000	Gynecologic	5	0.0323143
chr20	34415000	34585000	Gynecologic	5	0.0323143
chr20	34695000	34755000	Gynecologic	5	0.0323143
chr20	35235000	35280000	Gynecologic	5	0.0323143
chr20	35305000	35600000	Gynecologic	5.72881	0.0164941
chr20	45990000	46015000	Gynecologic	5	0.0323143
chr20	48200000	48205000	Gynecologic	5	0.0323143
chr20	49140000	49190000	Gynecologic	5	0.0323143
chr20	49335000	49345000	Gynecologic	5	0.0323143
chr20	52265000	52420000	Gynecologic	5.03226	0.0314741
chr20	52435000	52445000	Gynecologic	5	0.0323143
chr20	60725000	60730000	Gynecologic	5	0.0323143
chr20	60860000	61005000	Gynecologic	6.13793	0.00910917
chr19	1160000	1215000	Gynecologic	5	0.0323143
chr19	9020000	9325000	Gynecologic	7.40984	0.00675903
chr19	10655000	11170000	Gynecologic	6.45631	0.0111921
chr19	13780000	14140000	Gynecologic	5.94444	0.0143369
chr19	14175000	14190000	Gynecologic	5	0.0323143
chr19	14220000	14250000	Gynecologic	5	0.0323143
chr19	14610000	14685000	Gynecologic	5.06667	0.030578
chr19	14695000	14700000	Gynecologic	5	0.0323143
chr19	18680000	18740000	Gynecologic	5	0.0323143
chr19	18810000	19305000	Gynecologic	6.0303	0.0134353
chr19	30245000	30290000	Gynecologic	5	0.0323143
chr19	33795000	33810000	Gynecologic	5	0.0323143
chr19	45195000	45255000	Gynecologic	5	0.0323143
chr19	50100000	50130000	Gynecologic	5.66667	0.0149515
chr19	50195000	50240000	Gynecologic	5	0.0323143
chr19	50260000	50270000	Gynecologic	5	0.0323143
chr22	29645000	29790000	Gynecologic	5.51724	0.0188432
chr22	30420000	30440000	Gynecologic	5	0.0323143
chr22	30520000	30530000	Gynecologic	5	0.0323143
chr22	32150000	32160000	Gynecologic	5	0.0323143
chr22	38285000	38310000	Gynecologic	5	0.0323143
chr22	38340000	38925000	Gynecologic	6.7094	0.00701159
chr22	41360000	41445000	Gynecologic	5.05882	0.0307823
chr22	41490000	41570000	Gynecologic	5.875	0.0134112
chr22	42765000	42815000	Gynecologic	5	0.0323143
chr22	46405000	46465000	Gynecologic	5	0.0323143
chr22	46485000	46515000	Gynecologic	5	0.0323143
chr22	46590000	46600000	Gynecologic	5	0.0323143
chr22	46950000	47010000	Gynecologic	6.5	0.00533656
chr22	47095000	47145000	Gynecologic	5	0.0323143
chr21	34110000	34125000	Gynecologic	5	0.0323143
chr21	44435000	44575000	Gynecologic	5	0.0323143
chr1	40370000	40400000	LIHC	4	0.0432779
chr1	65925000	65970000	LIHC	4	0.0432779
chr1	67990000	68085000	LIHC	4.15789	0.0372414
chr1	94780000	94870000	LIHC	5.05556	0.0104104
chr1	150390000	150585000	LIHC	4.07692	0.040337
chr1	154710000	155290000	LIHC	5.05172	0.0188071
chr1	156105000	156110000	LIHC	4	0.0432779
chr1	204280000	204325000	LIHC	4	0.0432779
chr1	204335000	204370000	LIHC	4	0.0432779
chr1	204385000	204575000	LIHC	4.76316	0.0141017
chr1	214215000	214230000	LIHC	4	0.0432779
chr1	225845000	225905000	LIHC	4	0.0432779
chr1	234570000	234695000	LIHC	4.04	0.0417486
chr1	234770000	234780000	LIHC	4	0.0432779
chr2	20370000	20380000	LIHC	4	0.0432779
chr2	20585000	20690000	LIHC	4.57143	0.0246405
chr2	43950000	43975000	LIHC	4	0.0432779
chr2	62720000	62725000	LIHC	4	0.0432779
chr2	63890000	64140000	LIHC	4.38	0.0287501
chr2	70325000	70380000	LIHC	4	0.0432779
chr2	178135000	178150000	LIHC	4	0.0432779
chr2	201580000	201585000	LIHC	4	0.0432779
chr2	208540000	208790000	LIHC	5.48	0.0125222
chr2	208850000	208945000	LIHC	4	0.0432779
chr2	211410000	211440000	LIHC	4	0.0432779
chr3	13305000	13335000	LIHC	4	0.0432779
chr3	50185000	50200000	LIHC	4	0.0432779
chr3	148945000	149060000	LIHC	4.47826	0.0293883
chr3	170665000	170785000	LIHC	4.125	0.038499
chr3	172220000	172355000	LIHC	4.88889	0.019278
chr3	197300000	197305000	LIHC	4	0.0432779
chr4	40365000	40425000	LIHC	4.5	0.0241624
chr4	69550000	69615000	LIHC	4	0.0432779
chr4	69750000	69765000	LIHC	4	0.0432779
chr4	74200000	74230000	LIHC	4	0.0432779
chr4	74260000	74445000	LIHC	7.62162	0.00981144
chr4	100085000	100150000	LIHC	4.23077	0.0344553
chr4	155510000	155530000	LIHC	4	0.0432779
chr4	155540000	155555000	LIHC	4	0.0432779
chr5	90160000	90175000	LIHC	4	0.0432779
chr5	133755000	133820000	LIHC	5.07692	0.0176567
chr5	139975000	139985000	LIHC	4	0.0432779
chr5	172095000	172165000	LIHC	4.64286	0.0235141
chr5	173065000	173140000	LIHC	4.4	0.0279855
chr5	176510000	176680000	LIHC	4	0.0432779
chr5	176820000	176835000	LIHC	4	0.0432779
chr6	30685000	30770000	LIHC	4	0.0432779
chr6	31805000	31855000	LIHC	4.2	0.0356317
chr6	35630000	35725000	LIHC	4	0.0432779
chr6	37645000	37655000	LIHC	4	0.0432779
chr6	37690000	37705000	LIHC	4	0.0432779
chr6	37740000	37765000	LIHC	4	0.0432779
chr6	43675000	43965000	LIHC	7.62069	0.00356414
chr6	44135000	44170000	LIHC	4.14286	0.0378163
chr7	44175000	44240000	LIHC	4.15385	0.0373962
chr7	44280000	44300000	LIHC	4	0.0432779
chr7	54960000	54970000	LIHC	4	0.0432779
chr7	99305000	99320000	LIHC	4	0.0432779
chr7	99340000	99350000	LIHC	4	0.0432779
chr7	99780000	99795000	LIHC	4	0.0432779
chr7	137700000	137740000	LIHC	4	0.0432779
chr8	26560000	26620000	LIHC	4	0.0432779
chr8	26630000	26670000	LIHC	4	0.0432779
chr8	42410000	42460000	LIHC	4	0.0432779
chr8	96080000	96135000	LIHC	4.18182	0.0363268
chr8	124310000	124330000	LIHC	4	0.0432779
chr8	126220000	126580000	LIHC	5.27778	0.0151529
chr9	19150000	19165000	LIHC	4	0.0432779
chr9	73090000	73110000	LIHC	4	0.0432779
chr9	116390000	116435000	LIHC	4	0.0432779
chr9	130930000	130995000	LIHC	4	0.0432779
chr9	137125000	137195000	LIHC	5.71429	0.0101856
chr9	139505000	139570000	LIHC	5.61538	0.00484619
chr9	139725000	139760000	LIHC	4	0.0432779
chr10	4970000	5200000	LIHC	4.73913	0.019415
chr10	5225000	5245000	LIHC	4	0.0432779
chr10	21790000	21800000	LIHC	4	0.0432779
chr10	95020000	95030000	LIHC	4	0.0432779
chr10	101620000	101625000	LIHC	4	0.0432779
chr10	113910000	114135000	LIHC	4.91111	0.012189
chr10	114755000	114780000	LIHC	4	0.0432779
chr10	114840000	114885000	LIHC	4	0.0432779
chr11	34410000	34425000	LIHC	4	0.0432779
chr11	34435000	34455000	LIHC	4.75	0.0146047
chr11	47605000	47630000	LIHC	4	0.0432779
chr11	57290000	57295000	LIHC	4	0.0432779
chr11	62615000	62635000	LIHC	4	0.0432779
chr11	63975000	64055000	LIHC	4	0.0432779
chr11	65245000	65255000	LIHC	4	0.0432779
chr11	65280000	65295000	LIHC	4	0.0432779
chr11	66300000	66385000	LIHC	4.17647	0.0365312
chr11	66400000	66435000	LIHC	4	0.0432779
chr11	66660000	66870000	LIHC	4.21429	0.0358877
chr11	68700000	68720000	LIHC	4	0.0432779
chr11	69040000	69860000	LIHC	6.15854	0.0112977
chr12	9260000	9300000	LIHC	4.125	0.038499
chr12	56280000	56685000	LIHC	4.53086	0.0238144
chr12	56705000	56865000	LIHC	4.65625	0.0192418
chr12	69130000	69270000	LIHC	5.46429	0.00775338
chr12	69470000	69475000	LIHC	4	0.0432779
chr12	100695000	100785000	LIHC	4.11111	0.03903
chr12	111000000	111105000	LIHC	4.52381	0.0232522
chr12	122275000	122325000	LIHC	4.1	0.0394548
chr13	100465000	100805000	LIHC	4.47059	0.0252869
chr14	24540000	24545000	LIHC	4	0.0432779
chr14	35815000	35880000	LIHC	4.69231	0.0223062
chr14	70200000	70330000	LIHC	4.15385	0.0373962
chr14	94895000	94905000	LIHC	4	0.0432779
chr15	41465000	41470000	LIHC	4	0.0432779
chr15	85410000	85430000	LIHC	4.75	0.0146047
chr15	89985000	90005000	LIHC	4.5	0.0241624
chr15	90685000	90700000	LIHC	4	0.0432779
chr16	4275000	4375000	LIHC	4	0.0432779
chr17	48750000	48790000	LIHC	4	0.0432779
chr17	48835000	48935000	LIHC	4.55	0.0222509
chr17	49220000	49225000	LIHC	4	0.0432779
chr17	58070000	58160000	LIHC	4	0.0432779
chr17	66575000	66700000	LIHC	4.2	0.0356317
chr17	66770000	66790000	LIHC	4.75	0.0146047
chr17	73605000	73625000	LIHC	4	0.0432779
chr17	73655000	73860000	LIHC	5.4878	0.013883
chr18	3060000	3065000	LIHC	4	0.0432779
chr18	29550000	29555000	LIHC	4	0.0432779
chr18	71895000	71905000	LIHC	4	0.0432779
chr20	385000	390000	LIHC	4	0.0432779
chr20	17800000	17810000	LIHC	4	0.0432779
chr20	32275000	32335000	LIHC	4	0.0432779
chr20	43055000	43110000	LIHC	5.36364	0.00339684
chr20	48780000	49190000	LIHC	5.71951	0.0121463
chr19	10220000	10245000	LIHC	4	0.0432779
chr19	10290000	10325000	LIHC	4	0.0432779
chr19	33545000	33570000	LIHC	4	0.0432779
chr19	33725000	33805000	LIHC	4.75	0.0146047
chr19	35610000	35625000	LIHC	4	0.0432779
chr19	50000000	50015000	LIHC	4	0.0432779
chr21	45250000	45255000	LIHC	4	0.0432779
chr2	89160000	89250000	Lymphoma	4.77778	0.00272807
chr7	110230000	110305000	Lymphoma	4	0.00481686
chr13	91855000	92115000	Lymphoma	4.07692	0.0044802
chr14	106210000	106215000	Lymphoma	4	0.00481686
chr2	15755000	16265000	Medullo	3.2451	0.00121205
chr5	87630000	88075000	Medullo	3	0.0015986
chr5	121650000	121880000	Medullo	3.97826	0.000360162
chr8	128235000	128245000	Medullo	3	0.0015986
chr8	128295000	128780000	Medullo	4.72165	7.02756e-05
chr9	20145000	20750000	Medullo	3	0.0015986
chr9	135480000	135745000	Medullo	3.66038	0.0005571
chr1	154900000	155165000	PAAD	4.77358	0.0114692
chr1	202120000	202135000	PAAD	4	0.022429
chr2	219230000	219235000	PAAD	4	0.022429
chr2	232470000	232515000	PAAD	4	0.022429
chr3	174495000	174520000	PAAD	4	0.022429
chr3	174615000	174620000	PAAD	4	0.022429
chr4	1760000	1820000	PAAD	4.41667	0.0143274
chr5	176745000	176840000	PAAD	4	0.022429
chr7	111135000	111165000	PAAD	4	0.022429
chr8	128135000	128440000	PAAD	5.29508	0.00515866
chr8	141565000	141665000	PAAD	4	0.022429
chr9	33215000	33260000	PAAD	4	0.022429
chr12	50325000	50385000	PAAD	4	0.022429
chr13	73615000	73705000	PAAD	4.44444	0.0137873
chr14	75670000	75685000	PAAD	4.66667	0.00946649
chr16	78030000	78070000	PAAD	4	0.022429
chr16	78135000	78145000	PAAD	4	0.022429
chr16	79150000	79160000	PAAD	4	0.022429
chr17	7260000	7505000	PAAD	4	0.022429
chr17	27130000	27205000	PAAD	4	0.022429
chr17	57925000	57955000	PAAD	4	0.022429
chr17	70605000	70665000	PAAD	4	0.022429
chr18	19665000	19795000	PAAD	4.11538	0.0201855
chr18	19810000	20055000	PAAD	4.10204	0.020445
chr18	20130000	20470000	PAAD	4.05882	0.0212853
chr19	42325000	42340000	PAAD	4	0.022429
chr22	30495000	30535000	PAAD	4	0.022429
chr2	206435000	207050000	PRAD	4.87805	0.00112672
chr3	175465000	175475000	PRAD	4	0.00721355
chr4	90780000	90950000	PRAD	4	0.00721355
chr5	58225000	58375000	PRAD	4.4	0.00444066
chrX	66085000	66270000	PRAD	5.08108	0.00189072
chr13	95045000	95190000	PRAD	4.72414	0.00265541
chr13	95375000	95485000	PRAD	4	0.00721355
chr14	37285000	37480000	PRAD	4.05128	0.00685805
chr14	37955000	38085000	PRAD	4.34615	0.00532896
chr14	106715000	106730000	PRAD	8	5.10755e-08
chr21	42835000	42845000	PRAD	4	0.00721355
chr6	44555000	44680000	Sarcoma	4.44	0.00356027
chr6	44690000	44930000	Sarcoma	4	0.00616817
chr6	122070000	122240000	Sarcoma	4	0.00616817
chr12	58145000	58190000	Sarcoma	4.55556	0.00287536
chr12	58200000	58210000	Sarcoma	4	0.00616817
chr12	58240000	58340000	Sarcoma	4	0.00616817
chr12	65240000	65300000	Sarcoma	4	0.00616817
chr12	65895000	65900000	Sarcoma	4	0.00616817
chr12	69160000	70065000	Sarcoma	7.0663	0.000418153
chr12	70210000	70530000	Sarcoma	4.53125	0.00301942
chr12	71840000	71895000	Sarcoma	4	0.00616817
chr12	71960000	72040000	Sarcoma	4	0.00616817
chr1	22395000	22400000	Melanoma	4	0.0200586
chr3	69960000	70100000	Melanoma	4.78571	0.0103298
chr4	55445000	55505000	Melanoma	4.08333	0.0184934
chr8	130480000	130705000	Melanoma	4.46667	0.0112935
chr15	38585000	38610000	Melanoma	4	0.0200586
chr15	38635000	38640000	Melanoma	4	0.0200586
chr22	38200000	38245000	Melanoma	4	0.0200586
chr22	38335000	38410000	Melanoma	4	0.0200586
chr1	174230000	174370000	Squamous	4.14286	0.00453163
chr1	209500000	209635000	Squamous	4.25926	0.00394893
chr2	141250000	141310000	Squamous	4	0.00524677
chr2	141355000	141400000	Squamous	4.11111	0.00469055
chr2	141465000	141480000	Squamous	4	0.00524677
chr3	181550000	181560000	Squamous	4	0.00524677
chr3	181580000	181710000	Squamous	4.30769	0.00370648
chr3	188925000	189110000	Squamous	4.97297	0.00192394
chr3	189515000	189565000	Squamous	4.1	0.00474617
chr3	189605000	189655000	Squamous	4	0.00524677
chr6	125410000	125435000	Squamous	4	0.00524677
chr7	17030000	17075000	Squamous	4	0.00524677
chr9	33345000	33355000	Squamous	4	0.00524677
chr11	65320000	65325000	Squamous	4	0.00524677
chr11	69940000	70030000	Squamous	4	0.00524677
chr11	70050000	70265000	Squamous	4.65116	0.00198708
chr11	70285000	70290000	Squamous	4	0.00524677
chr13	73640000	74130000	Squamous	7.30928	0.00111018
chr13	74210000	74265000	Squamous	4	0.00524677
chr16	15980000	16005000	Squamous	4	0.00524677
chr17	57915000	57955000	Squamous	4.125	0.00462102
chr17	79680000	79700000	Squamous	4	0.00524677
chr1	1225000	1390000	UGI	5.33333	0.0071384
chr1	10690000	11130000	UGI	6.55682	0.00278499
chr1	22050000	22440000	UGI	5.51282	0.00551924
chr1	22905000	23075000	UGI	5.64706	0.00750334
chr1	33135000	33370000	UGI	6.02128	0.00443552
chr1	36560000	36580000	UGI	5	0.0101454
chr1	94965000	94985000	UGI	5	0.0101454
chr1	95020000	95140000	UGI	5.125	0.00901779
chr1	154975000	155130000	UGI	6.19355	0.00201906
chr1	155310000	155325000	UGI	5	0.0101454
chr1	155975000	156105000	UGI	6.03846	0.0017007
chr1	156130000	156225000	UGI	5.47368	0.00587229
chr1	156345000	156475000	UGI	5.15385	0.00875756
chr1	156495000	156500000	UGI	5	0.0101454
chr1	168560000	168925000	UGI	7.16438	0.00135597
chr1	174175000	174195000	UGI	5	0.0101454
chr1	201970000	202085000	UGI	5.45455	0.0071361
chr1	207035000	207040000	UGI	5	0.0101454
chr1	207070000	207170000	UGI	5.4	0.006537
chr1	226130000	226190000	UGI	5	0.0101454
chr1	234690000	235435000	UGI	8.62416	0.00127104
chr2	8790000	8800000	UGI	5	0.0101454
chr2	20265000	20470000	UGI	6.07317	0.00226576
chr2	43095000	43500000	UGI	8.16049	0.000411838
chr2	85665000	85695000	UGI	5	0.0101454
chr2	85765000	85780000	UGI	5	0.0101454
chr2	85805000	85830000	UGI	5	0.0101454
chr2	103185000	103245000	UGI	5	0.0101454
chr2	173035000	173170000	UGI	5.85185	0.00542445
chr2	190300000	190545000	UGI	5.61224	0.00462233
chr2	190560000	190575000	UGI	5	0.0101454
chr2	190585000	190640000	UGI	5	0.0101454
chr2	208670000	208675000	UGI	5	0.0101454
chr2	219275000	219330000	UGI	5	0.0101454
chr2	219890000	219930000	UGI	5	0.0101454
chr3	14255000	14495000	UGI	6.04167	0.00345417
chr3	169005000	169035000	UGI	5	0.0101454
chr3	175145000	175160000	UGI	5	0.0101454
chr3	185930000	185970000	UGI	5	0.0101454
chr3	193470000	193500000	UGI	5	0.0101454
chr3	193630000	193670000	UGI	5	0.0101454
chr3	193720000	193730000	UGI	5	0.0101454
chr3	193830000	193885000	UGI	5	0.0101454
chr4	1750000	1760000	UGI	5	0.0101454
chr4	38135000	38165000	UGI	5.5	0.0056349
chr4	38175000	38200000	UGI	5	0.0101454
chr4	91065000	91085000	UGI	5.75	0.00337964
chr4	152285000	152290000	UGI	5	0.0101454
chr5	127135000	127310000	UGI	6.22857	0.00272038
chr5	148845000	148880000	UGI	5	0.0101454
chr6	41640000	41645000	UGI	5	0.0101454
chr6	43625000	43995000	UGI	7.5	0.00187864
chr6	107115000	107170000	UGI	5.81818	0.00276457
chr6	135555000	135595000	UGI	5	0.0101454
chr6	147845000	147865000	UGI	5	0.0101454
chr7	2650000	2745000	UGI	5.05263	0.00967062
chr7	16600000	17180000	UGI	8.58621	0.00116322
chr7	17230000	17250000	UGI	5	0.0101454
chr7	17335000	17355000	UGI	5	0.0101454
chr7	66195000	66205000	UGI	5	0.0101454
chr7	66245000	66330000	UGI	5	0.0101454
chr7	73530000	73540000	UGI	5	0.0101454
chr7	97970000	97990000	UGI	5	0.0101454
chr7	99590000	99625000	UGI	5	0.0101454
chrX	7330000	7345000	UGI	5	0.0101454
chr8	21940000	22050000	UGI	5	0.0101454
chr8	27430000	27515000	UGI	5.05882	0.00961477
chr8	101290000	101620000	UGI	5.74242	0.00369046
chr8	128135000	128770000	UGI	7.59055	0.00177817
chr9	33350000	33420000	UGI	5	0.0101454
chr9	36240000	36285000	UGI	5	0.0101454
chr9	130285000	130450000	UGI	6	0.0030642
chr9	130680000	130875000	UGI	5.69231	0.00431043
chr9	139505000	139650000	UGI	5.71429	0.00484493
chr9	139665000	139875000	UGI	5.85714	0.00457465
chr9	140270000	140280000	UGI	5	0.0101454
chr10	5490000	5690000	UGI	6.2	0.00292097
chr10	74385000	74405000	UGI	5	0.0101454
chr10	76995000	77235000	UGI	6.02083	0.00583836
chr10	80685000	80690000	UGI	5	0.0101454
chr10	105770000	105835000	UGI	5	0.0101454
chr11	740000	770000	UGI	5	0.0101454
chr11	785000	800000	UGI	5	0.0101454
chr11	2140000	2255000	UGI	6.78261	0.000674604
chr11	34540000	34885000	UGI	5.6087	0.00477032
chr11	46150000	46360000	UGI	6	0.00112438
chr11	65235000	65310000	UGI	5.4	0.00707045
chr11	65325000	65340000	UGI	5	0.0101454
chr11	67200000	67245000	UGI	5	0.0101454
chr11	74150000	74340000	UGI	7.05263	0.000974293
chr11	102355000	102390000	UGI	5	0.0101454
chr11	111165000	111170000	UGI	5	0.0101454
chr12	53620000	53680000	UGI	5	0.0101454
chr12	53800000	53835000	UGI	5	0.0101454
chr12	56375000	56615000	UGI	6.20833	0.0030085
chr12	56640000	56665000	UGI	5	0.0101454
chr12	117500000	117565000	UGI	5.69231	0.0045156
chr12	120680000	120720000	UGI	5	0.0101454
chr12	120745000	120775000	UGI	5	0.0101454
chr13	73605000	74160000	UGI	9.37838	0.000427015
chr14	65735000	65880000	UGI	6.24138	0.00170612
chr14	67865000	67870000	UGI	5	0.0101454
chr14	68705000	68780000	UGI	5	0.0101454
chr14	68965000	69125000	UGI	5.90323	0.00380424
chr14	69150000	69155000	UGI	5	0.0101454
chr14	75645000	75670000	UGI	5.8	0.00452894
chr14	103040000	103420000	UGI	5.03947	0.00978932
chr14	103495000	103515000	UGI	5	0.0101454
chr15	80915000	80930000	UGI	5	0.0101454
chr15	90370000	90385000	UGI	5	0.0101454
chr15	90415000	90455000	UGI	5	0.0101454
chr16	11810000	11935000	UGI	5.88	0.006946
chr16	12045000	12075000	UGI	5	0.0101454
chr16	77955000	78175000	UGI	5.25	0.00807201
chr16	78865000	78870000	UGI	5	0.0101454
chr16	79220000	79320000	UGI	5.95	0.00357588
chr17	4315000	4385000	UGI	5.07143	0.00950105
chr17	28635000	28750000	UGI	5.13043	0.00896876
chr17	30445000	30480000	UGI	5	0.0101454
chr17	37650000	39130000	UGI	8.69595	0.00189617
chr17	39590000	39660000	UGI	5.14286	0.0088567
chr17	39755000	39930000	UGI	5	0.0101454
chr17	39940000	39945000	UGI	5	0.0101454
chr17	40045000	40055000	UGI	5.5	0.0056349
chr17	46110000	46125000	UGI	5	0.0101454
chr17	48630000	49135000	UGI	6.57426	0.00387646
chr17	49145000	49160000	UGI	5	0.0101454
chr17	49185000	49190000	UGI	5	0.0101454
chr17	49200000	49205000	UGI	5	0.0101454
chr17	57930000	57940000	UGI	5	0.0101454
chr17	73030000	73075000	UGI	5.33333	0.0071384
chr18	19465000	19865000	UGI	7.725	0.000821741
chr18	55600000	55660000	UGI	5.09091	0.00932532
chr18	55680000	55695000	UGI	5	0.0101454
chr20	30765000	30930000	UGI	5.69697	0.00512628
chr20	30995000	31025000	UGI	5	0.0101454
chr20	48640000	49150000	UGI	6.83333	0.0010737
chr20	52240000	52355000	UGI	5	0.0101454
chr20	52395000	52560000	UGI	5.15152	0.00877859
chr20	52570000	52580000	UGI	5	0.0101454
chr20	60990000	61005000	UGI	5	0.0101454
chr19	10680000	10725000	UGI	5.11111	0.00914308
chr19	13925000	13995000	UGI	5	0.0101454
chr19	18470000	18495000	UGI	5	0.0101454
chr19	18505000	18515000	UGI	5	0.0101454
chr19	35585000	35630000	UGI	5	0.0101454
chr19	45015000	45070000	UGI	5	0.0101454
chr19	45080000	45090000	UGI	5	0.0101454
chr19	45145000	45265000	UGI	6.5	0.00388428
chr19	45435000	45525000	UGI	6.11111	0.00284051
chr22	38180000	38195000	UGI	5	0.0101454
chr21	34835000	34920000	UGI	5.05882	0.00961477
chr21	42785000	42795000	UGI	5	0.0101454

## Sheet: annotated_hotspot
Table S2b: The list of 179 RENC-annotated duplication hotspots.
Note: there are cases in which two genes share the same promoter
duplication_chr	duplication_start	duplication_end	cancer_type	gene	type
chr1	1180000	1200000	Breast	UBE2J2	Gene-harboring duplication hotspot with RENC gene found inside
chr1	1215000	1460000	Breast	PUSL1;ACAP3	Gene-harboring duplication hotspot with RENC gene found inside
chr1	155900000	155970000	Breast	ARHGEF2	Gene-harboring duplication hotspot with RENC gene found inside
chr1	161045000	161065000	Breast	NECTIN4	Non-gene duplication hotspot
chr1	204400000	204410000	Breast	PPP1R15B	Non-gene duplication hotspot
chr1	214715000	214750000	Breast	PTPN14	Non-gene duplication hotspot
chr1	234650000	234790000	Breast	IRF2BP2	Gene-harboring duplication hotspot with RENC gene found inside
chr1	234815000	234835000	Breast	IRF2BP2	Non-gene duplication hotspot
chr1	234990000	235055000	Breast	IRF2BP2	Non-gene duplication hotspot
chr1	235120000	235300000	Breast	IRF2BP2	Gene-harboring duplication hotspot with RENC gene found outside
chr2	38475000	38520000	Breast	CYP1B1	Non-gene duplication hotspot
chr2	43350000	43365000	Breast	ZFP36L2	Non-gene duplication hotspot
chr2	43430000	43615000	Breast	ZFP36L2	Gene-harboring duplication hotspot with RENC gene found inside
chr2	85680000	85735000	Breast	MAT2A	Non-gene duplication hotspot
chr2	136880000	137125000	Breast	DARS1	Non-gene duplication hotspot
chr3	4735000	4805000	Breast	BHLHE40	Non-gene duplication hotspot
chr3	149055000	149290000	Breast	TM4SF1	Gene-harboring duplication hotspot with RENC gene found inside
chr3	172210000	172390000	Breast	TNFSF10	Gene-harboring duplication hotspot with RENC gene found inside
chr6	74065000	74310000	Breast	EEF1A1	Gene-harboring duplication hotspot with RENC gene found inside
chr6	151905000	151995000	Breast	ESR1	Non-gene duplication hotspot
chr7	26215000	26225000	Breast	HNRNPA2B1;CBX3	Non-gene duplication hotspot
chr8	30480000	30705000	Breast	GSR	Gene-harboring duplication hotspot with RENC gene found inside
chr8	102385000	102450000	Breast	GRHL2	Non-gene duplication hotspot
chr8	117285000	117355000	Breast	TRPS1	Non-gene duplication hotspot
chr8	128145000	128850000	Breast	MYC	Gene-harboring duplication hotspot with RENC gene found inside
chr8	129115000	129130000	Breast	MYC	Non-gene duplication hotspot
chr10	5830000	5835000	Breast	GDI2	Non-gene duplication hotspot
chr10	9050000	9230000	Breast	GATA3	Non-gene duplication hotspot
chr11	61245000	61430000	Breast	SYT7	Gene-harboring duplication hotspot with RENC gene found inside
chr11	65270000	65290000	Breast	SLC25A45;FRMD8	Non-gene duplication hotspot
chr11	72895000	72925000	Breast	P2RY2	Non-gene duplication hotspot
chr11	77890000	77960000	Breast	NARS2	Gene-harboring duplication hotspot with RENC gene found outside
chr11	77975000	78025000	Breast	GAB2	Non-gene duplication hotspot
chr11	102280000	102395000	Breast	TMEM123	Non-gene duplication hotspot
chr12	12020000	12210000	Breast	ETV6	Non-gene duplication hotspot
chr12	69080000	69280000	Breast	MDM2	Gene-harboring duplication hotspot with RENC gene found inside
chr14	35820000	35895000	Breast	NFKBIA	Gene-harboring duplication hotspot with RENC gene found inside
chr14	37690000	38155000	Breast	TTC6;FOXA1	Gene-harboring duplication hotspot with RENC gene found inside
chr14	50305000	50415000	Breast	ARF6	Gene-harboring duplication hotspot with RENC gene found inside
chr14	68755000	68825000	Breast	ZFP36L1	Non-gene duplication hotspot
chr14	68840000	68880000	Breast	ZFP36L1	Non-gene duplication hotspot
chr14	105280000	105300000	Breast	ZBTB42	Non-gene duplication hotspot
chr15	64090000	64155000	Breast	HERC1	Non-gene duplication hotspot
chr16	11900000	11920000	Breast	ZC3H7A	Non-gene duplication hotspot
chr16	85660000	85690000	Breast	GSE1	Non-gene duplication hotspot
chr17	27430000	27540000	Breast	MYO18A	Non-gene duplication hotspot
chr17	37435000	38350000	Breast	MED1;CDK12	Gene-harboring duplication hotspot with RENC gene found inside
chr17	56070000	56080000	Breast	SRSF1	Non-gene duplication hotspot
chr17	57855000	58625000	Breast	TUBD1;RPS6KB1	Gene-harboring duplication hotspot with RENC gene found inside
chr17	58695000	58705000	Breast	PPM1D	Non-gene duplication hotspot
chr19	12960000	13275000	Breast	STX10;IER2	Gene-harboring duplication hotspot with RENC gene found inside
chr19	17315000	17350000	Breast	NR2F6	Gene-harboring duplication hotspot with RENC gene found outside
chr19	17395000	17455000	Breast	MRPL34;DDA1;ABHD8	Gene-harboring duplication hotspot with RENC gene found inside
chr20	32250000	32350000	Breast	ZNF341	Gene-harboring duplication hotspot with RENC gene found outside
chr20	48930000	48970000	Breast	CEBPB	Non-gene duplication hotspot
chr21	36160000	36240000	Breast	RUNX1	Non-gene duplication hotspot
chr2	206435000	207050000	PRAD	INO80D	Gene-harboring duplication hotspot with RENC gene found inside
chr14	37285000	37480000	PRAD	PAX9	Non-gene duplication hotspot
chr14	37955000	38085000	PRAD	TTC6;FOXA1	Gene-harboring duplication hotspot with RENC gene found inside
chrX	66085000	66270000	PRAD	AR	Non-gene duplication hotspot
chr3	69960000	70100000	Melanoma	MITF	Gene-harboring duplication hotspot with RENC gene found inside
chr8	130480000	130705000	Melanoma	MYC	Non-gene duplication hotspot
chr22	38200000	38245000	Melanoma	GCAT;H1-0	Gene-harboring duplication hotspot with RENC gene found inside
chr22	38335000	38410000	Melanoma	SOX10	Gene-harboring duplication hotspot with RENC gene found inside
chr1	209500000	209635000	Squamous	LAMB3	Non-gene duplication hotspot
chr3	181550000	181560000	Squamous	SOX2	Non-gene duplication hotspot
chr3	181580000	181710000	Squamous	SOX2	Non-gene duplication hotspot
chr3	188925000	189110000	Squamous	TP63	Gene-harboring duplication hotspot with RENC gene found outside
chr3	189515000	189565000	Squamous	TP63	Non-gene duplication hotspot
chr3	189605000	189655000	Squamous	TP63	Non-gene duplication hotspot
chr6	125410000	125435000	Squamous	RNF217	Non-gene duplication hotspot
chr11	65320000	65325000	Squamous	LTBP3	Non-gene duplication hotspot
chr13	73640000	74130000	Squamous	KLF5	Non-gene duplication hotspot
chr13	74210000	74265000	Squamous	KLF5	Non-gene duplication hotspot
chr17	57915000	57955000	Squamous	PTRH2;VMP1	Non-gene duplication hotspot
chr1	1225000	1390000	UGI	VWA1	Gene-harboring duplication hotspot with RENC gene found inside
chr1	10690000	11130000	UGI	CASZ1	Gene-harboring duplication hotspot with RENC gene found inside
chr1	22050000	22440000	UGI	HSPG2	Gene-harboring duplication hotspot with RENC gene found inside
chr1	22905000	23075000	UGI	HNRNPR	Gene-harboring duplication hotspot with RENC gene found outside
chr1	33135000	33370000	UGI	KIAA1522	Gene-harboring duplication hotspot with RENC gene found inside
chr1	36560000	36580000	UGI	STK40	Gene-harboring duplication hotspot with RENC gene found outside
chr1	95020000	95140000	UGI	F3	Non-gene duplication hotspot
chr1	154975000	155130000	UGI	ZBTB7B	Gene-harboring duplication hotspot with RENC gene found inside
chr1	155975000	156105000	UGI	LMNA	Gene-harboring duplication hotspot with RENC gene found inside
chr1	156130000	156225000	UGI	SLC25A44	Gene-harboring duplication hotspot with RENC gene found inside
chr1	156345000	156475000	UGI	MEF2D	Gene-harboring duplication hotspot with RENC gene found inside
chr1	168560000	168925000	UGI	ATP1B1	Gene-harboring duplication hotspot with RENC gene found outside
chr1	201970000	202085000	UGI	ELF3	Gene-harboring duplication hotspot with RENC gene found inside
chr1	207070000	207170000	UGI	PFKFB2;YOD1	Gene-harboring duplication hotspot with RENC gene found outside
chr1	226130000	226190000	UGI	EPHX1	Gene-harboring duplication hotspot with RENC gene found outside
chr1	234690000	235435000	UGI	IRF2BP2	Gene-harboring duplication hotspot with RENC gene found inside
chr2	20265000	20470000	UGI	SDC1	Gene-harboring duplication hotspot with RENC gene found inside
chr2	43095000	43500000	UGI	ZFP36L2	Gene-harboring duplication hotspot with RENC gene found inside
chr2	85665000	85695000	UGI	SH2D6	Non-gene duplication hotspot
chr2	85765000	85780000	UGI	SH2D6	Gene-harboring duplication hotspot with RENC gene found outside
chr2	85805000	85830000	UGI	RNF181	Gene-harboring duplication hotspot with RENC gene found inside
chr2	103185000	103245000	UGI	SLC9A4	Non-gene duplication hotspot
chr2	173035000	173170000	UGI	ITGA6	Non-gene duplication hotspot
chr2	190300000	190545000	UGI	SLC40A1	Gene-harboring duplication hotspot with RENC gene found inside
chr2	208670000	208675000	UGI	FZD5	Non-gene duplication hotspot
chr2	219275000	219330000	UGI	ARPC2	Gene-harboring duplication hotspot with RENC gene found outside
chr2	219890000	219930000	UGI	IHH	Gene-harboring duplication hotspot with RENC gene found inside
chr3	14255000	14495000	UGI	CCDC174	Gene-harboring duplication hotspot with RENC gene found outside
chr3	169005000	169035000	UGI	MECOM	Non-gene duplication hotspot
chr3	185930000	185970000	UGI	ETV5	Non-gene duplication hotspot
chr3	193470000	193500000	UGI	HES1	Non-gene duplication hotspot
chr3	193630000	193670000	UGI	HES1	Non-gene duplication hotspot
chr3	193720000	193730000	UGI	HES1	Non-gene duplication hotspot
chr3	193830000	193885000	UGI	HES1	Gene-harboring duplication hotspot with RENC gene found inside
chr4	38135000	38165000	UGI	KLF3	Non-gene duplication hotspot
chr4	38175000	38200000	UGI	KLF3	Non-gene duplication hotspot
chr5	127135000	127310000	UGI	SLC12A2	Non-gene duplication hotspot
chr5	148845000	148880000	UGI	CSNK1A1	Non-gene duplication hotspot
chr6	43625000	43995000	UGI	VEGFA	Gene-harboring duplication hotspot with RENC gene found inside
chr6	107115000	107170000	UGI	RTN4IP1;QRSL1	Non-gene duplication hotspot
chr7	2650000	2745000	UGI	TTYH3	Gene-harboring duplication hotspot with RENC gene found inside
chr7	16600000	17180000	UGI	BZW2;ANKMY2	Gene-harboring duplication hotspot with RENC gene found inside
chr7	17230000	17250000	UGI	AHR	Non-gene duplication hotspot
chr7	17335000	17355000	UGI	AHR	Non-gene duplication hotspot
chr7	66245000	66330000	UGI	SBDS;TYW1	Gene-harboring duplication hotspot with RENC gene found inside
chr7	97970000	97990000	UGI	BAIAP2L1	Non-gene duplication hotspot
chr7	99590000	99625000	UGI	ZKSCAN1	Non-gene duplication hotspot
chr8	21940000	22050000	UGI	NUDT18	Gene-harboring duplication hotspot with RENC gene found inside
chr8	101290000	101620000	UGI	RNF19A	Gene-harboring duplication hotspot with RENC gene found outside
chr8	128135000	128770000	UGI	POU5F1B	Gene-harboring duplication hotspot with RENC gene found inside
chr9	33350000	33420000	UGI	AQP3	Gene-harboring duplication hotspot with RENC gene found outside
chr9	36240000	36285000	UGI	RNF38	Non-gene duplication hotspot
chr9	130285000	130450000	UGI	NIBAN2	Gene-harboring duplication hotspot with RENC gene found outside
chr9	130680000	130875000	UGI	FAM102A	Gene-harboring duplication hotspot with RENC gene found inside
chr9	139505000	139650000	UGI	SEC16A;C9orf163	Gene-harboring duplication hotspot with RENC gene found inside
chr9	139665000	139875000	UGI	RABL6	Gene-harboring duplication hotspot with RENC gene found inside
chr10	5490000	5690000	UGI	NET1	Gene-harboring duplication hotspot with RENC gene found inside
chr10	76995000	77235000	UGI	COMTD1	Gene-harboring duplication hotspot with RENC gene found inside
chr10	105770000	105835000	UGI	SFR1	Non-gene duplication hotspot
chr11	740000	770000	UGI	CDHR5;SCT	Gene-harboring duplication hotspot with RENC gene found inside
chr11	2140000	2255000	UGI	ASCL2	Gene-harboring duplication hotspot with RENC gene found outside
chr11	34540000	34885000	UGI	EHF	Gene-harboring duplication hotspot with RENC gene found inside
chr11	46150000	46360000	UGI	CREB3L1	Gene-harboring duplication hotspot with RENC gene found inside
chr11	65235000	65310000	UGI	SLC25A45	Gene-harboring duplication hotspot with RENC gene found outside
chr11	67200000	67245000	UGI	CORO1B;PTPRCAP	Gene-harboring duplication hotspot with RENC gene found inside
chr11	74150000	74340000	UGI	LIPT2;LOC100287896	Gene-harboring duplication hotspot with RENC gene found inside
chr11	102355000	102390000	UGI	TMEM123	Non-gene duplication hotspot
chr12	53800000	53835000	UGI	PRR13	Gene-harboring duplication hotspot with RENC gene found outside
chr12	56375000	56615000	UGI	ERBB3	Gene-harboring duplication hotspot with RENC gene found inside
chr12	56640000	56665000	UGI	COQ10A	Gene-harboring duplication hotspot with RENC gene found inside
chr12	117500000	117565000	UGI	TESC	Non-gene duplication hotspot
chr12	120680000	120720000	UGI	RPLP0	Non-gene duplication hotspot
chr12	120745000	120775000	UGI	SIRT4	Gene-harboring duplication hotspot with RENC gene found outside
chr13	73605000	74160000	UGI	KLF5	Gene-harboring duplication hotspot with RENC gene found inside
chr14	65735000	65880000	UGI	FUT8	Non-gene duplication hotspot
chr14	68705000	68780000	UGI	ZFP36L1	Non-gene duplication hotspot
chr14	68965000	69125000	UGI	ZFP36L1	Non-gene duplication hotspot
chr14	75645000	75670000	UGI	TMED10	Non-gene duplication hotspot
chr14	103040000	103420000	UGI	RCOR1	Gene-harboring duplication hotspot with RENC gene found inside
chr16	11810000	11935000	UGI	SNX29	Gene-harboring duplication hotspot with RENC gene found outside
chr17	4315000	4385000	UGI	SPNS2	Non-gene duplication hotspot
chr17	28635000	28750000	UGI	CPD	Gene-harboring duplication hotspot with RENC gene found outside
chr17	30445000	30480000	UGI	RHOT1	Non-gene duplication hotspot
chr17	37650000	39130000	UGI	TNS4	Gene-harboring duplication hotspot with RENC gene found inside
chr17	39590000	39660000	UGI	KRT15;KRT19	Gene-harboring duplication hotspot with RENC gene found outside
chr17	39755000	39930000	UGI	JUP	Gene-harboring duplication hotspot with RENC gene found inside
chr17	48630000	49135000	UGI	ABCC3	Gene-harboring duplication hotspot with RENC gene found inside
chr17	57930000	57940000	UGI	TUBD1;RPS6KB1	Non-gene duplication hotspot
chr17	73030000	73075000	UGI	ATP5PD;KCTD2	Gene-harboring duplication hotspot with RENC gene found inside
chr18	19465000	19865000	UGI	GATA6	Gene-harboring duplication hotspot with RENC gene found inside
chr18	55680000	55695000	UGI	NEDD4L	Non-gene duplication hotspot
chr19	13925000	13995000	UGI	MISP3	Gene-harboring duplication hotspot with RENC gene found outside
chr19	18470000	18495000	UGI	GDF15	Non-gene duplication hotspot
chr19	18505000	18515000	UGI	GDF15	Non-gene duplication hotspot
chr19	35585000	35630000	UGI	FXYD3	Gene-harboring duplication hotspot with RENC gene found inside
chr19	45015000	45070000	UGI	NECTIN2	Non-gene duplication hotspot
chr19	45080000	45090000	UGI	CBLC	Non-gene duplication hotspot
chr19	45145000	45265000	UGI	BCL3	Gene-harboring duplication hotspot with RENC gene found inside
chr19	45435000	45525000	UGI	RELB	Gene-harboring duplication hotspot with RENC gene found outside
chr20	30765000	30930000	UGI	PLAGL2;POFUT1	Gene-harboring duplication hotspot with RENC gene found inside
chr20	48640000	49150000	UGI	CEBPB	Gene-harboring duplication hotspot with RENC gene found inside
chr20	52240000	52355000	UGI	ZNF217	Non-gene duplication hotspot
chr20	52395000	52560000	UGI	ZNF217	Non-gene duplication hotspot
chr22	38180000	38195000	UGI	SH3BP1	Non-gene duplication hotspot

## Sheet: BRCA_MCF7
Table S2c: RENC results from MCF7 cells
duplication_chr	duplication_start	duplication_end	gene_name	gene_ID	anchor1_chr	anchor1_start	anchor1_end	anchor2_chr	anchor2_start	anchor2_end	pets	dup_sum_pets	gene_ID_sum_pets	percentage	RENC_score	gene_rank	enhancer_rank
chr11	77890000	77960000	AAMDC	NM_001316957.2	chr11	77517637	77538892	chr11	77933027	77945093	3	3	363	0.00826446	0.0247934	5	1
chr11	77890000	77960000	AAMDC	NM_001316958.2	chr11	77517637	77538892	chr11	77933027	77945093	3	3	363	0.00826446	0.0247934	5	1
chr11	77890000	77960000	AAMDC	NM_001316960.2	chr11	77517637	77538892	chr11	77933027	77945093	3	3	363	0.00826446	0.0247934	5	1
chr11	77890000	77960000	AAMDC	NM_001316961.2	chr11	77517637	77538892	chr11	77933027	77945093	3	3	363	0.00826446	0.0247934	5	1
chr11	77890000	77960000	AAMDC	NM_001316962.2	chr11	77517637	77538892	chr11	77933027	77945093	3	3	363	0.00826446	0.0247934	5	1
chr11	77890000	77960000	AAMDC	NM_024684.4	chr11	77517637	77538892	chr11	77933027	77945093	3	3	363	0.00826446	0.0247934	5	1
chr17	27430000	27540000	ABHD15	NM_198147.3	chr17	27470591	27488148	chr17	27888911	27905334	7	7	66	0.106061	0.742424	9	1
chr19	17315000	17350000	ABHD8	NM_024527.5	chr19	17328182	17332218	chr19	17411524	17424386	7	7	216	0.0324074	0.226852	4	1
chr19	17395000	17455000	ABHD8	NM_024527.5	chr19	17411524	17424386	chr19	17434812	17442518	45	178	216	0.824074	146.685	1	3
chr19	17395000	17455000	ABHD8	NM_024527.5	chr19	17399998	17407884	chr19	17411524	17424386	60	178	216	0.824074	146.685	1	2
chr19	17395000	17455000	ABHD8	NM_024527.5	chr19	17411524	17424386	chr19	17425652	17434402	73	178	216	0.824074	146.685	1	1
chr1	1215000	1460000	ACAP3	NM_030649.3	chr1	1237447	1247831	chr1	1439603	1441558	3	100	150	0.666667	66.6667	1	4
chr1	1215000	1460000	ACAP3	NM_030649.3	chr1	1237447	1247831	chr1	1253011	1254726	30	100	150	0.666667	66.6667	1	1
chr1	1215000	1460000	ACAP3	NM_030649.3	chr1	1222297	1230919	chr1	1237447	1247831	10	100	150	0.666667	66.6667	1	3
chr1	1215000	1460000	ACAP3	NM_030649.3	chr1	1235267	1236742	chr1	1237447	1247831	30	100	150	0.666667	66.6667	1	1
chr1	1215000	1460000	ACAP3	NM_030649.3	chr1	1237447	1247831	chr1	1249198	1252080	27	100	150	0.666667	66.6667	1	2
chr1	155040000	155155000	ADAM15	NM_001261464.2	chr1	155008356	155027473	chr1	155040995	155042444	9	34	83	0.409639	13.9277	7	2
chr1	155040000	155155000	ADAM15	NM_001261464.2	chr1	155008356	155027473	chr1	155063372	155068587	8	34	83	0.409639	13.9277	7	3
chr1	155040000	155155000	ADAM15	NM_001261464.2	chr1	155008356	155027473	chr1	155088467	155094190	17	34	83	0.409639	13.9277	7	1
chr1	155040000	155155000	ADAM15	NM_001261465.2	chr1	155008356	155027473	chr1	155040995	155042444	9	34	83	0.409639	13.9277	7	2
chr1	155040000	155155000	ADAM15	NM_001261465.2	chr1	155008356	155027473	chr1	155063372	155068587	8	34	83	0.409639	13.9277	7	3
chr1	155040000	155155000	ADAM15	NM_001261465.2	chr1	155008356	155027473	chr1	155088467	155094190	17	34	83	0.409639	13.9277	7	1
chr1	155040000	155155000	ADAM15	NM_001261466.2	chr1	155008356	155027473	chr1	155040995	155042444	9	34	83	0.409639	13.9277	7	2
chr1	155040000	155155000	ADAM15	NM_001261466.2	chr1	155008356	155027473	chr1	155063372	155068587	8	34	83	0.409639	13.9277	7	3
chr1	155040000	155155000	ADAM15	NM_001261466.2	chr1	155008356	155027473	chr1	155088467	155094190	17	34	83	0.409639	13.9277	7	1
chr1	155040000	155155000	ADAM15	NM_003815.5	chr1	155008356	155027473	chr1	155040995	155042444	9	34	83	0.409639	13.9277	7	2
chr1	155040000	155155000	ADAM15	NM_003815.5	chr1	155008356	155027473	chr1	155063372	155068587	8	34	83	0.409639	13.9277	7	3
chr1	155040000	155155000	ADAM15	NM_003815.5	chr1	155008356	155027473	chr1	155088467	155094190	17	34	83	0.409639	13.9277	7	1
chr1	155040000	155155000	ADAM15	NM_207191.3	chr1	155008356	155027473	chr1	155040995	155042444	9	34	83	0.409639	13.9277	7	2
chr1	155040000	155155000	ADAM15	NM_207191.3	chr1	155008356	155027473	chr1	155063372	155068587	8	34	83	0.409639	13.9277	7	3
chr1	155040000	155155000	ADAM15	NM_207191.3	chr1	155008356	155027473	chr1	155088467	155094190	17	34	83	0.409639	13.9277	7	1
chr1	155040000	155155000	ADAM15	NM_207194.3	chr1	155008356	155027473	chr1	155040995	155042444	9	34	83	0.409639	13.9277	7	2
chr1	155040000	155155000	ADAM15	NM_207194.3	chr1	155008356	155027473	chr1	155063372	155068587	8	34	83	0.409639	13.9277	7	3
chr1	155040000	155155000	ADAM15	NM_207194.3	chr1	155008356	155027473	chr1	155088467	155094190	17	34	83	0.409639	13.9277	7	1
chr1	155040000	155155000	ADAM15	NM_207195.3	chr1	155008356	155027473	chr1	155040995	155042444	9	34	83	0.409639	13.9277	7	2
chr1	155040000	155155000	ADAM15	NM_207195.3	chr1	155008356	155027473	chr1	155063372	155068587	8	34	83	0.409639	13.9277	7	3
chr1	155040000	155155000	ADAM15	NM_207195.3	chr1	155008356	155027473	chr1	155088467	155094190	17	34	83	0.409639	13.9277	7	1
chr1	155040000	155155000	ADAM15	NM_207196.3	chr1	155008356	155027473	chr1	155040995	155042444	9	34	83	0.409639	13.9277	7	2
chr1	155040000	155155000	ADAM15	NM_207196.3	chr1	155008356	155027473	chr1	155063372	155068587	8	34	83	0.409639	13.9277	7	3
chr1	155040000	155155000	ADAM15	NM_207196.3	chr1	155008356	155027473	chr1	155088467	155094190	17	34	83	0.409639	13.9277	7	1
chr1	155040000	155155000	ADAM15	NM_207197.3	chr1	155008356	155027473	chr1	155040995	155042444	9	34	83	0.409639	13.9277	7	2
chr1	155040000	155155000	ADAM15	NM_207197.3	chr1	155008356	155027473	chr1	155063372	155068587	8	34	83	0.409639	13.9277	7	3
chr1	155040000	155155000	ADAM15	NM_207197.3	chr1	155008356	155027473	chr1	155088467	155094190	17	34	83	0.409639	13.9277	7	1
chr20	48930000	48970000	ADNP	NM_001282531.3	chr20	48918338	48933197	chr20	49545238	49550284	3	3	204	0.0147059	0.0441176	7	1
chr20	48930000	48970000	ADNP	NM_001347511.2	chr20	48918338	48933197	chr20	49545238	49550284	3	3	204	0.0147059	0.0441176	7	1
chr20	48930000	48970000	ADNP	NM_015339.5	chr20	48918338	48933197	chr20	49545238	49550284	3	3	204	0.0147059	0.0441176	7	1
chr20	48930000	48970000	ADNP	NM_181442.4	chr20	48918338	48933197	chr20	49545238	49550284	3	3	204	0.0147059	0.0441176	7	1
chr1	1215000	1460000	AGRN	NM_001305275.2	chr1	954434	958248	chr1	1222297	1230919	3	7	75	0.0933333	0.653333	9	2
chr1	1215000	1460000	AGRN	NM_001305275.2	chr1	954434	958248	chr1	1235267	1236742	4	7	75	0.0933333	0.653333	9	1
chr1	1215000	1460000	AGRN	NM_198576.4	chr1	954434	958248	chr1	1222297	1230919	3	7	75	0.0933333	0.653333	9	2
chr1	1215000	1460000	AGRN	NM_198576.4	chr1	954434	958248	chr1	1235267	1236742	4	7	75	0.0933333	0.653333	9	1
chr14	105280000	105300000	AHNAK2	NM_001350929.2	chr14	105285460	105288208	chr14	105432715	105447250	9	9	95	0.0947368	0.852632	5	1
chr14	105280000	105300000	AHNAK2	NM_138420.4	chr14	105285460	105288208	chr14	105432715	105447250	9	9	95	0.0947368	0.852632	5	1
chr10	5580000	5615000	AKR1E2	NM_001040177.3	chr10	4866223	4869789	chr10	5585923	5594543	3	3	14	0.214286	0.642857	11	1
chr10	5580000	5615000	AKR1E2	NM_001271021.2	chr10	4866223	4869789	chr10	5585923	5594543	3	3	14	0.214286	0.642857	11	1
chr10	5580000	5615000	AKR1E2	NM_001271025.2	chr10	4866223	4869789	chr10	5585923	5594543	3	3	14	0.214286	0.642857	11	1
chr14	105280000	105300000	AKT1	NM_001014431.2	chr14	105260038	105264404	chr14	105281064	105283703	8	8	25	0.32	2.56	4	1
chr14	105280000	105300000	AKT1	NM_001014432.2	chr14	105260038	105264404	chr14	105281064	105283703	8	8	25	0.32	2.56	4	1
chr14	105280000	105300000	AKT1	NM_001382430.1	chr14	105260038	105264404	chr14	105281064	105283703	8	8	25	0.32	2.56	4	1
chr14	105280000	105300000	AKT1	NM_001382431.1	chr14	105260038	105264404	chr14	105281064	105283703	8	8	25	0.32	2.56	4	1
chr14	105280000	105300000	AKT1	NM_001382432.1	chr14	105260038	105264404	chr14	105281064	105283703	8	8	25	0.32	2.56	4	1
chr14	105280000	105300000	AKT1	NM_001382433.1	chr14	105260038	105264404	chr14	105281064	105283703	8	8	25	0.32	2.56	4	1
chr11	65270000	65290000	ANKRD13D	NM_001347901.2	chr11	65263078	65280458	chr11	67050381	67061901	3	3	226	0.0132743	0.039823	54	1
chr11	65270000	65290000	ANKRD13D	NM_207354.3	chr11	65263078	65280458	chr11	67050381	67061901	3	3	226	0.0132743	0.039823	54	1
chr10	5580000	5615000	ANKRD16	NM_001009941.3	chr10	5585923	5594543	chr10	5927366	5933635	8	12	39	0.307692	3.69231	8	1
chr10	5580000	5615000	ANKRD16	NM_001009941.3	chr10	5594844	5598238	chr10	5927366	5933635	4	12	39	0.307692	3.69231	8	2
chr10	5580000	5615000	ANKRD16	NM_001009943.3	chr10	5594844	5598238	chr10	5927366	5933635	4	12	39	0.307692	3.69231	8	2
chr10	5580000	5615000	ANKRD16	NM_001009943.3	chr10	5585923	5594543	chr10	5927366	5933635	8	12	39	0.307692	3.69231	8	1
chr10	5580000	5615000	ANKRD16	NM_019046.3	chr10	5585923	5594543	chr10	5927366	5933635	8	12	39	0.307692	3.69231	8	1
chr10	5580000	5615000	ANKRD16	NM_019046.3	chr10	5594844	5598238	chr10	5927366	5933635	4	12	39	0.307692	3.69231	8	2
chr10	5670000	5735000	ANKRD16	NM_001009941.3	chr10	5700589	5702628	chr10	5927366	5933635	3	3	39	0.0769231	0.230769	5	1
chr10	5670000	5735000	ANKRD16	NM_001009943.3	chr10	5700589	5702628	chr10	5927366	5933635	3	3	39	0.0769231	0.230769	5	1
chr10	5670000	5735000	ANKRD16	NM_019046.3	chr10	5700589	5702628	chr10	5927366	5933635	3	3	39	0.0769231	0.230769	5	1
chr22	38435000	38445000	ANKRD54	NM_001349853.2	chr22	38243588	38246107	chr22	38433383	38436202	3	3	39	0.0769231	0.230769	1	1
chr19	17395000	17455000	ANO8	NM_020959.3	chr19	17434812	17442518	chr19	17442965	17452305	63	127	180	0.705556	89.6056	2	1
chr19	17395000	17455000	ANO8	NM_020959.3	chr19	17399998	17407884	chr19	17442965	17452305	23	127	180	0.705556	89.6056	2	3
chr19	17395000	17455000	ANO8	NM_020959.3	chr19	17425652	17434402	chr19	17442965	17452305	41	127	180	0.705556	89.6056	2	2
chr11	65270000	65290000	AP5B1	NM_138368.5	chr11	65263078	65280458	chr11	65546502	65551084	11	11	89	0.123596	1.35955	19	1
chr11	34460000	34945000	APIP	NM_015957.4	chr11	34558759	34560393	chr11	34936177	34941477	4	54	172	0.313953	16.9535	1	5
chr11	34460000	34945000	APIP	NM_015957.4	chr11	34581734	34583752	chr11	34936177	34941477	4	54	172	0.313953	16.9535	1	5
chr11	34460000	34945000	APIP	NM_015957.4	chr11	34591336	34593363	chr11	34936177	34941477	6	54	172	0.313953	16.9535	1	3
chr11	34460000	34945000	APIP	NM_015957.4	chr11	34607365	34609498	chr11	34936177	34941477	3	54	172	0.313953	16.9535	1	6
chr11	34460000	34945000	APIP	NM_015957.4	chr11	34689048	34690397	chr11	34936177	34941477	3	54	172	0.313953	16.9535	1	6
chr11	34460000	34945000	APIP	NM_015957.4	chr11	34774739	34779631	chr11	34936177	34941477	5	54	172	0.313953	16.9535	1	4
chr11	34460000	34945000	APIP	NM_015957.4	chr11	34918613	34921472	chr11	34936177	34941477	9	54	172	0.313953	16.9535	1	2
chr11	34460000	34945000	APIP	NM_015957.4	chr11	34931187	34934052	chr11	34936177	34941477	20	54	172	0.313953	16.9535	1	1
chr12	12020000	12210000	APOLD1	NM_001130415.2	chr12	12027085	12033230	chr12	12866703	12881004	7	32	1122	0.0285205	0.912656	2	1
chr12	12020000	12210000	APOLD1	NM_001130415.2	chr12	12037482	12040026	chr12	12866703	12881004	4	32	1122	0.0285205	0.912656	2	3
chr12	12020000	12210000	APOLD1	NM_001130415.2	chr12	12071342	12072997	chr12	12866703	12881004	4	32	1122	0.0285205	0.912656	2	3
chr12	12020000	12210000	APOLD1	NM_001130415.2	chr12	12099926	12104468	chr12	12866703	12881004	3	32	1122	0.0285205	0.912656	2	4
chr12	12020000	12210000	APOLD1	NM_001130415.2	chr12	12159833	12165330	chr12	12866703	12881004	4	32	1122	0.0285205	0.912656	2	3
chr12	12020000	12210000	APOLD1	NM_001130415.2	chr12	12176644	12179414	chr12	12866703	12881004	6	32	1122	0.0285205	0.912656	2	2
chr12	12020000	12210000	APOLD1	NM_001130415.2	chr12	12184139	12187046	chr12	12866703	12881004	4	32	1122	0.0285205	0.912656	2	3
chr17	57855000	58625000	APPBP2	NM_001282476.2	chr17	57877274	57882708	chr17	58600844	58604752	3	1018	2094	0.486151	494.902	7	26
chr17	57855000	58625000	APPBP2	NM_001282476.2	chr17	57884265	57887088	chr17	58600844	58604752	3	1018	2094	0.486151	494.902	7	26
chr17	57855000	58625000	APPBP2	NM_001282476.2	chr17	57898568	57951001	chr17	58600844	58604752	270	1018	2094	0.486151	494.902	7	1
chr17	57855000	58625000	APPBP2	NM_001282476.2	chr17	57991124	57992570	chr17	58600844	58604752	6	1018	2094	0.486151	494.902	7	23
chr17	57855000	58625000	APPBP2	NM_001282476.2	chr17	58244094	58246096	chr17	58600844	58604752	8	1018	2094	0.486151	494.902	7	21
chr17	57855000	58625000	APPBP2	NM_001282476.2	chr17	58007346	58009033	chr17	58600844	58604752	5	1018	2094	0.486151	494.902	7	24
chr17	57855000	58625000	APPBP2	NM_001282476.2	chr17	58095435	58096822	chr17	58600844	58604752	3	1018	2094	0.486151	494.902	7	26
chr17	57855000	58625000	APPBP2	NM_001282476.2	chr17	57975877	57977301	chr17	58600844	58604752	4	1018	2094	0.486151	494.902	7	25
chr17	57855000	58625000	APPBP2	NM_001282476.2	chr17	58164123	58167274	chr17	58600844	58604752	34	1018	2094	0.486151	494.902	7	9
chr17	57855000	58625000	APPBP2	NM_001282476.2	chr17	57859950	57872352	chr17	58600844	58604752	13	1018	2094	0.486151	494.902	7	17
chr17	57855000	58625000	APPBP2	NM_001282476.2	chr17	58216580	58217949	chr17	58600844	58604752	9	1018	2094	0.486151	494.902	7	20
chr17	57855000	58625000	APPBP2	NM_001282476.2	chr17	58113537	58117893	chr17	58600844	58604752	25	1018	2094	0.486151	494.902	7	10
chr17	57855000	58625000	APPBP2	NM_001282476.2	chr17	57852365	57856574	chr17	58600844	58604752	6	1018	2094	0.486151	494.902	7	23
chr17	57855000	58625000	APPBP2	NM_001282476.2	chr17	58238410	58242905	chr17	58600844	58604752	21	1018	2094	0.486151	494.902	7	12
chr17	57855000	58625000	APPBP2	NM_001282476.2	chr17	58247087	58249980	chr17	58600844	58604752	24	1018	2094	0.486151	494.902	7	11
chr17	57855000	58625000	APPBP2	NM_001282476.2	chr17	58218394	58221266	chr17	58600844	58604752	13	1018	2094	0.486151	494.902	7	17
chr17	57855000	58625000	APPBP2	NM_001282476.2	chr17	58231274	58234451	chr17	58600844	58604752	15	1018	2094	0.486151	494.902	7	15
chr17	57855000	58625000	APPBP2	NM_001282476.2	chr17	58307412	58309337	chr17	58600844	58604752	15	1018	2094	0.486151	494.902	7	15
chr17	57855000	58625000	APPBP2	NM_001282476.2	chr17	58167891	58171580	chr17	58600844	58604752	37	1018	2094	0.486151	494.902	7	8
chr17	57855000	58625000	APPBP2	NM_001282476.2	chr17	58251468	58253240	chr17	58600844	58604752	7	1018	2094	0.486151	494.902	7	22
chr17	57855000	58625000	APPBP2	NM_001282476.2	chr17	58274995	58276427	chr17	58600844	58604752	10	1018	2094	0.486151	494.902	7	19
chr17	57855000	58625000	APPBP2	NM_001282476.2	chr17	58184262	58186837	chr17	58600844	58604752	13	1018	2094	0.486151	494.902	7	17
chr17	57855000	58625000	APPBP2	NM_001282476.2	chr17	58211415	58213749	chr17	58600844	58604752	24	1018	2094	0.486151	494.902	7	11
chr17	57855000	58625000	APPBP2	NM_001282476.2	chr17	58493436	58494628	chr17	58600844	58604752	8	1018	2094	0.486151	494.902	7	21
chr17	57855000	58625000	APPBP2	NM_001282476.2	chr17	58422067	58424935	chr17	58600844	58604752	38	1018	2094	0.486151	494.902	7	7
chr17	57855000	58625000	APPBP2	NM_001282476.2	chr17	58429026	58436775	chr17	58600844	58604752	83	1018	2094	0.486151	494.902	7	2
chr17	57855000	58625000	APPBP2	NM_001282476.2	chr17	58447897	58451495	chr17	58600844	58604752	41	1018	2094	0.486151	494.902	7	5
chr17	57855000	58625000	APPBP2	NM_001282476.2	chr17	58497978	58499334	chr17	58600844	58604752	18	1018	2094	0.486151	494.902	7	13
chr17	57855000	58625000	APPBP2	NM_001282476.2	chr17	58459054	58460384	chr17	58600844	58604752	17	1018	2094	0.486151	494.902	7	14
chr17	57855000	58625000	APPBP2	NM_001282476.2	chr17	58462244	58463874	chr17	58600844	58604752	10	1018	2094	0.486151	494.902	7	19
chr17	57855000	58625000	APPBP2	NM_001282476.2	chr17	58557684	58559095	chr17	58600844	58604752	82	1018	2094	0.486151	494.902	7	3
chr17	57855000	58625000	APPBP2	NM_001282476.2	chr17	58519776	58522036	chr17	58600844	58604752	39	1018	2094	0.486151	494.902	7	6
chr17	57855000	58625000	APPBP2	NM_001282476.2	chr17	58419321	58420597	chr17	58600844	58604752	11	1018	2094	0.486151	494.902	7	18
chr17	57855000	58625000	APPBP2	NM_001282476.2	chr17	58391741	58394650	chr17	58600844	58604752	17	1018	2094	0.486151	494.902	7	14
chr17	57855000	58625000	APPBP2	NM_001282476.2	chr17	58381442	58383774	chr17	58600844	58604752	6	1018	2094	0.486151	494.902	7	23
chr17	57855000	58625000	APPBP2	NM_001282476.2	chr17	58546637	58548214	chr17	58600844	58604752	50	1018	2094	0.486151	494.902	7	4
chr17	57855000	58625000	APPBP2	NM_001282476.2	chr17	58512876	58514581	chr17	58600844	58604752	6	1018	2094	0.486151	494.902	7	23
chr17	57855000	58625000	APPBP2	NM_001282476.2	chr17	58179344	58180608	chr17	58600844	58604752	14	1018	2094	0.486151	494.902	7	16
chr17	57855000	58625000	APPBP2	NM_001282476.2	chr17	58507904	58509794	chr17	58600844	58604752	10	1018	2094	0.486151	494.902	7	19
chr17	57855000	58625000	APPBP2	NM_006380.5	chr17	57877274	57882708	chr17	58600844	58604752	3	1018	2094	0.486151	494.902	7	26
chr17	57855000	58625000	APPBP2	NM_006380.5	chr17	58007346	58009033	chr17	58600844	58604752	5	1018	2094	0.486151	494.902	7	24
chr17	57855000	58625000	APPBP2	NM_006380.5	chr17	57898568	57951001	chr17	58600844	58604752	270	1018	2094	0.486151	494.902	7	1
chr17	57855000	58625000	APPBP2	NM_006380.5	chr17	57991124	57992570	chr17	58600844	58604752	6	1018	2094	0.486151	494.902	7	23
chr17	57855000	58625000	APPBP2	NM_006380.5	chr17	57884265	57887088	chr17	58600844	58604752	3	1018	2094	0.486151	494.902	7	26
chr17	57855000	58625000	APPBP2	NM_006380.5	chr17	58095435	58096822	chr17	58600844	58604752	3	1018	2094	0.486151	494.902	7	26
chr17	57855000	58625000	APPBP2	NM_006380.5	chr17	57975877	57977301	chr17	58600844	58604752	4	1018	2094	0.486151	494.902	7	25
chr17	57855000	58625000	APPBP2	NM_006380.5	chr17	58244094	58246096	chr17	58600844	58604752	8	1018	2094	0.486151	494.902	7	21
chr17	57855000	58625000	APPBP2	NM_006380.5	chr17	58247087	58249980	chr17	58600844	58604752	24	1018	2094	0.486151	494.902	7	11
chr17	57855000	58625000	APPBP2	NM_006380.5	chr17	58429026	58436775	chr17	58600844	58604752	83	1018	2094	0.486151	494.902	7	2
chr17	57855000	58625000	APPBP2	NM_006380.5	chr17	58113537	58117893	chr17	58600844	58604752	25	1018	2094	0.486151	494.902	7	10
chr17	57855000	58625000	APPBP2	NM_006380.5	chr17	58164123	58167274	chr17	58600844	58604752	34	1018	2094	0.486151	494.902	7	9
chr17	57855000	58625000	APPBP2	NM_006380.5	chr17	58167891	58171580	chr17	58600844	58604752	37	1018	2094	0.486151	494.902	7	8
chr17	57855000	58625000	APPBP2	NM_006380.5	chr17	58218394	58221266	chr17	58600844	58604752	13	1018	2094	0.486151	494.902	7	17
chr17	57855000	58625000	APPBP2	NM_006380.5	chr17	58184262	58186837	chr17	58600844	58604752	13	1018	2094	0.486151	494.902	7	17
chr17	57855000	58625000	APPBP2	NM_006380.5	chr17	58211415	58213749	chr17	58600844	58604752	24	1018	2094	0.486151	494.902	7	11
chr17	57855000	58625000	APPBP2	NM_006380.5	chr17	57859950	57872352	chr17	58600844	58604752	13	1018	2094	0.486151	494.902	7	17
chr17	57855000	58625000	APPBP2	NM_006380.5	chr17	58381442	58383774	chr17	58600844	58604752	6	1018	2094	0.486151	494.902	7	23
chr17	57855000	58625000	APPBP2	NM_006380.5	chr17	58251468	58253240	chr17	58600844	58604752	7	1018	2094	0.486151	494.902	7	22
chr17	57855000	58625000	APPBP2	NM_006380.5	chr17	58274995	58276427	chr17	58600844	58604752	10	1018	2094	0.486151	494.902	7	19
chr17	57855000	58625000	APPBP2	NM_006380.5	chr17	58216580	58217949	chr17	58600844	58604752	9	1018	2094	0.486151	494.902	7	20
chr17	57855000	58625000	APPBP2	NM_006380.5	chr17	58422067	58424935	chr17	58600844	58604752	38	1018	2094	0.486151	494.902	7	7
chr17	57855000	58625000	APPBP2	NM_006380.5	chr17	58493436	58494628	chr17	58600844	58604752	8	1018	2094	0.486151	494.902	7	21
chr17	57855000	58625000	APPBP2	NM_006380.5	chr17	58447897	58451495	chr17	58600844	58604752	41	1018	2094	0.486151	494.902	7	5
chr17	57855000	58625000	APPBP2	NM_006380.5	chr17	58307412	58309337	chr17	58600844	58604752	15	1018	2094	0.486151	494.902	7	15
chr17	57855000	58625000	APPBP2	NM_006380.5	chr17	58462244	58463874	chr17	58600844	58604752	10	1018	2094	0.486151	494.902	7	19
chr17	57855000	58625000	APPBP2	NM_006380.5	chr17	58512876	58514581	chr17	58600844	58604752	6	1018	2094	0.486151	494.902	7	23
chr17	57855000	58625000	APPBP2	NM_006380.5	chr17	58231274	58234451	chr17	58600844	58604752	15	1018	2094	0.486151	494.902	7	15
chr17	57855000	58625000	APPBP2	NM_006380.5	chr17	58459054	58460384	chr17	58600844	58604752	17	1018	2094	0.486151	494.902	7	14
chr17	57855000	58625000	APPBP2	NM_006380.5	chr17	58507904	58509794	chr17	58600844	58604752	10	1018	2094	0.486151	494.902	7	19
chr17	57855000	58625000	APPBP2	NM_006380.5	chr17	58557684	58559095	chr17	58600844	58604752	82	1018	2094	0.486151	494.902	7	3
chr17	57855000	58625000	APPBP2	NM_006380.5	chr17	58519776	58522036	chr17	58600844	58604752	39	1018	2094	0.486151	494.902	7	6
chr17	57855000	58625000	APPBP2	NM_006380.5	chr17	58238410	58242905	chr17	58600844	58604752	21	1018	2094	0.486151	494.902	7	12
chr17	57855000	58625000	APPBP2	NM_006380.5	chr17	57852365	57856574	chr17	58600844	58604752	6	1018	2094	0.486151	494.902	7	23
chr17	57855000	58625000	APPBP2	NM_006380.5	chr17	58419321	58420597	chr17	58600844	58604752	11	1018	2094	0.486151	494.902	7	18
chr17	57855000	58625000	APPBP2	NM_006380.5	chr17	58546637	58548214	chr17	58600844	58604752	50	1018	2094	0.486151	494.902	7	4
chr17	57855000	58625000	APPBP2	NM_006380.5	chr17	58497978	58499334	chr17	58600844	58604752	18	1018	2094	0.486151	494.902	7	13
chr17	57855000	58625000	APPBP2	NM_006380.5	chr17	58391741	58394650	chr17	58600844	58604752	17	1018	2094	0.486151	494.902	7	14
chr17	57855000	58625000	APPBP2	NM_006380.5	chr17	58179344	58180608	chr17	58600844	58604752	14	1018	2094	0.486151	494.902	7	16
chr17	58695000	58705000	APPBP2	NM_001282476.2	chr17	58600844	58604752	chr17	58704142	58706039	73	73	2094	0.0348615	2.54489	2	1
chr17	58695000	58705000	APPBP2	NM_006380.5	chr17	58600844	58604752	chr17	58704142	58706039	73	73	2094	0.0348615	2.54489	2	1
chr11	72895000	72925000	ARAP1	NM_001040118.3	chr11	72461016	72471018	chr11	72895579	72899778	5	19	357	0.0532213	1.0112	9	3
chr11	72895000	72925000	ARAP1	NM_001040118.3	chr11	72461016	72471018	chr11	72900568	72909187	14	19	357	0.0532213	1.0112	9	1
chr11	72895000	72925000	ARAP1	NM_001135190.2	chr11	72428592	72434878	chr11	72900568	72909187	9	9	37	0.243243	2.18919	8	2
chr11	72895000	72925000	ARAP1	NM_001369489.1	chr11	72428592	72434878	chr11	72900568	72909187	9	9	37	0.243243	2.18919	8	2
chr11	72895000	72925000	ARAP1	NM_015242.5	chr11	72428592	72434878	chr11	72900568	72909187	9	9	37	0.243243	2.18919	8	2
chr14	50305000	50415000	ARF6	NM_001663.4	chr14	50327194	50331213	chr14	50358562	50363554	51	232	1317	0.176158	40.8686	1	3
chr14	50305000	50415000	ARF6	NM_001663.4	chr14	50331503	50332862	chr14	50358562	50363554	24	232	1317	0.176158	40.8686	1	5
chr14	50305000	50415000	ARF6	NM_001663.4	chr14	50333438	50336409	chr14	50358562	50363554	55	232	1317	0.176158	40.8686	1	1
chr14	50305000	50415000	ARF6	NM_001663.4	chr14	50345960	50347253	chr14	50358562	50363554	32	232	1317	0.176158	40.8686	1	4
chr14	50305000	50415000	ARF6	NM_001663.4	chr14	50358562	50363554	chr14	50371448	50376819	53	232	1317	0.176158	40.8686	1	2
chr14	50305000	50415000	ARF6	NM_001663.4	chr14	50358562	50363554	chr14	50387133	50388899	7	232	1317	0.176158	40.8686	1	7
chr14	50305000	50415000	ARF6	NM_001663.4	chr14	50358562	50363554	chr14	50412943	50414241	10	232	1317	0.176158	40.8686	1	6
chr4	153970000	154005000	ARFIP1	NM_001025593.3	chr4	153698338	153702450	chr4	153982696	153989263	4	7	19	0.368421	2.57895	1	1
chr4	153970000	154005000	ARFIP1	NM_001025593.3	chr4	153698338	153702450	chr4	154003542	154005424	3	7	19	0.368421	2.57895	1	2
chr4	153970000	154005000	ARFIP1	NM_001025595.3	chr4	153698338	153702450	chr4	153982696	153989263	4	7	19	0.368421	2.57895	1	1
chr4	153970000	154005000	ARFIP1	NM_001025595.3	chr4	153698338	153702450	chr4	154003542	154005424	3	7	19	0.368421	2.57895	1	2
chr4	153970000	154005000	ARFIP1	NM_001287431.2	chr4	153698338	153702450	chr4	153982696	153989263	4	7	19	0.368421	2.57895	1	1
chr4	153970000	154005000	ARFIP1	NM_001287431.2	chr4	153698338	153702450	chr4	154003542	154005424	3	7	19	0.368421	2.57895	1	2
chr4	153970000	154005000	ARFIP1	NM_001287432.2	chr4	153698338	153702450	chr4	153982696	153989263	4	7	19	0.368421	2.57895	1	1
chr4	153970000	154005000	ARFIP1	NM_001287432.2	chr4	153698338	153702450	chr4	154003542	154005424	3	7	19	0.368421	2.57895	1	2
chr4	153970000	154005000	ARFIP1	NM_001287433.2	chr4	153698338	153702450	chr4	153982696	153989263	4	7	19	0.368421	2.57895	1	1
chr4	153970000	154005000	ARFIP1	NM_001287433.2	chr4	153698338	153702450	chr4	154003542	154005424	3	7	19	0.368421	2.57895	1	2
chr4	153970000	154005000	ARFIP1	NM_014447.4	chr4	153698338	153702450	chr4	153982696	153989263	4	7	19	0.368421	2.57895	1	1
chr4	153970000	154005000	ARFIP1	NM_014447.4	chr4	153698338	153702450	chr4	154003542	154005424	3	7	19	0.368421	2.57895	1	2
chr11	72895000	72925000	ARHGEF17	NM_014786.4	chr11	72900568	72909187	chr11	73016656	73023962	28	28	137	0.20438	5.72263	5	1
chr1	155900000	155970000	ARHGEF2	NM_001162383.2	chr1	155939807	155941614	chr1	155943487	155955236	17	58	97	0.597938	34.6804	1	2
chr1	155900000	155970000	ARHGEF2	NM_001162383.2	chr1	155930170	155933104	chr1	155943487	155955236	25	58	97	0.597938	34.6804	1	1
chr1	155900000	155970000	ARHGEF2	NM_001162383.2	chr1	155907556	155908677	chr1	155943487	155955236	7	58	97	0.597938	34.6804	1	4
chr1	155900000	155970000	ARHGEF2	NM_001162383.2	chr1	155943487	155955236	chr1	155958552	155959968	9	58	97	0.597938	34.6804	1	3
chr1	155900000	155970000	ARHGEF2	NM_001162384.2	chr1	155907556	155908677	chr1	155943487	155955236	7	58	97	0.597938	34.6804	1	4
chr1	155900000	155970000	ARHGEF2	NM_001162384.2	chr1	155930170	155933104	chr1	155943487	155955236	25	58	97	0.597938	34.6804	1	1
chr1	155900000	155970000	ARHGEF2	NM_001162384.2	chr1	155939807	155941614	chr1	155943487	155955236	17	58	97	0.597938	34.6804	1	2
chr1	155900000	155970000	ARHGEF2	NM_001162384.2	chr1	155943487	155955236	chr1	155958552	155959968	9	58	97	0.597938	34.6804	1	3
chr1	155900000	155970000	ARHGEF2	NM_001350110.2	chr1	155930170	155933104	chr1	155943487	155955236	25	58	97	0.597938	34.6804	1	1
chr1	155900000	155970000	ARHGEF2	NM_001350110.2	chr1	155907556	155908677	chr1	155943487	155955236	7	58	97	0.597938	34.6804	1	4
chr1	155900000	155970000	ARHGEF2	NM_001350110.2	chr1	155939807	155941614	chr1	155943487	155955236	17	58	97	0.597938	34.6804	1	2
chr1	155900000	155970000	ARHGEF2	NM_001350110.2	chr1	155943487	155955236	chr1	155958552	155959968	9	58	97	0.597938	34.6804	1	3
chr1	155900000	155970000	ARHGEF2	NM_001350111.2	chr1	155943487	155955236	chr1	155958552	155959968	9	58	97	0.597938	34.6804	1	3
chr1	155900000	155970000	ARHGEF2	NM_001350111.2	chr1	155939807	155941614	chr1	155943487	155955236	17	58	97	0.597938	34.6804	1	2
chr1	155900000	155970000	ARHGEF2	NM_001350111.2	chr1	155930170	155933104	chr1	155943487	155955236	25	58	97	0.597938	34.6804	1	1
chr1	155900000	155970000	ARHGEF2	NM_001350111.2	chr1	155907556	155908677	chr1	155943487	155955236	7	58	97	0.597938	34.6804	1	4
chr1	155900000	155970000	ARHGEF2	NM_001350112.2	chr1	155907556	155908677	chr1	155943487	155955236	7	58	97	0.597938	34.6804	1	4
chr1	155900000	155970000	ARHGEF2	NM_001350112.2	chr1	155930170	155933104	chr1	155943487	155955236	25	58	97	0.597938	34.6804	1	1
chr1	155900000	155970000	ARHGEF2	NM_001350112.2	chr1	155939807	155941614	chr1	155943487	155955236	17	58	97	0.597938	34.6804	1	2
chr1	155900000	155970000	ARHGEF2	NM_001350112.2	chr1	155943487	155955236	chr1	155958552	155959968	9	58	97	0.597938	34.6804	1	3
chr1	155900000	155970000	ARHGEF2	NM_004723.4	chr1	155943487	155955236	chr1	155958552	155959968	9	58	97	0.597938	34.6804	1	3
chr1	155900000	155970000	ARHGEF2	NM_004723.4	chr1	155907556	155908677	chr1	155943487	155955236	7	58	97	0.597938	34.6804	1	4
chr1	155900000	155970000	ARHGEF2	NM_004723.4	chr1	155930170	155933104	chr1	155943487	155955236	25	58	97	0.597938	34.6804	1	1
chr1	155900000	155970000	ARHGEF2	NM_004723.4	chr1	155939807	155941614	chr1	155943487	155955236	17	58	97	0.597938	34.6804	1	2
chr1	235120000	235300000	ARID4B	NM_001206794.2	chr1	235264655	235269604	chr1	235488183	235495898	9	13	121	0.107438	1.39669	3	1
chr1	235120000	235300000	ARID4B	NM_001206794.2	chr1	235246015	235247839	chr1	235488183	235495898	4	13	121	0.107438	1.39669	3	2
chr1	235120000	235300000	ARID4B	NM_016374.6	chr1	235246015	235247839	chr1	235488183	235495898	4	13	121	0.107438	1.39669	3	2
chr1	235120000	235300000	ARID4B	NM_016374.6	chr1	235264655	235269604	chr1	235488183	235495898	9	13	121	0.107438	1.39669	3	1
chr1	235120000	235300000	ARID4B	NM_031371.4	chr1	235264655	235269604	chr1	235488183	235495898	9	13	121	0.107438	1.39669	3	1
chr1	235120000	235300000	ARID4B	NM_031371.4	chr1	235246015	235247839	chr1	235488183	235495898	4	13	121	0.107438	1.39669	3	2
chr11	65270000	65290000	ARL2	NM_001199745.2	chr11	64780355	64782514	chr11	65263078	65280458	7	7	42	0.166667	1.16667	22	1
chr11	65270000	65290000	ARL2	NM_001667.4	chr11	64780355	64782514	chr11	65263078	65280458	7	7	42	0.166667	1.16667	22	1
chr3	4735000	4805000	ARL8B	NM_018184.3	chr3	4735754	4738405	chr3	5163270	5165791	6	35	72	0.486111	17.0139	2	2
chr3	4735000	4805000	ARL8B	NM_018184.3	chr3	4742595	4744022	chr3	5163270	5165791	5	35	72	0.486111	17.0139	2	3
chr3	4735000	4805000	ARL8B	NM_018184.3	chr3	4744451	4745872	chr3	5163270	5165791	3	35	72	0.486111	17.0139	2	5
chr3	4735000	4805000	ARL8B	NM_018184.3	chr3	4750778	4767098	chr3	5163270	5165791	17	35	72	0.486111	17.0139	2	1
chr3	4735000	4805000	ARL8B	NM_018184.3	chr3	4781983	4787102	chr3	5163270	5165791	4	35	72	0.486111	17.0139	2	4
chr6	151905000	151995000	ARMT1	NM_001286562.2	chr6	151771023	151775681	chr6	151923744	151925179	3	272	734	0.370572	100.796	2	8
chr6	151905000	151995000	ARMT1	NM_001286562.2	chr6	151771023	151775681	chr6	151930156	151931438	5	272	734	0.370572	100.796	2	7
chr6	151905000	151995000	ARMT1	NM_001286562.2	chr6	151771023	151775681	chr6	151936610	151938712	43	272	734	0.370572	100.796	2	3
chr6	151905000	151995000	ARMT1	NM_001286562.2	chr6	151771023	151775681	chr6	151940905	151942107	13	272	734	0.370572	100.796	2	5
chr6	151905000	151995000	ARMT1	NM_001286562.2	chr6	151771023	151775681	chr6	151948708	151951878	5	272	734	0.370572	100.796	2	7
chr6	151905000	151995000	ARMT1	NM_001286562.2	chr6	151771023	151775681	chr6	151953264	151955908	43	272	734	0.370572	100.796	2	3
chr6	151905000	151995000	ARMT1	NM_001286562.2	chr6	151771023	151775681	chr6	151968853	151969938	10	272	734	0.370572	100.796	2	6
chr6	151905000	151995000	ARMT1	NM_001286562.2	chr6	151771023	151775681	chr6	151973181	151974507	21	272	734	0.370572	100.796	2	4
chr6	151905000	151995000	ARMT1	NM_001286562.2	chr6	151771023	151775681	chr6	151978670	151983985	65	272	734	0.370572	100.796	2	1
chr6	151905000	151995000	ARMT1	NM_001286562.2	chr6	151771023	151775681	chr6	151985144	151990708	64	272	734	0.370572	100.796	2	2
chr6	151905000	151995000	ARMT1	NM_024573.3	chr6	151771023	151775681	chr6	151923744	151925179	3	272	734	0.370572	100.796	2	8
chr6	151905000	151995000	ARMT1	NM_024573.3	chr6	151771023	151775681	chr6	151930156	151931438	5	272	734	0.370572	100.796	2	7
chr6	151905000	151995000	ARMT1	NM_024573.3	chr6	151771023	151775681	chr6	151936610	151938712	43	272	734	0.370572	100.796	2	3
chr6	151905000	151995000	ARMT1	NM_024573.3	chr6	151771023	151775681	chr6	151940905	151942107	13	272	734	0.370572	100.796	2	5
chr6	151905000	151995000	ARMT1	NM_024573.3	chr6	151771023	151775681	chr6	151948708	151951878	5	272	734	0.370572	100.796	2	7
chr6	151905000	151995000	ARMT1	NM_024573.3	chr6	151771023	151775681	chr6	151953264	151955908	43	272	734	0.370572	100.796	2	3
chr6	151905000	151995000	ARMT1	NM_024573.3	chr6	151771023	151775681	chr6	151968853	151969938	10	272	734	0.370572	100.796	2	6
chr6	151905000	151995000	ARMT1	NM_024573.3	chr6	151771023	151775681	chr6	151973181	151974507	21	272	734	0.370572	100.796	2	4
chr6	151905000	151995000	ARMT1	NM_024573.3	chr6	151771023	151775681	chr6	151978670	151983985	65	272	734	0.370572	100.796	2	1
chr6	151905000	151995000	ARMT1	NM_024573.3	chr6	151771023	151775681	chr6	151985144	151990708	64	272	734	0.370572	100.796	2	2
chr10	5580000	5615000	ASB13	NM_024701.4	chr10	5585923	5594543	chr10	5705508	5711650	47	47	89	0.52809	24.8202	4	1
chr6	119190000	119340000	ASF1A	NM_014034.3	chr6	119196228	119198370	chr6	119212636	119219372	27	55	85	0.647059	35.5882	1	1
chr6	119190000	119340000	ASF1A	NM_014034.3	chr6	119200984	119204168	chr6	119212636	119219372	18	55	85	0.647059	35.5882	1	2
chr6	119190000	119340000	ASF1A	NM_014034.3	chr6	119212636	119219372	chr6	119238795	119241065	10	55	85	0.647059	35.5882	1	3
chr19	12960000	13275000	ASF1B	NM_018154.3	chr19	13270927	13276769	chr19	14246169	14251775	4	4	345	0.0115942	0.0463768	27	1
chr1	1215000	1460000	ATAD3A	NM_001170535.3	chr1	1439603	1441558	chr1	1445940	1448014	13	13	20	0.65	8.45	7	1
chr1	1215000	1460000	ATAD3A	NM_001170536.3	chr1	1439603	1441558	chr1	1445940	1448014	13	13	20	0.65	8.45	7	1
chr1	1215000	1460000	ATAD3A	NM_018188.5	chr1	1439603	1441558	chr1	1445940	1448014	13	13	20	0.65	8.45	7	1
chr12	14940000	15170000	ATF7IP	NM_001286514.2	chr12	14517986	14520342	chr12	15053119	15060224	3	3	119	0.0252101	0.0756303	8	1
chr12	14940000	15170000	ATF7IP	NM_001286515.2	chr12	14517986	14520342	chr12	15053119	15060224	3	3	119	0.0252101	0.0756303	8	1
chr12	14940000	15170000	ATF7IP	NM_018179.5	chr12	14517986	14520342	chr12	15053119	15060224	3	3	119	0.0252101	0.0756303	8	1
chr11	72895000	72925000	ATG16L2	NM_001318766.2	chr11	72522943	72528343	chr11	72895579	72899778	8	25	282	0.0886525	2.21631	7	2
chr11	72895000	72925000	ATG16L2	NM_001318766.2	chr11	72522943	72528343	chr11	72900568	72909187	17	25	282	0.0886525	2.21631	7	1
chr11	72895000	72925000	ATG16L2	NM_033388.2	chr11	72522943	72528343	chr11	72895579	72899778	8	25	282	0.0886525	2.21631	7	2
chr11	72895000	72925000	ATG16L2	NM_033388.2	chr11	72522943	72528343	chr11	72900568	72909187	17	25	282	0.0886525	2.21631	7	1
chr11	65270000	65290000	ATG2A	NM_001367971.1	chr11	64683226	64686588	chr11	65263078	65280458	8	8	112	0.0714286	0.571429	31	1
chr11	65270000	65290000	ATG2A	NM_001367972.1	chr11	64683226	64686588	chr11	65263078	65280458	8	8	112	0.0714286	0.571429	31	1
chr11	65270000	65290000	ATG2A	NM_015104.3	chr11	64683226	64686588	chr11	65263078	65280458	8	8	112	0.0714286	0.571429	31	1
chr10	9050000	9230000	ATP5F1C	NM_001001973.3	chr10	7828683	7831717	chr10	9107152	9112395	4	25	96	0.260417	6.51042	2	3
chr10	9050000	9230000	ATP5F1C	NM_001001973.3	chr10	7828683	7831717	chr10	9150447	9155106	6	25	96	0.260417	6.51042	2	2
chr10	9050000	9230000	ATP5F1C	NM_001001973.3	chr10	7828683	7831717	chr10	9227901	9231137	15	25	96	0.260417	6.51042	2	1
chr10	9050000	9230000	ATP5F1C	NM_001320886.2	chr10	7828683	7831717	chr10	9107152	9112395	4	25	96	0.260417	6.51042	2	3
chr10	9050000	9230000	ATP5F1C	NM_001320886.2	chr10	7828683	7831717	chr10	9150447	9155106	6	25	96	0.260417	6.51042	2	2
chr10	9050000	9230000	ATP5F1C	NM_001320886.2	chr10	7828683	7831717	chr10	9227901	9231137	15	25	96	0.260417	6.51042	2	1
chr10	9050000	9230000	ATP5F1C	NM_005174.4	chr10	7828683	7831717	chr10	9107152	9112395	4	25	96	0.260417	6.51042	2	3
chr10	9050000	9230000	ATP5F1C	NM_005174.4	chr10	7828683	7831717	chr10	9150447	9155106	6	25	96	0.260417	6.51042	2	2
chr10	9050000	9230000	ATP5F1C	NM_005174.4	chr10	7828683	7831717	chr10	9227901	9231137	15	25	96	0.260417	6.51042	2	1
chr1	1215000	1460000	AURKAIP1	NM_001127229.2	chr1	1249198	1252080	chr1	1309478	1312976	7	53	65	0.815385	43.2154	2	3
chr1	1215000	1460000	AURKAIP1	NM_001127229.2	chr1	1253011	1254726	chr1	1309478	1312976	13	53	65	0.815385	43.2154	2	2
chr1	1215000	1460000	AURKAIP1	NM_001127229.2	chr1	1299220	1300367	chr1	1309478	1312976	27	53	65	0.815385	43.2154	2	1
chr1	1215000	1460000	AURKAIP1	NM_001127229.2	chr1	1309478	1312976	chr1	1439603	1441558	6	53	65	0.815385	43.2154	2	4
chr1	1215000	1460000	AURKAIP1	NM_001127230.2	chr1	1299220	1300367	chr1	1309478	1312976	27	53	65	0.815385	43.2154	2	1
chr1	1215000	1460000	AURKAIP1	NM_001127230.2	chr1	1249198	1252080	chr1	1309478	1312976	7	53	65	0.815385	43.2154	2	3
chr1	1215000	1460000	AURKAIP1	NM_001127230.2	chr1	1253011	1254726	chr1	1309478	1312976	13	53	65	0.815385	43.2154	2	2
chr1	1215000	1460000	AURKAIP1	NM_001127230.2	chr1	1309478	1312976	chr1	1439603	1441558	6	53	65	0.815385	43.2154	2	4
chr1	1215000	1460000	AURKAIP1	NM_017900.3	chr1	1249198	1252080	chr1	1309478	1312976	7	53	65	0.815385	43.2154	2	3
chr1	1215000	1460000	AURKAIP1	NM_017900.3	chr1	1253011	1254726	chr1	1309478	1312976	13	53	65	0.815385	43.2154	2	2
chr1	1215000	1460000	AURKAIP1	NM_017900.3	chr1	1299220	1300367	chr1	1309478	1312976	27	53	65	0.815385	43.2154	2	1
chr1	1215000	1460000	AURKAIP1	NM_017900.3	chr1	1309478	1312976	chr1	1439603	1441558	6	53	65	0.815385	43.2154	2	4
chr1	234650000	234790000	B3GALNT2	NM_001277155.3	chr1	234664999	234672711	chr1	235665807	235669173	3	3	22	0.136364	0.409091	5	1
chr1	234650000	234790000	B3GALNT2	NM_152490.5	chr1	234664999	234672711	chr1	235665807	235669173	3	3	22	0.136364	0.409091	5	1
chr1	235120000	235300000	B3GALNT2	NM_001277155.3	chr1	235122068	235127606	chr1	235665807	235669173	3	3	22	0.136364	0.409091	4	1
chr1	235120000	235300000	B3GALNT2	NM_152490.5	chr1	235122068	235127606	chr1	235665807	235669173	3	3	22	0.136364	0.409091	4	1
chr19	17395000	17455000	BABAM1	NM_001033549.3	chr19	17375020	17380222	chr19	17399998	17407884	8	8	8	1	8	3	1
chr19	17395000	17455000	BABAM1	NM_001288756.2	chr19	17375020	17380222	chr19	17399998	17407884	8	8	8	1	8	3	1
chr19	17395000	17455000	BABAM1	NM_001288757.2	chr19	17375020	17380222	chr19	17399998	17407884	8	8	8	1	8	3	1
chr19	17395000	17455000	BABAM1	NM_014173.4	chr19	17375020	17380222	chr19	17399998	17407884	8	8	8	1	8	3	1
chr11	65270000	65290000	BANF1	NM_001143985.1	chr11	65263078	65280458	chr11	65768893	65771593	12	12	171	0.0701754	0.842105	28	1
chr11	65270000	65290000	BANF1	NM_003860.4	chr11	65263078	65280458	chr11	65768893	65771593	12	12	171	0.0701754	0.842105	28	1
chr11	65270000	65290000	BATF2	NM_138456.4	chr11	64763942	64765352	chr11	65263078	65280458	3	3	3	1	3	10	1
chr14	35820000	35895000	BAZ1A	NM_013448.3	chr14	35341578	35344759	chr14	35821053	35826241	3	11	127	0.0866142	0.952756	5	2
chr14	35820000	35895000	BAZ1A	NM_013448.3	chr14	35341578	35344759	chr14	35834314	35837245	3	11	127	0.0866142	0.952756	5	2
chr14	35820000	35895000	BAZ1A	NM_013448.3	chr14	35341578	35344759	chr14	35859468	35860897	5	11	127	0.0866142	0.952756	5	1
chr14	35820000	35895000	BAZ1A	NM_182648.2	chr14	35341578	35344759	chr14	35821053	35826241	3	11	127	0.0866142	0.952756	5	2
chr14	35820000	35895000	BAZ1A	NM_182648.2	chr14	35341578	35344759	chr14	35834314	35837245	3	11	127	0.0866142	0.952756	5	2
chr14	35820000	35895000	BAZ1A	NM_182648.2	chr14	35341578	35344759	chr14	35859468	35860897	5	11	127	0.0866142	0.952756	5	1
chr17	57855000	58625000	BCAS3	NM_001099432.3	chr17	58216580	58217949	chr17	58753898	58757275	7	267	545	0.489908	130.806	10	6
chr17	57855000	58625000	BCAS3	NM_001099432.3	chr17	58447897	58451495	chr17	58753898	58757275	14	267	545	0.489908	130.806	10	3
chr17	57855000	58625000	BCAS3	NM_001099432.3	chr17	58244094	58246096	chr17	58753898	58757275	6	267	545	0.489908	130.806	10	7
chr17	57855000	58625000	BCAS3	NM_001099432.3	chr17	58211415	58213749	chr17	58753898	58757275	7	267	545	0.489908	130.806	10	6
chr17	57855000	58625000	BCAS3	NM_001099432.3	chr17	58238410	58242905	chr17	58753898	58757275	4	267	545	0.489908	130.806	10	9
chr17	57855000	58625000	BCAS3	NM_001099432.3	chr17	58391741	58394650	chr17	58753898	58757275	3	267	545	0.489908	130.806	10	10
chr17	57855000	58625000	BCAS3	NM_001099432.3	chr17	58218394	58221266	chr17	58753898	58757275	3	267	545	0.489908	130.806	10	10
chr17	57855000	58625000	BCAS3	NM_001099432.3	chr17	58231274	58234451	chr17	58753898	58757275	5	267	545	0.489908	130.806	10	8
chr17	57855000	58625000	BCAS3	NM_001099432.3	chr17	58307412	58309337	chr17	58753898	58757275	5	267	545	0.489908	130.806	10	8
chr17	57855000	58625000	BCAS3	NM_001099432.3	chr17	58164123	58167274	chr17	58753898	58757275	6	267	545	0.489908	130.806	10	7
chr17	57855000	58625000	BCAS3	NM_001099432.3	chr17	58167891	58171580	chr17	58753898	58757275	10	267	545	0.489908	130.806	10	4
chr17	57855000	58625000	BCAS3	NM_001099432.3	chr17	58251468	58253240	chr17	58753898	58757275	3	267	545	0.489908	130.806	10	10
chr17	57855000	58625000	BCAS3	NM_001099432.3	chr17	58429026	58436775	chr17	58753898	58757275	16	267	545	0.489908	130.806	10	2
chr17	57855000	58625000	BCAS3	NM_001099432.3	chr17	58497978	58499334	chr17	58753898	58757275	4	267	545	0.489908	130.806	10	9
chr17	57855000	58625000	BCAS3	NM_001099432.3	chr17	58519776	58522036	chr17	58753898	58757275	5	267	545	0.489908	130.806	10	8
chr17	57855000	58625000	BCAS3	NM_001099432.3	chr17	58459054	58460384	chr17	58753898	58757275	6	267	545	0.489908	130.806	10	7
chr17	57855000	58625000	BCAS3	NM_001099432.3	chr17	58493436	58494628	chr17	58753898	58757275	5	267	545	0.489908	130.806	10	8
chr17	57855000	58625000	BCAS3	NM_001099432.3	chr17	58113537	58117893	chr17	58753898	58757275	8	267	545	0.489908	130.806	10	5
chr17	57855000	58625000	BCAS3	NM_001099432.3	chr17	58419321	58420597	chr17	58753898	58757275	3	267	545	0.489908	130.806	10	10
chr17	57855000	58625000	BCAS3	NM_001099432.3	chr17	58247087	58249980	chr17	58753898	58757275	6	267	545	0.489908	130.806	10	7
chr17	57855000	58625000	BCAS3	NM_001099432.3	chr17	58557684	58559095	chr17	58753898	58757275	10	267	545	0.489908	130.806	10	4
chr17	57855000	58625000	BCAS3	NM_001099432.3	chr17	58422067	58424935	chr17	58753898	58757275	6	267	545	0.489908	130.806	10	7
chr17	57855000	58625000	BCAS3	NM_001099432.3	chr17	57898568	57951001	chr17	58753898	58757275	120	267	545	0.489908	130.806	10	1
chr17	57855000	58625000	BCAS3	NM_001099432.3	chr17	58546637	58548214	chr17	58753898	58757275	5	267	545	0.489908	130.806	10	8
chr17	57855000	58625000	BCAS3	NM_001320470.3	chr17	58164123	58167274	chr17	58753898	58757275	6	267	545	0.489908	130.806	10	7
chr17	57855000	58625000	BCAS3	NM_001320470.3	chr17	58113537	58117893	chr17	58753898	58757275	8	267	545	0.489908	130.806	10	5
chr17	57855000	58625000	BCAS3	NM_001320470.3	chr17	58459054	58460384	chr17	58753898	58757275	6	267	545	0.489908	130.806	10	7
chr17	57855000	58625000	BCAS3	NM_001320470.3	chr17	58493436	58494628	chr17	58753898	58757275	5	267	545	0.489908	130.806	10	8
chr17	57855000	58625000	BCAS3	NM_001320470.3	chr17	58546637	58548214	chr17	58753898	58757275	5	267	545	0.489908	130.806	10	8
chr17	57855000	58625000	BCAS3	NM_001320470.3	chr17	58557684	58559095	chr17	58753898	58757275	10	267	545	0.489908	130.806	10	4
chr17	57855000	58625000	BCAS3	NM_001320470.3	chr17	58247087	58249980	chr17	58753898	58757275	6	267	545	0.489908	130.806	10	7
chr17	57855000	58625000	BCAS3	NM_001320470.3	chr17	58419321	58420597	chr17	58753898	58757275	3	267	545	0.489908	130.806	10	10
chr17	57855000	58625000	BCAS3	NM_001320470.3	chr17	57898568	57951001	chr17	58753898	58757275	120	267	545	0.489908	130.806	10	1
chr17	57855000	58625000	BCAS3	NM_001320470.3	chr17	58307412	58309337	chr17	58753898	58757275	5	267	545	0.489908	130.806	10	8
chr17	57855000	58625000	BCAS3	NM_001320470.3	chr17	58391741	58394650	chr17	58753898	58757275	3	267	545	0.489908	130.806	10	10
chr17	57855000	58625000	BCAS3	NM_001320470.3	chr17	58429026	58436775	chr17	58753898	58757275	16	267	545	0.489908	130.806	10	2
chr17	57855000	58625000	BCAS3	NM_001320470.3	chr17	58519776	58522036	chr17	58753898	58757275	5	267	545	0.489908	130.806	10	8
chr17	57855000	58625000	BCAS3	NM_001320470.3	chr17	58238410	58242905	chr17	58753898	58757275	4	267	545	0.489908	130.806	10	9
chr17	57855000	58625000	BCAS3	NM_001320470.3	chr17	58447897	58451495	chr17	58753898	58757275	14	267	545	0.489908	130.806	10	3
chr17	57855000	58625000	BCAS3	NM_001320470.3	chr17	58231274	58234451	chr17	58753898	58757275	5	267	545	0.489908	130.806	10	8
chr17	57855000	58625000	BCAS3	NM_001320470.3	chr17	58251468	58253240	chr17	58753898	58757275	3	267	545	0.489908	130.806	10	10
chr17	57855000	58625000	BCAS3	NM_001320470.3	chr17	58244094	58246096	chr17	58753898	58757275	6	267	545	0.489908	130.806	10	7
chr17	57855000	58625000	BCAS3	NM_001320470.3	chr17	58218394	58221266	chr17	58753898	58757275	3	267	545	0.489908	130.806	10	10
chr17	57855000	58625000	BCAS3	NM_001320470.3	chr17	58422067	58424935	chr17	58753898	58757275	6	267	545	0.489908	130.806	10	7
chr17	57855000	58625000	BCAS3	NM_001320470.3	chr17	58167891	58171580	chr17	58753898	58757275	10	267	545	0.489908	130.806	10	4
chr17	57855000	58625000	BCAS3	NM_001320470.3	chr17	58216580	58217949	chr17	58753898	58757275	7	267	545	0.489908	130.806	10	6
chr17	57855000	58625000	BCAS3	NM_001320470.3	chr17	58211415	58213749	chr17	58753898	58757275	7	267	545	0.489908	130.806	10	6
chr17	57855000	58625000	BCAS3	NM_001320470.3	chr17	58497978	58499334	chr17	58753898	58757275	4	267	545	0.489908	130.806	10	9
chr17	57855000	58625000	BCAS3	NM_001330413.2	chr17	58216580	58217949	chr17	58753898	58757275	7	267	545	0.489908	130.806	10	6
chr17	57855000	58625000	BCAS3	NM_001330413.2	chr17	58167891	58171580	chr17	58753898	58757275	10	267	545	0.489908	130.806	10	4
chr17	57855000	58625000	BCAS3	NM_001330413.2	chr17	58211415	58213749	chr17	58753898	58757275	7	267	545	0.489908	130.806	10	6
chr17	57855000	58625000	BCAS3	NM_001330413.2	chr17	57898568	57951001	chr17	58753898	58757275	120	267	545	0.489908	130.806	10	1
chr17	57855000	58625000	BCAS3	NM_001330413.2	chr17	58113537	58117893	chr17	58753898	58757275	8	267	545	0.489908	130.806	10	5
chr17	57855000	58625000	BCAS3	NM_001330413.2	chr17	58164123	58167274	chr17	58753898	58757275	6	267	545	0.489908	130.806	10	7
chr17	57855000	58625000	BCAS3	NM_001330413.2	chr17	58238410	58242905	chr17	58753898	58757275	4	267	545	0.489908	130.806	10	9
chr17	57855000	58625000	BCAS3	NM_001330413.2	chr17	58447897	58451495	chr17	58753898	58757275	14	267	545	0.489908	130.806	10	3
chr17	57855000	58625000	BCAS3	NM_001330413.2	chr17	58459054	58460384	chr17	58753898	58757275	6	267	545	0.489908	130.806	10	7
chr17	57855000	58625000	BCAS3	NM_001330413.2	chr17	58218394	58221266	chr17	58753898	58757275	3	267	545	0.489908	130.806	10	10
chr17	57855000	58625000	BCAS3	NM_001330413.2	chr17	58429026	58436775	chr17	58753898	58757275	16	267	545	0.489908	130.806	10	2
chr17	57855000	58625000	BCAS3	NM_001330413.2	chr17	58519776	58522036	chr17	58753898	58757275	5	267	545	0.489908	130.806	10	8
chr17	57855000	58625000	BCAS3	NM_001330413.2	chr17	58244094	58246096	chr17	58753898	58757275	6	267	545	0.489908	130.806	10	7
chr17	57855000	58625000	BCAS3	NM_001330413.2	chr17	58391741	58394650	chr17	58753898	58757275	3	267	545	0.489908	130.806	10	10
chr17	57855000	58625000	BCAS3	NM_001330413.2	chr17	58247087	58249980	chr17	58753898	58757275	6	267	545	0.489908	130.806	10	7
chr17	57855000	58625000	BCAS3	NM_001330413.2	chr17	58251468	58253240	chr17	58753898	58757275	3	267	545	0.489908	130.806	10	10
chr17	57855000	58625000	BCAS3	NM_001330413.2	chr17	58307412	58309337	chr17	58753898	58757275	5	267	545	0.489908	130.806	10	8
chr17	57855000	58625000	BCAS3	NM_001330413.2	chr17	58546637	58548214	chr17	58753898	58757275	5	267	545	0.489908	130.806	10	8
chr17	57855000	58625000	BCAS3	NM_001330413.2	chr17	58419321	58420597	chr17	58753898	58757275	3	267	545	0.489908	130.806	10	10
chr17	57855000	58625000	BCAS3	NM_001330413.2	chr17	58422067	58424935	chr17	58753898	58757275	6	267	545	0.489908	130.806	10	7
chr17	57855000	58625000	BCAS3	NM_001330413.2	chr17	58231274	58234451	chr17	58753898	58757275	5	267	545	0.489908	130.806	10	8
chr17	57855000	58625000	BCAS3	NM_001330413.2	chr17	58557684	58559095	chr17	58753898	58757275	10	267	545	0.489908	130.806	10	4
chr17	57855000	58625000	BCAS3	NM_001330413.2	chr17	58497978	58499334	chr17	58753898	58757275	4	267	545	0.489908	130.806	10	9
chr17	57855000	58625000	BCAS3	NM_001330413.2	chr17	58493436	58494628	chr17	58753898	58757275	5	267	545	0.489908	130.806	10	8
chr17	57855000	58625000	BCAS3	NM_001330414.2	chr17	58519776	58522036	chr17	58753898	58757275	5	267	545	0.489908	130.806	10	8
chr17	57855000	58625000	BCAS3	NM_001330414.2	chr17	58497978	58499334	chr17	58753898	58757275	4	267	545	0.489908	130.806	10	9
chr17	57855000	58625000	BCAS3	NM_001330414.2	chr17	58307412	58309337	chr17	58753898	58757275	5	267	545	0.489908	130.806	10	8
chr17	57855000	58625000	BCAS3	NM_001330414.2	chr17	58459054	58460384	chr17	58753898	58757275	6	267	545	0.489908	130.806	10	7
chr17	57855000	58625000	BCAS3	NM_001330414.2	chr17	58247087	58249980	chr17	58753898	58757275	6	267	545	0.489908	130.806	10	7
chr17	57855000	58625000	BCAS3	NM_001330414.2	chr17	58244094	58246096	chr17	58753898	58757275	6	267	545	0.489908	130.806	10	7
chr17	57855000	58625000	BCAS3	NM_001330414.2	chr17	58429026	58436775	chr17	58753898	58757275	16	267	545	0.489908	130.806	10	2
chr17	57855000	58625000	BCAS3	NM_001330414.2	chr17	58391741	58394650	chr17	58753898	58757275	3	267	545	0.489908	130.806	10	10
chr17	57855000	58625000	BCAS3	NM_001330414.2	chr17	58493436	58494628	chr17	58753898	58757275	5	267	545	0.489908	130.806	10	8
chr17	57855000	58625000	BCAS3	NM_001330414.2	chr17	58422067	58424935	chr17	58753898	58757275	6	267	545	0.489908	130.806	10	7
chr17	57855000	58625000	BCAS3	NM_001330414.2	chr17	58211415	58213749	chr17	58753898	58757275	7	267	545	0.489908	130.806	10	6
chr17	57855000	58625000	BCAS3	NM_001330414.2	chr17	58216580	58217949	chr17	58753898	58757275	7	267	545	0.489908	130.806	10	6
chr17	57855000	58625000	BCAS3	NM_001330414.2	chr17	58167891	58171580	chr17	58753898	58757275	10	267	545	0.489908	130.806	10	4
chr17	57855000	58625000	BCAS3	NM_001330414.2	chr17	58231274	58234451	chr17	58753898	58757275	5	267	545	0.489908	130.806	10	8
chr17	57855000	58625000	BCAS3	NM_001330414.2	chr17	58251468	58253240	chr17	58753898	58757275	3	267	545	0.489908	130.806	10	10
chr17	57855000	58625000	BCAS3	NM_001330414.2	chr17	58447897	58451495	chr17	58753898	58757275	14	267	545	0.489908	130.806	10	3
chr17	57855000	58625000	BCAS3	NM_001330414.2	chr17	58419321	58420597	chr17	58753898	58757275	3	267	545	0.489908	130.806	10	10
chr17	57855000	58625000	BCAS3	NM_001330414.2	chr17	57898568	57951001	chr17	58753898	58757275	120	267	545	0.489908	130.806	10	1
chr17	57855000	58625000	BCAS3	NM_001330414.2	chr17	58113537	58117893	chr17	58753898	58757275	8	267	545	0.489908	130.806	10	5
chr17	57855000	58625000	BCAS3	NM_001330414.2	chr17	58238410	58242905	chr17	58753898	58757275	4	267	545	0.489908	130.806	10	9
chr17	57855000	58625000	BCAS3	NM_001330414.2	chr17	58218394	58221266	chr17	58753898	58757275	3	267	545	0.489908	130.806	10	10
chr17	57855000	58625000	BCAS3	NM_001330414.2	chr17	58164123	58167274	chr17	58753898	58757275	6	267	545	0.489908	130.806	10	7
chr17	57855000	58625000	BCAS3	NM_001330414.2	chr17	58546637	58548214	chr17	58753898	58757275	5	267	545	0.489908	130.806	10	8
chr17	57855000	58625000	BCAS3	NM_001330414.2	chr17	58557684	58559095	chr17	58753898	58757275	10	267	545	0.489908	130.806	10	4
chr17	57855000	58625000	BCAS3	NM_001353144.2	chr17	58419321	58420597	chr17	58753898	58757275	3	267	545	0.489908	130.806	10	10
chr17	57855000	58625000	BCAS3	NM_001353144.2	chr17	58231274	58234451	chr17	58753898	58757275	5	267	545	0.489908	130.806	10	8
chr17	57855000	58625000	BCAS3	NM_001353144.2	chr17	58244094	58246096	chr17	58753898	58757275	6	267	545	0.489908	130.806	10	7
chr17	57855000	58625000	BCAS3	NM_001353144.2	chr17	58247087	58249980	chr17	58753898	58757275	6	267	545	0.489908	130.806	10	7
chr17	57855000	58625000	BCAS3	NM_001353144.2	chr17	58211415	58213749	chr17	58753898	58757275	7	267	545	0.489908	130.806	10	6
chr17	57855000	58625000	BCAS3	NM_001353144.2	chr17	58113537	58117893	chr17	58753898	58757275	8	267	545	0.489908	130.806	10	5
chr17	57855000	58625000	BCAS3	NM_001353144.2	chr17	57898568	57951001	chr17	58753898	58757275	120	267	545	0.489908	130.806	10	1
chr17	57855000	58625000	BCAS3	NM_001353144.2	chr17	58167891	58171580	chr17	58753898	58757275	10	267	545	0.489908	130.806	10	4
chr17	57855000	58625000	BCAS3	NM_001353144.2	chr17	58519776	58522036	chr17	58753898	58757275	5	267	545	0.489908	130.806	10	8
chr17	57855000	58625000	BCAS3	NM_001353144.2	chr17	58216580	58217949	chr17	58753898	58757275	7	267	545	0.489908	130.806	10	6
chr17	57855000	58625000	BCAS3	NM_001353144.2	chr17	58164123	58167274	chr17	58753898	58757275	6	267	545	0.489908	130.806	10	7
chr17	57855000	58625000	BCAS3	NM_001353144.2	chr17	58429026	58436775	chr17	58753898	58757275	16	267	545	0.489908	130.806	10	2
chr17	57855000	58625000	BCAS3	NM_001353144.2	chr17	58546637	58548214	chr17	58753898	58757275	5	267	545	0.489908	130.806	10	8
chr17	57855000	58625000	BCAS3	NM_001353144.2	chr17	58238410	58242905	chr17	58753898	58757275	4	267	545	0.489908	130.806	10	9
chr17	57855000	58625000	BCAS3	NM_001353144.2	chr17	58391741	58394650	chr17	58753898	58757275	3	267	545	0.489908	130.806	10	10
chr17	57855000	58625000	BCAS3	NM_001353144.2	chr17	58493436	58494628	chr17	58753898	58757275	5	267	545	0.489908	130.806	10	8
chr17	57855000	58625000	BCAS3	NM_001353144.2	chr17	58447897	58451495	chr17	58753898	58757275	14	267	545	0.489908	130.806	10	3
chr17	57855000	58625000	BCAS3	NM_001353144.2	chr17	58459054	58460384	chr17	58753898	58757275	6	267	545	0.489908	130.806	10	7
chr17	57855000	58625000	BCAS3	NM_001353144.2	chr17	58422067	58424935	chr17	58753898	58757275	6	267	545	0.489908	130.806	10	7
chr17	57855000	58625000	BCAS3	NM_001353144.2	chr17	58307412	58309337	chr17	58753898	58757275	5	267	545	0.489908	130.806	10	8
chr17	57855000	58625000	BCAS3	NM_001353144.2	chr17	58497978	58499334	chr17	58753898	58757275	4	267	545	0.489908	130.806	10	9
chr17	57855000	58625000	BCAS3	NM_001353144.2	chr17	58218394	58221266	chr17	58753898	58757275	3	267	545	0.489908	130.806	10	10
chr17	57855000	58625000	BCAS3	NM_001353144.2	chr17	58557684	58559095	chr17	58753898	58757275	10	267	545	0.489908	130.806	10	4
chr17	57855000	58625000	BCAS3	NM_001353144.2	chr17	58251468	58253240	chr17	58753898	58757275	3	267	545	0.489908	130.806	10	10
chr17	57855000	58625000	BCAS3	NM_001353145.2	chr17	58218394	58221266	chr17	58753898	58757275	3	267	545	0.489908	130.806	10	10
chr17	57855000	58625000	BCAS3	NM_001353145.2	chr17	58459054	58460384	chr17	58753898	58757275	6	267	545	0.489908	130.806	10	7
chr17	57855000	58625000	BCAS3	NM_001353145.2	chr17	58419321	58420597	chr17	58753898	58757275	3	267	545	0.489908	130.806	10	10
chr17	57855000	58625000	BCAS3	NM_001353145.2	chr17	58216580	58217949	chr17	58753898	58757275	7	267	545	0.489908	130.806	10	6
chr17	57855000	58625000	BCAS3	NM_001353145.2	chr17	58164123	58167274	chr17	58753898	58757275	6	267	545	0.489908	130.806	10	7
chr17	57855000	58625000	BCAS3	NM_001353145.2	chr17	58167891	58171580	chr17	58753898	58757275	10	267	545	0.489908	130.806	10	4
chr17	57855000	58625000	BCAS3	NM_001353145.2	chr17	58211415	58213749	chr17	58753898	58757275	7	267	545	0.489908	130.806	10	6
chr17	57855000	58625000	BCAS3	NM_001353145.2	chr17	58447897	58451495	chr17	58753898	58757275	14	267	545	0.489908	130.806	10	3
chr17	57855000	58625000	BCAS3	NM_001353145.2	chr17	58238410	58242905	chr17	58753898	58757275	4	267	545	0.489908	130.806	10	9
chr17	57855000	58625000	BCAS3	NM_001353145.2	chr17	58244094	58246096	chr17	58753898	58757275	6	267	545	0.489908	130.806	10	7
chr17	57855000	58625000	BCAS3	NM_001353145.2	chr17	58247087	58249980	chr17	58753898	58757275	6	267	545	0.489908	130.806	10	7
chr17	57855000	58625000	BCAS3	NM_001353145.2	chr17	58231274	58234451	chr17	58753898	58757275	5	267	545	0.489908	130.806	10	8
chr17	57855000	58625000	BCAS3	NM_001353145.2	chr17	58307412	58309337	chr17	58753898	58757275	5	267	545	0.489908	130.806	10	8
chr17	57855000	58625000	BCAS3	NM_001353145.2	chr17	58391741	58394650	chr17	58753898	58757275	3	267	545	0.489908	130.806	10	10
chr17	57855000	58625000	BCAS3	NM_001353145.2	chr17	58251468	58253240	chr17	58753898	58757275	3	267	545	0.489908	130.806	10	10
chr17	57855000	58625000	BCAS3	NM_001353145.2	chr17	58429026	58436775	chr17	58753898	58757275	16	267	545	0.489908	130.806	10	2
chr17	57855000	58625000	BCAS3	NM_001353145.2	chr17	58422067	58424935	chr17	58753898	58757275	6	267	545	0.489908	130.806	10	7
chr17	57855000	58625000	BCAS3	NM_001353145.2	chr17	58113537	58117893	chr17	58753898	58757275	8	267	545	0.489908	130.806	10	5
chr17	57855000	58625000	BCAS3	NM_001353145.2	chr17	58546637	58548214	chr17	58753898	58757275	5	267	545	0.489908	130.806	10	8
chr17	57855000	58625000	BCAS3	NM_001353145.2	chr17	58493436	58494628	chr17	58753898	58757275	5	267	545	0.489908	130.806	10	8
chr17	57855000	58625000	BCAS3	NM_001353145.2	chr17	58497978	58499334	chr17	58753898	58757275	4	267	545	0.489908	130.806	10	9
chr17	57855000	58625000	BCAS3	NM_001353145.2	chr17	58519776	58522036	chr17	58753898	58757275	5	267	545	0.489908	130.806	10	8
chr17	57855000	58625000	BCAS3	NM_001353145.2	chr17	58557684	58559095	chr17	58753898	58757275	10	267	545	0.489908	130.806	10	4
chr17	57855000	58625000	BCAS3	NM_001353145.2	chr17	57898568	57951001	chr17	58753898	58757275	120	267	545	0.489908	130.806	10	1
chr17	57855000	58625000	BCAS3	NM_001353146.2	chr17	58497978	58499334	chr17	58753898	58757275	4	267	545	0.489908	130.806	10	9
chr17	57855000	58625000	BCAS3	NM_001353146.2	chr17	58113537	58117893	chr17	58753898	58757275	8	267	545	0.489908	130.806	10	5
chr17	57855000	58625000	BCAS3	NM_001353146.2	chr17	58167891	58171580	chr17	58753898	58757275	10	267	545	0.489908	130.806	10	4
chr17	57855000	58625000	BCAS3	NM_001353146.2	chr17	58422067	58424935	chr17	58753898	58757275	6	267	545	0.489908	130.806	10	7
chr17	57855000	58625000	BCAS3	NM_001353146.2	chr17	58211415	58213749	chr17	58753898	58757275	7	267	545	0.489908	130.806	10	6
chr17	57855000	58625000	BCAS3	NM_001353146.2	chr17	58164123	58167274	chr17	58753898	58757275	6	267	545	0.489908	130.806	10	7
chr17	57855000	58625000	BCAS3	NM_001353146.2	chr17	58493436	58494628	chr17	58753898	58757275	5	267	545	0.489908	130.806	10	8
chr17	57855000	58625000	BCAS3	NM_001353146.2	chr17	58459054	58460384	chr17	58753898	58757275	6	267	545	0.489908	130.806	10	7
chr17	57855000	58625000	BCAS3	NM_001353146.2	chr17	58546637	58548214	chr17	58753898	58757275	5	267	545	0.489908	130.806	10	8
chr17	57855000	58625000	BCAS3	NM_001353146.2	chr17	58557684	58559095	chr17	58753898	58757275	10	267	545	0.489908	130.806	10	4
chr17	57855000	58625000	BCAS3	NM_001353146.2	chr17	58238410	58242905	chr17	58753898	58757275	4	267	545	0.489908	130.806	10	9
chr17	57855000	58625000	BCAS3	NM_001353146.2	chr17	58244094	58246096	chr17	58753898	58757275	6	267	545	0.489908	130.806	10	7
chr17	57855000	58625000	BCAS3	NM_001353146.2	chr17	58247087	58249980	chr17	58753898	58757275	6	267	545	0.489908	130.806	10	7
chr17	57855000	58625000	BCAS3	NM_001353146.2	chr17	57898568	57951001	chr17	58753898	58757275	120	267	545	0.489908	130.806	10	1
chr17	57855000	58625000	BCAS3	NM_001353146.2	chr17	58251468	58253240	chr17	58753898	58757275	3	267	545	0.489908	130.806	10	10
chr17	57855000	58625000	BCAS3	NM_001353146.2	chr17	58307412	58309337	chr17	58753898	58757275	5	267	545	0.489908	130.806	10	8
chr17	57855000	58625000	BCAS3	NM_001353146.2	chr17	58391741	58394650	chr17	58753898	58757275	3	267	545	0.489908	130.806	10	10
chr17	57855000	58625000	BCAS3	NM_001353146.2	chr17	58429026	58436775	chr17	58753898	58757275	16	267	545	0.489908	130.806	10	2
chr17	57855000	58625000	BCAS3	NM_001353146.2	chr17	58218394	58221266	chr17	58753898	58757275	3	267	545	0.489908	130.806	10	10
chr17	57855000	58625000	BCAS3	NM_001353146.2	chr17	58216580	58217949	chr17	58753898	58757275	7	267	545	0.489908	130.806	10	6
chr17	57855000	58625000	BCAS3	NM_001353146.2	chr17	58447897	58451495	chr17	58753898	58757275	14	267	545	0.489908	130.806	10	3
chr17	57855000	58625000	BCAS3	NM_001353146.2	chr17	58519776	58522036	chr17	58753898	58757275	5	267	545	0.489908	130.806	10	8
chr17	57855000	58625000	BCAS3	NM_001353146.2	chr17	58231274	58234451	chr17	58753898	58757275	5	267	545	0.489908	130.806	10	8
chr17	57855000	58625000	BCAS3	NM_001353146.2	chr17	58419321	58420597	chr17	58753898	58757275	3	267	545	0.489908	130.806	10	10
chr17	57855000	58625000	BCAS3	NM_017679.5	chr17	58244094	58246096	chr17	58753898	58757275	6	267	545	0.489908	130.806	10	7
chr17	57855000	58625000	BCAS3	NM_017679.5	chr17	58164123	58167274	chr17	58753898	58757275	6	267	545	0.489908	130.806	10	7
chr17	57855000	58625000	BCAS3	NM_017679.5	chr17	57898568	57951001	chr17	58753898	58757275	120	267	545	0.489908	130.806	10	1
chr17	57855000	58625000	BCAS3	NM_017679.5	chr17	58113537	58117893	chr17	58753898	58757275	8	267	545	0.489908	130.806	10	5
chr17	57855000	58625000	BCAS3	NM_017679.5	chr17	58218394	58221266	chr17	58753898	58757275	3	267	545	0.489908	130.806	10	10
chr17	57855000	58625000	BCAS3	NM_017679.5	chr17	58167891	58171580	chr17	58753898	58757275	10	267	545	0.489908	130.806	10	4
chr17	57855000	58625000	BCAS3	NM_017679.5	chr17	58211415	58213749	chr17	58753898	58757275	7	267	545	0.489908	130.806	10	6
chr17	57855000	58625000	BCAS3	NM_017679.5	chr17	58216580	58217949	chr17	58753898	58757275	7	267	545	0.489908	130.806	10	6
chr17	57855000	58625000	BCAS3	NM_017679.5	chr17	58247087	58249980	chr17	58753898	58757275	6	267	545	0.489908	130.806	10	7
chr17	57855000	58625000	BCAS3	NM_017679.5	chr17	58519776	58522036	chr17	58753898	58757275	5	267	545	0.489908	130.806	10	8
chr17	57855000	58625000	BCAS3	NM_017679.5	chr17	58251468	58253240	chr17	58753898	58757275	3	267	545	0.489908	130.806	10	10
chr17	57855000	58625000	BCAS3	NM_017679.5	chr17	58546637	58548214	chr17	58753898	58757275	5	267	545	0.489908	130.806	10	8
chr17	57855000	58625000	BCAS3	NM_017679.5	chr17	58391741	58394650	chr17	58753898	58757275	3	267	545	0.489908	130.806	10	10
chr17	57855000	58625000	BCAS3	NM_017679.5	chr17	58419321	58420597	chr17	58753898	58757275	3	267	545	0.489908	130.806	10	10
chr17	57855000	58625000	BCAS3	NM_017679.5	chr17	58422067	58424935	chr17	58753898	58757275	6	267	545	0.489908	130.806	10	7
chr17	57855000	58625000	BCAS3	NM_017679.5	chr17	58307412	58309337	chr17	58753898	58757275	5	267	545	0.489908	130.806	10	8
chr17	57855000	58625000	BCAS3	NM_017679.5	chr17	58459054	58460384	chr17	58753898	58757275	6	267	545	0.489908	130.806	10	7
chr17	57855000	58625000	BCAS3	NM_017679.5	chr17	58493436	58494628	chr17	58753898	58757275	5	267	545	0.489908	130.806	10	8
chr17	57855000	58625000	BCAS3	NM_017679.5	chr17	58231274	58234451	chr17	58753898	58757275	5	267	545	0.489908	130.806	10	8
chr17	57855000	58625000	BCAS3	NM_017679.5	chr17	58447897	58451495	chr17	58753898	58757275	14	267	545	0.489908	130.806	10	3
chr17	57855000	58625000	BCAS3	NM_017679.5	chr17	58238410	58242905	chr17	58753898	58757275	4	267	545	0.489908	130.806	10	9
chr17	57855000	58625000	BCAS3	NM_017679.5	chr17	58557684	58559095	chr17	58753898	58757275	10	267	545	0.489908	130.806	10	4
chr17	57855000	58625000	BCAS3	NM_017679.5	chr17	58497978	58499334	chr17	58753898	58757275	4	267	545	0.489908	130.806	10	9
chr17	57855000	58625000	BCAS3	NM_017679.5	chr17	58429026	58436775	chr17	58753898	58757275	16	267	545	0.489908	130.806	10	2
chr17	58695000	58705000	BCAS3	NM_001099432.3	chr17	58704142	58706039	chr17	58753898	58757275	23	23	545	0.0422018	0.970642	3	1
chr17	58695000	58705000	BCAS3	NM_001320470.3	chr17	58704142	58706039	chr17	58753898	58757275	23	23	545	0.0422018	0.970642	3	1
chr17	58695000	58705000	BCAS3	NM_001330413.2	chr17	58704142	58706039	chr17	58753898	58757275	23	23	545	0.0422018	0.970642	3	1
chr17	58695000	58705000	BCAS3	NM_001330414.2	chr17	58704142	58706039	chr17	58753898	58757275	23	23	545	0.0422018	0.970642	3	1
chr17	58695000	58705000	BCAS3	NM_001353144.2	chr17	58704142	58706039	chr17	58753898	58757275	23	23	545	0.0422018	0.970642	3	1
chr17	58695000	58705000	BCAS3	NM_001353145.2	chr17	58704142	58706039	chr17	58753898	58757275	23	23	545	0.0422018	0.970642	3	1
chr17	58695000	58705000	BCAS3	NM_001353146.2	chr17	58704142	58706039	chr17	58753898	58757275	23	23	545	0.0422018	0.970642	3	1
chr17	58695000	58705000	BCAS3	NM_017679.5	chr17	58704142	58706039	chr17	58753898	58757275	23	23	545	0.0422018	0.970642	3	1
chr20	48930000	48970000	BCAS4	NM_001010974.2	chr20	48918338	48933197	chr20	49402972	49412575	7	23	3078	0.00747238	0.171865	6	1
chr20	48930000	48970000	BCAS4	NM_001010974.2	chr20	48943869	48945324	chr20	49402972	49412575	3	23	3078	0.00747238	0.171865	6	3
chr20	48930000	48970000	BCAS4	NM_001010974.2	chr20	48946296	48952726	chr20	49402972	49412575	5	23	3078	0.00747238	0.171865	6	2
chr20	48930000	48970000	BCAS4	NM_001010974.2	chr20	48954956	48965215	chr20	49402972	49412575	5	23	3078	0.00747238	0.171865	6	2
chr20	48930000	48970000	BCAS4	NM_001010974.2	chr20	48965474	48966531	chr20	49402972	49412575	3	23	3078	0.00747238	0.171865	6	3
chr20	48930000	48970000	BCAS4	NM_017843.4	chr20	48918338	48933197	chr20	49402972	49412575	7	23	3078	0.00747238	0.171865	6	1
chr20	48930000	48970000	BCAS4	NM_017843.4	chr20	48943869	48945324	chr20	49402972	49412575	3	23	3078	0.00747238	0.171865	6	3
chr20	48930000	48970000	BCAS4	NM_017843.4	chr20	48946296	48952726	chr20	49402972	49412575	5	23	3078	0.00747238	0.171865	6	2
chr20	48930000	48970000	BCAS4	NM_017843.4	chr20	48954956	48965215	chr20	49402972	49412575	5	23	3078	0.00747238	0.171865	6	2
chr20	48930000	48970000	BCAS4	NM_017843.4	chr20	48965474	48966531	chr20	49402972	49412575	3	23	3078	0.00747238	0.171865	6	3
chr20	48930000	48970000	BCAS4	NM_198799.4	chr20	48918338	48933197	chr20	49402972	49412575	7	23	3078	0.00747238	0.171865	6	1
chr20	48930000	48970000	BCAS4	NM_198799.4	chr20	48943869	48945324	chr20	49402972	49412575	3	23	3078	0.00747238	0.171865	6	3
chr20	48930000	48970000	BCAS4	NM_198799.4	chr20	48946296	48952726	chr20	49402972	49412575	5	23	3078	0.00747238	0.171865	6	2
chr20	48930000	48970000	BCAS4	NM_198799.4	chr20	48954956	48965215	chr20	49402972	49412575	5	23	3078	0.00747238	0.171865	6	2
chr20	48930000	48970000	BCAS4	NM_198799.4	chr20	48965474	48966531	chr20	49402972	49412575	3	23	3078	0.00747238	0.171865	6	3
chr20	30700000	30715000	BCL2L1	NM_001191.4	chr20	30309523	30312887	chr20	30701720	30703104	3	3	481	0.00623701	0.018711	1	1
chr20	30700000	30715000	BCL2L1	NM_001317919.2	chr20	30309523	30312887	chr20	30701720	30703104	3	3	481	0.00623701	0.018711	1	1
chr20	30700000	30715000	BCL2L1	NM_001317920.2	chr20	30309523	30312887	chr20	30701720	30703104	3	3	481	0.00623701	0.018711	1	1
chr20	30700000	30715000	BCL2L1	NM_001317921.2	chr20	30309523	30312887	chr20	30701720	30703104	3	3	481	0.00623701	0.018711	1	1
chr20	30700000	30715000	BCL2L1	NM_001322239.2	chr20	30309523	30312887	chr20	30701720	30703104	3	3	481	0.00623701	0.018711	1	1
chr20	30700000	30715000	BCL2L1	NM_001322240.2	chr20	30309523	30312887	chr20	30701720	30703104	3	3	481	0.00623701	0.018711	1	1
chr20	30700000	30715000	BCL2L1	NM_001322242.2	chr20	30309523	30312887	chr20	30701720	30703104	3	3	481	0.00623701	0.018711	1	1
chr20	30700000	30715000	BCL2L1	NM_138578.3	chr20	30309523	30312887	chr20	30701720	30703104	3	3	481	0.00623701	0.018711	1	1
chr3	4735000	4805000	BHLHE40	NM_003670.3	chr3	4735754	4738405	chr3	5017360	5032929	11	227	631	0.359746	81.6624	1	4
chr3	4735000	4805000	BHLHE40	NM_003670.3	chr3	4742595	4744022	chr3	5017360	5032929	8	227	631	0.359746	81.6624	1	5
chr3	4735000	4805000	BHLHE40	NM_003670.3	chr3	4750778	4767098	chr3	5017360	5032929	113	227	631	0.359746	81.6624	1	1
chr3	4735000	4805000	BHLHE40	NM_003670.3	chr3	4769859	4779577	chr3	5017360	5032929	27	227	631	0.359746	81.6624	1	2
chr3	4735000	4805000	BHLHE40	NM_003670.3	chr3	4781983	4787102	chr3	5017360	5032929	27	227	631	0.359746	81.6624	1	2
chr3	4735000	4805000	BHLHE40	NM_003670.3	chr3	4787821	4788968	chr3	5017360	5032929	7	227	631	0.359746	81.6624	1	6
chr3	4735000	4805000	BHLHE40	NM_003670.3	chr3	4790046	4794949	chr3	5017360	5032929	17	227	631	0.359746	81.6624	1	3
chr3	4735000	4805000	BHLHE40	NM_003670.3	chr3	4796933	4800483	chr3	5017360	5032929	6	227	631	0.359746	81.6624	1	7
chr3	4735000	4805000	BHLHE40	NM_003670.3	chr3	4800975	4806003	chr3	5017360	5032929	11	227	631	0.359746	81.6624	1	4
chr11	102280000	102395000	BIRC2	NM_001166.4	chr11	102215888	102219395	chr11	102337737	102343372	6	10	10	1	10	2	1
chr11	102280000	102395000	BIRC2	NM_001166.4	chr11	102215888	102219395	chr11	102364405	102367377	4	10	10	1	10	2	2
chr11	102280000	102395000	BIRC2	NM_001256163.1	chr11	102215888	102219395	chr11	102337737	102343372	6	10	10	1	10	2	1
chr11	102280000	102395000	BIRC2	NM_001256163.1	chr11	102215888	102219395	chr11	102364405	102367377	4	10	10	1	10	2	2
chr11	102280000	102395000	BIRC2	NM_001256166.2	chr11	102215888	102219395	chr11	102337737	102343372	6	10	10	1	10	2	1
chr11	102280000	102395000	BIRC2	NM_001256166.2	chr11	102215888	102219395	chr11	102364405	102367377	4	10	10	1	10	2	2
chr17	57855000	58625000	BRIP1	NM_032043.3	chr17	58429026	58436775	chr17	59938473	59941552	4	7	307	0.0228013	0.159609	34	1
chr17	57855000	58625000	BRIP1	NM_032043.3	chr17	58113537	58117893	chr17	59938473	59941552	3	7	307	0.0228013	0.159609	34	2
chr11	65270000	65290000	C11orf68	NM_001135635.2	chr11	65263078	65280458	chr11	65682581	65689339	4	4	27	0.148148	0.592593	30	1
chr11	65270000	65290000	C11orf68	NM_031450.4	chr11	65263078	65280458	chr11	65682581	65689339	4	4	27	0.148148	0.592593	30	1
chr12	14940000	15170000	C12orf60	NM_175874.4	chr12	14954789	14957645	chr12	14997836	15000607	8	8	17	0.470588	3.76471	5	1
chr19	12960000	13275000	C19orf53	NM_014047.3	chr19	13270927	13276769	chr19	13882621	13901860	10	10	683	0.0146413	0.146413	22	1
chr1	155040000	155155000	C1orf43	NM_001098616.3	chr1	154191978	154195539	chr1	155044748	155046810	3	3	106	0.0283019	0.0849057	16	1
chr1	155040000	155155000	C1orf43	NM_001297717.2	chr1	154191978	154195539	chr1	155044748	155046810	3	3	106	0.0283019	0.0849057	16	1
chr1	155040000	155155000	C1orf43	NM_001297718.2	chr1	154191978	154195539	chr1	155044748	155046810	3	3	106	0.0283019	0.0849057	16	1
chr1	155040000	155155000	C1orf43	NM_001297720.2	chr1	154191978	154195539	chr1	155044748	155046810	3	3	106	0.0283019	0.0849057	16	1
chr1	155040000	155155000	C1orf43	NM_001297721.2	chr1	154191978	154195539	chr1	155044748	155046810	3	3	106	0.0283019	0.0849057	16	1
chr1	155040000	155155000	C1orf43	NM_001297723.2	chr1	154191978	154195539	chr1	155044748	155046810	3	3	106	0.0283019	0.0849057	16	1
chr1	155040000	155155000	C1orf43	NM_015449.4	chr1	154191978	154195539	chr1	155044748	155046810	3	3	106	0.0283019	0.0849057	16	1
chr1	155040000	155155000	C1orf43	NM_138740.4	chr1	154191978	154195539	chr1	155044748	155046810	3	3	106	0.0283019	0.0849057	16	1
chr2	85770000	85865000	C2orf68	NM_001013649.4	chr2	85772489	85780109	chr2	85834357	85840021	11	63	82	0.768293	48.4024	5	2
chr2	85770000	85865000	C2orf68	NM_001013649.4	chr2	85815304	85821080	chr2	85834357	85840021	52	63	82	0.768293	48.4024	5	1
chr17	57855000	58625000	CA4	NM_000717.5	chr17	57898568	57951001	chr17	58226989	58228477	21	21	21	1	21	17	1
chr10	5580000	5615000	CALML3	NM_005185.4	chr10	5566260	5571261	chr10	5585923	5594543	204	216	409	0.528117	114.073	2	1
chr10	5580000	5615000	CALML3	NM_005185.4	chr10	5566260	5571261	chr10	5594844	5598238	12	216	409	0.528117	114.073	2	2
chr10	5580000	5615000	CALML5	NM_017422.5	chr10	5537110	5547517	chr10	5580099	5581640	30	614	1917	0.320292	196.659	1	3
chr10	5580000	5615000	CALML5	NM_017422.5	chr10	5537110	5547517	chr10	5605158	5606477	11	614	1917	0.320292	196.659	1	4
chr10	5580000	5615000	CALML5	NM_017422.5	chr10	5537110	5547517	chr10	5585923	5594543	505	614	1917	0.320292	196.659	1	1
chr10	5580000	5615000	CALML5	NM_017422.5	chr10	5537110	5547517	chr10	5594844	5598238	60	614	1917	0.320292	196.659	1	2
chr10	5580000	5615000	CALML5	NM_017422.5	chr10	5537110	5547517	chr10	5601255	5602515	8	614	1917	0.320292	196.659	1	5
chr10	5670000	5735000	CALML5	NM_017422.5	chr10	5537110	5547517	chr10	5669951	5672466	8	47	1917	0.0245175	1.15232	4	2
chr10	5670000	5735000	CALML5	NM_017422.5	chr10	5537110	5547517	chr10	5673519	5675971	12	47	1917	0.0245175	1.15232	4	1
chr10	5670000	5735000	CALML5	NM_017422.5	chr10	5537110	5547517	chr10	5686731	5694939	12	47	1917	0.0245175	1.15232	4	1
chr10	5670000	5735000	CALML5	NM_017422.5	chr10	5537110	5547517	chr10	5695882	5697015	7	47	1917	0.0245175	1.15232	4	3
chr10	5670000	5735000	CALML5	NM_017422.5	chr10	5537110	5547517	chr10	5697986	5699608	4	47	1917	0.0245175	1.15232	4	4
chr10	5670000	5735000	CALML5	NM_017422.5	chr10	5537110	5547517	chr10	5700589	5702628	4	47	1917	0.0245175	1.15232	4	4
chr10	5785000	5805000	CALML5	NM_017422.5	chr10	5537110	5547517	chr10	5789836	5792743	3	3	1917	0.00156495	0.00469484	2	1
chr19	12960000	13275000	CALR	NM_004343.4	chr19	12975158	12980310	chr19	13040830	13068614	14	340	513	0.662768	225.341	2	8
chr19	12960000	13275000	CALR	NM_004343.4	chr19	12980787	12982198	chr19	13040830	13068614	7	340	513	0.662768	225.341	2	13
chr19	12960000	13275000	CALR	NM_004343.4	chr19	12982805	12986445	chr19	13040830	13068614	9	340	513	0.662768	225.341	2	11
chr19	12960000	13275000	CALR	NM_004343.4	chr19	13003938	13005229	chr19	13040830	13068614	10	340	513	0.662768	225.341	2	10
chr19	12960000	13275000	CALR	NM_004343.4	chr19	13018875	13020443	chr19	13040830	13068614	11	340	513	0.662768	225.341	2	9
chr19	12960000	13275000	CALR	NM_004343.4	chr19	13034663	13035985	chr19	13040830	13068614	21	340	513	0.662768	225.341	2	5
chr19	12960000	13275000	CALR	NM_004343.4	chr19	13039070	13040386	chr19	13040830	13068614	30	340	513	0.662768	225.341	2	3
chr19	12960000	13275000	CALR	NM_004343.4	chr19	13040830	13068614	chr19	13073250	13074338	17	340	513	0.662768	225.341	2	6
chr19	12960000	13275000	CALR	NM_004343.4	chr19	13040830	13068614	chr19	13074978	13079094	62	340	513	0.662768	225.341	2	1
chr19	12960000	13275000	CALR	NM_004343.4	chr19	13040830	13068614	chr19	13088315	13090347	10	340	513	0.662768	225.341	2	10
chr19	12960000	13275000	CALR	NM_004343.4	chr19	13040830	13068614	chr19	13091954	13098446	21	340	513	0.662768	225.341	2	5
chr19	12960000	13275000	CALR	NM_004343.4	chr19	13040830	13068614	chr19	13142379	13151235	15	340	513	0.662768	225.341	2	7
chr19	12960000	13275000	CALR	NM_004343.4	chr19	13040830	13068614	chr19	13160643	13177345	27	340	513	0.662768	225.341	2	4
chr19	12960000	13275000	CALR	NM_004343.4	chr19	13040830	13068614	chr19	13181295	13191176	8	340	513	0.662768	225.341	2	12
chr19	12960000	13275000	CALR	NM_004343.4	chr19	13040830	13068614	chr19	13217538	13219024	4	340	513	0.662768	225.341	2	16
chr19	12960000	13275000	CALR	NM_004343.4	chr19	13040830	13068614	chr19	13219661	13221960	7	340	513	0.662768	225.341	2	13
chr19	12960000	13275000	CALR	NM_004343.4	chr19	13040830	13068614	chr19	13242912	13244011	5	340	513	0.662768	225.341	2	15
chr19	12960000	13275000	CALR	NM_004343.4	chr19	13040830	13068614	chr19	13244972	13246260	4	340	513	0.662768	225.341	2	16
chr19	12960000	13275000	CALR	NM_004343.4	chr19	13040830	13068614	chr19	13253568	13255662	6	340	513	0.662768	225.341	2	14
chr19	12960000	13275000	CALR	NM_004343.4	chr19	13040830	13068614	chr19	13270927	13276769	52	340	513	0.662768	225.341	2	2
chr2	85770000	85865000	CAPG	NM_001256139.2	chr2	85639411	85643037	chr2	85815304	85821080	9	9	49	0.183673	1.65306	12	1
chr2	85770000	85865000	CAPG	NM_001256140.2	chr2	85636250	85638086	chr2	85815304	85821080	3	3	23	0.130435	0.391304	13	2
chr2	85770000	85865000	CAPG	NM_001320732.2	chr2	85636250	85638086	chr2	85815304	85821080	3	3	23	0.130435	0.391304	13	2
chr2	85770000	85865000	CAPG	NM_001320733.2	chr2	85636250	85638086	chr2	85815304	85821080	3	3	23	0.130435	0.391304	13	2
chr2	85770000	85865000	CAPG	NM_001320734.2	chr2	85636250	85638086	chr2	85815304	85821080	3	3	23	0.130435	0.391304	13	2
chr2	85770000	85865000	CAPG	NM_001747.4	chr2	85636250	85638086	chr2	85815304	85821080	3	3	23	0.130435	0.391304	13	2
chr11	65270000	65290000	CAPN1	NM_001198868.2	chr11	64947259	64951780	chr11	65263078	65280458	20	20	256	0.078125	1.5625	16	1
chr11	65270000	65290000	CAPN1	NM_001198869.2	chr11	64947259	64951780	chr11	65263078	65280458	20	20	256	0.078125	1.5625	16	1
chr11	65270000	65290000	CAPN1	NM_005186.4	chr11	64947259	64951780	chr11	65263078	65280458	20	20	256	0.078125	1.5625	16	1
chr11	65270000	65290000	CATSPERZ	NM_001039496.2	chr11	64065206	64069201	chr11	65263078	65280458	3	3	3	1	3	10	1
chr21	36160000	36240000	CBR3	NM_001236.4	chr21	36230542	36239097	chr21	37501729	37510051	4	4	178	0.0224719	0.0898876	2	1
chr7	26215000	26225000	CBX3	NM_007276.5	chr7	26215904	26221410	chr7	26236444	26245660	32	195	661	0.295008	57.5265	1	2
chr7	26215000	26225000	CBX3	NM_007276.5	chr7	26222019	26229674	chr7	26236444	26245660	163	195	661	0.295008	57.5265	1	1
chr7	26215000	26225000	CBX3	NM_016587.4	chr7	26215904	26221410	chr7	26236444	26245660	32	195	661	0.295008	57.5265	1	2
chr7	26215000	26225000	CBX3	NM_016587.4	chr7	26222019	26229674	chr7	26236444	26245660	163	195	661	0.295008	57.5265	1	1
chr19	12960000	13275000	CCDC130	NM_001320561.2	chr19	13270927	13276769	chr19	13839907	13846642	7	7	132	0.0530303	0.371212	18	1
chr19	12960000	13275000	CCDC130	NM_001320564.2	chr19	13270927	13276769	chr19	13839907	13846642	7	7	132	0.0530303	0.371212	18	1
chr19	12960000	13275000	CCDC130	NM_001320565.2	chr19	13270927	13276769	chr19	13839907	13846642	7	7	132	0.0530303	0.371212	18	1
chr19	12960000	13275000	CCDC130	NM_001320566.2	chr19	13270927	13276769	chr19	13839907	13846642	7	7	132	0.0530303	0.371212	18	1
chr19	12960000	13275000	CCDC130	NM_001320567.2	chr19	13270927	13276769	chr19	13839907	13846642	7	7	132	0.0530303	0.371212	18	1
chr19	12960000	13275000	CCDC130	NM_001320568.2	chr19	13270927	13276769	chr19	13856841	13862179	4	4	104	0.0384615	0.153846	21	2
chr19	12960000	13275000	CCDC130	NM_001320569.2	chr19	13270927	13276769	chr19	13856841	13862179	4	4	104	0.0384615	0.153846	21	2
chr19	12960000	13275000	CCDC130	NM_030818.4	chr19	13270927	13276769	chr19	13856841	13862179	4	4	104	0.0384615	0.153846	21	2
chr6	151905000	151995000	CCDC170	NM_025059.4	chr6	151813713	151816694	chr6	151936610	151938712	20	152	269	0.565056	85.8885	3	4
chr6	151905000	151995000	CCDC170	NM_025059.4	chr6	151813713	151816694	chr6	151940905	151942107	6	152	269	0.565056	85.8885	3	5
chr6	151905000	151995000	CCDC170	NM_025059.4	chr6	151813713	151816694	chr6	151953264	151955908	27	152	269	0.565056	85.8885	3	3
chr6	151905000	151995000	CCDC170	NM_025059.4	chr6	151813713	151816694	chr6	151968853	151969938	5	152	269	0.565056	85.8885	3	6
chr6	151905000	151995000	CCDC170	NM_025059.4	chr6	151813713	151816694	chr6	151973181	151974507	6	152	269	0.565056	85.8885	3	5
chr6	151905000	151995000	CCDC170	NM_025059.4	chr6	151813713	151816694	chr6	151978670	151983985	47	152	269	0.565056	85.8885	3	1
chr6	151905000	151995000	CCDC170	NM_025059.4	chr6	151813713	151816694	chr6	151985144	151990708	41	152	269	0.565056	85.8885	3	2
chr17	79960000	80050000	CCDC57	NM_001316321.3	chr17	79997087	79998524	chr17	80169486	80178001	3	3	113	0.0265487	0.079646	2	1
chr17	79960000	80050000	CCDC57	NM_001367828.2	chr17	79997087	79998524	chr17	80169486	80178001	3	3	113	0.0265487	0.079646	2	1
chr17	79960000	80050000	CCDC57	NM_198082.4	chr17	79997087	79998524	chr17	80169486	80178001	3	3	113	0.0265487	0.079646	2	1
chr11	65270000	65290000	CCDC85B	NM_006848.3	chr11	65263078	65280458	chr11	65654692	65661965	17	17	75	0.226667	3.85333	9	1
chr1	1215000	1460000	CCNL2	NM_001039577.5	chr1	1333195	1338284	chr1	1439603	1441558	14	14	23	0.608696	8.52174	6	1
chr1	1215000	1460000	CCNL2	NM_001320153.3	chr1	1333195	1338284	chr1	1439603	1441558	14	14	23	0.608696	8.52174	6	1
chr1	1215000	1460000	CCNL2	NM_001320155.3	chr1	1333195	1338284	chr1	1439603	1441558	14	14	23	0.608696	8.52174	6	1
chr1	1215000	1460000	CCNL2	NM_001350497.1	chr1	1333195	1338284	chr1	1439603	1441558	14	14	23	0.608696	8.52174	6	1
chr1	1215000	1460000	CCNL2	NM_001350498.2	chr1	1333195	1338284	chr1	1439603	1441558	14	14	23	0.608696	8.52174	6	1
chr1	1215000	1460000	CCNL2	NM_001350499.2	chr1	1333195	1338284	chr1	1439603	1441558	14	14	23	0.608696	8.52174	6	1
chr1	1215000	1460000	CCNL2	NM_001350500.2	chr1	1333195	1338284	chr1	1439603	1441558	14	14	23	0.608696	8.52174	6	1
chr1	1215000	1460000	CCNL2	NM_030937.6	chr1	1333195	1338284	chr1	1439603	1441558	14	14	23	0.608696	8.52174	6	1
chr11	65270000	65290000	CDC42BPG	NM_017525.3	chr11	64608700	64613452	chr11	65263078	65280458	9	9	473	0.0190275	0.171247	43	1
chr11	65270000	65290000	CDC42EP2	NM_006779.4	chr11	65081518	65085629	chr11	65263078	65280458	20	20	94	0.212766	4.25532	8	1
chr17	37435000	38350000	CDC6	NM_001254.4	chr17	37961166	37978649	chr17	38439066	38448957	3	14	124	0.112903	1.58065	7	2
chr17	37435000	38350000	CDC6	NM_001254.4	chr17	38343925	38352420	chr17	38439066	38448957	11	14	124	0.112903	1.58065	7	1
chr14	105280000	105300000	CDCA4	NM_017955.4	chr14	105285460	105288208	chr14	105484864	105489074	3	3	330	0.00909091	0.0272727	8	1
chr14	105280000	105300000	CDCA4	NM_145701.4	chr14	105285460	105288208	chr14	105484864	105489074	3	3	330	0.00909091	0.0272727	8	1
chr17	37435000	38350000	CDK12	NM_015083.4	chr17	37432275	37441394	chr17	37600899	37646162	7	236	330	0.715152	168.776	1	7
chr17	37435000	38350000	CDK12	NM_015083.4	chr17	37444457	37447451	chr17	37600899	37646162	3	236	330	0.715152	168.776	1	10
chr17	37435000	38350000	CDK12	NM_015083.4	chr17	37447925	37450151	chr17	37600899	37646162	3	236	330	0.715152	168.776	1	10
chr17	37435000	38350000	CDK12	NM_015083.4	chr17	37459227	37465055	chr17	37600899	37646162	8	236	330	0.715152	168.776	1	6
chr17	37435000	38350000	CDK12	NM_015083.4	chr17	37470125	37473720	chr17	37600899	37646162	6	236	330	0.715152	168.776	1	8
chr17	37435000	38350000	CDK12	NM_015083.4	chr17	37480780	37494777	chr17	37600899	37646162	14	236	330	0.715152	168.776	1	4
chr17	37435000	38350000	CDK12	NM_015083.4	chr17	37512244	37525129	chr17	37600899	37646162	17	236	330	0.715152	168.776	1	3
chr17	37435000	38350000	CDK12	NM_015083.4	chr17	37527421	37539649	chr17	37600899	37646162	24	236	330	0.715152	168.776	1	2
chr17	37435000	38350000	CDK12	NM_015083.4	chr17	37540985	37543769	chr17	37600899	37646162	7	236	330	0.715152	168.776	1	7
chr17	37435000	38350000	CDK12	NM_015083.4	chr17	37584997	37600537	chr17	37600899	37646162	127	236	330	0.715152	168.776	1	1
chr17	37435000	38350000	CDK12	NM_015083.4	chr17	37600899	37646162	chr17	37961166	37978649	12	236	330	0.715152	168.776	1	5
chr17	37435000	38350000	CDK12	NM_015083.4	chr17	37600899	37646162	chr17	38303073	38305366	4	236	330	0.715152	168.776	1	9
chr17	37435000	38350000	CDK12	NM_015083.4	chr17	37600899	37646162	chr17	38343925	38352420	4	236	330	0.715152	168.776	1	9
chr17	37435000	38350000	CDK12	NM_016507.4	chr17	37432275	37441394	chr17	37600899	37646162	7	236	330	0.715152	168.776	1	7
chr17	37435000	38350000	CDK12	NM_016507.4	chr17	37444457	37447451	chr17	37600899	37646162	3	236	330	0.715152	168.776	1	10
chr17	37435000	38350000	CDK12	NM_016507.4	chr17	37447925	37450151	chr17	37600899	37646162	3	236	330	0.715152	168.776	1	10
chr17	37435000	38350000	CDK12	NM_016507.4	chr17	37459227	37465055	chr17	37600899	37646162	8	236	330	0.715152	168.776	1	6
chr17	37435000	38350000	CDK12	NM_016507.4	chr17	37470125	37473720	chr17	37600899	37646162	6	236	330	0.715152	168.776	1	8
chr17	37435000	38350000	CDK12	NM_016507.4	chr17	37480780	37494777	chr17	37600899	37646162	14	236	330	0.715152	168.776	1	4
chr17	37435000	38350000	CDK12	NM_016507.4	chr17	37512244	37525129	chr17	37600899	37646162	17	236	330	0.715152	168.776	1	3
chr17	37435000	38350000	CDK12	NM_016507.4	chr17	37527421	37539649	chr17	37600899	37646162	24	236	330	0.715152	168.776	1	2
chr17	37435000	38350000	CDK12	NM_016507.4	chr17	37540985	37543769	chr17	37600899	37646162	7	236	330	0.715152	168.776	1	7
chr17	37435000	38350000	CDK12	NM_016507.4	chr17	37584997	37600537	chr17	37600899	37646162	127	236	330	0.715152	168.776	1	1
chr17	37435000	38350000	CDK12	NM_016507.4	chr17	37600899	37646162	chr17	37961166	37978649	12	236	330	0.715152	168.776	1	5
chr17	37435000	38350000	CDK12	NM_016507.4	chr17	37600899	37646162	chr17	38303073	38305366	4	236	330	0.715152	168.776	1	9
chr17	37435000	38350000	CDK12	NM_016507.4	chr17	37600899	37646162	chr17	38343925	38352420	4	236	330	0.715152	168.776	1	9
chr12	12020000	12210000	CDKN1B	NM_004064.5	chr12	12027085	12033230	chr12	12866703	12881004	7	32	1122	0.0285205	0.912656	2	1
chr12	12020000	12210000	CDKN1B	NM_004064.5	chr12	12037482	12040026	chr12	12866703	12881004	4	32	1122	0.0285205	0.912656	2	3
chr12	12020000	12210000	CDKN1B	NM_004064.5	chr12	12071342	12072997	chr12	12866703	12881004	4	32	1122	0.0285205	0.912656	2	3
chr12	12020000	12210000	CDKN1B	NM_004064.5	chr12	12099926	12104468	chr12	12866703	12881004	3	32	1122	0.0285205	0.912656	2	4
chr12	12020000	12210000	CDKN1B	NM_004064.5	chr12	12159833	12165330	chr12	12866703	12881004	4	32	1122	0.0285205	0.912656	2	3
chr12	12020000	12210000	CDKN1B	NM_004064.5	chr12	12176644	12179414	chr12	12866703	12881004	6	32	1122	0.0285205	0.912656	2	2
chr12	12020000	12210000	CDKN1B	NM_004064.5	chr12	12184139	12187046	chr12	12866703	12881004	4	32	1122	0.0285205	0.912656	2	3
chr20	48930000	48970000	CEBPB	NM_001285878.1	chr20	48801562	48815725	chr20	48918338	48933197	65	214	1675	0.127761	27.3409	1	1
chr20	48930000	48970000	CEBPB	NM_001285878.1	chr20	48801562	48815725	chr20	48937020	48940100	8	214	1675	0.127761	27.3409	1	4
chr20	48930000	48970000	CEBPB	NM_001285878.1	chr20	48801562	48815725	chr20	48943869	48945324	8	214	1675	0.127761	27.3409	1	4
chr20	48930000	48970000	CEBPB	NM_001285878.1	chr20	48801562	48815725	chr20	48946296	48952726	65	214	1675	0.127761	27.3409	1	1
chr20	48930000	48970000	CEBPB	NM_001285878.1	chr20	48801562	48815725	chr20	48954956	48965215	54	214	1675	0.127761	27.3409	1	2
chr20	48930000	48970000	CEBPB	NM_001285878.1	chr20	48801562	48815725	chr20	48965474	48966531	14	214	1675	0.127761	27.3409	1	3
chr20	48930000	48970000	CEBPB	NM_001285879.1	chr20	48801562	48815725	chr20	48918338	48933197	65	214	1675	0.127761	27.3409	1	1
chr20	48930000	48970000	CEBPB	NM_001285879.1	chr20	48801562	48815725	chr20	48937020	48940100	8	214	1675	0.127761	27.3409	1	4
chr20	48930000	48970000	CEBPB	NM_001285879.1	chr20	48801562	48815725	chr20	48943869	48945324	8	214	1675	0.127761	27.3409	1	4
chr20	48930000	48970000	CEBPB	NM_001285879.1	chr20	48801562	48815725	chr20	48946296	48952726	65	214	1675	0.127761	27.3409	1	1
chr20	48930000	48970000	CEBPB	NM_001285879.1	chr20	48801562	48815725	chr20	48954956	48965215	54	214	1675	0.127761	27.3409	1	2
chr20	48930000	48970000	CEBPB	NM_001285879.1	chr20	48801562	48815725	chr20	48965474	48966531	14	214	1675	0.127761	27.3409	1	3
chr20	48930000	48970000	CEBPB	NM_005194.4	chr20	48801562	48815725	chr20	48918338	48933197	65	214	1675	0.127761	27.3409	1	1
chr20	48930000	48970000	CEBPB	NM_005194.4	chr20	48801562	48815725	chr20	48937020	48940100	8	214	1675	0.127761	27.3409	1	4
chr20	48930000	48970000	CEBPB	NM_005194.4	chr20	48801562	48815725	chr20	48943869	48945324	8	214	1675	0.127761	27.3409	1	4
chr20	48930000	48970000	CEBPB	NM_005194.4	chr20	48801562	48815725	chr20	48946296	48952726	65	214	1675	0.127761	27.3409	1	1
chr20	48930000	48970000	CEBPB	NM_005194.4	chr20	48801562	48815725	chr20	48954956	48965215	54	214	1675	0.127761	27.3409	1	2
chr20	48930000	48970000	CEBPB	NM_005194.4	chr20	48801562	48815725	chr20	48965474	48966531	14	214	1675	0.127761	27.3409	1	3
chr17	79960000	80050000	CENPX	NM_001271006.2	chr17	79961252	79965209	chr17	79974517	79984693	8	25	186	0.134409	3.36022	1	2
chr17	79960000	80050000	CENPX	NM_001271006.2	chr17	79968355	79973184	chr17	79974517	79984693	9	25	186	0.134409	3.36022	1	1
chr17	79960000	80050000	CENPX	NM_001271006.2	chr17	79974517	79984693	chr17	79997087	79998524	8	25	186	0.134409	3.36022	1	2
chr17	79960000	80050000	CENPX	NM_001271007.2	chr17	79961252	79965209	chr17	79974517	79984693	8	25	186	0.134409	3.36022	1	2
chr17	79960000	80050000	CENPX	NM_001271007.2	chr17	79968355	79973184	chr17	79974517	79984693	9	25	186	0.134409	3.36022	1	1
chr17	79960000	80050000	CENPX	NM_001271007.2	chr17	79974517	79984693	chr17	79997087	79998524	8	25	186	0.134409	3.36022	1	2
chr17	79960000	80050000	CENPX	NM_001330536.2	chr17	79961252	79965209	chr17	79974517	79984693	8	25	186	0.134409	3.36022	1	2
chr17	79960000	80050000	CENPX	NM_001330536.2	chr17	79968355	79973184	chr17	79974517	79984693	9	25	186	0.134409	3.36022	1	1
chr17	79960000	80050000	CENPX	NM_001330536.2	chr17	79974517	79984693	chr17	79997087	79998524	8	25	186	0.134409	3.36022	1	2
chr17	79960000	80050000	CENPX	NM_144998.4	chr17	79961252	79965209	chr17	79974517	79984693	8	25	186	0.134409	3.36022	1	2
chr17	79960000	80050000	CENPX	NM_144998.4	chr17	79968355	79973184	chr17	79974517	79984693	9	25	186	0.134409	3.36022	1	1
chr17	79960000	80050000	CENPX	NM_144998.4	chr17	79974517	79984693	chr17	79997087	79998524	8	25	186	0.134409	3.36022	1	2
chr14	105280000	105300000	CEP170B	NM_001112726.3	chr14	105292371	105294815	chr14	105329434	105333075	7	24	43	0.55814	13.3953	3	2
chr14	105280000	105300000	CEP170B	NM_001112726.3	chr14	105285460	105288208	chr14	105329434	105333075	17	24	43	0.55814	13.3953	3	1
chr14	105280000	105300000	CEP170B	NM_015005.3	chr14	105285460	105288208	chr14	105329434	105333075	17	24	43	0.55814	13.3953	3	1
chr14	105280000	105300000	CEP170B	NM_015005.3	chr14	105292371	105294815	chr14	105329434	105333075	7	24	43	0.55814	13.3953	3	2
chr11	65270000	65290000	CFL1	NM_005507.3	chr11	65263078	65280458	chr11	65623551	65629102	22	22	307	0.0716612	1.57655	15	1
chr15	64090000	64155000	CIAO2A	NM_001014812.3	chr15	64128512	64130224	chr15	64383455	64390305	4	13	275	0.0472727	0.614545	3	2
chr15	64090000	64155000	CIAO2A	NM_001014812.3	chr15	64147192	64151955	chr15	64383455	64390305	9	13	275	0.0472727	0.614545	3	1
chr15	64090000	64155000	CIAO2A	NM_001289108.2	chr15	64128512	64130224	chr15	64383455	64390305	4	13	275	0.0472727	0.614545	3	2
chr15	64090000	64155000	CIAO2A	NM_001289108.2	chr15	64147192	64151955	chr15	64383455	64390305	9	13	275	0.0472727	0.614545	3	1
chr15	64090000	64155000	CIAO2A	NM_032231.7	chr15	64128512	64130224	chr15	64383455	64390305	4	13	275	0.0472727	0.614545	3	2
chr15	64090000	64155000	CIAO2A	NM_032231.7	chr15	64147192	64151955	chr15	64383455	64390305	9	13	275	0.0472727	0.614545	3	1
chr17	37435000	38350000	CISD3	NM_001136498.2	chr17	36854689	36911674	chr17	37432275	37441394	7	42	468	0.0897436	3.76923	5	2
chr17	37435000	38350000	CISD3	NM_001136498.2	chr17	36854689	36911674	chr17	37480780	37494777	3	42	468	0.0897436	3.76923	5	5
chr17	37435000	38350000	CISD3	NM_001136498.2	chr17	36854689	36911674	chr17	37496720	37500814	3	42	468	0.0897436	3.76923	5	5
chr17	37435000	38350000	CISD3	NM_001136498.2	chr17	36854689	36911674	chr17	37512244	37525129	6	42	468	0.0897436	3.76923	5	3
chr17	37435000	38350000	CISD3	NM_001136498.2	chr17	36854689	36911674	chr17	37527421	37539649	10	42	468	0.0897436	3.76923	5	1
chr17	37435000	38350000	CISD3	NM_001136498.2	chr17	36854689	36911674	chr17	37584997	37600537	6	42	468	0.0897436	3.76923	5	3
chr17	37435000	38350000	CISD3	NM_001136498.2	chr17	36854689	36911674	chr17	37961166	37978649	3	42	468	0.0897436	3.76923	5	5
chr17	37435000	38350000	CISD3	NM_001136498.2	chr17	36854689	36911674	chr17	38306050	38315901	4	42	468	0.0897436	3.76923	5	4
chr1	155040000	155155000	CKS1B	NM_001826.3	chr1	154941750	154949651	chr1	155040995	155042444	8	32	120	0.266667	8.53333	9	2
chr1	155040000	155155000	CKS1B	NM_001826.3	chr1	154941750	154949651	chr1	155044748	155046810	6	32	120	0.266667	8.53333	9	3
chr1	155040000	155155000	CKS1B	NM_001826.3	chr1	154941750	154949651	chr1	155063372	155068587	6	32	120	0.266667	8.53333	9	3
chr1	155040000	155155000	CKS1B	NM_001826.3	chr1	154941750	154949651	chr1	155138824	155141362	12	32	120	0.266667	8.53333	9	1
chr11	65270000	65290000	CLCF1	NM_001166212.2	chr11	65263078	65280458	chr11	67137510	67147841	5	5	356	0.0140449	0.0702247	51	1
chr11	65270000	65290000	CLCF1	NM_013246.3	chr11	65263078	65280458	chr11	67137510	67147841	5	5	356	0.0140449	0.0702247	51	1
chr17	56070000	56080000	CLTC	NM_001288653.2	chr17	56068169	56073621	chr17	57693879	57703064	5	5	2154	0.00232126	0.0116063	9	1
chr17	56070000	56080000	CLTC	NM_004859.4	chr17	56068169	56073621	chr17	57693879	57703064	5	5	2154	0.00232126	0.0116063	9	1
chr17	57855000	58625000	CLTC	NM_001288653.2	chr17	57693879	57703064	chr17	58164123	58167274	4	833	2154	0.386722	322.14	9	10
chr17	57855000	58625000	CLTC	NM_001288653.2	chr17	57693879	57703064	chr17	57852365	57856574	25	833	2154	0.386722	322.14	9	3
chr17	57855000	58625000	CLTC	NM_001288653.2	chr17	57693879	57703064	chr17	57859950	57872352	84	833	2154	0.386722	322.14	9	2
chr17	57855000	58625000	CLTC	NM_001288653.2	chr17	57693879	57703064	chr17	57874273	57875707	5	833	2154	0.386722	322.14	9	9
chr17	57855000	58625000	CLTC	NM_001288653.2	chr17	57693879	57703064	chr17	57877274	57882708	12	833	2154	0.386722	322.14	9	5
chr17	57855000	58625000	CLTC	NM_001288653.2	chr17	57693879	57703064	chr17	57884265	57887088	12	833	2154	0.386722	322.14	9	5
chr17	57855000	58625000	CLTC	NM_001288653.2	chr17	57693879	57703064	chr17	57891619	57893942	10	833	2154	0.386722	322.14	9	6
chr17	57855000	58625000	CLTC	NM_001288653.2	chr17	57693879	57703064	chr17	57898568	57951001	599	833	2154	0.386722	322.14	9	1
chr17	57855000	58625000	CLTC	NM_001288653.2	chr17	57693879	57703064	chr17	57975877	57977301	3	833	2154	0.386722	322.14	9	11
chr17	57855000	58625000	CLTC	NM_001288653.2	chr17	57693879	57703064	chr17	57991124	57992570	13	833	2154	0.386722	322.14	9	4
chr17	57855000	58625000	CLTC	NM_001288653.2	chr17	57693879	57703064	chr17	58007346	58009033	5	833	2154	0.386722	322.14	9	9
chr17	57855000	58625000	CLTC	NM_001288653.2	chr17	57693879	57703064	chr17	58113537	58117893	8	833	2154	0.386722	322.14	9	8
chr17	57855000	58625000	CLTC	NM_001288653.2	chr17	57693879	57703064	chr17	58231274	58234451	3	833	2154	0.386722	322.14	9	11
chr17	57855000	58625000	CLTC	NM_001288653.2	chr17	57693879	57703064	chr17	58167891	58171580	8	833	2154	0.386722	322.14	9	8
chr17	57855000	58625000	CLTC	NM_001288653.2	chr17	57693879	57703064	chr17	58211415	58213749	4	833	2154	0.386722	322.14	9	10
chr17	57855000	58625000	CLTC	NM_001288653.2	chr17	57693879	57703064	chr17	58218394	58221266	5	833	2154	0.386722	322.14	9	9
chr17	57855000	58625000	CLTC	NM_001288653.2	chr17	57693879	57703064	chr17	58422067	58424935	3	833	2154	0.386722	322.14	9	11
chr17	57855000	58625000	CLTC	NM_001288653.2	chr17	57693879	57703064	chr17	58238410	58242905	4	833	2154	0.386722	322.14	9	10
chr17	57855000	58625000	CLTC	NM_001288653.2	chr17	57693879	57703064	chr17	58244094	58246096	4	833	2154	0.386722	322.14	9	10
chr17	57855000	58625000	CLTC	NM_001288653.2	chr17	57693879	57703064	chr17	58247087	58249980	5	833	2154	0.386722	322.14	9	9
chr17	57855000	58625000	CLTC	NM_001288653.2	chr17	57693879	57703064	chr17	57888097	57890714	9	833	2154	0.386722	322.14	9	7
chr17	57855000	58625000	CLTC	NM_001288653.2	chr17	57693879	57703064	chr17	58429026	58436775	5	833	2154	0.386722	322.14	9	9
chr17	57855000	58625000	CLTC	NM_001288653.2	chr17	57693879	57703064	chr17	58447897	58451495	3	833	2154	0.386722	322.14	9	11
chr17	57855000	58625000	CLTC	NM_004859.4	chr17	57693879	57703064	chr17	58211415	58213749	4	833	2154	0.386722	322.14	9	10
chr17	57855000	58625000	CLTC	NM_004859.4	chr17	57693879	57703064	chr17	58231274	58234451	3	833	2154	0.386722	322.14	9	11
chr17	57855000	58625000	CLTC	NM_004859.4	chr17	57693879	57703064	chr17	57884265	57887088	12	833	2154	0.386722	322.14	9	5
chr17	57855000	58625000	CLTC	NM_004859.4	chr17	57693879	57703064	chr17	57888097	57890714	9	833	2154	0.386722	322.14	9	7
chr17	57855000	58625000	CLTC	NM_004859.4	chr17	57693879	57703064	chr17	58218394	58221266	5	833	2154	0.386722	322.14	9	9
chr17	57855000	58625000	CLTC	NM_004859.4	chr17	57693879	57703064	chr17	57898568	57951001	599	833	2154	0.386722	322.14	9	1
chr17	57855000	58625000	CLTC	NM_004859.4	chr17	57693879	57703064	chr17	57975877	57977301	3	833	2154	0.386722	322.14	9	11
chr17	57855000	58625000	CLTC	NM_004859.4	chr17	57693879	57703064	chr17	57991124	57992570	13	833	2154	0.386722	322.14	9	4
chr17	57855000	58625000	CLTC	NM_004859.4	chr17	57693879	57703064	chr17	57891619	57893942	10	833	2154	0.386722	322.14	9	6
chr17	57855000	58625000	CLTC	NM_004859.4	chr17	57693879	57703064	chr17	58113537	58117893	8	833	2154	0.386722	322.14	9	8
chr17	57855000	58625000	CLTC	NM_004859.4	chr17	57693879	57703064	chr17	58164123	58167274	4	833	2154	0.386722	322.14	9	10
chr17	57855000	58625000	CLTC	NM_004859.4	chr17	57693879	57703064	chr17	58167891	58171580	8	833	2154	0.386722	322.14	9	8
chr17	57855000	58625000	CLTC	NM_004859.4	chr17	57693879	57703064	chr17	57852365	57856574	25	833	2154	0.386722	322.14	9	3
chr17	57855000	58625000	CLTC	NM_004859.4	chr17	57693879	57703064	chr17	57859950	57872352	84	833	2154	0.386722	322.14	9	2
chr17	57855000	58625000	CLTC	NM_004859.4	chr17	57693879	57703064	chr17	57874273	57875707	5	833	2154	0.386722	322.14	9	9
chr17	57855000	58625000	CLTC	NM_004859.4	chr17	57693879	57703064	chr17	57877274	57882708	12	833	2154	0.386722	322.14	9	5
chr17	57855000	58625000	CLTC	NM_004859.4	chr17	57693879	57703064	chr17	58238410	58242905	4	833	2154	0.386722	322.14	9	10
chr17	57855000	58625000	CLTC	NM_004859.4	chr17	57693879	57703064	chr17	58244094	58246096	4	833	2154	0.386722	322.14	9	10
chr17	57855000	58625000	CLTC	NM_004859.4	chr17	57693879	57703064	chr17	58247087	58249980	5	833	2154	0.386722	322.14	9	9
chr17	57855000	58625000	CLTC	NM_004859.4	chr17	57693879	57703064	chr17	58422067	58424935	3	833	2154	0.386722	322.14	9	11
chr17	57855000	58625000	CLTC	NM_004859.4	chr17	57693879	57703064	chr17	58429026	58436775	5	833	2154	0.386722	322.14	9	9
chr17	57855000	58625000	CLTC	NM_004859.4	chr17	57693879	57703064	chr17	58007346	58009033	5	833	2154	0.386722	322.14	9	9
chr17	57855000	58625000	CLTC	NM_004859.4	chr17	57693879	57703064	chr17	58447897	58451495	3	833	2154	0.386722	322.14	9	11
chr17	58695000	58705000	CLTC	NM_001288653.2	chr17	57693879	57703064	chr17	58704142	58706039	3	3	2154	0.00139276	0.00417827	9	1
chr17	58695000	58705000	CLTC	NM_004859.4	chr17	57693879	57703064	chr17	58704142	58706039	3	3	2154	0.00139276	0.00417827	9	1
chr11	65270000	65290000	CNIH2	NM_182553.3	chr11	65263078	65280458	chr11	66041548	66058297	12	12	252	0.047619	0.571429	31	1
chr11	72895000	72925000	COA4	NM_016565.3	chr11	72900568	72909187	chr11	73587352	73589307	7	7	65	0.107692	0.753846	10	1
chr1	234650000	234790000	COA6	NM_001012985.2	chr1	234506404	234510308	chr1	234673583	234681578	4	8	33	0.242424	1.93939	2	1
chr1	234650000	234790000	COA6	NM_001012985.2	chr1	234506404	234510308	chr1	234697800	234702532	4	8	33	0.242424	1.93939	2	1
chr1	234650000	234790000	COA6	NM_001206641.3	chr1	234506404	234510308	chr1	234697800	234702532	4	8	33	0.242424	1.93939	2	1
chr1	234650000	234790000	COA6	NM_001206641.3	chr1	234506404	234510308	chr1	234673583	234681578	4	8	33	0.242424	1.93939	2	1
chr1	234650000	234790000	COA6	NM_001301733.1	chr1	234506404	234510308	chr1	234697800	234702532	4	8	33	0.242424	1.93939	2	1
chr1	234650000	234790000	COA6	NM_001301733.1	chr1	234506404	234510308	chr1	234673583	234681578	4	8	33	0.242424	1.93939	2	1
chr11	65270000	65290000	CORO1B	NM_001018070.3	chr11	65263078	65280458	chr11	67198186	67212059	3	3	103	0.0291262	0.0873786	49	1
chr11	65270000	65290000	CORO1B	NM_020441.3	chr11	65263078	65280458	chr11	67198186	67212059	3	3	103	0.0291262	0.0873786	49	1
chr16	85660000	85690000	COX4I1	NM_001318786.3	chr16	85668780	85676825	chr16	85832527	85834467	4	14	148	0.0945946	1.32432	2	2
chr16	85660000	85690000	COX4I1	NM_001318786.3	chr16	85681973	85694473	chr16	85832527	85834467	10	14	148	0.0945946	1.32432	2	1
chr16	85660000	85690000	COX4I1	NM_001318788.2	chr16	85668780	85676825	chr16	85832527	85834467	4	14	148	0.0945946	1.32432	2	2
chr16	85660000	85690000	COX4I1	NM_001318788.2	chr16	85681973	85694473	chr16	85832527	85834467	10	14	148	0.0945946	1.32432	2	1
chr16	85660000	85690000	COX4I1	NM_001318794.2	chr16	85668780	85676825	chr16	85832527	85834467	4	14	148	0.0945946	1.32432	2	2
chr16	85660000	85690000	COX4I1	NM_001318794.2	chr16	85681973	85694473	chr16	85832527	85834467	10	14	148	0.0945946	1.32432	2	1
chr16	85660000	85690000	COX4I1	NM_001318797.3	chr16	85668780	85676825	chr16	85832527	85834467	4	14	148	0.0945946	1.32432	2	2
chr16	85660000	85690000	COX4I1	NM_001318797.3	chr16	85681973	85694473	chr16	85832527	85834467	10	14	148	0.0945946	1.32432	2	1
chr16	85660000	85690000	COX4I1	NM_001318802.2	chr16	85668780	85676825	chr16	85832527	85834467	4	14	148	0.0945946	1.32432	2	2
chr16	85660000	85690000	COX4I1	NM_001318802.2	chr16	85681973	85694473	chr16	85832527	85834467	10	14	148	0.0945946	1.32432	2	1
chr16	85660000	85690000	COX4I1	NM_001861.6	chr16	85668780	85676825	chr16	85832527	85834467	4	14	148	0.0945946	1.32432	2	2
chr16	85660000	85690000	COX4I1	NM_001861.6	chr16	85681973	85694473	chr16	85832527	85834467	10	14	148	0.0945946	1.32432	2	1
chr12	69080000	69280000	CPSF6	NM_001300947.2	chr12	69223321	69227997	chr12	69630579	69638241	3	10	60	0.166667	1.66667	4	2
chr12	69080000	69280000	CPSF6	NM_001300947.2	chr12	69237981	69240315	chr12	69630579	69638241	4	10	60	0.166667	1.66667	4	1
chr12	69080000	69280000	CPSF6	NM_001300947.2	chr12	69257052	69260069	chr12	69630579	69638241	3	10	60	0.166667	1.66667	4	2
chr12	69080000	69280000	CPSF6	NM_007007.3	chr12	69223321	69227997	chr12	69630579	69638241	3	10	60	0.166667	1.66667	4	2
chr12	69080000	69280000	CPSF6	NM_007007.3	chr12	69237981	69240315	chr12	69630579	69638241	4	10	60	0.166667	1.66667	4	1
chr12	69080000	69280000	CPSF6	NM_007007.3	chr12	69257052	69260069	chr12	69630579	69638241	3	10	60	0.166667	1.66667	4	2
chr11	61245000	61430000	CPSF7	NM_001136040.4	chr11	61195075	61198160	chr11	61278335	61282795	10	35	60	0.583333	20.4167	3	1
chr11	61245000	61430000	CPSF7	NM_001136040.4	chr11	61195075	61198160	chr11	61317004	61321855	6	35	60	0.583333	20.4167	3	2
chr11	61245000	61430000	CPSF7	NM_001136040.4	chr11	61195075	61198160	chr11	61353876	61358993	10	35	60	0.583333	20.4167	3	1
chr11	61245000	61430000	CPSF7	NM_001136040.4	chr11	61195075	61198160	chr11	61367975	61371977	4	35	60	0.583333	20.4167	3	4
chr11	61245000	61430000	CPSF7	NM_001136040.4	chr11	61195075	61198160	chr11	61372754	61379319	5	35	60	0.583333	20.4167	3	3
chr11	61245000	61430000	CPSF7	NM_001142565.3	chr11	61195075	61198160	chr11	61278335	61282795	10	35	60	0.583333	20.4167	3	1
chr11	61245000	61430000	CPSF7	NM_001142565.3	chr11	61195075	61198160	chr11	61317004	61321855	6	35	60	0.583333	20.4167	3	2
chr11	61245000	61430000	CPSF7	NM_001142565.3	chr11	61195075	61198160	chr11	61353876	61358993	10	35	60	0.583333	20.4167	3	1
chr11	61245000	61430000	CPSF7	NM_001142565.3	chr11	61195075	61198160	chr11	61367975	61371977	4	35	60	0.583333	20.4167	3	4
chr11	61245000	61430000	CPSF7	NM_001142565.3	chr11	61195075	61198160	chr11	61372754	61379319	5	35	60	0.583333	20.4167	3	3
chr11	61245000	61430000	CPSF7	NM_024811.4	chr11	61195075	61198160	chr11	61278335	61282795	10	35	60	0.583333	20.4167	3	1
chr11	61245000	61430000	CPSF7	NM_024811.4	chr11	61195075	61198160	chr11	61317004	61321855	6	35	60	0.583333	20.4167	3	2
chr11	61245000	61430000	CPSF7	NM_024811.4	chr11	61195075	61198160	chr11	61353876	61358993	10	35	60	0.583333	20.4167	3	1
chr11	61245000	61430000	CPSF7	NM_024811.4	chr11	61195075	61198160	chr11	61367975	61371977	4	35	60	0.583333	20.4167	3	4
chr11	61245000	61430000	CPSF7	NM_024811.4	chr11	61195075	61198160	chr11	61372754	61379319	5	35	60	0.583333	20.4167	3	3
chr1	1215000	1460000	CPTP	NM_001029885.2	chr1	1249198	1252080	chr1	1259028	1261427	13	33	33	1	33	3	2
chr1	1215000	1460000	CPTP	NM_001029885.2	chr1	1253011	1254726	chr1	1259028	1261427	20	33	33	1	33	3	1
chr1	155040000	155155000	CRABP2	NM_001199723.2	chr1	155088467	155094190	chr1	156672340	156683093	3	3	583	0.0051458	0.0154374	18	1
chr1	155040000	155155000	CRABP2	NM_001878.4	chr1	155088467	155094190	chr1	156672340	156683093	3	3	583	0.0051458	0.0154374	18	1
chr14	105160000	105210000	CRIP1	NM_001311.5	chr14	105180766	105183090	chr14	105930233	105960170	3	3	628	0.00477707	0.0143312	3	1
chr14	105280000	105300000	CRIP1	NM_001311.5	chr14	105281064	105283703	chr14	105930233	105960170	7	15	628	0.0238854	0.35828	6	2
chr14	105280000	105300000	CRIP1	NM_001311.5	chr14	105285460	105288208	chr14	105930233	105960170	8	15	628	0.0238854	0.35828	6	1
chr14	105160000	105210000	CRIP2	NM_001270837.2	chr14	105180766	105183090	chr14	105930233	105960170	3	3	628	0.00477707	0.0143312	3	1
chr14	105160000	105210000	CRIP2	NM_001270841.2	chr14	105180766	105183090	chr14	105930233	105960170	3	3	628	0.00477707	0.0143312	3	1
chr14	105160000	105210000	CRIP2	NM_001312.4	chr14	105180766	105183090	chr14	105930233	105960170	3	3	628	0.00477707	0.0143312	3	1
chr14	105280000	105300000	CRIP2	NM_001270837.2	chr14	105285460	105288208	chr14	105930233	105960170	8	15	628	0.0238854	0.35828	6	1
chr14	105280000	105300000	CRIP2	NM_001270837.2	chr14	105281064	105283703	chr14	105930233	105960170	7	15	628	0.0238854	0.35828	6	2
chr14	105280000	105300000	CRIP2	NM_001270841.2	chr14	105281064	105283703	chr14	105930233	105960170	7	15	628	0.0238854	0.35828	6	2
chr14	105280000	105300000	CRIP2	NM_001270841.2	chr14	105285460	105288208	chr14	105930233	105960170	8	15	628	0.0238854	0.35828	6	1
chr14	105280000	105300000	CRIP2	NM_001312.4	chr14	105281064	105283703	chr14	105930233	105960170	7	15	628	0.0238854	0.35828	6	2
chr14	105280000	105300000	CRIP2	NM_001312.4	chr14	105285460	105288208	chr14	105930233	105960170	8	15	628	0.0238854	0.35828	6	1
chr17	37435000	38350000	CSF3	NM_000759.4	chr17	37940132	37946104	chr17	38124347	38202400	6	81	142	0.570423	46.2042	4	5
chr17	37435000	38350000	CSF3	NM_000759.4	chr17	37953913	37959829	chr17	38124347	38202400	3	81	142	0.570423	46.2042	4	7
chr17	37435000	38350000	CSF3	NM_000759.4	chr17	37961166	37978649	chr17	38124347	38202400	20	81	142	0.570423	46.2042	4	2
chr17	37435000	38350000	CSF3	NM_000759.4	chr17	37989543	37993425	chr17	38124347	38202400	5	81	142	0.570423	46.2042	4	6
chr17	37435000	38350000	CSF3	NM_000759.4	chr17	37994505	37998545	chr17	38124347	38202400	5	81	142	0.570423	46.2042	4	6
chr17	37435000	38350000	CSF3	NM_000759.4	chr17	38048211	38054361	chr17	38124347	38202400	7	81	142	0.570423	46.2042	4	4
chr17	37435000	38350000	CSF3	NM_000759.4	chr17	38124347	38202400	chr17	38306050	38315901	11	81	142	0.570423	46.2042	4	3
chr17	37435000	38350000	CSF3	NM_000759.4	chr17	38124347	38202400	chr17	38343925	38352420	24	81	142	0.570423	46.2042	4	1
chr17	37435000	38350000	CSF3	NM_001178147.2	chr17	37940132	37946104	chr17	38124347	38202400	6	81	142	0.570423	46.2042	4	5
chr17	37435000	38350000	CSF3	NM_001178147.2	chr17	37953913	37959829	chr17	38124347	38202400	3	81	142	0.570423	46.2042	4	7
chr17	37435000	38350000	CSF3	NM_001178147.2	chr17	37961166	37978649	chr17	38124347	38202400	20	81	142	0.570423	46.2042	4	2
chr17	37435000	38350000	CSF3	NM_001178147.2	chr17	37989543	37993425	chr17	38124347	38202400	5	81	142	0.570423	46.2042	4	6
chr17	37435000	38350000	CSF3	NM_001178147.2	chr17	37994505	37998545	chr17	38124347	38202400	5	81	142	0.570423	46.2042	4	6
chr17	37435000	38350000	CSF3	NM_001178147.2	chr17	38048211	38054361	chr17	38124347	38202400	7	81	142	0.570423	46.2042	4	4
chr17	37435000	38350000	CSF3	NM_001178147.2	chr17	38124347	38202400	chr17	38306050	38315901	11	81	142	0.570423	46.2042	4	3
chr17	37435000	38350000	CSF3	NM_001178147.2	chr17	38124347	38202400	chr17	38343925	38352420	24	81	142	0.570423	46.2042	4	1
chr17	37435000	38350000	CSF3	NM_172219.3	chr17	37940132	37946104	chr17	38124347	38202400	6	81	142	0.570423	46.2042	4	5
chr17	37435000	38350000	CSF3	NM_172219.3	chr17	37953913	37959829	chr17	38124347	38202400	3	81	142	0.570423	46.2042	4	7
chr17	37435000	38350000	CSF3	NM_172219.3	chr17	37961166	37978649	chr17	38124347	38202400	20	81	142	0.570423	46.2042	4	2
chr17	37435000	38350000	CSF3	NM_172219.3	chr17	37989543	37993425	chr17	38124347	38202400	5	81	142	0.570423	46.2042	4	6
chr17	37435000	38350000	CSF3	NM_172219.3	chr17	37994505	37998545	chr17	38124347	38202400	5	81	142	0.570423	46.2042	4	6
chr17	37435000	38350000	CSF3	NM_172219.3	chr17	38048211	38054361	chr17	38124347	38202400	7	81	142	0.570423	46.2042	4	4
chr17	37435000	38350000	CSF3	NM_172219.3	chr17	38124347	38202400	chr17	38306050	38315901	11	81	142	0.570423	46.2042	4	3
chr17	37435000	38350000	CSF3	NM_172219.3	chr17	38124347	38202400	chr17	38343925	38352420	24	81	142	0.570423	46.2042	4	1
chr17	37435000	38350000	CSF3	NM_172220.3	chr17	37940132	37946104	chr17	38124347	38202400	6	81	142	0.570423	46.2042	4	5
chr17	37435000	38350000	CSF3	NM_172220.3	chr17	37953913	37959829	chr17	38124347	38202400	3	81	142	0.570423	46.2042	4	7
chr17	37435000	38350000	CSF3	NM_172220.3	chr17	37961166	37978649	chr17	38124347	38202400	20	81	142	0.570423	46.2042	4	2
chr17	37435000	38350000	CSF3	NM_172220.3	chr17	37989543	37993425	chr17	38124347	38202400	5	81	142	0.570423	46.2042	4	6
chr17	37435000	38350000	CSF3	NM_172220.3	chr17	37994505	37998545	chr17	38124347	38202400	5	81	142	0.570423	46.2042	4	6
chr17	37435000	38350000	CSF3	NM_172220.3	chr17	38048211	38054361	chr17	38124347	38202400	7	81	142	0.570423	46.2042	4	4
chr17	37435000	38350000	CSF3	NM_172220.3	chr17	38124347	38202400	chr17	38306050	38315901	11	81	142	0.570423	46.2042	4	3
chr17	37435000	38350000	CSF3	NM_172220.3	chr17	38124347	38202400	chr17	38343925	38352420	24	81	142	0.570423	46.2042	4	1
chr11	65270000	65290000	CST6	NM_001323.4	chr11	65263078	65280458	chr11	65778011	65781724	6	6	31	0.193548	1.16129	23	1
chr17	56070000	56080000	CUEDC1	NM_001271875.2	chr17	56029340	56033423	chr17	56068169	56073621	17	17	462	0.0367965	0.625541	6	3
chr17	56070000	56080000	CUEDC1	NM_001292025.2	chr17	55969977	55983921	chr17	56068169	56073621	159	217	4215	0.0514828	11.1718	3	1
chr17	56070000	56080000	CUEDC1	NM_001292025.2	chr17	55969977	55983921	chr17	56076457	56079204	58	217	4215	0.0514828	11.1718	3	2
chr17	57855000	58625000	CUEDC1	NM_001271875.2	chr17	56029340	56033423	chr17	57898568	57951001	14	14	462	0.030303	0.424242	32	3
chr17	57855000	58625000	CUEDC1	NM_001292025.2	chr17	55969977	55983921	chr17	57859950	57872352	16	97	4215	0.023013	2.23227	24	2
chr17	57855000	58625000	CUEDC1	NM_001292025.2	chr17	55969977	55983921	chr17	57898568	57951001	73	97	4215	0.023013	2.23227	24	1
chr17	57855000	58625000	CUEDC1	NM_001292025.2	chr17	55969977	55983921	chr17	57852365	57856574	5	97	4215	0.023013	2.23227	24	4
chr17	57855000	58625000	CUEDC1	NM_001292025.2	chr17	55969977	55983921	chr17	57884265	57887088	3	97	4215	0.023013	2.23227	24	5
chr11	61245000	61430000	CYB561A3	NM_001161454.1	chr11	61128225	61130361	chr11	61278335	61282795	4	4	88	0.0454545	0.181818	10	1
chr11	61245000	61430000	CYB561A3	NM_001300763.2	chr11	61128225	61130361	chr11	61278335	61282795	4	4	88	0.0454545	0.181818	10	1
chr11	61245000	61430000	CYB561A3	NM_153611.6	chr11	61128225	61130361	chr11	61278335	61282795	4	4	88	0.0454545	0.181818	10	1
chr2	38475000	38520000	CYP1B1	NM_000104.4	chr2	38301351	38305124	chr2	38486949	38488766	3	21	168	0.125	2.625	1	3
chr2	38475000	38520000	CYP1B1	NM_000104.4	chr2	38301351	38305124	chr2	38491543	38492923	3	21	168	0.125	2.625	1	3
chr2	38475000	38520000	CYP1B1	NM_000104.4	chr2	38301351	38305124	chr2	38494507	38496602	9	21	168	0.125	2.625	1	1
chr2	38475000	38520000	CYP1B1	NM_000104.4	chr2	38301351	38305124	chr2	38500667	38502472	6	21	168	0.125	2.625	1	2
chr1	155040000	155155000	DAP3	NM_001199849.1	chr1	155040995	155042444	chr1	155656406	155661764	3	10	366	0.0273224	0.273224	12	2
chr1	155040000	155155000	DAP3	NM_001199849.1	chr1	155063372	155068587	chr1	155656406	155661764	3	10	366	0.0273224	0.273224	12	2
chr1	155040000	155155000	DAP3	NM_001199849.1	chr1	155088467	155094190	chr1	155656406	155661764	4	10	366	0.0273224	0.273224	12	1
chr1	155040000	155155000	DAP3	NM_001199850.1	chr1	155040995	155042444	chr1	155656406	155661764	3	10	366	0.0273224	0.273224	12	2
chr1	155040000	155155000	DAP3	NM_001199850.1	chr1	155063372	155068587	chr1	155656406	155661764	3	10	366	0.0273224	0.273224	12	2
chr1	155040000	155155000	DAP3	NM_001199850.1	chr1	155088467	155094190	chr1	155656406	155661764	4	10	366	0.0273224	0.273224	12	1
chr1	155040000	155155000	DAP3	NM_001199851.1	chr1	155063372	155068587	chr1	155656406	155661764	3	10	366	0.0273224	0.273224	12	2
chr1	155040000	155155000	DAP3	NM_001199851.1	chr1	155088467	155094190	chr1	155656406	155661764	4	10	366	0.0273224	0.273224	12	1
chr1	155040000	155155000	DAP3	NM_001199851.1	chr1	155040995	155042444	chr1	155656406	155661764	3	10	366	0.0273224	0.273224	12	2
chr1	155040000	155155000	DAP3	NM_004632.4	chr1	155088467	155094190	chr1	155656406	155661764	4	10	366	0.0273224	0.273224	12	1
chr1	155040000	155155000	DAP3	NM_004632.4	chr1	155040995	155042444	chr1	155656406	155661764	3	10	366	0.0273224	0.273224	12	2
chr1	155040000	155155000	DAP3	NM_004632.4	chr1	155063372	155068587	chr1	155656406	155661764	3	10	366	0.0273224	0.273224	12	2
chr1	155040000	155155000	DAP3	NM_033657.2	chr1	155088467	155094190	chr1	155656406	155661764	4	10	366	0.0273224	0.273224	12	1
chr1	155040000	155155000	DAP3	NM_033657.2	chr1	155063372	155068587	chr1	155656406	155661764	3	10	366	0.0273224	0.273224	12	2
chr1	155040000	155155000	DAP3	NM_033657.2	chr1	155040995	155042444	chr1	155656406	155661764	3	10	366	0.0273224	0.273224	12	2
chr1	155900000	155970000	DAP3	NM_001199849.1	chr1	155656406	155661764	chr1	155930170	155933104	4	4	366	0.010929	0.0437158	5	1
chr1	155900000	155970000	DAP3	NM_001199850.1	chr1	155656406	155661764	chr1	155930170	155933104	4	4	366	0.010929	0.0437158	5	1
chr1	155900000	155970000	DAP3	NM_001199851.1	chr1	155656406	155661764	chr1	155930170	155933104	4	4	366	0.010929	0.0437158	5	1
chr1	155900000	155970000	DAP3	NM_004632.4	chr1	155656406	155661764	chr1	155930170	155933104	4	4	366	0.010929	0.0437158	5	1
chr1	155900000	155970000	DAP3	NM_033657.2	chr1	155656406	155661764	chr1	155930170	155933104	4	4	366	0.010929	0.0437158	5	1
chr15	64090000	64155000	DAPK2	NM_001363730.2	chr15	64147192	64151955	chr15	64336574	64340284	3	3	3	1	3	2	1
chr15	64090000	64155000	DAPK2	NM_001384997.1	chr15	64147192	64151955	chr15	64336574	64340284	3	3	3	1	3	2	1
chr15	64090000	64155000	DAPK2	NM_001384998.1	chr15	64147192	64151955	chr15	64336574	64340284	3	3	3	1	3	2	1
chr15	64090000	64155000	DAPK2	NM_001384999.1	chr15	64147192	64151955	chr15	64336574	64340284	3	3	3	1	3	2	1
chr15	64090000	64155000	DAPK2	NM_001385000.1	chr15	64147192	64151955	chr15	64336574	64340284	3	3	3	1	3	2	1
chr15	64090000	64155000	DAPK2	NM_014326.5	chr15	64147192	64151955	chr15	64336574	64340284	3	3	3	1	3	2	1
chr2	136880000	137125000	DARS1	NM_001293312.1	chr2	136741922	136744617	chr2	136892967	136895424	6	46	120	0.383333	17.6333	1	3
chr2	136880000	137125000	DARS1	NM_001293312.1	chr2	136741922	136744617	chr2	136930719	136933982	3	46	120	0.383333	17.6333	1	6
chr2	136880000	137125000	DARS1	NM_001293312.1	chr2	136741922	136744617	chr2	136936603	136939330	7	46	120	0.383333	17.6333	1	2
chr2	136880000	137125000	DARS1	NM_001293312.1	chr2	136741922	136744617	chr2	136970082	136972994	4	46	120	0.383333	17.6333	1	5
chr2	136880000	137125000	DARS1	NM_001293312.1	chr2	136741922	136744617	chr2	136999189	137005406	3	46	120	0.383333	17.6333	1	6
chr2	136880000	137125000	DARS1	NM_001293312.1	chr2	136741922	136744617	chr2	137040282	137041876	3	46	120	0.383333	17.6333	1	6
chr2	136880000	137125000	DARS1	NM_001293312.1	chr2	136741922	136744617	chr2	137057018	137058935	4	46	120	0.383333	17.6333	1	5
chr2	136880000	137125000	DARS1	NM_001293312.1	chr2	136741922	136744617	chr2	137062573	137064342	3	46	120	0.383333	17.6333	1	6
chr2	136880000	137125000	DARS1	NM_001293312.1	chr2	136741922	136744617	chr2	137066933	137069783	5	46	120	0.383333	17.6333	1	4
chr2	136880000	137125000	DARS1	NM_001293312.1	chr2	136741922	136744617	chr2	137084220	137086499	8	46	120	0.383333	17.6333	1	1
chr2	136880000	137125000	DARS1	NM_001349.4	chr2	136741922	136744617	chr2	136892967	136895424	6	46	120	0.383333	17.6333	1	3
chr2	136880000	137125000	DARS1	NM_001349.4	chr2	136741922	136744617	chr2	136930719	136933982	3	46	120	0.383333	17.6333	1	6
chr2	136880000	137125000	DARS1	NM_001349.4	chr2	136741922	136744617	chr2	136936603	136939330	7	46	120	0.383333	17.6333	1	2
chr2	136880000	137125000	DARS1	NM_001349.4	chr2	136741922	136744617	chr2	136970082	136972994	4	46	120	0.383333	17.6333	1	5
chr2	136880000	137125000	DARS1	NM_001349.4	chr2	136741922	136744617	chr2	136999189	137005406	3	46	120	0.383333	17.6333	1	6
chr2	136880000	137125000	DARS1	NM_001349.4	chr2	136741922	136744617	chr2	137040282	137041876	3	46	120	0.383333	17.6333	1	6
chr2	136880000	137125000	DARS1	NM_001349.4	chr2	136741922	136744617	chr2	137057018	137058935	4	46	120	0.383333	17.6333	1	5
chr2	136880000	137125000	DARS1	NM_001349.4	chr2	136741922	136744617	chr2	137062573	137064342	3	46	120	0.383333	17.6333	1	6
chr2	136880000	137125000	DARS1	NM_001349.4	chr2	136741922	136744617	chr2	137066933	137069783	5	46	120	0.383333	17.6333	1	4
chr2	136880000	137125000	DARS1	NM_001349.4	chr2	136741922	136744617	chr2	137084220	137086499	8	46	120	0.383333	17.6333	1	1
chr19	17315000	17350000	DDA1	NM_024050.6	chr19	17328182	17332218	chr19	17411524	17424386	7	7	216	0.0324074	0.226852	4	1
chr19	17395000	17455000	DDA1	NM_024050.6	chr19	17411524	17424386	chr19	17434812	17442518	45	178	216	0.824074	146.685	1	3
chr19	17395000	17455000	DDA1	NM_024050.6	chr19	17399998	17407884	chr19	17411524	17424386	60	178	216	0.824074	146.685	1	2
chr19	17395000	17455000	DDA1	NM_024050.6	chr19	17411524	17424386	chr19	17425652	17434402	73	178	216	0.824074	146.685	1	1
chr11	61245000	61430000	DDB1	NM_001923.5	chr11	61099101	61105659	chr11	61278335	61282795	3	3	28	0.107143	0.321429	9	1
chr19	12960000	13275000	DDX39A	NM_005804.4	chr19	13270927	13276769	chr19	14526828	14531648	4	4	301	0.013289	0.0531561	26	1
chr1	161045000	161065000	DEDD	NM_001039711.2	chr1	161045816	161047077	chr1	161100460	161103963	10	10	54	0.185185	1.85185	2	1
chr1	161045000	161065000	DEDD	NM_001039712.2	chr1	161045816	161047077	chr1	161100460	161103963	10	10	54	0.185185	1.85185	2	1
chr1	161045000	161065000	DEDD	NM_001330765.2	chr1	161045816	161047077	chr1	161100460	161103963	10	10	54	0.185185	1.85185	2	1
chr1	161045000	161065000	DEDD	NM_032998.3	chr1	161045816	161047077	chr1	161100460	161103963	10	10	54	0.185185	1.85185	2	1
chr14	100590000	100655000	DEGS2	NM_206918.3	chr14	100603116	100624374	chr14	100624849	100627529	9	9	9	1	9	2	1
chr19	12960000	13275000	DHPS	NM_001206974.2	chr19	12786016	12795454	chr19	12982805	12986445	4	13	37	0.351351	4.56757	13	2
chr19	12960000	13275000	DHPS	NM_001206974.2	chr19	12786016	12795454	chr19	13074978	13079094	4	13	37	0.351351	4.56757	13	2
chr19	12960000	13275000	DHPS	NM_001206974.2	chr19	12786016	12795454	chr19	13270927	13276769	5	13	37	0.351351	4.56757	13	1
chr19	12960000	13275000	DHPS	NM_001369691.1	chr19	12786016	12795454	chr19	12982805	12986445	4	13	37	0.351351	4.56757	13	2
chr19	12960000	13275000	DHPS	NM_001369691.1	chr19	12786016	12795454	chr19	13074978	13079094	4	13	37	0.351351	4.56757	13	2
chr19	12960000	13275000	DHPS	NM_001369691.1	chr19	12786016	12795454	chr19	13270927	13276769	5	13	37	0.351351	4.56757	13	1
chr19	12960000	13275000	DHPS	NM_001369692.1	chr19	12786016	12795454	chr19	12982805	12986445	4	13	37	0.351351	4.56757	13	2
chr19	12960000	13275000	DHPS	NM_001369692.1	chr19	12786016	12795454	chr19	13074978	13079094	4	13	37	0.351351	4.56757	13	2
chr19	12960000	13275000	DHPS	NM_001369692.1	chr19	12786016	12795454	chr19	13270927	13276769	5	13	37	0.351351	4.56757	13	1
chr19	12960000	13275000	DHPS	NM_001369693.1	chr19	12786016	12795454	chr19	12982805	12986445	4	13	37	0.351351	4.56757	13	2
chr19	12960000	13275000	DHPS	NM_001369693.1	chr19	12786016	12795454	chr19	13074978	13079094	4	13	37	0.351351	4.56757	13	2
chr19	12960000	13275000	DHPS	NM_001369693.1	chr19	12786016	12795454	chr19	13270927	13276769	5	13	37	0.351351	4.56757	13	1
chr19	12960000	13275000	DHPS	NM_001930.4	chr19	12786016	12795454	chr19	12982805	12986445	4	13	37	0.351351	4.56757	13	2
chr19	12960000	13275000	DHPS	NM_001930.4	chr19	12786016	12795454	chr19	13074978	13079094	4	13	37	0.351351	4.56757	13	2
chr19	12960000	13275000	DHPS	NM_001930.4	chr19	12786016	12795454	chr19	13270927	13276769	5	13	37	0.351351	4.56757	13	1
chr19	12960000	13275000	DHPS	NM_013406.3	chr19	12786016	12795454	chr19	12982805	12986445	4	13	37	0.351351	4.56757	13	2
chr19	12960000	13275000	DHPS	NM_013406.3	chr19	12786016	12795454	chr19	13074978	13079094	4	13	37	0.351351	4.56757	13	2
chr19	12960000	13275000	DHPS	NM_013406.3	chr19	12786016	12795454	chr19	13270927	13276769	5	13	37	0.351351	4.56757	13	1
chr17	27430000	27540000	DHRS13	NM_144683.4	chr17	27227284	27236711	chr17	27441580	27456150	3	3	59	0.0508475	0.152542	11	1
chr17	57855000	58625000	DHX40	NM_001166301.2	chr17	57641858	57644637	chr17	57859950	57872352	8	79	113	0.699115	55.2301	11	2
chr17	57855000	58625000	DHX40	NM_001166301.2	chr17	57641858	57644637	chr17	57877274	57882708	4	79	113	0.699115	55.2301	11	3
chr17	57855000	58625000	DHX40	NM_001166301.2	chr17	57641858	57644637	chr17	57898568	57951001	61	79	113	0.699115	55.2301	11	1
chr17	57855000	58625000	DHX40	NM_001166301.2	chr17	57641858	57644637	chr17	58113537	58117893	3	79	113	0.699115	55.2301	11	4
chr17	57855000	58625000	DHX40	NM_001166301.2	chr17	57641858	57644637	chr17	58167891	58171580	3	79	113	0.699115	55.2301	11	4
chr17	57855000	58625000	DHX40	NM_024612.5	chr17	57641858	57644637	chr17	57877274	57882708	4	79	113	0.699115	55.2301	11	3
chr17	57855000	58625000	DHX40	NM_024612.5	chr17	57641858	57644637	chr17	57898568	57951001	61	79	113	0.699115	55.2301	11	1
chr17	57855000	58625000	DHX40	NM_024612.5	chr17	57641858	57644637	chr17	58113537	58117893	3	79	113	0.699115	55.2301	11	4
chr17	57855000	58625000	DHX40	NM_024612.5	chr17	57641858	57644637	chr17	58167891	58171580	3	79	113	0.699115	55.2301	11	4
chr17	57855000	58625000	DHX40	NM_024612.5	chr17	57641858	57644637	chr17	57859950	57872352	8	79	113	0.699115	55.2301	11	2
chr14	50305000	50415000	DNAAF2	NM_001083908.2	chr14	50099702	50103641	chr14	50327194	50331213	8	27	195	0.138462	3.73846	4	1
chr14	50305000	50415000	DNAAF2	NM_001083908.2	chr14	50099702	50103641	chr14	50331503	50332862	5	27	195	0.138462	3.73846	4	3
chr14	50305000	50415000	DNAAF2	NM_001083908.2	chr14	50099702	50103641	chr14	50333438	50336409	4	27	195	0.138462	3.73846	4	4
chr14	50305000	50415000	DNAAF2	NM_001083908.2	chr14	50099702	50103641	chr14	50364374	50366967	3	27	195	0.138462	3.73846	4	5
chr14	50305000	50415000	DNAAF2	NM_001083908.2	chr14	50099702	50103641	chr14	50371448	50376819	7	27	195	0.138462	3.73846	4	2
chr14	50305000	50415000	DNAAF2	NM_001378453.1	chr14	50099702	50103641	chr14	50327194	50331213	8	27	195	0.138462	3.73846	4	1
chr14	50305000	50415000	DNAAF2	NM_001378453.1	chr14	50099702	50103641	chr14	50331503	50332862	5	27	195	0.138462	3.73846	4	3
chr14	50305000	50415000	DNAAF2	NM_001378453.1	chr14	50099702	50103641	chr14	50333438	50336409	4	27	195	0.138462	3.73846	4	4
chr14	50305000	50415000	DNAAF2	NM_001378453.1	chr14	50099702	50103641	chr14	50364374	50366967	3	27	195	0.138462	3.73846	4	5
chr14	50305000	50415000	DNAAF2	NM_001378453.1	chr14	50099702	50103641	chr14	50371448	50376819	7	27	195	0.138462	3.73846	4	2
chr14	50305000	50415000	DNAAF2	NM_018139.3	chr14	50099702	50103641	chr14	50327194	50331213	8	27	195	0.138462	3.73846	4	1
chr14	50305000	50415000	DNAAF2	NM_018139.3	chr14	50099702	50103641	chr14	50331503	50332862	5	27	195	0.138462	3.73846	4	3
chr14	50305000	50415000	DNAAF2	NM_018139.3	chr14	50099702	50103641	chr14	50333438	50336409	4	27	195	0.138462	3.73846	4	4
chr14	50305000	50415000	DNAAF2	NM_018139.3	chr14	50099702	50103641	chr14	50364374	50366967	3	27	195	0.138462	3.73846	4	5
chr14	50305000	50415000	DNAAF2	NM_018139.3	chr14	50099702	50103641	chr14	50371448	50376819	7	27	195	0.138462	3.73846	4	2
chr19	12960000	13275000	DNAJB1	NM_001300914.2	chr19	13270927	13276769	chr19	14623499	14634673	3	3	626	0.00479233	0.014377	30	1
chr19	12960000	13275000	DNAJB1	NM_006145.3	chr19	13270927	13276769	chr19	14623499	14634673	3	3	626	0.00479233	0.014377	30	1
chr11	65270000	65290000	DNAJC4	NM_001307980.1	chr11	63996836	64003129	chr11	65263078	65280458	4	4	8	0.5	2	12	1
chr11	65270000	65290000	DNAJC4	NM_001307981.1	chr11	63996836	64003129	chr11	65263078	65280458	4	4	8	0.5	2	12	1
chr11	65270000	65290000	DNAJC4	NM_005528.4	chr11	63996836	64003129	chr11	65263078	65280458	4	4	8	0.5	2	12	1
chr19	12960000	13275000	DNASE2	NM_001375.3	chr19	12975158	12980310	chr19	12988866	13002942	30	117	179	0.653631	76.4749	4	1
chr19	12960000	13275000	DNASE2	NM_001375.3	chr19	12980787	12982198	chr19	12988866	13002942	14	117	179	0.653631	76.4749	4	4
chr19	12960000	13275000	DNASE2	NM_001375.3	chr19	12982805	12986445	chr19	12988866	13002942	22	117	179	0.653631	76.4749	4	2
chr19	12960000	13275000	DNASE2	NM_001375.3	chr19	12988866	13002942	chr19	13039070	13040386	8	117	179	0.653631	76.4749	4	6
chr19	12960000	13275000	DNASE2	NM_001375.3	chr19	12988866	13002942	chr19	13074978	13079094	15	117	179	0.653631	76.4749	4	3
chr19	12960000	13275000	DNASE2	NM_001375.3	chr19	12988866	13002942	chr19	13091954	13098446	6	117	179	0.653631	76.4749	4	7
chr19	12960000	13275000	DNASE2	NM_001375.3	chr19	12988866	13002942	chr19	13142379	13151235	5	117	179	0.653631	76.4749	4	8
chr19	12960000	13275000	DNASE2	NM_001375.3	chr19	12988866	13002942	chr19	13219661	13221960	3	117	179	0.653631	76.4749	4	10
chr19	12960000	13275000	DNASE2	NM_001375.3	chr19	12988866	13002942	chr19	13244972	13246260	4	117	179	0.653631	76.4749	4	9
chr19	12960000	13275000	DNASE2	NM_001375.3	chr19	12988866	13002942	chr19	13270927	13276769	10	117	179	0.653631	76.4749	4	5
chr11	65270000	65290000	DPF2	NM_001330308.2	chr11	65100682	65101887	chr11	65263078	65280458	15	15	44	0.340909	5.11364	7	1
chr11	65270000	65290000	DPF2	NM_006268.5	chr11	65100682	65101887	chr11	65263078	65280458	15	15	44	0.340909	5.11364	7	1
chr20	48930000	48970000	DPM1	NM_001317034.1	chr20	48954956	48965215	chr20	49573597	49576300	3	3	205	0.0146341	0.0439024	8	1
chr20	48930000	48970000	DPM1	NM_001317035.1	chr20	48954956	48965215	chr20	49573597	49576300	3	3	205	0.0146341	0.0439024	8	1
chr20	48930000	48970000	DPM1	NM_001317036.1	chr20	48954956	48965215	chr20	49573597	49576300	3	3	205	0.0146341	0.0439024	8	1
chr20	48930000	48970000	DPM1	NM_003859.3	chr20	48954956	48965215	chr20	49573597	49576300	3	3	205	0.0146341	0.0439024	8	1
chr1	155040000	155155000	DPM3	NM_018973.4	chr1	155088467	155094190	chr1	155111916	155114183	17	17	23	0.73913	12.5652	8	1
chr1	155040000	155155000	DPM3	NM_153741.2	chr1	155088467	155094190	chr1	155111916	155114183	17	17	23	0.73913	12.5652	8	1
chr11	65270000	65290000	DPP3	NM_001256670.2	chr11	65263078	65280458	chr11	66238604	66250420	5	5	40	0.125	0.625	29	1
chr11	65270000	65290000	DPP3	NM_005700.5	chr11	65263078	65280458	chr11	66238604	66250420	5	5	40	0.125	0.625	29	1
chr11	65270000	65290000	DPP3	NM_130443.4	chr11	65263078	65280458	chr11	66238604	66250420	5	5	40	0.125	0.625	29	1
chr11	65270000	65290000	DRAP1	NM_006442.4	chr11	65263078	65280458	chr11	65682581	65689339	4	4	27	0.148148	0.592593	30	1
chr1	1215000	1460000	DVL1	NM_001330311.2	chr1	1253011	1254726	chr1	1278119	1298111	12	44	73	0.60274	26.5205	4	2
chr1	1215000	1460000	DVL1	NM_001330311.2	chr1	1278119	1298111	chr1	1299220	1300367	29	44	73	0.60274	26.5205	4	1
chr1	1215000	1460000	DVL1	NM_001330311.2	chr1	1278119	1298111	chr1	1439603	1441558	3	44	73	0.60274	26.5205	4	3
chr1	1215000	1460000	DVL1	NM_004421.3	chr1	1253011	1254726	chr1	1278119	1298111	12	44	73	0.60274	26.5205	4	2
chr1	1215000	1460000	DVL1	NM_004421.3	chr1	1278119	1298111	chr1	1299220	1300367	29	44	73	0.60274	26.5205	4	1
chr1	1215000	1460000	DVL1	NM_004421.3	chr1	1278119	1298111	chr1	1439603	1441558	3	44	73	0.60274	26.5205	4	3
chr17	56070000	56080000	DYNLL2	NM_080677.3	chr17	56068169	56073621	chr17	56159116	56162741	7	13	47	0.276596	3.59574	5	1
chr17	56070000	56080000	DYNLL2	NM_080677.3	chr17	56076457	56079204	chr17	56159116	56162741	6	13	47	0.276596	3.59574	5	2
chr17	57855000	58625000	DYNLL2	NM_080677.3	chr17	56159116	56162741	chr17	57898568	57951001	6	6	47	0.12766	0.765957	28	1
chr14	35820000	35895000	EAPP	NM_001318916.2	chr14	35006187	35010763	chr14	35821053	35826241	3	3	67	0.0447761	0.134328	7	1
chr14	35820000	35895000	EAPP	NM_018453.4	chr14	35006187	35010763	chr14	35821053	35826241	3	3	67	0.0447761	0.134328	7	1
chr3	172210000	172390000	ECT2	NM_001258315.2	chr3	172253981	172265393	chr3	172466642	172469759	6	9	23	0.391304	3.52174	2	1
chr3	172210000	172390000	ECT2	NM_001258315.2	chr3	172301796	172304079	chr3	172466642	172469759	3	9	23	0.391304	3.52174	2	2
chr3	172210000	172390000	ECT2	NM_001258316.2	chr3	172253981	172265393	chr3	172466642	172469759	6	9	23	0.391304	3.52174	2	1
chr3	172210000	172390000	ECT2	NM_001258316.2	chr3	172301796	172304079	chr3	172466642	172469759	3	9	23	0.391304	3.52174	2	2
chr3	172210000	172390000	ECT2	NM_001349094.2	chr3	172253981	172265393	chr3	172466642	172469759	6	9	23	0.391304	3.52174	2	1
chr3	172210000	172390000	ECT2	NM_001349094.2	chr3	172301796	172304079	chr3	172466642	172469759	3	9	23	0.391304	3.52174	2	2
chr3	172210000	172390000	ECT2	NM_001349095.2	chr3	172253981	172265393	chr3	172466642	172469759	6	9	23	0.391304	3.52174	2	1
chr3	172210000	172390000	ECT2	NM_001349095.2	chr3	172301796	172304079	chr3	172466642	172469759	3	9	23	0.391304	3.52174	2	2
chr3	172210000	172390000	ECT2	NM_001349096.2	chr3	172253981	172265393	chr3	172466642	172469759	6	9	23	0.391304	3.52174	2	1
chr3	172210000	172390000	ECT2	NM_001349096.2	chr3	172301796	172304079	chr3	172466642	172469759	3	9	23	0.391304	3.52174	2	2
chr3	172210000	172390000	ECT2	NM_001349097.2	chr3	172253981	172265393	chr3	172466642	172469759	6	9	23	0.391304	3.52174	2	1
chr3	172210000	172390000	ECT2	NM_001349097.2	chr3	172301796	172304079	chr3	172466642	172469759	3	9	23	0.391304	3.52174	2	2
chr3	172210000	172390000	ECT2	NM_001349098.2	chr3	172253981	172265393	chr3	172466642	172469759	6	9	23	0.391304	3.52174	2	1
chr3	172210000	172390000	ECT2	NM_001349098.2	chr3	172301796	172304079	chr3	172466642	172469759	3	9	23	0.391304	3.52174	2	2
chr3	172210000	172390000	ECT2	NM_001349099.2	chr3	172253981	172265393	chr3	172466642	172469759	6	9	23	0.391304	3.52174	2	1
chr3	172210000	172390000	ECT2	NM_001349099.2	chr3	172301796	172304079	chr3	172466642	172469759	3	9	23	0.391304	3.52174	2	2
chr3	172210000	172390000	ECT2	NM_001349100.2	chr3	172253981	172265393	chr3	172466642	172469759	6	9	23	0.391304	3.52174	2	1
chr3	172210000	172390000	ECT2	NM_001349100.2	chr3	172301796	172304079	chr3	172466642	172469759	3	9	23	0.391304	3.52174	2	2
chr3	172210000	172390000	ECT2	NM_001349101.2	chr3	172253981	172265393	chr3	172466642	172469759	6	9	23	0.391304	3.52174	2	1
chr3	172210000	172390000	ECT2	NM_001349101.2	chr3	172301796	172304079	chr3	172466642	172469759	3	9	23	0.391304	3.52174	2	2
chr3	172210000	172390000	ECT2	NM_001349102.2	chr3	172253981	172265393	chr3	172466642	172469759	6	9	23	0.391304	3.52174	2	1
chr3	172210000	172390000	ECT2	NM_001349102.2	chr3	172301796	172304079	chr3	172466642	172469759	3	9	23	0.391304	3.52174	2	2
chr3	172210000	172390000	ECT2	NM_001349103.2	chr3	172253981	172265393	chr3	172466642	172469759	6	9	23	0.391304	3.52174	2	1
chr3	172210000	172390000	ECT2	NM_001349103.2	chr3	172301796	172304079	chr3	172466642	172469759	3	9	23	0.391304	3.52174	2	2
chr3	172210000	172390000	ECT2	NM_001349104.2	chr3	172253981	172265393	chr3	172466642	172469759	6	9	23	0.391304	3.52174	2	1
chr3	172210000	172390000	ECT2	NM_001349104.2	chr3	172301796	172304079	chr3	172466642	172469759	3	9	23	0.391304	3.52174	2	2
chr3	172210000	172390000	ECT2	NM_018098.6	chr3	172253981	172265393	chr3	172466642	172469759	6	9	23	0.391304	3.52174	2	1
chr3	172210000	172390000	ECT2	NM_018098.6	chr3	172301796	172304079	chr3	172466642	172469759	3	9	23	0.391304	3.52174	2	2
chr3	4735000	4805000	EDEM1	NM_014674.3	chr3	4750778	4767098	chr3	5227803	5231900	4	4	9	0.444444	1.77778	3	1
chr6	74065000	74310000	EEF1A1	NM_001402.6	chr6	74189857	74192398	chr6	74229665	74232058	11	120	149	0.805369	96.6443	1	4
chr6	74065000	74310000	EEF1A1	NM_001402.6	chr6	74223271	74226108	chr6	74229665	74232058	55	120	149	0.805369	96.6443	1	1
chr6	74065000	74310000	EEF1A1	NM_001402.6	chr6	74229665	74232058	chr6	74261040	74262494	11	120	149	0.805369	96.6443	1	4
chr6	74065000	74310000	EEF1A1	NM_001402.6	chr6	74229665	74232058	chr6	74275242	74278602	8	120	149	0.805369	96.6443	1	5
chr6	74065000	74310000	EEF1A1	NM_001402.6	chr6	74229665	74232058	chr6	74288145	74291619	18	120	149	0.805369	96.6443	1	2
chr6	74065000	74310000	EEF1A1	NM_001402.6	chr6	74229665	74232058	chr6	74294931	74295958	17	120	149	0.805369	96.6443	1	3
chr11	65270000	65290000	EFEMP2	NM_016938.5	chr11	65263078	65280458	chr11	65639202	65641670	3	3	19	0.157895	0.473684	35	1
chr1	155040000	155155000	EFNA1	NM_004428.3	chr1	155063372	155068587	chr1	155095760	155104787	40	203	250	0.812	164.836	1	2
chr1	155040000	155155000	EFNA1	NM_004428.3	chr1	155077656	155078983	chr1	155095760	155104787	18	203	250	0.812	164.836	1	4
chr1	155040000	155155000	EFNA1	NM_004428.3	chr1	155095760	155104787	chr1	155130934	155132168	9	203	250	0.812	164.836	1	5
chr1	155040000	155155000	EFNA1	NM_004428.3	chr1	155095760	155104787	chr1	155138824	155141362	25	203	250	0.812	164.836	1	3
chr1	155040000	155155000	EFNA1	NM_004428.3	chr1	155088467	155094190	chr1	155095760	155104787	111	203	250	0.812	164.836	1	1
chr1	155040000	155155000	EFNA1	NM_182685.2	chr1	155063372	155068587	chr1	155095760	155104787	40	203	250	0.812	164.836	1	2
chr1	155040000	155155000	EFNA1	NM_182685.2	chr1	155077656	155078983	chr1	155095760	155104787	18	203	250	0.812	164.836	1	4
chr1	155040000	155155000	EFNA1	NM_182685.2	chr1	155088467	155094190	chr1	155095760	155104787	111	203	250	0.812	164.836	1	1
chr1	155040000	155155000	EFNA1	NM_182685.2	chr1	155095760	155104787	chr1	155130934	155132168	9	203	250	0.812	164.836	1	5
chr1	155040000	155155000	EFNA1	NM_182685.2	chr1	155095760	155104787	chr1	155138824	155141362	25	203	250	0.812	164.836	1	3
chr1	155040000	155155000	EFNA3	NM_004952.5	chr1	155042920	155044329	chr1	155047705	155062288	14	125	216	0.578704	72.338	3	5
chr1	155040000	155155000	EFNA3	NM_004952.5	chr1	155044748	155046810	chr1	155047705	155062288	30	125	216	0.578704	72.338	3	1
chr1	155040000	155155000	EFNA3	NM_004952.5	chr1	155047705	155062288	chr1	155063372	155068587	29	125	216	0.578704	72.338	3	2
chr1	155040000	155155000	EFNA3	NM_004952.5	chr1	155047705	155062288	chr1	155088467	155094190	12	125	216	0.578704	72.338	3	6
chr1	155040000	155155000	EFNA3	NM_004952.5	chr1	155047705	155062288	chr1	155138824	155141362	16	125	216	0.578704	72.338	3	4
chr1	155040000	155155000	EFNA3	NM_004952.5	chr1	155040995	155042444	chr1	155047705	155062288	24	125	216	0.578704	72.338	3	3
chr1	155040000	155155000	EFNA4	NM_005227.3	chr1	155032303	155038433	chr1	155040995	155042444	21	52	64	0.8125	42.25	4	1
chr1	155040000	155155000	EFNA4	NM_005227.3	chr1	155032303	155038433	chr1	155042920	155044329	9	52	64	0.8125	42.25	4	4
chr1	155040000	155155000	EFNA4	NM_005227.3	chr1	155032303	155038433	chr1	155044748	155046810	12	52	64	0.8125	42.25	4	2
chr1	155040000	155155000	EFNA4	NM_005227.3	chr1	155032303	155038433	chr1	155088467	155094190	10	52	64	0.8125	42.25	4	3
chr1	155040000	155155000	EFNA4	NM_182689.2	chr1	155032303	155038433	chr1	155040995	155042444	21	52	64	0.8125	42.25	4	1
chr1	155040000	155155000	EFNA4	NM_182689.2	chr1	155032303	155038433	chr1	155042920	155044329	9	52	64	0.8125	42.25	4	4
chr1	155040000	155155000	EFNA4	NM_182689.2	chr1	155032303	155038433	chr1	155044748	155046810	12	52	64	0.8125	42.25	4	2
chr1	155040000	155155000	EFNA4	NM_182689.2	chr1	155032303	155038433	chr1	155088467	155094190	10	52	64	0.8125	42.25	4	3
chr1	155040000	155155000	EFNA4	NM_182690.3	chr1	155032303	155038433	chr1	155042920	155044329	9	52	64	0.8125	42.25	4	4
chr1	155040000	155155000	EFNA4	NM_182690.3	chr1	155032303	155038433	chr1	155044748	155046810	12	52	64	0.8125	42.25	4	2
chr1	155040000	155155000	EFNA4	NM_182690.3	chr1	155032303	155038433	chr1	155088467	155094190	10	52	64	0.8125	42.25	4	3
chr1	155040000	155155000	EFNA4	NM_182690.3	chr1	155032303	155038433	chr1	155040995	155042444	21	52	64	0.8125	42.25	4	1
chr11	65270000	65290000	EHBP1L1	NM_001099409.3	chr11	65263078	65280458	chr11	65335996	65345706	96	96	537	0.178771	17.162	3	1
chr11	65270000	65290000	EHBP1L1	NM_001351087.2	chr11	65263078	65280458	chr11	65335996	65345706	96	96	537	0.178771	17.162	3	1
chr11	65270000	65290000	EHD1	NM_001282444.2	chr11	64643143	64648604	chr11	65263078	65280458	10	10	407	0.02457	0.2457	41	1
chr11	65270000	65290000	EHD1	NM_001282445.2	chr11	64643143	64648604	chr11	65263078	65280458	10	10	407	0.02457	0.2457	41	1
chr11	65270000	65290000	EHD1	NM_006795.4	chr11	64643143	64648604	chr11	65263078	65280458	10	10	407	0.02457	0.2457	41	1
chr17	37435000	38350000	EIF1	NM_005801.4	chr17	37961166	37978649	chr17	39843799	39846781	3	3	432	0.00694444	0.0208333	11	1
chr11	65270000	65290000	EIF1AD	NM_001242481.2	chr11	65263078	65280458	chr11	65768893	65771593	12	12	171	0.0701754	0.842105	28	1
chr11	65270000	65290000	EIF1AD	NM_001242482.2	chr11	65263078	65280458	chr11	65768893	65771593	12	12	171	0.0701754	0.842105	28	1
chr11	65270000	65290000	EIF1AD	NM_001242483.2	chr11	65263078	65280458	chr11	65768893	65771593	12	12	171	0.0701754	0.842105	28	1
chr11	65270000	65290000	EIF1AD	NM_001242484.2	chr11	65263078	65280458	chr11	65768893	65771593	12	12	171	0.0701754	0.842105	28	1
chr11	65270000	65290000	EIF1AD	NM_001242485.2	chr11	65263078	65280458	chr11	65768893	65771593	12	12	171	0.0701754	0.842105	28	1
chr11	65270000	65290000	EIF1AD	NM_001242486.2	chr11	65263078	65280458	chr11	65768893	65771593	12	12	171	0.0701754	0.842105	28	1
chr11	65270000	65290000	EIF1AD	NM_032325.4	chr11	65263078	65280458	chr11	65768893	65771593	12	12	171	0.0701754	0.842105	28	1
chr3	149055000	149290000	EIF2A	NM_001319043.2	chr3	149101190	149107573	chr3	150263266	150266375	4	4	321	0.0124611	0.0498442	11	1
chr3	149055000	149290000	EIF2A	NM_001319044.2	chr3	149101190	149107573	chr3	150263266	150266375	4	4	321	0.0124611	0.0498442	11	1
chr3	149055000	149290000	EIF2A	NM_001319045.2	chr3	149101190	149107573	chr3	150263266	150266375	4	4	321	0.0124611	0.0498442	11	1
chr3	149055000	149290000	EIF2A	NM_001319046.2	chr3	149101190	149107573	chr3	150263266	150266375	4	4	321	0.0124611	0.0498442	11	1
chr3	149055000	149290000	EIF2A	NM_032025.5	chr3	149101190	149107573	chr3	150263266	150266375	4	4	321	0.0124611	0.0498442	11	1
chr22	38435000	38445000	EIF3L	NM_001242923.2	chr22	38243588	38246107	chr22	38433383	38436202	3	3	39	0.0769231	0.230769	1	1
chr22	38435000	38445000	EIF3L	NM_001363785.2	chr22	38243588	38246107	chr22	38433383	38436202	3	3	39	0.0769231	0.230769	1	1
chr22	38435000	38445000	EIF3L	NM_016091.4	chr22	38243588	38246107	chr22	38433383	38436202	3	3	39	0.0769231	0.230769	1	1
chr2	85770000	85865000	ELMOD3	NM_001135021.2	chr2	85579742	85585572	chr2	85815304	85821080	12	18	83	0.216867	3.90361	10	1
chr2	85770000	85865000	ELMOD3	NM_001135021.2	chr2	85579742	85585572	chr2	85772489	85780109	6	18	83	0.216867	3.90361	10	2
chr2	85770000	85865000	ELMOD3	NM_001135022.2	chr2	85579742	85585572	chr2	85772489	85780109	6	18	83	0.216867	3.90361	10	2
chr2	85770000	85865000	ELMOD3	NM_001135022.2	chr2	85579742	85585572	chr2	85815304	85821080	12	18	83	0.216867	3.90361	10	1
chr2	85770000	85865000	ELMOD3	NM_001135023.2	chr2	85579742	85585572	chr2	85772489	85780109	6	18	83	0.216867	3.90361	10	2
chr2	85770000	85865000	ELMOD3	NM_001135023.2	chr2	85579742	85585572	chr2	85815304	85821080	12	18	83	0.216867	3.90361	10	1
chr2	85770000	85865000	ELMOD3	NM_001329791.2	chr2	85579742	85585572	chr2	85815304	85821080	12	18	83	0.216867	3.90361	10	1
chr2	85770000	85865000	ELMOD3	NM_001329791.2	chr2	85579742	85585572	chr2	85772489	85780109	6	18	83	0.216867	3.90361	10	2
chr2	85770000	85865000	ELMOD3	NM_001329792.2	chr2	85579742	85585572	chr2	85815304	85821080	12	18	83	0.216867	3.90361	10	1
chr2	85770000	85865000	ELMOD3	NM_001329792.2	chr2	85579742	85585572	chr2	85772489	85780109	6	18	83	0.216867	3.90361	10	2
chr2	85770000	85865000	ELMOD3	NM_001329793.2	chr2	85579742	85585572	chr2	85772489	85780109	6	18	83	0.216867	3.90361	10	2
chr2	85770000	85865000	ELMOD3	NM_001329793.2	chr2	85579742	85585572	chr2	85815304	85821080	12	18	83	0.216867	3.90361	10	1
chr16	85660000	85690000	EMC8	NM_001142288.2	chr16	85668780	85676825	chr16	85832527	85834467	4	14	148	0.0945946	1.32432	2	2
chr16	85660000	85690000	EMC8	NM_001142288.2	chr16	85681973	85694473	chr16	85832527	85834467	10	14	148	0.0945946	1.32432	2	1
chr16	85660000	85690000	EMC8	NM_006067.5	chr16	85668780	85676825	chr16	85832527	85834467	4	14	148	0.0945946	1.32432	2	2
chr16	85660000	85690000	EMC8	NM_006067.5	chr16	85681973	85694473	chr16	85832527	85834467	10	14	148	0.0945946	1.32432	2	1
chr12	14940000	15170000	EPS8	NM_004447.6	chr12	14971490	14973820	chr12	15940348	15943865	3	3	63	0.047619	0.142857	7	1
chr12	14940000	15170000	ERP27	NM_001300784.2	chr12	14988774	14989892	chr12	15080954	15084224	9	75	84	0.892857	66.9643	3	3
chr12	14940000	15170000	ERP27	NM_001300784.2	chr12	14992493	14995483	chr12	15080954	15084224	7	75	84	0.892857	66.9643	3	5
chr12	14940000	15170000	ERP27	NM_001300784.2	chr12	14997836	15000607	chr12	15080954	15084224	8	75	84	0.892857	66.9643	3	4
chr12	14940000	15170000	ERP27	NM_001300784.2	chr12	15001920	15004901	chr12	15080954	15084224	7	75	84	0.892857	66.9643	3	5
chr12	14940000	15170000	ERP27	NM_001300784.2	chr12	15006358	15008713	chr12	15080954	15084224	6	75	84	0.892857	66.9643	3	6
chr12	14940000	15170000	ERP27	NM_001300784.2	chr12	15053119	15060224	chr12	15080954	15084224	15	75	84	0.892857	66.9643	3	1
chr12	14940000	15170000	ERP27	NM_001300784.2	chr12	15065548	15068125	chr12	15080954	15084224	9	75	84	0.892857	66.9643	3	3
chr12	14940000	15170000	ERP27	NM_001300784.2	chr12	15080954	15084224	chr12	15087071	15089578	14	75	84	0.892857	66.9643	3	2
chr6	151905000	151995000	ESR1	NM_000125.4	chr6	151923744	151925179	chr6	152124077	152131279	3	186	457	0.407002	75.7024	4	17
chr6	151905000	151995000	ESR1	NM_000125.4	chr6	151930156	151931438	chr6	152124077	152131279	4	186	457	0.407002	75.7024	4	16
chr6	151905000	151995000	ESR1	NM_000125.4	chr6	151936610	151938712	chr6	152124077	152131279	29	186	457	0.407002	75.7024	4	9
chr6	151905000	151995000	ESR1	NM_000125.4	chr6	151940905	151942107	chr6	152124077	152131279	4	186	457	0.407002	75.7024	4	16
chr6	151905000	151995000	ESR1	NM_000125.4	chr6	151948708	151951878	chr6	152124077	152131279	4	186	457	0.407002	75.7024	4	16
chr6	151905000	151995000	ESR1	NM_000125.4	chr6	151953264	151955908	chr6	152124077	152131279	27	186	457	0.407002	75.7024	4	10
chr6	151905000	151995000	ESR1	NM_000125.4	chr6	151973181	151974507	chr6	152124077	152131279	5	186	457	0.407002	75.7024	4	15
chr6	151905000	151995000	ESR1	NM_000125.4	chr6	151978670	151983985	chr6	152124077	152131279	61	186	457	0.407002	75.7024	4	5
chr6	151905000	151995000	ESR1	NM_000125.4	chr6	151985144	151990708	chr6	152124077	152131279	49	186	457	0.407002	75.7024	4	6
chr6	151905000	151995000	ESR1	NM_001122740.2	chr6	151923744	151925179	chr6	152124077	152131279	3	186	457	0.407002	75.7024	4	17
chr6	151905000	151995000	ESR1	NM_001122740.2	chr6	151930156	151931438	chr6	152124077	152131279	4	186	457	0.407002	75.7024	4	16
chr6	151905000	151995000	ESR1	NM_001122740.2	chr6	151936610	151938712	chr6	152124077	152131279	29	186	457	0.407002	75.7024	4	9
chr6	151905000	151995000	ESR1	NM_001122740.2	chr6	151940905	151942107	chr6	152124077	152131279	4	186	457	0.407002	75.7024	4	16
chr6	151905000	151995000	ESR1	NM_001122740.2	chr6	151948708	151951878	chr6	152124077	152131279	4	186	457	0.407002	75.7024	4	16
chr6	151905000	151995000	ESR1	NM_001122740.2	chr6	151953264	151955908	chr6	152124077	152131279	27	186	457	0.407002	75.7024	4	10
chr6	151905000	151995000	ESR1	NM_001122740.2	chr6	151973181	151974507	chr6	152124077	152131279	5	186	457	0.407002	75.7024	4	15
chr6	151905000	151995000	ESR1	NM_001122740.2	chr6	151978670	151983985	chr6	152124077	152131279	61	186	457	0.407002	75.7024	4	5
chr6	151905000	151995000	ESR1	NM_001122740.2	chr6	151985144	151990708	chr6	152124077	152131279	49	186	457	0.407002	75.7024	4	6
chr6	151905000	151995000	ESR1	NM_001122741.2	chr6	151923744	151925179	chr6	152124077	152131279	3	186	457	0.407002	75.7024	4	17
chr6	151905000	151995000	ESR1	NM_001122741.2	chr6	151930156	151931438	chr6	152124077	152131279	4	186	457	0.407002	75.7024	4	16
chr6	151905000	151995000	ESR1	NM_001122741.2	chr6	151936610	151938712	chr6	152124077	152131279	29	186	457	0.407002	75.7024	4	9
chr6	151905000	151995000	ESR1	NM_001122741.2	chr6	151940905	151942107	chr6	152124077	152131279	4	186	457	0.407002	75.7024	4	16
chr6	151905000	151995000	ESR1	NM_001122741.2	chr6	151948708	151951878	chr6	152124077	152131279	4	186	457	0.407002	75.7024	4	16
chr6	151905000	151995000	ESR1	NM_001122741.2	chr6	151953264	151955908	chr6	152124077	152131279	27	186	457	0.407002	75.7024	4	10
chr6	151905000	151995000	ESR1	NM_001122741.2	chr6	151973181	151974507	chr6	152124077	152131279	5	186	457	0.407002	75.7024	4	15
chr6	151905000	151995000	ESR1	NM_001122741.2	chr6	151978670	151983985	chr6	152124077	152131279	61	186	457	0.407002	75.7024	4	5
chr6	151905000	151995000	ESR1	NM_001122741.2	chr6	151985144	151990708	chr6	152124077	152131279	49	186	457	0.407002	75.7024	4	6
chr6	151905000	151995000	ESR1	NM_001122742.2	chr6	151923744	151925179	chr6	152008736	152014072	7	750	1458	0.514403	385.802	1	14
chr6	151905000	151995000	ESR1	NM_001122742.2	chr6	151930156	151931438	chr6	152008736	152014072	19	750	1458	0.514403	385.802	1	11
chr6	151905000	151995000	ESR1	NM_001122742.2	chr6	151936610	151938712	chr6	152008736	152014072	98	750	1458	0.514403	385.802	1	4
chr6	151905000	151995000	ESR1	NM_001122742.2	chr6	151940905	151942107	chr6	152008736	152014072	16	750	1458	0.514403	385.802	1	13
chr6	151905000	151995000	ESR1	NM_001122742.2	chr6	151948708	151951878	chr6	152008736	152014072	35	750	1458	0.514403	385.802	1	8
chr6	151905000	151995000	ESR1	NM_001122742.2	chr6	151953264	151955908	chr6	152008736	152014072	102	750	1458	0.514403	385.802	1	3
chr6	151905000	151995000	ESR1	NM_001122742.2	chr6	151968853	151969938	chr6	152008736	152014072	18	750	1458	0.514403	385.802	1	12
chr6	151905000	151995000	ESR1	NM_001122742.2	chr6	151973181	151974507	chr6	152008736	152014072	46	750	1458	0.514403	385.802	1	7
chr6	151905000	151995000	ESR1	NM_001122742.2	chr6	151978670	151983985	chr6	152008736	152014072	204	750	1458	0.514403	385.802	1	2
chr6	151905000	151995000	ESR1	NM_001122742.2	chr6	151985144	151990708	chr6	152008736	152014072	205	750	1458	0.514403	385.802	1	1
chr6	151905000	151995000	ESR1	NM_001291230.2	chr6	151923744	151925179	chr6	152124077	152131279	3	186	457	0.407002	75.7024	4	17
chr6	151905000	151995000	ESR1	NM_001291230.2	chr6	151930156	151931438	chr6	152124077	152131279	4	186	457	0.407002	75.7024	4	16
chr6	151905000	151995000	ESR1	NM_001291230.2	chr6	151936610	151938712	chr6	152124077	152131279	29	186	457	0.407002	75.7024	4	9
chr6	151905000	151995000	ESR1	NM_001291230.2	chr6	151940905	151942107	chr6	152124077	152131279	4	186	457	0.407002	75.7024	4	16
chr6	151905000	151995000	ESR1	NM_001291230.2	chr6	151948708	151951878	chr6	152124077	152131279	4	186	457	0.407002	75.7024	4	16
chr6	151905000	151995000	ESR1	NM_001291230.2	chr6	151953264	151955908	chr6	152124077	152131279	27	186	457	0.407002	75.7024	4	10
chr6	151905000	151995000	ESR1	NM_001291230.2	chr6	151973181	151974507	chr6	152124077	152131279	5	186	457	0.407002	75.7024	4	15
chr6	151905000	151995000	ESR1	NM_001291230.2	chr6	151978670	151983985	chr6	152124077	152131279	61	186	457	0.407002	75.7024	4	5
chr6	151905000	151995000	ESR1	NM_001291230.2	chr6	151985144	151990708	chr6	152124077	152131279	49	186	457	0.407002	75.7024	4	6
chr6	151905000	151995000	ESR1	NM_001291241.2	chr6	151923744	151925179	chr6	152124077	152131279	3	186	457	0.407002	75.7024	4	17
chr6	151905000	151995000	ESR1	NM_001291241.2	chr6	151930156	151931438	chr6	152124077	152131279	4	186	457	0.407002	75.7024	4	16
chr6	151905000	151995000	ESR1	NM_001291241.2	chr6	151936610	151938712	chr6	152124077	152131279	29	186	457	0.407002	75.7024	4	9
chr6	151905000	151995000	ESR1	NM_001291241.2	chr6	151940905	151942107	chr6	152124077	152131279	4	186	457	0.407002	75.7024	4	16
chr6	151905000	151995000	ESR1	NM_001291241.2	chr6	151948708	151951878	chr6	152124077	152131279	4	186	457	0.407002	75.7024	4	16
chr6	151905000	151995000	ESR1	NM_001291241.2	chr6	151953264	151955908	chr6	152124077	152131279	27	186	457	0.407002	75.7024	4	10
chr6	151905000	151995000	ESR1	NM_001291241.2	chr6	151973181	151974507	chr6	152124077	152131279	5	186	457	0.407002	75.7024	4	15
chr6	151905000	151995000	ESR1	NM_001291241.2	chr6	151978670	151983985	chr6	152124077	152131279	61	186	457	0.407002	75.7024	4	5
chr6	151905000	151995000	ESR1	NM_001291241.2	chr6	151985144	151990708	chr6	152124077	152131279	49	186	457	0.407002	75.7024	4	6
chr6	151905000	151995000	ESR1	NM_001328100.2	chr6	151923744	151925179	chr6	152124077	152131279	3	186	457	0.407002	75.7024	4	17
chr6	151905000	151995000	ESR1	NM_001328100.2	chr6	151930156	151931438	chr6	152124077	152131279	4	186	457	0.407002	75.7024	4	16
chr6	151905000	151995000	ESR1	NM_001328100.2	chr6	151936610	151938712	chr6	152124077	152131279	29	186	457	0.407002	75.7024	4	9
chr6	151905000	151995000	ESR1	NM_001328100.2	chr6	151940905	151942107	chr6	152124077	152131279	4	186	457	0.407002	75.7024	4	16
chr6	151905000	151995000	ESR1	NM_001328100.2	chr6	151948708	151951878	chr6	152124077	152131279	4	186	457	0.407002	75.7024	4	16
chr6	151905000	151995000	ESR1	NM_001328100.2	chr6	151953264	151955908	chr6	152124077	152131279	27	186	457	0.407002	75.7024	4	10
chr6	151905000	151995000	ESR1	NM_001328100.2	chr6	151973181	151974507	chr6	152124077	152131279	5	186	457	0.407002	75.7024	4	15
chr6	151905000	151995000	ESR1	NM_001328100.2	chr6	151978670	151983985	chr6	152124077	152131279	61	186	457	0.407002	75.7024	4	5
chr6	151905000	151995000	ESR1	NM_001328100.2	chr6	151985144	151990708	chr6	152124077	152131279	49	186	457	0.407002	75.7024	4	6
chr6	151905000	151995000	ESR1	NM_001385569.1	chr6	151923744	151925179	chr6	152124077	152131279	3	186	457	0.407002	75.7024	4	17
chr6	151905000	151995000	ESR1	NM_001385569.1	chr6	151930156	151931438	chr6	152124077	152131279	4	186	457	0.407002	75.7024	4	16
chr6	151905000	151995000	ESR1	NM_001385569.1	chr6	151936610	151938712	chr6	152124077	152131279	29	186	457	0.407002	75.7024	4	9
chr6	151905000	151995000	ESR1	NM_001385569.1	chr6	151940905	151942107	chr6	152124077	152131279	4	186	457	0.407002	75.7024	4	16
chr6	151905000	151995000	ESR1	NM_001385569.1	chr6	151948708	151951878	chr6	152124077	152131279	4	186	457	0.407002	75.7024	4	16
chr6	151905000	151995000	ESR1	NM_001385569.1	chr6	151953264	151955908	chr6	152124077	152131279	27	186	457	0.407002	75.7024	4	10
chr6	151905000	151995000	ESR1	NM_001385569.1	chr6	151973181	151974507	chr6	152124077	152131279	5	186	457	0.407002	75.7024	4	15
chr6	151905000	151995000	ESR1	NM_001385569.1	chr6	151978670	151983985	chr6	152124077	152131279	61	186	457	0.407002	75.7024	4	5
chr6	151905000	151995000	ESR1	NM_001385569.1	chr6	151985144	151990708	chr6	152124077	152131279	49	186	457	0.407002	75.7024	4	6
chr6	151905000	151995000	ESR1	NM_001385570.1	chr6	151923744	151925179	chr6	152008736	152014072	7	750	1458	0.514403	385.802	1	14
chr6	151905000	151995000	ESR1	NM_001385570.1	chr6	151930156	151931438	chr6	152008736	152014072	19	750	1458	0.514403	385.802	1	11
chr6	151905000	151995000	ESR1	NM_001385570.1	chr6	151936610	151938712	chr6	152008736	152014072	98	750	1458	0.514403	385.802	1	4
chr6	151905000	151995000	ESR1	NM_001385570.1	chr6	151940905	151942107	chr6	152008736	152014072	16	750	1458	0.514403	385.802	1	13
chr6	151905000	151995000	ESR1	NM_001385570.1	chr6	151948708	151951878	chr6	152008736	152014072	35	750	1458	0.514403	385.802	1	8
chr6	151905000	151995000	ESR1	NM_001385570.1	chr6	151953264	151955908	chr6	152008736	152014072	102	750	1458	0.514403	385.802	1	3
chr6	151905000	151995000	ESR1	NM_001385570.1	chr6	151968853	151969938	chr6	152008736	152014072	18	750	1458	0.514403	385.802	1	12
chr6	151905000	151995000	ESR1	NM_001385570.1	chr6	151973181	151974507	chr6	152008736	152014072	46	750	1458	0.514403	385.802	1	7
chr6	151905000	151995000	ESR1	NM_001385570.1	chr6	151978670	151983985	chr6	152008736	152014072	204	750	1458	0.514403	385.802	1	2
chr6	151905000	151995000	ESR1	NM_001385570.1	chr6	151985144	151990708	chr6	152008736	152014072	205	750	1458	0.514403	385.802	1	1
chr6	151905000	151995000	ESR1	NM_001385571.1	chr6	151923744	151925179	chr6	152124077	152131279	3	186	457	0.407002	75.7024	4	17
chr6	151905000	151995000	ESR1	NM_001385571.1	chr6	151930156	151931438	chr6	152124077	152131279	4	186	457	0.407002	75.7024	4	16
chr6	151905000	151995000	ESR1	NM_001385571.1	chr6	151936610	151938712	chr6	152124077	152131279	29	186	457	0.407002	75.7024	4	9
chr6	151905000	151995000	ESR1	NM_001385571.1	chr6	151940905	151942107	chr6	152124077	152131279	4	186	457	0.407002	75.7024	4	16
chr6	151905000	151995000	ESR1	NM_001385571.1	chr6	151948708	151951878	chr6	152124077	152131279	4	186	457	0.407002	75.7024	4	16
chr6	151905000	151995000	ESR1	NM_001385571.1	chr6	151953264	151955908	chr6	152124077	152131279	27	186	457	0.407002	75.7024	4	10
chr6	151905000	151995000	ESR1	NM_001385571.1	chr6	151973181	151974507	chr6	152124077	152131279	5	186	457	0.407002	75.7024	4	15
chr6	151905000	151995000	ESR1	NM_001385571.1	chr6	151978670	151983985	chr6	152124077	152131279	61	186	457	0.407002	75.7024	4	5
chr6	151905000	151995000	ESR1	NM_001385571.1	chr6	151985144	151990708	chr6	152124077	152131279	49	186	457	0.407002	75.7024	4	6
chr6	151905000	151995000	ESR1	NM_001385572.1	chr6	151923744	151925179	chr6	152124077	152131279	3	186	457	0.407002	75.7024	4	17
chr6	151905000	151995000	ESR1	NM_001385572.1	chr6	151930156	151931438	chr6	152124077	152131279	4	186	457	0.407002	75.7024	4	16
chr6	151905000	151995000	ESR1	NM_001385572.1	chr6	151936610	151938712	chr6	152124077	152131279	29	186	457	0.407002	75.7024	4	9
chr6	151905000	151995000	ESR1	NM_001385572.1	chr6	151940905	151942107	chr6	152124077	152131279	4	186	457	0.407002	75.7024	4	16
chr6	151905000	151995000	ESR1	NM_001385572.1	chr6	151948708	151951878	chr6	152124077	152131279	4	186	457	0.407002	75.7024	4	16
chr6	151905000	151995000	ESR1	NM_001385572.1	chr6	151953264	151955908	chr6	152124077	152131279	27	186	457	0.407002	75.7024	4	10
chr6	151905000	151995000	ESR1	NM_001385572.1	chr6	151973181	151974507	chr6	152124077	152131279	5	186	457	0.407002	75.7024	4	15
chr6	151905000	151995000	ESR1	NM_001385572.1	chr6	151978670	151983985	chr6	152124077	152131279	61	186	457	0.407002	75.7024	4	5
chr6	151905000	151995000	ESR1	NM_001385572.1	chr6	151985144	151990708	chr6	152124077	152131279	49	186	457	0.407002	75.7024	4	6
chr12	12020000	12210000	ETV6	NM_001987.5	chr12	11801535	11806809	chr12	12027085	12033230	7	53	245	0.216327	11.4653	1	3
chr12	12020000	12210000	ETV6	NM_001987.5	chr12	11801535	11806809	chr12	12034661	12036466	5	53	245	0.216327	11.4653	1	4
chr12	12020000	12210000	ETV6	NM_001987.5	chr12	11801535	11806809	chr12	12037482	12040026	9	53	245	0.216327	11.4653	1	1
chr12	12020000	12210000	ETV6	NM_001987.5	chr12	11801535	11806809	chr12	12040632	12042170	3	53	245	0.216327	11.4653	1	6
chr12	12020000	12210000	ETV6	NM_001987.5	chr12	11801535	11806809	chr12	12125117	12129630	4	53	245	0.216327	11.4653	1	5
chr12	12020000	12210000	ETV6	NM_001987.5	chr12	11801535	11806809	chr12	12133034	12135215	3	53	245	0.216327	11.4653	1	6
chr12	12020000	12210000	ETV6	NM_001987.5	chr12	11801535	11806809	chr12	12159833	12165330	5	53	245	0.216327	11.4653	1	4
chr12	12020000	12210000	ETV6	NM_001987.5	chr12	11801535	11806809	chr12	12167864	12173615	9	53	245	0.216327	11.4653	1	1
chr12	12020000	12210000	ETV6	NM_001987.5	chr12	11801535	11806809	chr12	12176644	12179414	8	53	245	0.216327	11.4653	1	2
chr14	100590000	100655000	EVL	NM_001330221.2	chr14	100435730	100439107	chr14	100594455	100600050	4	14	262	0.0534351	0.748092	4	3
chr14	100590000	100655000	EVL	NM_001330221.2	chr14	100435730	100439107	chr14	100603116	100624374	10	14	262	0.0534351	0.748092	4	2
chr14	100590000	100655000	EVL	NM_016337.3	chr14	100531023	100536339	chr14	100603116	100624374	36	36	609	0.0591133	2.12808	3	1
chr11	61245000	61430000	FADS1	NM_013402.7	chr11	61353876	61358993	chr11	61581391	61585925	5	5	17	0.294118	1.47059	5	1
chr11	61245000	61430000	FADS2	NM_001281501.1	chr11	61353876	61358993	chr11	61581391	61585925	5	5	17	0.294118	1.47059	5	1
chr11	61245000	61430000	FADS2	NM_001281502.1	chr11	61353876	61358993	chr11	61581391	61585925	5	5	17	0.294118	1.47059	5	1
chr14	35820000	35895000	FAM177A1	NM_001289022.3	chr14	35514394	35516730	chr14	35843140	35845777	3	6	51	0.117647	0.705882	6	1
chr14	35820000	35895000	FAM177A1	NM_001289022.3	chr14	35514394	35516730	chr14	35885138	35886964	3	6	51	0.117647	0.705882	6	1
chr14	35820000	35895000	FAM177A1	NM_173607.5	chr14	35514394	35516730	chr14	35843140	35845777	3	6	51	0.117647	0.705882	6	1
chr14	35820000	35895000	FAM177A1	NM_173607.5	chr14	35514394	35516730	chr14	35885138	35886964	3	6	51	0.117647	0.705882	6	1
chr11	65270000	65290000	FAM89B	NM_001098784.2	chr11	65263078	65280458	chr11	65335996	65345706	96	96	537	0.178771	17.162	3	1
chr11	65270000	65290000	FAM89B	NM_001098785.2	chr11	65263078	65280458	chr11	65335996	65345706	96	96	537	0.178771	17.162	3	1
chr11	65270000	65290000	FAM89B	NM_152832.3	chr11	65263078	65280458	chr11	65335996	65345706	96	96	537	0.178771	17.162	3	1
chr19	12960000	13275000	FARSA	NM_004461.3	chr19	12975158	12980310	chr19	13040830	13068614	14	340	513	0.662768	225.341	2	8
chr19	12960000	13275000	FARSA	NM_004461.3	chr19	12980787	12982198	chr19	13040830	13068614	7	340	513	0.662768	225.341	2	13
chr19	12960000	13275000	FARSA	NM_004461.3	chr19	12982805	12986445	chr19	13040830	13068614	9	340	513	0.662768	225.341	2	11
chr19	12960000	13275000	FARSA	NM_004461.3	chr19	13003938	13005229	chr19	13040830	13068614	10	340	513	0.662768	225.341	2	10
chr19	12960000	13275000	FARSA	NM_004461.3	chr19	13018875	13020443	chr19	13040830	13068614	11	340	513	0.662768	225.341	2	9
chr19	12960000	13275000	FARSA	NM_004461.3	chr19	13034663	13035985	chr19	13040830	13068614	21	340	513	0.662768	225.341	2	5
chr19	12960000	13275000	FARSA	NM_004461.3	chr19	13039070	13040386	chr19	13040830	13068614	30	340	513	0.662768	225.341	2	3
chr19	12960000	13275000	FARSA	NM_004461.3	chr19	13040830	13068614	chr19	13073250	13074338	17	340	513	0.662768	225.341	2	6
chr19	12960000	13275000	FARSA	NM_004461.3	chr19	13040830	13068614	chr19	13074978	13079094	62	340	513	0.662768	225.341	2	1
chr19	12960000	13275000	FARSA	NM_004461.3	chr19	13040830	13068614	chr19	13088315	13090347	10	340	513	0.662768	225.341	2	10
chr19	12960000	13275000	FARSA	NM_004461.3	chr19	13040830	13068614	chr19	13091954	13098446	21	340	513	0.662768	225.341	2	5
chr19	12960000	13275000	FARSA	NM_004461.3	chr19	13040830	13068614	chr19	13142379	13151235	15	340	513	0.662768	225.341	2	7
chr19	12960000	13275000	FARSA	NM_004461.3	chr19	13040830	13068614	chr19	13160643	13177345	27	340	513	0.662768	225.341	2	4
chr19	12960000	13275000	FARSA	NM_004461.3	chr19	13040830	13068614	chr19	13181295	13191176	8	340	513	0.662768	225.341	2	12
chr19	12960000	13275000	FARSA	NM_004461.3	chr19	13040830	13068614	chr19	13217538	13219024	4	340	513	0.662768	225.341	2	16
chr19	12960000	13275000	FARSA	NM_004461.3	chr19	13040830	13068614	chr19	13219661	13221960	7	340	513	0.662768	225.341	2	13
chr19	12960000	13275000	FARSA	NM_004461.3	chr19	13040830	13068614	chr19	13242912	13244011	5	340	513	0.662768	225.341	2	15
chr19	12960000	13275000	FARSA	NM_004461.3	chr19	13040830	13068614	chr19	13244972	13246260	4	340	513	0.662768	225.341	2	16
chr19	12960000	13275000	FARSA	NM_004461.3	chr19	13040830	13068614	chr19	13253568	13255662	6	340	513	0.662768	225.341	2	14
chr19	12960000	13275000	FARSA	NM_004461.3	chr19	13040830	13068614	chr19	13270927	13276769	52	340	513	0.662768	225.341	2	2
chr11	65270000	65290000	FAU	NM_001997.5	chr11	64887932	64890982	chr11	65263078	65280458	25	25	254	0.0984252	2.46063	11	1
chr10	5580000	5615000	FBH1	NM_001258452.2	chr10	5585923	5594543	chr10	5927366	5933635	8	12	39	0.307692	3.69231	8	1
chr10	5580000	5615000	FBH1	NM_001258452.2	chr10	5594844	5598238	chr10	5927366	5933635	4	12	39	0.307692	3.69231	8	2
chr10	5580000	5615000	FBH1	NM_001258453.2	chr10	5594844	5598238	chr10	5927366	5933635	4	12	39	0.307692	3.69231	8	2
chr10	5580000	5615000	FBH1	NM_001258453.2	chr10	5585923	5594543	chr10	5927366	5933635	8	12	39	0.307692	3.69231	8	1
chr10	5580000	5615000	FBH1	NM_178150.3	chr10	5585923	5594543	chr10	5927366	5933635	8	12	39	0.307692	3.69231	8	1
chr10	5580000	5615000	FBH1	NM_178150.3	chr10	5594844	5598238	chr10	5927366	5933635	4	12	39	0.307692	3.69231	8	2
chr10	5670000	5735000	FBH1	NM_001258452.2	chr10	5700589	5702628	chr10	5927366	5933635	3	3	39	0.0769231	0.230769	5	1
chr10	5670000	5735000	FBH1	NM_001258453.2	chr10	5700589	5702628	chr10	5927366	5933635	3	3	39	0.0769231	0.230769	5	1
chr10	5670000	5735000	FBH1	NM_178150.3	chr10	5700589	5702628	chr10	5927366	5933635	3	3	39	0.0769231	0.230769	5	1
chr17	37435000	38350000	FBXL20	NM_001184906.2	chr17	37432275	37441394	chr17	37546206	37584513	6	124	165	0.751515	93.1879	2	4
chr17	37435000	38350000	FBXL20	NM_001184906.2	chr17	37512244	37525129	chr17	37546206	37584513	25	124	165	0.751515	93.1879	2	3
chr17	37435000	38350000	FBXL20	NM_001184906.2	chr17	37527421	37539649	chr17	37546206	37584513	28	124	165	0.751515	93.1879	2	2
chr17	37435000	38350000	FBXL20	NM_001184906.2	chr17	37546206	37584513	chr17	37584997	37600537	59	124	165	0.751515	93.1879	2	1
chr17	37435000	38350000	FBXL20	NM_001184906.2	chr17	37546206	37584513	chr17	37961166	37978649	6	124	165	0.751515	93.1879	2	4
chr17	37435000	38350000	FBXL20	NM_001370208.1	chr17	37432275	37441394	chr17	37546206	37584513	6	124	165	0.751515	93.1879	2	4
chr17	37435000	38350000	FBXL20	NM_001370208.1	chr17	37512244	37525129	chr17	37546206	37584513	25	124	165	0.751515	93.1879	2	3
chr17	37435000	38350000	FBXL20	NM_001370208.1	chr17	37527421	37539649	chr17	37546206	37584513	28	124	165	0.751515	93.1879	2	2
chr17	37435000	38350000	FBXL20	NM_001370208.1	chr17	37546206	37584513	chr17	37584997	37600537	59	124	165	0.751515	93.1879	2	1
chr17	37435000	38350000	FBXL20	NM_001370208.1	chr17	37546206	37584513	chr17	37961166	37978649	6	124	165	0.751515	93.1879	2	4
chr17	37435000	38350000	FBXL20	NM_001370209.1	chr17	37432275	37441394	chr17	37546206	37584513	6	124	165	0.751515	93.1879	2	4
chr17	37435000	38350000	FBXL20	NM_001370209.1	chr17	37512244	37525129	chr17	37546206	37584513	25	124	165	0.751515	93.1879	2	3
chr17	37435000	38350000	FBXL20	NM_001370209.1	chr17	37527421	37539649	chr17	37546206	37584513	28	124	165	0.751515	93.1879	2	2
chr17	37435000	38350000	FBXL20	NM_001370209.1	chr17	37546206	37584513	chr17	37584997	37600537	59	124	165	0.751515	93.1879	2	1
chr17	37435000	38350000	FBXL20	NM_001370209.1	chr17	37546206	37584513	chr17	37961166	37978649	6	124	165	0.751515	93.1879	2	4
chr17	37435000	38350000	FBXL20	NM_032875.3	chr17	37432275	37441394	chr17	37546206	37584513	6	124	165	0.751515	93.1879	2	4
chr17	37435000	38350000	FBXL20	NM_032875.3	chr17	37512244	37525129	chr17	37546206	37584513	25	124	165	0.751515	93.1879	2	3
chr17	37435000	38350000	FBXL20	NM_032875.3	chr17	37527421	37539649	chr17	37546206	37584513	28	124	165	0.751515	93.1879	2	2
chr17	37435000	38350000	FBXL20	NM_032875.3	chr17	37546206	37584513	chr17	37584997	37600537	59	124	165	0.751515	93.1879	2	1
chr17	37435000	38350000	FBXL20	NM_032875.3	chr17	37546206	37584513	chr17	37961166	37978649	6	124	165	0.751515	93.1879	2	4
chr11	72895000	72925000	FCHSD2	NM_014824.3	chr11	72849890	72855336	chr11	72900568	72909187	11	11	21	0.52381	5.7619	4	1
chr1	155040000	155155000	FDPS	NM_001135821.2	chr1	155077656	155078983	chr1	155274931	155280339	4	4	96	0.0416667	0.166667	14	1
chr1	155040000	155155000	FDPS	NM_001135822.2	chr1	155077656	155078983	chr1	155274931	155280339	4	4	96	0.0416667	0.166667	14	1
chr1	155040000	155155000	FDPS	NM_001242824.2	chr1	155077656	155078983	chr1	155274931	155280339	4	4	96	0.0416667	0.166667	14	1
chr1	155040000	155155000	FDPS	NM_001242825.2	chr1	155077656	155078983	chr1	155274931	155280339	4	4	96	0.0416667	0.166667	14	1
chr1	155040000	155155000	FDPS	NM_001378424.1	chr1	155077656	155078983	chr1	155274931	155280339	4	4	96	0.0416667	0.166667	14	1
chr1	155040000	155155000	FDPS	NM_001378425.1	chr1	155077656	155078983	chr1	155274931	155280339	4	4	96	0.0416667	0.166667	14	1
chr1	155040000	155155000	FDPS	NM_002004.4	chr1	155077656	155078983	chr1	155274931	155280339	4	4	96	0.0416667	0.166667	14	1
chr11	61245000	61430000	FEN1	NM_004111.6	chr11	61263139	61265685	chr11	61558971	61561244	3	12	97	0.123711	1.48454	4	1
chr11	61245000	61430000	FEN1	NM_004111.6	chr11	61278335	61282795	chr11	61558971	61561244	3	12	97	0.123711	1.48454	4	1
chr11	61245000	61430000	FEN1	NM_004111.6	chr11	61299141	61303719	chr11	61558971	61561244	3	12	97	0.123711	1.48454	4	1
chr11	61245000	61430000	FEN1	NM_004111.6	chr11	61393157	61396325	chr11	61558971	61561244	3	12	97	0.123711	1.48454	4	1
chr4	153970000	154005000	FHDC1	NM_001371116.1	chr4	153856345	153860507	chr4	153982696	153989263	6	6	42	0.142857	0.857143	2	1
chr4	153970000	154005000	FHDC1	NM_033393.3	chr4	153856345	153860507	chr4	153982696	153989263	6	6	42	0.142857	0.857143	2	1
chr11	65270000	65290000	FIBP	NM_004214.5	chr11	65263078	65280458	chr11	65654692	65661965	17	17	75	0.226667	3.85333	9	1
chr11	65270000	65290000	FIBP	NM_198897.2	chr11	65263078	65280458	chr11	65654692	65661965	17	17	75	0.226667	3.85333	9	1
chr11	65270000	65290000	FKBP2	NM_001135208.2	chr11	64004614	64015898	chr11	65263078	65280458	4	4	59	0.0677966	0.271186	39	1
chr11	65270000	65290000	FKBP2	NM_001370360.1	chr11	64004614	64015898	chr11	65263078	65280458	4	4	59	0.0677966	0.271186	39	1
chr11	65270000	65290000	FKBP2	NM_001370362.1	chr11	64004614	64015898	chr11	65263078	65280458	4	4	59	0.0677966	0.271186	39	1
chr11	65270000	65290000	FKBP2	NM_001370363.1	chr11	64004614	64015898	chr11	65263078	65280458	4	4	59	0.0677966	0.271186	39	1
chr11	65270000	65290000	FKBP2	NM_001370365.1	chr11	64004614	64015898	chr11	65263078	65280458	4	4	59	0.0677966	0.271186	39	1
chr11	65270000	65290000	FKBP2	NM_001370367.1	chr11	64004614	64015898	chr11	65263078	65280458	4	4	59	0.0677966	0.271186	39	1
chr11	65270000	65290000	FKBP2	NM_004470.4	chr11	64004614	64015898	chr11	65263078	65280458	4	4	59	0.0677966	0.271186	39	1
chr11	65270000	65290000	FKBP2	NM_057092.2	chr11	64004614	64015898	chr11	65263078	65280458	4	4	59	0.0677966	0.271186	39	1
chr17	27430000	27540000	FLOT2	NM_001330170.2	chr17	27222518	27226493	chr17	27470591	27488148	5	5	23	0.217391	1.08696	6	1
chr17	27430000	27540000	FLOT2	NM_004475.3	chr17	27222518	27226493	chr17	27470591	27488148	5	5	23	0.217391	1.08696	6	1
chr3	172210000	172390000	FNDC3B	NM_001135095.2	chr3	171756037	171761194	chr3	172277434	172283204	4	4	31	0.129032	0.516129	3	1
chr3	172210000	172390000	FNDC3B	NM_022763.4	chr3	171756037	171761194	chr3	172277434	172283204	4	4	31	0.129032	0.516129	3	1
chr14	37690000	38155000	FOXA1	NM_004496.5	chr14	37692770	37694232	chr14	38056716	38074457	8	1646	1749	0.941109	1549.07	1	16
chr14	37690000	38155000	FOXA1	NM_004496.5	chr14	37701672	37703189	chr14	38056716	38074457	13	1646	1749	0.941109	1549.07	1	14
chr14	37690000	38155000	FOXA1	NM_004496.5	chr14	37708903	37710225	chr14	38056716	38074457	7	1646	1749	0.941109	1549.07	1	17
chr14	37690000	38155000	FOXA1	NM_004496.5	chr14	37715291	37717992	chr14	38056716	38074457	41	1646	1749	0.941109	1549.07	1	9
chr14	37690000	38155000	FOXA1	NM_004496.5	chr14	37731205	37733299	chr14	38056716	38074457	16	1646	1749	0.941109	1549.07	1	13
chr14	37690000	38155000	FOXA1	NM_004496.5	chr14	37746273	37748696	chr14	38056716	38074457	5	1646	1749	0.941109	1549.07	1	19
chr14	37690000	38155000	FOXA1	NM_004496.5	chr14	37798154	37799814	chr14	38056716	38074457	7	1646	1749	0.941109	1549.07	1	17
chr14	37690000	38155000	FOXA1	NM_004496.5	chr14	37837754	37839411	chr14	38056716	38074457	3	1646	1749	0.941109	1549.07	1	21
chr14	37690000	38155000	FOXA1	NM_004496.5	chr14	37842445	37844627	chr14	38056716	38074457	4	1646	1749	0.941109	1549.07	1	20
chr14	37690000	38155000	FOXA1	NM_004496.5	chr14	37880207	37882899	chr14	38056716	38074457	4	1646	1749	0.941109	1549.07	1	20
chr14	37690000	38155000	FOXA1	NM_004496.5	chr14	37897743	37900846	chr14	38056716	38074457	3	1646	1749	0.941109	1549.07	1	21
chr14	37690000	38155000	FOXA1	NM_004496.5	chr14	37905101	37909544	chr14	38056716	38074457	10	1646	1749	0.941109	1549.07	1	15
chr14	37690000	38155000	FOXA1	NM_004496.5	chr14	37934298	37936561	chr14	38056716	38074457	6	1646	1749	0.941109	1549.07	1	18
chr14	37690000	38155000	FOXA1	NM_004496.5	chr14	37995823	37999916	chr14	38056716	38074457	22	1646	1749	0.941109	1549.07	1	10
chr14	37690000	38155000	FOXA1	NM_004496.5	chr14	38012719	38017057	chr14	38056716	38074457	73	1646	1749	0.941109	1549.07	1	7
chr14	37690000	38155000	FOXA1	NM_004496.5	chr14	38032717	38033807	chr14	38056716	38074457	120	1646	1749	0.941109	1549.07	1	2
chr14	37690000	38155000	FOXA1	NM_004496.5	chr14	38035826	38037007	chr14	38056716	38074457	119	1646	1749	0.941109	1549.07	1	3
chr14	37690000	38155000	FOXA1	NM_004496.5	chr14	38050466	38056281	chr14	38056716	38074457	735	1646	1749	0.941109	1549.07	1	1
chr14	37690000	38155000	FOXA1	NM_004496.5	chr14	38056716	38074457	chr14	38075420	38081775	96	1646	1749	0.941109	1549.07	1	6
chr14	37690000	38155000	FOXA1	NM_004496.5	chr14	38056716	38074457	chr14	38084950	38095555	102	1646	1749	0.941109	1549.07	1	5
chr14	37690000	38155000	FOXA1	NM_004496.5	chr14	38056716	38074457	chr14	38105974	38107697	41	1646	1749	0.941109	1549.07	1	9
chr14	37690000	38155000	FOXA1	NM_004496.5	chr14	38056716	38074457	chr14	38109985	38111328	19	1646	1749	0.941109	1549.07	1	12
chr14	37690000	38155000	FOXA1	NM_004496.5	chr14	38056716	38074457	chr14	38113515	38116452	43	1646	1749	0.941109	1549.07	1	8
chr14	37690000	38155000	FOXA1	NM_004496.5	chr14	38056716	38074457	chr14	38117584	38121204	112	1646	1749	0.941109	1549.07	1	4
chr14	37690000	38155000	FOXA1	NM_004496.5	chr14	38056716	38074457	chr14	38123449	38126061	21	1646	1749	0.941109	1549.07	1	11
chr14	37690000	38155000	FOXA1	NM_004496.5	chr14	38056716	38074457	chr14	38126463	38128309	16	1646	1749	0.941109	1549.07	1	13
chr17	27430000	27540000	FOXN1	NM_003593.3	chr17	26850754	26855918	chr17	27441580	27456150	3	3	91	0.032967	0.0989011	13	1
chr11	65270000	65290000	FRMD8	NM_001300832.3	chr11	65147566	65154553	chr11	65263078	65280458	258	264	1218	0.216749	57.2217	1	1
chr11	65270000	65290000	FRMD8	NM_001300832.3	chr11	65147566	65154553	chr11	65282579	65284283	6	264	1218	0.216749	57.2217	1	2
chr11	65270000	65290000	FRMD8	NM_001300833.3	chr11	65147566	65154553	chr11	65263078	65280458	258	264	1218	0.216749	57.2217	1	1
chr11	65270000	65290000	FRMD8	NM_001300833.3	chr11	65147566	65154553	chr11	65282579	65284283	6	264	1218	0.216749	57.2217	1	2
chr11	65270000	65290000	FRMD8	NM_031904.5	chr11	65147566	65154553	chr11	65263078	65280458	258	264	1218	0.216749	57.2217	1	1
chr11	65270000	65290000	FRMD8	NM_031904.5	chr11	65147566	65154553	chr11	65282579	65284283	6	264	1218	0.216749	57.2217	1	2
chr11	61245000	61430000	FTH1	NM_002032.3	chr11	61299141	61303719	chr11	61727905	61736736	3	16	606	0.0264026	0.422442	8	3
chr11	61245000	61430000	FTH1	NM_002032.3	chr11	61353876	61358993	chr11	61727905	61736736	6	16	606	0.0264026	0.422442	8	1
chr11	61245000	61430000	FTH1	NM_002032.3	chr11	61367975	61371977	chr11	61727905	61736736	3	16	606	0.0264026	0.422442	8	3
chr11	61245000	61430000	FTH1	NM_002032.3	chr11	61393157	61396325	chr11	61727905	61736736	4	16	606	0.0264026	0.422442	8	2
chr11	77890000	77960000	GAB2	NM_080491.3	chr11	77915173	77922074	chr11	78123868	78137286	6	38	304	0.125	4.75	2	2
chr11	77890000	77960000	GAB2	NM_080491.3	chr11	77922993	77932038	chr11	78123868	78137286	5	38	304	0.125	4.75	2	3
chr11	77890000	77960000	GAB2	NM_080491.3	chr11	77933027	77945093	chr11	78123868	78137286	24	38	304	0.125	4.75	2	1
chr11	77890000	77960000	GAB2	NM_080491.3	chr11	77950329	77952089	chr11	78123868	78137286	3	38	304	0.125	4.75	2	4
chr11	77975000	78025000	GAB2	NM_080491.3	chr11	78000221	78002210	chr11	78123868	78137286	8	43	304	0.141447	6.08224	1	3
chr11	77975000	78025000	GAB2	NM_080491.3	chr11	78004690	78011192	chr11	78123868	78137286	15	43	304	0.141447	6.08224	1	1
chr11	77975000	78025000	GAB2	NM_080491.3	chr11	78014974	78017614	chr11	78123868	78137286	6	43	304	0.141447	6.08224	1	4
chr11	77975000	78025000	GAB2	NM_080491.3	chr11	77977171	77979360	chr11	78123868	78137286	4	43	304	0.141447	6.08224	1	5
chr11	77975000	78025000	GAB2	NM_080491.3	chr11	78018626	78026384	chr11	78123868	78137286	10	43	304	0.141447	6.08224	1	2
chr19	12960000	13275000	GADD45GIP1	NM_052850.4	chr19	12975158	12980310	chr19	13040830	13068614	14	340	513	0.662768	225.341	2	8
chr19	12960000	13275000	GADD45GIP1	NM_052850.4	chr19	12980787	12982198	chr19	13040830	13068614	7	340	513	0.662768	225.341	2	13
chr19	12960000	13275000	GADD45GIP1	NM_052850.4	chr19	12982805	12986445	chr19	13040830	13068614	9	340	513	0.662768	225.341	2	11
chr19	12960000	13275000	GADD45GIP1	NM_052850.4	chr19	13003938	13005229	chr19	13040830	13068614	10	340	513	0.662768	225.341	2	10
chr19	12960000	13275000	GADD45GIP1	NM_052850.4	chr19	13018875	13020443	chr19	13040830	13068614	11	340	513	0.662768	225.341	2	9
chr19	12960000	13275000	GADD45GIP1	NM_052850.4	chr19	13034663	13035985	chr19	13040830	13068614	21	340	513	0.662768	225.341	2	5
chr19	12960000	13275000	GADD45GIP1	NM_052850.4	chr19	13039070	13040386	chr19	13040830	13068614	30	340	513	0.662768	225.341	2	3
chr19	12960000	13275000	GADD45GIP1	NM_052850.4	chr19	13040830	13068614	chr19	13073250	13074338	17	340	513	0.662768	225.341	2	6
chr19	12960000	13275000	GADD45GIP1	NM_052850.4	chr19	13040830	13068614	chr19	13074978	13079094	62	340	513	0.662768	225.341	2	1
chr19	12960000	13275000	GADD45GIP1	NM_052850.4	chr19	13040830	13068614	chr19	13088315	13090347	10	340	513	0.662768	225.341	2	10
chr19	12960000	13275000	GADD45GIP1	NM_052850.4	chr19	13040830	13068614	chr19	13091954	13098446	21	340	513	0.662768	225.341	2	5
chr19	12960000	13275000	GADD45GIP1	NM_052850.4	chr19	13040830	13068614	chr19	13142379	13151235	15	340	513	0.662768	225.341	2	7
chr19	12960000	13275000	GADD45GIP1	NM_052850.4	chr19	13040830	13068614	chr19	13160643	13177345	27	340	513	0.662768	225.341	2	4
chr19	12960000	13275000	GADD45GIP1	NM_052850.4	chr19	13040830	13068614	chr19	13181295	13191176	8	340	513	0.662768	225.341	2	12
chr19	12960000	13275000	GADD45GIP1	NM_052850.4	chr19	13040830	13068614	chr19	13217538	13219024	4	340	513	0.662768	225.341	2	16
chr19	12960000	13275000	GADD45GIP1	NM_052850.4	chr19	13040830	13068614	chr19	13219661	13221960	7	340	513	0.662768	225.341	2	13
chr19	12960000	13275000	GADD45GIP1	NM_052850.4	chr19	13040830	13068614	chr19	13242912	13244011	5	340	513	0.662768	225.341	2	15
chr19	12960000	13275000	GADD45GIP1	NM_052850.4	chr19	13040830	13068614	chr19	13244972	13246260	4	340	513	0.662768	225.341	2	16
chr19	12960000	13275000	GADD45GIP1	NM_052850.4	chr19	13040830	13068614	chr19	13253568	13255662	6	340	513	0.662768	225.341	2	14
chr19	12960000	13275000	GADD45GIP1	NM_052850.4	chr19	13040830	13068614	chr19	13270927	13276769	52	340	513	0.662768	225.341	2	2
chr10	9050000	9230000	GATA3	NM_001002295.2	chr10	8086512	8107603	chr10	9051507	9053088	3	864	4984	0.173355	149.778	1	13
chr10	9050000	9230000	GATA3	NM_001002295.2	chr10	8086512	8107603	chr10	9075895	9077659	37	864	4984	0.173355	149.778	1	6
chr10	9050000	9230000	GATA3	NM_001002295.2	chr10	8086512	8107603	chr10	9078884	9081461	25	864	4984	0.173355	149.778	1	7
chr10	9050000	9230000	GATA3	NM_001002295.2	chr10	8086512	8107603	chr10	9086839	9088178	17	864	4984	0.173355	149.778	1	11
chr10	9050000	9230000	GATA3	NM_001002295.2	chr10	8086512	8107603	chr10	9092940	9096472	18	864	4984	0.173355	149.778	1	10
chr10	9050000	9230000	GATA3	NM_001002295.2	chr10	8086512	8107603	chr10	9100758	9104764	40	864	4984	0.173355	149.778	1	5
chr10	9050000	9230000	GATA3	NM_001002295.2	chr10	8086512	8107603	chr10	9107152	9112395	140	864	4984	0.173355	149.778	1	2
chr10	9050000	9230000	GATA3	NM_001002295.2	chr10	8086512	8107603	chr10	9114642	9117421	52	864	4984	0.173355	149.778	1	3
chr10	9050000	9230000	GATA3	NM_001002295.2	chr10	8086512	8107603	chr10	9138674	9141342	10	864	4984	0.173355	149.778	1	12
chr10	9050000	9230000	GATA3	NM_001002295.2	chr10	8086512	8107603	chr10	9150447	9155106	47	864	4984	0.173355	149.778	1	4
chr10	9050000	9230000	GATA3	NM_001002295.2	chr10	8086512	8107603	chr10	9191658	9193536	20	864	4984	0.173355	149.778	1	9
chr10	9050000	9230000	GATA3	NM_001002295.2	chr10	8086512	8107603	chr10	9220081	9221912	23	864	4984	0.173355	149.778	1	8
chr10	9050000	9230000	GATA3	NM_001002295.2	chr10	8086512	8107603	chr10	9227901	9231137	432	864	4984	0.173355	149.778	1	1
chr10	9050000	9230000	GATA3	NM_002051.3	chr10	8086512	8107603	chr10	9051507	9053088	3	864	4984	0.173355	149.778	1	13
chr10	9050000	9230000	GATA3	NM_002051.3	chr10	8086512	8107603	chr10	9075895	9077659	37	864	4984	0.173355	149.778	1	6
chr10	9050000	9230000	GATA3	NM_002051.3	chr10	8086512	8107603	chr10	9078884	9081461	25	864	4984	0.173355	149.778	1	7
chr10	9050000	9230000	GATA3	NM_002051.3	chr10	8086512	8107603	chr10	9086839	9088178	17	864	4984	0.173355	149.778	1	11
chr10	9050000	9230000	GATA3	NM_002051.3	chr10	8086512	8107603	chr10	9092940	9096472	18	864	4984	0.173355	149.778	1	10
chr10	9050000	9230000	GATA3	NM_002051.3	chr10	8086512	8107603	chr10	9100758	9104764	40	864	4984	0.173355	149.778	1	5
chr10	9050000	9230000	GATA3	NM_002051.3	chr10	8086512	8107603	chr10	9107152	9112395	140	864	4984	0.173355	149.778	1	2
chr10	9050000	9230000	GATA3	NM_002051.3	chr10	8086512	8107603	chr10	9114642	9117421	52	864	4984	0.173355	149.778	1	3
chr10	9050000	9230000	GATA3	NM_002051.3	chr10	8086512	8107603	chr10	9138674	9141342	10	864	4984	0.173355	149.778	1	12
chr10	9050000	9230000	GATA3	NM_002051.3	chr10	8086512	8107603	chr10	9150447	9155106	47	864	4984	0.173355	149.778	1	4
chr10	9050000	9230000	GATA3	NM_002051.3	chr10	8086512	8107603	chr10	9191658	9193536	20	864	4984	0.173355	149.778	1	9
chr10	9050000	9230000	GATA3	NM_002051.3	chr10	8086512	8107603	chr10	9220081	9221912	23	864	4984	0.173355	149.778	1	8
chr10	9050000	9230000	GATA3	NM_002051.3	chr10	8086512	8107603	chr10	9227901	9231137	432	864	4984	0.173355	149.778	1	1
chr1	155040000	155155000	GBA	NM_000157.4	chr1	155063372	155068587	chr1	155210030	155216740	7	13	172	0.0755814	0.982558	11	1
chr1	155040000	155155000	GBA	NM_000157.4	chr1	155088467	155094190	chr1	155210030	155216740	6	13	172	0.0755814	0.982558	11	2
chr1	155040000	155155000	GBA	NM_001005741.3	chr1	155063372	155068587	chr1	155210030	155216740	7	13	172	0.0755814	0.982558	11	1
chr1	155040000	155155000	GBA	NM_001005741.3	chr1	155088467	155094190	chr1	155210030	155216740	6	13	172	0.0755814	0.982558	11	2
chr1	155040000	155155000	GBA	NM_001005742.3	chr1	155088467	155094190	chr1	155210030	155216740	6	13	172	0.0755814	0.982558	11	2
chr1	155040000	155155000	GBA	NM_001005742.3	chr1	155063372	155068587	chr1	155210030	155216740	7	13	172	0.0755814	0.982558	11	1
chr1	155040000	155155000	GBA	NM_001171811.2	chr1	155063372	155068587	chr1	155210030	155216740	7	13	172	0.0755814	0.982558	11	1
chr1	155040000	155155000	GBA	NM_001171811.2	chr1	155088467	155094190	chr1	155210030	155216740	6	13	172	0.0755814	0.982558	11	2
chr1	155040000	155155000	GBA	NM_001171812.2	chr1	155063372	155068587	chr1	155210030	155216740	7	13	172	0.0755814	0.982558	11	1
chr1	155040000	155155000	GBA	NM_001171812.2	chr1	155088467	155094190	chr1	155210030	155216740	6	13	172	0.0755814	0.982558	11	2
chr19	12960000	13275000	GCDH	NM_000159.4	chr19	12975158	12980310	chr19	12988866	13002942	30	117	179	0.653631	76.4749	4	1
chr19	12960000	13275000	GCDH	NM_000159.4	chr19	12980787	12982198	chr19	12988866	13002942	14	117	179	0.653631	76.4749	4	4
chr19	12960000	13275000	GCDH	NM_000159.4	chr19	12982805	12986445	chr19	12988866	13002942	22	117	179	0.653631	76.4749	4	2
chr19	12960000	13275000	GCDH	NM_000159.4	chr19	12988866	13002942	chr19	13039070	13040386	8	117	179	0.653631	76.4749	4	6
chr19	12960000	13275000	GCDH	NM_000159.4	chr19	12988866	13002942	chr19	13074978	13079094	15	117	179	0.653631	76.4749	4	3
chr19	12960000	13275000	GCDH	NM_000159.4	chr19	12988866	13002942	chr19	13091954	13098446	6	117	179	0.653631	76.4749	4	7
chr19	12960000	13275000	GCDH	NM_000159.4	chr19	12988866	13002942	chr19	13142379	13151235	5	117	179	0.653631	76.4749	4	8
chr19	12960000	13275000	GCDH	NM_000159.4	chr19	12988866	13002942	chr19	13219661	13221960	3	117	179	0.653631	76.4749	4	10
chr19	12960000	13275000	GCDH	NM_000159.4	chr19	12988866	13002942	chr19	13244972	13246260	4	117	179	0.653631	76.4749	4	9
chr19	12960000	13275000	GCDH	NM_000159.4	chr19	12988866	13002942	chr19	13270927	13276769	10	117	179	0.653631	76.4749	4	5
chr19	12960000	13275000	GCDH	NM_013976.5	chr19	12975158	12980310	chr19	12988866	13002942	30	117	179	0.653631	76.4749	4	1
chr19	12960000	13275000	GCDH	NM_013976.5	chr19	12980787	12982198	chr19	12988866	13002942	14	117	179	0.653631	76.4749	4	4
chr19	12960000	13275000	GCDH	NM_013976.5	chr19	12982805	12986445	chr19	12988866	13002942	22	117	179	0.653631	76.4749	4	2
chr19	12960000	13275000	GCDH	NM_013976.5	chr19	12988866	13002942	chr19	13039070	13040386	8	117	179	0.653631	76.4749	4	6
chr19	12960000	13275000	GCDH	NM_013976.5	chr19	12988866	13002942	chr19	13074978	13079094	15	117	179	0.653631	76.4749	4	3
chr19	12960000	13275000	GCDH	NM_013976.5	chr19	12988866	13002942	chr19	13091954	13098446	6	117	179	0.653631	76.4749	4	7
chr19	12960000	13275000	GCDH	NM_013976.5	chr19	12988866	13002942	chr19	13142379	13151235	5	117	179	0.653631	76.4749	4	8
chr19	12960000	13275000	GCDH	NM_013976.5	chr19	12988866	13002942	chr19	13219661	13221960	3	117	179	0.653631	76.4749	4	10
chr19	12960000	13275000	GCDH	NM_013976.5	chr19	12988866	13002942	chr19	13244972	13246260	4	117	179	0.653631	76.4749	4	9
chr19	12960000	13275000	GCDH	NM_013976.5	chr19	12988866	13002942	chr19	13270927	13276769	10	117	179	0.653631	76.4749	4	5
chr10	5580000	5615000	GDI2	NM_001115156.2	chr10	5585923	5594543	chr10	5851158	5857519	20	29	230	0.126087	3.65652	9	1
chr10	5580000	5615000	GDI2	NM_001115156.2	chr10	5594844	5598238	chr10	5851158	5857519	6	29	230	0.126087	3.65652	9	2
chr10	5580000	5615000	GDI2	NM_001115156.2	chr10	5601255	5602515	chr10	5851158	5857519	3	29	230	0.126087	3.65652	9	3
chr10	5580000	5615000	GDI2	NM_001494.4	chr10	5594844	5598238	chr10	5851158	5857519	6	29	230	0.126087	3.65652	9	2
chr10	5580000	5615000	GDI2	NM_001494.4	chr10	5601255	5602515	chr10	5851158	5857519	3	29	230	0.126087	3.65652	9	3
chr10	5580000	5615000	GDI2	NM_001494.4	chr10	5585923	5594543	chr10	5851158	5857519	20	29	230	0.126087	3.65652	9	1
chr10	5670000	5735000	GDI2	NM_001115156.2	chr10	5686731	5694939	chr10	5851158	5857519	8	19	230	0.0826087	1.56957	3	2
chr10	5670000	5735000	GDI2	NM_001115156.2	chr10	5673519	5675971	chr10	5851158	5857519	11	19	230	0.0826087	1.56957	3	1
chr10	5670000	5735000	GDI2	NM_001494.4	chr10	5686731	5694939	chr10	5851158	5857519	8	19	230	0.0826087	1.56957	3	2
chr10	5670000	5735000	GDI2	NM_001494.4	chr10	5673519	5675971	chr10	5851158	5857519	11	19	230	0.0826087	1.56957	3	1
chr10	5830000	5835000	GDI2	NM_001115156.2	chr10	5829139	5830317	chr10	5851158	5857519	14	14	230	0.0608696	0.852174	1	1
chr10	5830000	5835000	GDI2	NM_001494.4	chr10	5829139	5830317	chr10	5851158	5857519	14	14	230	0.0608696	0.852174	1	1
chr17	57855000	58625000	GDPD1	NM_001165993.2	chr17	57296281	57299630	chr17	57859950	57872352	4	48	92	0.521739	25.0435	15	2
chr17	57855000	58625000	GDPD1	NM_001165993.2	chr17	57296281	57299630	chr17	57852365	57856574	3	48	92	0.521739	25.0435	15	3
chr17	57855000	58625000	GDPD1	NM_001165993.2	chr17	57296281	57299630	chr17	57898568	57951001	41	48	92	0.521739	25.0435	15	1
chr17	57855000	58625000	GDPD1	NM_001165994.2	chr17	57296281	57299630	chr17	57859950	57872352	4	48	92	0.521739	25.0435	15	2
chr17	57855000	58625000	GDPD1	NM_001165994.2	chr17	57296281	57299630	chr17	57852365	57856574	3	48	92	0.521739	25.0435	15	3
chr17	57855000	58625000	GDPD1	NM_001165994.2	chr17	57296281	57299630	chr17	57898568	57951001	41	48	92	0.521739	25.0435	15	1
chr17	57855000	58625000	GDPD1	NM_182569.4	chr17	57296281	57299630	chr17	57898568	57951001	41	48	92	0.521739	25.0435	15	1
chr17	57855000	58625000	GDPD1	NM_182569.4	chr17	57296281	57299630	chr17	57852365	57856574	3	48	92	0.521739	25.0435	15	3
chr17	57855000	58625000	GDPD1	NM_182569.4	chr17	57296281	57299630	chr17	57859950	57872352	4	48	92	0.521739	25.0435	15	2
chr19	12960000	13275000	GET3	NM_001371488.1	chr19	12837107	12850044	chr19	12975158	12980310	17	71	327	0.217125	15.4159	8	1
chr19	12960000	13275000	GET3	NM_001371488.1	chr19	12837107	12850044	chr19	12982805	12986445	8	71	327	0.217125	15.4159	8	4
chr19	12960000	13275000	GET3	NM_001371488.1	chr19	12837107	12850044	chr19	13003938	13005229	4	71	327	0.217125	15.4159	8	6
chr19	12960000	13275000	GET3	NM_001371488.1	chr19	12837107	12850044	chr19	13018875	13020443	3	71	327	0.217125	15.4159	8	7
chr19	12960000	13275000	GET3	NM_001371488.1	chr19	12837107	12850044	chr19	13034663	13035985	4	71	327	0.217125	15.4159	8	6
chr19	12960000	13275000	GET3	NM_001371488.1	chr19	12837107	12850044	chr19	13074978	13079094	11	71	327	0.217125	15.4159	8	2
chr19	12960000	13275000	GET3	NM_001371488.1	chr19	12837107	12850044	chr19	13091954	13098446	3	71	327	0.217125	15.4159	8	7
chr19	12960000	13275000	GET3	NM_001371488.1	chr19	12837107	12850044	chr19	13160643	13177345	6	71	327	0.217125	15.4159	8	5
chr19	12960000	13275000	GET3	NM_001371488.1	chr19	12837107	12850044	chr19	13219661	13221960	3	71	327	0.217125	15.4159	8	7
chr19	12960000	13275000	GET3	NM_001371488.1	chr19	12837107	12850044	chr19	13238866	13240993	3	71	327	0.217125	15.4159	8	7
chr19	12960000	13275000	GET3	NM_001371488.1	chr19	12837107	12850044	chr19	13270927	13276769	9	71	327	0.217125	15.4159	8	3
chr19	12960000	13275000	GET3	NM_001371489.1	chr19	12837107	12850044	chr19	12975158	12980310	17	71	327	0.217125	15.4159	8	1
chr19	12960000	13275000	GET3	NM_001371489.1	chr19	12837107	12850044	chr19	12982805	12986445	8	71	327	0.217125	15.4159	8	4
chr19	12960000	13275000	GET3	NM_001371489.1	chr19	12837107	12850044	chr19	13003938	13005229	4	71	327	0.217125	15.4159	8	6
chr19	12960000	13275000	GET3	NM_001371489.1	chr19	12837107	12850044	chr19	13018875	13020443	3	71	327	0.217125	15.4159	8	7
chr19	12960000	13275000	GET3	NM_001371489.1	chr19	12837107	12850044	chr19	13034663	13035985	4	71	327	0.217125	15.4159	8	6
chr19	12960000	13275000	GET3	NM_001371489.1	chr19	12837107	12850044	chr19	13074978	13079094	11	71	327	0.217125	15.4159	8	2
chr19	12960000	13275000	GET3	NM_001371489.1	chr19	12837107	12850044	chr19	13091954	13098446	3	71	327	0.217125	15.4159	8	7
chr19	12960000	13275000	GET3	NM_001371489.1	chr19	12837107	12850044	chr19	13160643	13177345	6	71	327	0.217125	15.4159	8	5
chr19	12960000	13275000	GET3	NM_001371489.1	chr19	12837107	12850044	chr19	13219661	13221960	3	71	327	0.217125	15.4159	8	7
chr19	12960000	13275000	GET3	NM_001371489.1	chr19	12837107	12850044	chr19	13238866	13240993	3	71	327	0.217125	15.4159	8	7
chr19	12960000	13275000	GET3	NM_001371489.1	chr19	12837107	12850044	chr19	13270927	13276769	9	71	327	0.217125	15.4159	8	3
chr19	12960000	13275000	GET3	NM_004317.4	chr19	12837107	12850044	chr19	12975158	12980310	17	71	327	0.217125	15.4159	8	1
chr19	12960000	13275000	GET3	NM_004317.4	chr19	12837107	12850044	chr19	12982805	12986445	8	71	327	0.217125	15.4159	8	4
chr19	12960000	13275000	GET3	NM_004317.4	chr19	12837107	12850044	chr19	13003938	13005229	4	71	327	0.217125	15.4159	8	6
chr19	12960000	13275000	GET3	NM_004317.4	chr19	12837107	12850044	chr19	13018875	13020443	3	71	327	0.217125	15.4159	8	7
chr19	12960000	13275000	GET3	NM_004317.4	chr19	12837107	12850044	chr19	13034663	13035985	4	71	327	0.217125	15.4159	8	6
chr19	12960000	13275000	GET3	NM_004317.4	chr19	12837107	12850044	chr19	13074978	13079094	11	71	327	0.217125	15.4159	8	2
chr19	12960000	13275000	GET3	NM_004317.4	chr19	12837107	12850044	chr19	13091954	13098446	3	71	327	0.217125	15.4159	8	7
chr19	12960000	13275000	GET3	NM_004317.4	chr19	12837107	12850044	chr19	13160643	13177345	6	71	327	0.217125	15.4159	8	5
chr19	12960000	13275000	GET3	NM_004317.4	chr19	12837107	12850044	chr19	13219661	13221960	3	71	327	0.217125	15.4159	8	7
chr19	12960000	13275000	GET3	NM_004317.4	chr19	12837107	12850044	chr19	13238866	13240993	3	71	327	0.217125	15.4159	8	7
chr19	12960000	13275000	GET3	NM_004317.4	chr19	12837107	12850044	chr19	13270927	13276769	9	71	327	0.217125	15.4159	8	3
chr2	85770000	85865000	GGCX	NM_000821.7	chr2	85788076	85789307	chr2	85815304	85821080	50	102	157	0.649682	66.2675	3	2
chr2	85770000	85865000	GGCX	NM_000821.7	chr2	85772489	85780109	chr2	85788076	85789307	52	102	157	0.649682	66.2675	3	1
chr2	85770000	85865000	GGCX	NM_001142269.4	chr2	85772489	85780109	chr2	85788076	85789307	52	102	157	0.649682	66.2675	3	1
chr2	85770000	85865000	GGCX	NM_001142269.4	chr2	85788076	85789307	chr2	85815304	85821080	50	102	157	0.649682	66.2675	3	2
chr2	85770000	85865000	GGCX	NM_001311312.2	chr2	85788076	85789307	chr2	85815304	85821080	50	102	157	0.649682	66.2675	3	2
chr2	85770000	85865000	GGCX	NM_001311312.2	chr2	85772489	85780109	chr2	85788076	85789307	52	102	157	0.649682	66.2675	3	1
chr1	235120000	235300000	GGPS1	NM_001037277.1	chr1	235264655	235269604	chr1	235488183	235495898	9	13	121	0.107438	1.39669	3	1
chr1	235120000	235300000	GGPS1	NM_001037277.1	chr1	235246015	235247839	chr1	235488183	235495898	4	13	121	0.107438	1.39669	3	2
chr1	235120000	235300000	GGPS1	NM_001037278.2	chr1	235246015	235247839	chr1	235488183	235495898	4	13	121	0.107438	1.39669	3	2
chr1	235120000	235300000	GGPS1	NM_001037278.2	chr1	235264655	235269604	chr1	235488183	235495898	9	13	121	0.107438	1.39669	3	1
chr1	235120000	235300000	GGPS1	NM_001371477.1	chr1	235264655	235269604	chr1	235488183	235495898	9	13	121	0.107438	1.39669	3	1
chr1	235120000	235300000	GGPS1	NM_001371477.1	chr1	235246015	235247839	chr1	235488183	235495898	4	13	121	0.107438	1.39669	3	2
chr1	235120000	235300000	GGPS1	NM_001371478.1	chr1	235246015	235247839	chr1	235488183	235495898	4	13	121	0.107438	1.39669	3	2
chr1	235120000	235300000	GGPS1	NM_001371478.1	chr1	235264655	235269604	chr1	235488183	235495898	9	13	121	0.107438	1.39669	3	1
chr1	235120000	235300000	GGPS1	NM_004837.4	chr1	235264655	235269604	chr1	235488183	235495898	9	13	121	0.107438	1.39669	3	1
chr1	235120000	235300000	GGPS1	NM_004837.4	chr1	235246015	235247839	chr1	235488183	235495898	4	13	121	0.107438	1.39669	3	2
chr16	85660000	85690000	GINS2	NM_016095.3	chr16	85681973	85694473	chr16	85722187	85724878	12	12	131	0.0916031	1.09924	3	1
chr19	12960000	13275000	GIPC1	NM_005716.4	chr19	13270927	13276769	chr19	14604710	14609152	3	3	416	0.00721154	0.0216346	28	1
chr19	12960000	13275000	GIPC1	NM_202468.3	chr19	13270927	13276769	chr19	14604710	14609152	3	3	416	0.00721154	0.0216346	28	1
chr19	12960000	13275000	GIPC1	NM_202469.3	chr19	13270927	13276769	chr19	14604710	14609152	3	3	416	0.00721154	0.0216346	28	1
chr19	12960000	13275000	GIPC1	NM_202470.3	chr19	13270927	13276769	chr19	14604710	14609152	3	3	416	0.00721154	0.0216346	28	1
chr19	12960000	13275000	GIPC1	NM_202494.3	chr19	13270927	13276769	chr19	14604710	14609152	3	3	416	0.00721154	0.0216346	28	1
chr17	27430000	27540000	GOSR1	NM_001007024.2	chr17	27470591	27488148	chr17	28803502	28805637	3	3	16	0.1875	0.5625	10	1
chr17	27430000	27540000	GOSR1	NM_001007025.2	chr17	27470591	27488148	chr17	28803502	28805637	3	3	16	0.1875	0.5625	10	1
chr17	27430000	27540000	GOSR1	NM_004871.3	chr17	27470591	27488148	chr17	28803502	28805637	3	3	16	0.1875	0.5625	10	1
chr11	65270000	65290000	GPR137	NM_001378076.1	chr11	64034503	64043861	chr11	65263078	65280458	6	6	142	0.0422535	0.253521	40	1
chr11	65270000	65290000	GPR137	NM_001378078.1	chr11	64034503	64043861	chr11	65263078	65280458	6	6	142	0.0422535	0.253521	40	1
chr11	65270000	65290000	GPR137	NM_001378084.1	chr11	64034503	64043861	chr11	65263078	65280458	6	6	142	0.0422535	0.253521	40	1
chr3	149055000	149290000	GPR87	NM_023915.4	chr3	149101190	149107573	chr3	151032605	151039354	3	3	107	0.0280374	0.0841121	10	1
chr12	14940000	15170000	GPRC5A	NM_003979.4	chr12	13042493	13046750	chr12	14992493	14995483	3	3	526	0.00570342	0.0171103	9	1
chr8	102385000	102450000	GRHL2	NM_001330593.2	chr8	102384648	102385914	chr8	102500012	102510585	46	848	4680	0.181197	153.655	1	4
chr8	102385000	102450000	GRHL2	NM_001330593.2	chr8	102386519	102389718	chr8	102500012	102510585	102	848	4680	0.181197	153.655	1	2
chr8	102385000	102450000	GRHL2	NM_001330593.2	chr8	102397422	102402058	chr8	102500012	102510585	88	848	4680	0.181197	153.655	1	3
chr8	102385000	102450000	GRHL2	NM_001330593.2	chr8	102403390	102407007	chr8	102500012	102510585	39	848	4680	0.181197	153.655	1	5
chr8	102385000	102450000	GRHL2	NM_001330593.2	chr8	102407460	102410233	chr8	102500012	102510585	11	848	4680	0.181197	153.655	1	9
chr8	102385000	102450000	GRHL2	NM_001330593.2	chr8	102421541	102423229	chr8	102500012	102510585	28	848	4680	0.181197	153.655	1	7
chr8	102385000	102450000	GRHL2	NM_001330593.2	chr8	102435047	102437239	chr8	102500012	102510585	37	848	4680	0.181197	153.655	1	6
chr8	102385000	102450000	GRHL2	NM_001330593.2	chr8	102437768	102439161	chr8	102500012	102510585	19	848	4680	0.181197	153.655	1	8
chr8	102385000	102450000	GRHL2	NM_001330593.2	chr8	102446390	102451850	chr8	102500012	102510585	478	848	4680	0.181197	153.655	1	1
chr8	102385000	102450000	GRHL2	NM_024915.4	chr8	102384648	102385914	chr8	102500012	102510585	46	848	4680	0.181197	153.655	1	4
chr8	102385000	102450000	GRHL2	NM_024915.4	chr8	102386519	102389718	chr8	102500012	102510585	102	848	4680	0.181197	153.655	1	2
chr8	102385000	102450000	GRHL2	NM_024915.4	chr8	102397422	102402058	chr8	102500012	102510585	88	848	4680	0.181197	153.655	1	3
chr8	102385000	102450000	GRHL2	NM_024915.4	chr8	102403390	102407007	chr8	102500012	102510585	39	848	4680	0.181197	153.655	1	5
chr8	102385000	102450000	GRHL2	NM_024915.4	chr8	102407460	102410233	chr8	102500012	102510585	11	848	4680	0.181197	153.655	1	9
chr8	102385000	102450000	GRHL2	NM_024915.4	chr8	102421541	102423229	chr8	102500012	102510585	28	848	4680	0.181197	153.655	1	7
chr8	102385000	102450000	GRHL2	NM_024915.4	chr8	102435047	102437239	chr8	102500012	102510585	37	848	4680	0.181197	153.655	1	6
chr8	102385000	102450000	GRHL2	NM_024915.4	chr8	102437768	102439161	chr8	102500012	102510585	19	848	4680	0.181197	153.655	1	8
chr8	102385000	102450000	GRHL2	NM_024915.4	chr8	102446390	102451850	chr8	102500012	102510585	478	848	4680	0.181197	153.655	1	1
chr11	65270000	65290000	GRK2	NM_001619.5	chr11	65263078	65280458	chr11	67027781	67046887	4	4	445	0.00898876	0.0359551	56	1
chr16	85660000	85690000	GSE1	NM_001134473.3	chr16	85639433	85652326	chr16	85664298	85667212	8	191	1893	0.100898	19.2715	1	4
chr16	85660000	85690000	GSE1	NM_001134473.3	chr16	85639433	85652326	chr16	85668780	85676825	58	191	1893	0.100898	19.2715	1	2
chr16	85660000	85690000	GSE1	NM_001134473.3	chr16	85639433	85652326	chr16	85678481	85680199	45	191	1893	0.100898	19.2715	1	3
chr16	85660000	85690000	GSE1	NM_001134473.3	chr16	85639433	85652326	chr16	85681973	85694473	80	191	1893	0.100898	19.2715	1	1
chr16	85660000	85690000	GSE1	NM_001278184.3	chr16	85639433	85652326	chr16	85664298	85667212	8	191	1893	0.100898	19.2715	1	4
chr16	85660000	85690000	GSE1	NM_001278184.3	chr16	85639433	85652326	chr16	85668780	85676825	58	191	1893	0.100898	19.2715	1	2
chr16	85660000	85690000	GSE1	NM_001278184.3	chr16	85639433	85652326	chr16	85678481	85680199	45	191	1893	0.100898	19.2715	1	3
chr16	85660000	85690000	GSE1	NM_001278184.3	chr16	85639433	85652326	chr16	85681973	85694473	80	191	1893	0.100898	19.2715	1	1
chr16	85660000	85690000	GSE1	NM_014615.5	chr16	85639433	85652326	chr16	85664298	85667212	8	191	1893	0.100898	19.2715	1	4
chr16	85660000	85690000	GSE1	NM_014615.5	chr16	85639433	85652326	chr16	85668780	85676825	58	191	1893	0.100898	19.2715	1	2
chr16	85660000	85690000	GSE1	NM_014615.5	chr16	85639433	85652326	chr16	85678481	85680199	45	191	1893	0.100898	19.2715	1	3
chr16	85660000	85690000	GSE1	NM_014615.5	chr16	85639433	85652326	chr16	85681973	85694473	80	191	1893	0.100898	19.2715	1	1
chr8	30480000	30705000	GSR	NM_000637.5	chr8	30523806	30525640	chr8	30579313	30587462	15	220	281	0.782918	172.242	1	6
chr8	30480000	30705000	GSR	NM_000637.5	chr8	30532311	30534863	chr8	30579313	30587462	15	220	281	0.782918	172.242	1	6
chr8	30480000	30705000	GSR	NM_000637.5	chr8	30555393	30556490	chr8	30579313	30587462	35	220	281	0.782918	172.242	1	3
chr8	30480000	30705000	GSR	NM_000637.5	chr8	30557024	30558191	chr8	30579313	30587462	40	220	281	0.782918	172.242	1	2
chr8	30480000	30705000	GSR	NM_000637.5	chr8	30559503	30561617	chr8	30579313	30587462	34	220	281	0.782918	172.242	1	4
chr8	30480000	30705000	GSR	NM_000637.5	chr8	30572377	30574530	chr8	30579313	30587462	17	220	281	0.782918	172.242	1	5
chr8	30480000	30705000	GSR	NM_000637.5	chr8	30576870	30578563	chr8	30579313	30587462	51	220	281	0.782918	172.242	1	1
chr8	30480000	30705000	GSR	NM_000637.5	chr8	30579313	30587462	chr8	30645069	30647622	6	220	281	0.782918	172.242	1	8
chr8	30480000	30705000	GSR	NM_000637.5	chr8	30579313	30587462	chr8	30658824	30662867	7	220	281	0.782918	172.242	1	7
chr8	30480000	30705000	GSR	NM_001195102.3	chr8	30523806	30525640	chr8	30579313	30587462	15	220	281	0.782918	172.242	1	6
chr8	30480000	30705000	GSR	NM_001195102.3	chr8	30532311	30534863	chr8	30579313	30587462	15	220	281	0.782918	172.242	1	6
chr8	30480000	30705000	GSR	NM_001195102.3	chr8	30555393	30556490	chr8	30579313	30587462	35	220	281	0.782918	172.242	1	3
chr8	30480000	30705000	GSR	NM_001195102.3	chr8	30557024	30558191	chr8	30579313	30587462	40	220	281	0.782918	172.242	1	2
chr8	30480000	30705000	GSR	NM_001195102.3	chr8	30559503	30561617	chr8	30579313	30587462	34	220	281	0.782918	172.242	1	4
chr8	30480000	30705000	GSR	NM_001195102.3	chr8	30572377	30574530	chr8	30579313	30587462	17	220	281	0.782918	172.242	1	5
chr8	30480000	30705000	GSR	NM_001195102.3	chr8	30576870	30578563	chr8	30579313	30587462	51	220	281	0.782918	172.242	1	1
chr8	30480000	30705000	GSR	NM_001195102.3	chr8	30579313	30587462	chr8	30645069	30647622	6	220	281	0.782918	172.242	1	8
chr8	30480000	30705000	GSR	NM_001195102.3	chr8	30579313	30587462	chr8	30658824	30662867	7	220	281	0.782918	172.242	1	7
chr8	30480000	30705000	GSR	NM_001195103.3	chr8	30523806	30525640	chr8	30579313	30587462	15	220	281	0.782918	172.242	1	6
chr8	30480000	30705000	GSR	NM_001195103.3	chr8	30532311	30534863	chr8	30579313	30587462	15	220	281	0.782918	172.242	1	6
chr8	30480000	30705000	GSR	NM_001195103.3	chr8	30555393	30556490	chr8	30579313	30587462	35	220	281	0.782918	172.242	1	3
chr8	30480000	30705000	GSR	NM_001195103.3	chr8	30557024	30558191	chr8	30579313	30587462	40	220	281	0.782918	172.242	1	2
chr8	30480000	30705000	GSR	NM_001195103.3	chr8	30559503	30561617	chr8	30579313	30587462	34	220	281	0.782918	172.242	1	4
chr8	30480000	30705000	GSR	NM_001195103.3	chr8	30572377	30574530	chr8	30579313	30587462	17	220	281	0.782918	172.242	1	5
chr8	30480000	30705000	GSR	NM_001195103.3	chr8	30576870	30578563	chr8	30579313	30587462	51	220	281	0.782918	172.242	1	1
chr8	30480000	30705000	GSR	NM_001195103.3	chr8	30579313	30587462	chr8	30645069	30647622	6	220	281	0.782918	172.242	1	8
chr8	30480000	30705000	GSR	NM_001195103.3	chr8	30579313	30587462	chr8	30658824	30662867	7	220	281	0.782918	172.242	1	7
chr8	30480000	30705000	GSR	NM_001195104.3	chr8	30523806	30525640	chr8	30579313	30587462	15	220	281	0.782918	172.242	1	6
chr8	30480000	30705000	GSR	NM_001195104.3	chr8	30532311	30534863	chr8	30579313	30587462	15	220	281	0.782918	172.242	1	6
chr8	30480000	30705000	GSR	NM_001195104.3	chr8	30555393	30556490	chr8	30579313	30587462	35	220	281	0.782918	172.242	1	3
chr8	30480000	30705000	GSR	NM_001195104.3	chr8	30557024	30558191	chr8	30579313	30587462	40	220	281	0.782918	172.242	1	2
chr8	30480000	30705000	GSR	NM_001195104.3	chr8	30559503	30561617	chr8	30579313	30587462	34	220	281	0.782918	172.242	1	4
chr8	30480000	30705000	GSR	NM_001195104.3	chr8	30572377	30574530	chr8	30579313	30587462	17	220	281	0.782918	172.242	1	5
chr8	30480000	30705000	GSR	NM_001195104.3	chr8	30576870	30578563	chr8	30579313	30587462	51	220	281	0.782918	172.242	1	1
chr8	30480000	30705000	GSR	NM_001195104.3	chr8	30579313	30587462	chr8	30645069	30647622	6	220	281	0.782918	172.242	1	8
chr8	30480000	30705000	GSR	NM_001195104.3	chr8	30579313	30587462	chr8	30658824	30662867	7	220	281	0.782918	172.242	1	7
chr8	30480000	30705000	GTF2E2	NM_001348353.1	chr8	30511186	30519468	chr8	30523806	30525640	14	32	46	0.695652	22.2609	3	1
chr8	30480000	30705000	GTF2E2	NM_001348353.1	chr8	30511186	30519468	chr8	30645069	30647622	8	32	46	0.695652	22.2609	3	3
chr8	30480000	30705000	GTF2E2	NM_001348353.1	chr8	30511186	30519468	chr8	30658824	30662867	10	32	46	0.695652	22.2609	3	2
chr8	30480000	30705000	GTF2E2	NM_002095.6	chr8	30511186	30519468	chr8	30523806	30525640	14	32	46	0.695652	22.2609	3	1
chr8	30480000	30705000	GTF2E2	NM_002095.6	chr8	30511186	30519468	chr8	30645069	30647622	8	32	46	0.695652	22.2609	3	3
chr8	30480000	30705000	GTF2E2	NM_002095.6	chr8	30511186	30519468	chr8	30658824	30662867	10	32	46	0.695652	22.2609	3	2
chr19	17395000	17455000	GTPBP3	NM_001128855.3	chr19	17399998	17407884	chr19	17442965	17452305	23	127	180	0.705556	89.6056	2	3
chr19	17395000	17455000	GTPBP3	NM_001128855.3	chr19	17425652	17434402	chr19	17442965	17452305	41	127	180	0.705556	89.6056	2	2
chr19	17395000	17455000	GTPBP3	NM_001128855.3	chr19	17434812	17442518	chr19	17442965	17452305	63	127	180	0.705556	89.6056	2	1
chr19	17395000	17455000	GTPBP3	NM_001195422.1	chr19	17399998	17407884	chr19	17442965	17452305	23	127	180	0.705556	89.6056	2	3
chr19	17395000	17455000	GTPBP3	NM_001195422.1	chr19	17434812	17442518	chr19	17442965	17452305	63	127	180	0.705556	89.6056	2	1
chr19	17395000	17455000	GTPBP3	NM_001195422.1	chr19	17425652	17434402	chr19	17442965	17452305	41	127	180	0.705556	89.6056	2	2
chr19	17395000	17455000	GTPBP3	NM_032620.4	chr19	17425652	17434402	chr19	17442965	17452305	41	127	180	0.705556	89.6056	2	2
chr19	17395000	17455000	GTPBP3	NM_032620.4	chr19	17434812	17442518	chr19	17442965	17452305	63	127	180	0.705556	89.6056	2	1
chr19	17395000	17455000	GTPBP3	NM_032620.4	chr19	17399998	17407884	chr19	17442965	17452305	23	127	180	0.705556	89.6056	2	3
chr19	17395000	17455000	GTPBP3	NM_133644.4	chr19	17434812	17442518	chr19	17442965	17452305	63	127	180	0.705556	89.6056	2	1
chr19	17395000	17455000	GTPBP3	NM_133644.4	chr19	17399998	17407884	chr19	17442965	17452305	23	127	180	0.705556	89.6056	2	3
chr19	17395000	17455000	GTPBP3	NM_133644.4	chr19	17425652	17434402	chr19	17442965	17452305	41	127	180	0.705556	89.6056	2	2
chr3	149055000	149290000	GYG1	NM_001184720.2	chr3	148707084	148710872	chr3	149101190	149107573	3	3	12	0.25	0.75	6	1
chr3	149055000	149290000	GYG1	NM_001184721.2	chr3	148707084	148710872	chr3	149101190	149107573	3	3	12	0.25	0.75	6	1
chr3	149055000	149290000	GYG1	NM_004130.4	chr3	148707084	148710872	chr3	149101190	149107573	3	3	12	0.25	0.75	6	1
chr12	14940000	15170000	H2AJ	NM_177925.4	chr12	14925621	14931405	chr12	14962957	14965154	7	137	202	0.678218	92.9158	1	6
chr12	14940000	15170000	H2AJ	NM_177925.4	chr12	14925621	14931405	chr12	14971490	14973820	10	137	202	0.678218	92.9158	1	4
chr12	14940000	15170000	H2AJ	NM_177925.4	chr12	14925621	14931405	chr12	14988774	14989892	26	137	202	0.678218	92.9158	1	1
chr12	14940000	15170000	H2AJ	NM_177925.4	chr12	14925621	14931405	chr12	14992493	14995483	14	137	202	0.678218	92.9158	1	2
chr12	14940000	15170000	H2AJ	NM_177925.4	chr12	14925621	14931405	chr12	14997836	15000607	13	137	202	0.678218	92.9158	1	3
chr12	14940000	15170000	H2AJ	NM_177925.4	chr12	14925621	14931405	chr12	15001920	15004901	8	137	202	0.678218	92.9158	1	5
chr12	14940000	15170000	H2AJ	NM_177925.4	chr12	14925621	14931405	chr12	15021600	15022706	7	137	202	0.678218	92.9158	1	6
chr12	14940000	15170000	H2AJ	NM_177925.4	chr12	14925621	14931405	chr12	15031136	15035722	6	137	202	0.678218	92.9158	1	7
chr12	14940000	15170000	H2AJ	NM_177925.4	chr12	14925621	14931405	chr12	15053119	15060224	14	137	202	0.678218	92.9158	1	2
chr12	14940000	15170000	H2AJ	NM_177925.4	chr12	14925621	14931405	chr12	15087071	15089578	4	137	202	0.678218	92.9158	1	8
chr12	14940000	15170000	H2AJ	NM_177925.4	chr12	14925621	14931405	chr12	15097841	15100565	3	137	202	0.678218	92.9158	1	9
chr12	14940000	15170000	H2AJ	NM_177925.4	chr12	14925621	14931405	chr12	15100877	15102816	8	137	202	0.678218	92.9158	1	5
chr12	14940000	15170000	H2AJ	NM_177925.4	chr12	14925621	14931405	chr12	15136647	15139285	3	137	202	0.678218	92.9158	1	9
chr12	14940000	15170000	H2AJ	NM_177925.4	chr12	14925621	14931405	chr12	15152014	15153377	8	137	202	0.678218	92.9158	1	5
chr12	14940000	15170000	H2AJ	NM_177925.4	chr12	14925621	14931405	chr12	15153891	15156330	3	137	202	0.678218	92.9158	1	9
chr12	14940000	15170000	H2AJ	NM_177925.4	chr12	14925621	14931405	chr12	15156912	15159515	3	137	202	0.678218	92.9158	1	9
chr12	14940000	15170000	H4-16	NM_175054.2	chr12	14921303	14925357	chr12	14988774	14989892	15	78	129	0.604651	47.1628	4	1
chr12	14940000	15170000	H4-16	NM_175054.2	chr12	14921303	14925357	chr12	14992493	14995483	12	78	129	0.604651	47.1628	4	3
chr12	14940000	15170000	H4-16	NM_175054.2	chr12	14921303	14925357	chr12	14997836	15000607	11	78	129	0.604651	47.1628	4	4
chr12	14940000	15170000	H4-16	NM_175054.2	chr12	14921303	14925357	chr12	15001920	15004901	7	78	129	0.604651	47.1628	4	6
chr12	14940000	15170000	H4-16	NM_175054.2	chr12	14921303	14925357	chr12	15021600	15022706	8	78	129	0.604651	47.1628	4	5
chr12	14940000	15170000	H4-16	NM_175054.2	chr12	14921303	14925357	chr12	15053119	15060224	13	78	129	0.604651	47.1628	4	2
chr12	14940000	15170000	H4-16	NM_175054.2	chr12	14921303	14925357	chr12	15097841	15100565	3	78	129	0.604651	47.1628	4	7
chr12	14940000	15170000	H4-16	NM_175054.2	chr12	14921303	14925357	chr12	15152014	15153377	3	78	129	0.604651	47.1628	4	7
chr12	14940000	15170000	H4-16	NM_175054.2	chr12	14921303	14925357	chr12	15153891	15156330	3	78	129	0.604651	47.1628	4	7
chr12	14940000	15170000	H4-16	NM_175054.2	chr12	14921303	14925357	chr12	15156912	15159515	3	78	129	0.604651	47.1628	4	7
chr19	17395000	17455000	HAUS8	NM_001011699.1	chr19	17184065	17191589	chr19	17434812	17442518	7	12	105	0.114286	1.37143	6	1
chr19	17395000	17455000	HAUS8	NM_001011699.1	chr19	17184065	17191589	chr19	17399998	17407884	5	12	105	0.114286	1.37143	6	2
chr19	17395000	17455000	HAUS8	NM_033417.2	chr19	17184065	17191589	chr19	17399998	17407884	5	12	105	0.114286	1.37143	6	2
chr19	17395000	17455000	HAUS8	NM_033417.2	chr19	17184065	17191589	chr19	17434812	17442518	7	12	105	0.114286	1.37143	6	1
chr17	57855000	58625000	HEATR6	NM_022070.5	chr17	58154014	58161089	chr17	58238410	58242905	19	1496	1768	0.846154	1265.85	4	11
chr17	57855000	58625000	HEATR6	NM_022070.5	chr17	57859950	57872352	chr17	58154014	58161089	23	1496	1768	0.846154	1265.85	4	10
chr17	57855000	58625000	HEATR6	NM_022070.5	chr17	57874273	57875707	chr17	58154014	58161089	6	1496	1768	0.846154	1265.85	4	20
chr17	57855000	58625000	HEATR6	NM_022070.5	chr17	57877274	57882708	chr17	58154014	58161089	10	1496	1768	0.846154	1265.85	4	16
chr17	57855000	58625000	HEATR6	NM_022070.5	chr17	58154014	58161089	chr17	58231274	58234451	13	1496	1768	0.846154	1265.85	4	13
chr17	57855000	58625000	HEATR6	NM_022070.5	chr17	58154014	58161089	chr17	58462244	58463874	5	1496	1768	0.846154	1265.85	4	21
chr17	57855000	58625000	HEATR6	NM_022070.5	chr17	58154014	58161089	chr17	58493436	58494628	4	1496	1768	0.846154	1265.85	4	22
chr17	57855000	58625000	HEATR6	NM_022070.5	chr17	58154014	58161089	chr17	58244094	58246096	12	1496	1768	0.846154	1265.85	4	14
chr17	57855000	58625000	HEATR6	NM_022070.5	chr17	57852365	57856574	chr17	58154014	58161089	9	1496	1768	0.846154	1265.85	4	17
chr17	57855000	58625000	HEATR6	NM_022070.5	chr17	58154014	58161089	chr17	58391741	58394650	8	1496	1768	0.846154	1265.85	4	18
chr17	57855000	58625000	HEATR6	NM_022070.5	chr17	58154014	58161089	chr17	58422067	58424935	12	1496	1768	0.846154	1265.85	4	14
chr17	57855000	58625000	HEATR6	NM_022070.5	chr17	58154014	58161089	chr17	58429026	58436775	33	1496	1768	0.846154	1265.85	4	7
chr17	57855000	58625000	HEATR6	NM_022070.5	chr17	58154014	58161089	chr17	58447897	58451495	16	1496	1768	0.846154	1265.85	4	12
chr17	57855000	58625000	HEATR6	NM_022070.5	chr17	58154014	58161089	chr17	58459054	58460384	7	1496	1768	0.846154	1265.85	4	19
chr17	57855000	58625000	HEATR6	NM_022070.5	chr17	57884265	57887088	chr17	58154014	58161089	3	1496	1768	0.846154	1265.85	4	23
chr17	57855000	58625000	HEATR6	NM_022070.5	chr17	57888097	57890714	chr17	58154014	58161089	4	1496	1768	0.846154	1265.85	4	22
chr17	57855000	58625000	HEATR6	NM_022070.5	chr17	58154014	58161089	chr17	58247087	58249980	31	1496	1768	0.846154	1265.85	4	8
chr17	57855000	58625000	HEATR6	NM_022070.5	chr17	58154014	58161089	chr17	58251468	58253240	10	1496	1768	0.846154	1265.85	4	16
chr17	57855000	58625000	HEATR6	NM_022070.5	chr17	58154014	58161089	chr17	58274995	58276427	8	1496	1768	0.846154	1265.85	4	18
chr17	57855000	58625000	HEATR6	NM_022070.5	chr17	58154014	58161089	chr17	58307412	58309337	11	1496	1768	0.846154	1265.85	4	15
chr17	57855000	58625000	HEATR6	NM_022070.5	chr17	58154014	58161089	chr17	58381442	58383774	6	1496	1768	0.846154	1265.85	4	20
chr17	57855000	58625000	HEATR6	NM_022070.5	chr17	58154014	58161089	chr17	58557684	58559095	6	1496	1768	0.846154	1265.85	4	20
chr17	57855000	58625000	HEATR6	NM_022070.5	chr17	58154014	58161089	chr17	58164123	58167274	207	1496	1768	0.846154	1265.85	4	3
chr17	57855000	58625000	HEATR6	NM_022070.5	chr17	58154014	58161089	chr17	58167891	58171580	221	1496	1768	0.846154	1265.85	4	2
chr17	57855000	58625000	HEATR6	NM_022070.5	chr17	58154014	58161089	chr17	58179344	58180608	50	1496	1768	0.846154	1265.85	4	6
chr17	57855000	58625000	HEATR6	NM_022070.5	chr17	58154014	58161089	chr17	58184262	58186837	60	1496	1768	0.846154	1265.85	4	5
chr17	57855000	58625000	HEATR6	NM_022070.5	chr17	58154014	58161089	chr17	58216580	58217949	13	1496	1768	0.846154	1265.85	4	13
chr17	57855000	58625000	HEATR6	NM_022070.5	chr17	58154014	58161089	chr17	58218394	58221266	16	1496	1768	0.846154	1265.85	4	12
chr17	57855000	58625000	HEATR6	NM_022070.5	chr17	58154014	58161089	chr17	58519776	58522036	8	1496	1768	0.846154	1265.85	4	18
chr17	57855000	58625000	HEATR6	NM_022070.5	chr17	58154014	58161089	chr17	58497978	58499334	6	1496	1768	0.846154	1265.85	4	20
chr17	57855000	58625000	HEATR6	NM_022070.5	chr17	58154014	58161089	chr17	58507904	58509794	4	1496	1768	0.846154	1265.85	4	22
chr17	57855000	58625000	HEATR6	NM_022070.5	chr17	58154014	58161089	chr17	58512876	58514581	3	1496	1768	0.846154	1265.85	4	23
chr17	57855000	58625000	HEATR6	NM_022070.5	chr17	57975877	57977301	chr17	58154014	58161089	5	1496	1768	0.846154	1265.85	4	21
chr17	57855000	58625000	HEATR6	NM_022070.5	chr17	58154014	58161089	chr17	58546637	58548214	6	1496	1768	0.846154	1265.85	4	20
chr17	57855000	58625000	HEATR6	NM_022070.5	chr17	58113537	58117893	chr17	58154014	58161089	67	1496	1768	0.846154	1265.85	4	4
chr17	57855000	58625000	HEATR6	NM_022070.5	chr17	58154014	58161089	chr17	58211415	58213749	25	1496	1768	0.846154	1265.85	4	9
chr17	57855000	58625000	HEATR6	NM_022070.5	chr17	57991124	57992570	chr17	58154014	58161089	25	1496	1768	0.846154	1265.85	4	9
chr17	57855000	58625000	HEATR6	NM_022070.5	chr17	58007346	58009033	chr17	58154014	58161089	10	1496	1768	0.846154	1265.85	4	16
chr17	57855000	58625000	HEATR6	NM_022070.5	chr17	57898568	57951001	chr17	58154014	58161089	514	1496	1768	0.846154	1265.85	4	1
chr17	58695000	58705000	HEATR6	NM_022070.5	chr17	58154014	58161089	chr17	58704142	58706039	12	12	1768	0.00678733	0.081448	4	1
chr15	64090000	64155000	HERC1	NM_003922.4	chr15	64123781	64126832	chr15	64147192	64151955	9	9	9	1	9	1	1
chr1	1215000	1460000	HES4	NM_001142467.2	chr1	931306	938084	chr1	1235267	1236742	4	4	82	0.0487805	0.195122	11	1
chr1	1215000	1460000	HES4	NM_021170.4	chr1	931306	938084	chr1	1235267	1236742	4	4	82	0.0487805	0.195122	11	1
chr7	26215000	26225000	HNRNPA2B1	NM_002137.4	chr7	26215904	26221410	chr7	26236444	26245660	32	195	661	0.295008	57.5265	1	2
chr7	26215000	26225000	HNRNPA2B1	NM_002137.4	chr7	26222019	26229674	chr7	26236444	26245660	163	195	661	0.295008	57.5265	1	1
chr7	26215000	26225000	HNRNPA2B1	NM_031243.3	chr7	26215904	26221410	chr7	26236444	26245660	32	195	661	0.295008	57.5265	1	2
chr7	26215000	26225000	HNRNPA2B1	NM_031243.3	chr7	26222019	26229674	chr7	26236444	26245660	163	195	661	0.295008	57.5265	1	1
chr19	12960000	13275000	HOOK2	NM_001100176.2	chr19	12882221	12891568	chr19	12975158	12980310	8	36	251	0.143426	5.16335	11	1
chr19	12960000	13275000	HOOK2	NM_001100176.2	chr19	12882221	12891568	chr19	12982805	12986445	6	36	251	0.143426	5.16335	11	2
chr19	12960000	13275000	HOOK2	NM_001100176.2	chr19	12882221	12891568	chr19	13039070	13040386	4	36	251	0.143426	5.16335	11	4
chr19	12960000	13275000	HOOK2	NM_001100176.2	chr19	12882221	12891568	chr19	13074978	13079094	5	36	251	0.143426	5.16335	11	3
chr19	12960000	13275000	HOOK2	NM_001100176.2	chr19	12882221	12891568	chr19	13160643	13177345	5	36	251	0.143426	5.16335	11	3
chr19	12960000	13275000	HOOK2	NM_001100176.2	chr19	12882221	12891568	chr19	13270927	13276769	8	36	251	0.143426	5.16335	11	1
chr19	12960000	13275000	HOOK2	NM_013312.3	chr19	12882221	12891568	chr19	12975158	12980310	8	36	251	0.143426	5.16335	11	1
chr19	12960000	13275000	HOOK2	NM_013312.3	chr19	12882221	12891568	chr19	12982805	12986445	6	36	251	0.143426	5.16335	11	2
chr19	12960000	13275000	HOOK2	NM_013312.3	chr19	12882221	12891568	chr19	13039070	13040386	4	36	251	0.143426	5.16335	11	4
chr19	12960000	13275000	HOOK2	NM_013312.3	chr19	12882221	12891568	chr19	13074978	13079094	5	36	251	0.143426	5.16335	11	3
chr19	12960000	13275000	HOOK2	NM_013312.3	chr19	12882221	12891568	chr19	13160643	13177345	5	36	251	0.143426	5.16335	11	3
chr19	12960000	13275000	HOOK2	NM_013312.3	chr19	12882221	12891568	chr19	13270927	13276769	8	36	251	0.143426	5.16335	11	1
chr3	149055000	149290000	HPS3	NM_001308258.2	chr3	148845617	148848675	chr3	149083068	149089823	3	8	21	0.380952	3.04762	5	2
chr3	149055000	149290000	HPS3	NM_001308258.2	chr3	148845617	148848675	chr3	149101190	149107573	5	8	21	0.380952	3.04762	5	1
chr3	149055000	149290000	HPS3	NM_032383.5	chr3	148845617	148848675	chr3	149083068	149089823	3	8	21	0.380952	3.04762	5	2
chr3	149055000	149290000	HPS3	NM_032383.5	chr3	148845617	148848675	chr3	149101190	149107573	5	8	21	0.380952	3.04762	5	1
chr19	12960000	13275000	IER2	NM_004907.3	chr19	13073250	13074338	chr19	13256790	13269928	3	659	1176	0.560374	369.287	1	13
chr19	12960000	13275000	IER2	NM_004907.3	chr19	13074978	13079094	chr19	13256790	13269928	14	659	1176	0.560374	369.287	1	8
chr19	12960000	13275000	IER2	NM_004907.3	chr19	13088315	13090347	chr19	13256790	13269928	5	659	1176	0.560374	369.287	1	12
chr19	12960000	13275000	IER2	NM_004907.3	chr19	13091954	13098446	chr19	13256790	13269928	9	659	1176	0.560374	369.287	1	10
chr19	12960000	13275000	IER2	NM_004907.3	chr19	13142379	13151235	chr19	13256790	13269928	10	659	1176	0.560374	369.287	1	9
chr19	12960000	13275000	IER2	NM_004907.3	chr19	13154714	13159662	chr19	13256790	13269928	7	659	1176	0.560374	369.287	1	11
chr19	12960000	13275000	IER2	NM_004907.3	chr19	13160643	13177345	chr19	13256790	13269928	18	659	1176	0.560374	369.287	1	6
chr19	12960000	13275000	IER2	NM_004907.3	chr19	13181295	13191176	chr19	13256790	13269928	9	659	1176	0.560374	369.287	1	10
chr19	12960000	13275000	IER2	NM_004907.3	chr19	13217538	13219024	chr19	13256790	13269928	10	659	1176	0.560374	369.287	1	9
chr19	12960000	13275000	IER2	NM_004907.3	chr19	13219661	13221960	chr19	13256790	13269928	27	659	1176	0.560374	369.287	1	3
chr19	12960000	13275000	IER2	NM_004907.3	chr19	13238866	13240993	chr19	13256790	13269928	16	659	1176	0.560374	369.287	1	7
chr19	12960000	13275000	IER2	NM_004907.3	chr19	13242912	13244011	chr19	13256790	13269928	25	659	1176	0.560374	369.287	1	4
chr19	12960000	13275000	IER2	NM_004907.3	chr19	13244972	13246260	chr19	13256790	13269928	19	659	1176	0.560374	369.287	1	5
chr19	12960000	13275000	IER2	NM_004907.3	chr19	13253568	13255662	chr19	13256790	13269928	53	659	1176	0.560374	369.287	1	2
chr19	12960000	13275000	IER2	NM_004907.3	chr19	13256790	13269928	chr19	13270927	13276769	434	659	1176	0.560374	369.287	1	1
chr17	37435000	38350000	IGFBP4	NM_001552.3	chr17	38343925	38352420	chr17	38598473	38611601	3	3	762	0.00393701	0.011811	12	1
chr10	5580000	5615000	IL15RA	NM_001243539.2	chr10	5585923	5594543	chr10	6017656	6020634	3	3	26	0.115385	0.346154	12	1
chr10	5580000	5615000	IL15RA	NM_001256765.1	chr10	5585923	5594543	chr10	6017656	6020634	3	3	26	0.115385	0.346154	12	1
chr10	5580000	5615000	IL15RA	NM_001351097.2	chr10	5585923	5594543	chr10	6017656	6020634	3	3	26	0.115385	0.346154	12	1
chr10	5580000	5615000	IL15RA	NM_002189.4	chr10	5585923	5594543	chr10	6017656	6020634	3	3	26	0.115385	0.346154	12	1
chr10	5580000	5615000	IL15RA	NM_172200.3	chr10	5585923	5594543	chr10	6017656	6020634	3	3	26	0.115385	0.346154	12	1
chr14	105160000	105210000	INF2	NM_001031714.4	chr14	105152930	105162077	chr14	105163031	105165084	14	40	184	0.217391	8.69565	1	2
chr14	105160000	105210000	INF2	NM_001031714.4	chr14	105152930	105162077	chr14	105171704	105175927	26	40	184	0.217391	8.69565	1	1
chr14	105160000	105210000	INF2	NM_022489.4	chr14	105152930	105162077	chr14	105163031	105165084	14	40	184	0.217391	8.69565	1	2
chr14	105160000	105210000	INF2	NM_022489.4	chr14	105152930	105162077	chr14	105171704	105175927	26	40	184	0.217391	8.69565	1	1
chr14	105160000	105210000	INF2	NM_032714.3	chr14	105152930	105162077	chr14	105171704	105175927	26	40	184	0.217391	8.69565	1	1
chr14	105160000	105210000	INF2	NM_032714.3	chr14	105152930	105162077	chr14	105163031	105165084	14	40	184	0.217391	8.69565	1	2
chr14	105280000	105300000	INF2	NM_001031714.4	chr14	105152930	105162077	chr14	105285460	105288208	6	6	184	0.0326087	0.195652	7	1
chr14	105280000	105300000	INF2	NM_022489.4	chr14	105152930	105162077	chr14	105285460	105288208	6	6	184	0.0326087	0.195652	7	1
chr14	105280000	105300000	INF2	NM_032714.3	chr14	105152930	105162077	chr14	105285460	105288208	6	6	184	0.0326087	0.195652	7	1
chr1	1215000	1460000	INTS11	NM_001256456.2	chr1	1253011	1254726	chr1	1259028	1261427	20	33	33	1	33	3	1
chr1	1215000	1460000	INTS11	NM_001256456.2	chr1	1249198	1252080	chr1	1259028	1261427	13	33	33	1	33	3	2
chr1	1215000	1460000	INTS11	NM_001256460.2	chr1	1253011	1254726	chr1	1259028	1261427	20	33	33	1	33	3	1
chr1	1215000	1460000	INTS11	NM_001256460.2	chr1	1249198	1252080	chr1	1259028	1261427	13	33	33	1	33	3	2
chr1	1215000	1460000	INTS11	NM_001256462.2	chr1	1249198	1252080	chr1	1259028	1261427	13	33	33	1	33	3	2
chr1	1215000	1460000	INTS11	NM_001256462.2	chr1	1253011	1254726	chr1	1259028	1261427	20	33	33	1	33	3	1
chr1	1215000	1460000	INTS11	NM_001256463.2	chr1	1249198	1252080	chr1	1259028	1261427	13	33	33	1	33	3	2
chr1	1215000	1460000	INTS11	NM_001256463.2	chr1	1253011	1254726	chr1	1259028	1261427	20	33	33	1	33	3	1
chr1	1215000	1460000	INTS11	NM_017871.6	chr1	1249198	1252080	chr1	1259028	1261427	13	33	33	1	33	3	2
chr1	1215000	1460000	INTS11	NM_017871.6	chr1	1253011	1254726	chr1	1259028	1261427	20	33	33	1	33	3	1
chr17	57855000	58625000	INTS2	NM_001330417.2	chr17	58429026	58436775	chr17	60003911	60005943	3	3	60	0.05	0.15	35	1
chr17	57855000	58625000	INTS2	NM_001351695.2	chr17	58429026	58436775	chr17	60003911	60005943	3	3	60	0.05	0.15	35	1
chr17	57855000	58625000	INTS2	NM_020748.4	chr17	58429026	58436775	chr17	60003911	60005943	3	3	60	0.05	0.15	35	1
chr11	77890000	77960000	INTS4	NM_033547.4	chr11	77700309	77716842	chr11	77922993	77932038	3	8	271	0.0295203	0.236162	4	2
chr11	77890000	77960000	INTS4	NM_033547.4	chr11	77700309	77716842	chr11	77933027	77945093	5	8	271	0.0295203	0.236162	4	1
chr11	77975000	78025000	INTS4	NM_033547.4	chr11	77700309	77716842	chr11	78014974	78017614	3	3	271	0.0110701	0.0332103	4	1
chr1	234650000	234790000	IRF2BP2	NM_001077397.1	chr1	234651030	234652420	chr1	234733217	234750667	10	646	2545	0.253831	163.975	1	13
chr1	234650000	234790000	IRF2BP2	NM_001077397.1	chr1	234656688	234660004	chr1	234733217	234750667	45	646	2545	0.253831	163.975	1	6
chr1	234650000	234790000	IRF2BP2	NM_001077397.1	chr1	234685688	234687125	chr1	234733217	234750667	7	646	2545	0.253831	163.975	1	14
chr1	234650000	234790000	IRF2BP2	NM_001077397.1	chr1	234688499	234691759	chr1	234733217	234750667	22	646	2545	0.253831	163.975	1	10
chr1	234650000	234790000	IRF2BP2	NM_001077397.1	chr1	234664999	234672711	chr1	234733217	234750667	22	646	2545	0.253831	163.975	1	10
chr1	234650000	234790000	IRF2BP2	NM_001077397.1	chr1	234673583	234681578	chr1	234733217	234750667	86	646	2545	0.253831	163.975	1	2
chr1	234650000	234790000	IRF2BP2	NM_001077397.1	chr1	234708399	234710223	chr1	234733217	234750667	13	646	2545	0.253831	163.975	1	12
chr1	234650000	234790000	IRF2BP2	NM_001077397.1	chr1	234724501	234726245	chr1	234733217	234750667	26	646	2545	0.253831	163.975	1	8
chr1	234650000	234790000	IRF2BP2	NM_001077397.1	chr1	234694707	234696317	chr1	234733217	234750667	16	646	2545	0.253831	163.975	1	11
chr1	234650000	234790000	IRF2BP2	NM_001077397.1	chr1	234697800	234702532	chr1	234733217	234750667	51	646	2545	0.253831	163.975	1	5
chr1	234650000	234790000	IRF2BP2	NM_001077397.1	chr1	234733217	234750667	chr1	234759362	234761179	53	646	2545	0.253831	163.975	1	4
chr1	234650000	234790000	IRF2BP2	NM_001077397.1	chr1	234733217	234750667	chr1	234762617	234764598	53	646	2545	0.253831	163.975	1	4
chr1	234650000	234790000	IRF2BP2	NM_001077397.1	chr1	234733217	234750667	chr1	234768320	234770524	16	646	2545	0.253831	163.975	1	11
chr1	234650000	234790000	IRF2BP2	NM_001077397.1	chr1	234733217	234750667	chr1	234773894	234775679	25	646	2545	0.253831	163.975	1	9
chr1	234650000	234790000	IRF2BP2	NM_001077397.1	chr1	234733217	234750667	chr1	234783021	234784283	10	646	2545	0.253831	163.975	1	13
chr1	234650000	234790000	IRF2BP2	NM_001077397.1	chr1	234733217	234750667	chr1	234788676	234798375	108	646	2545	0.253831	163.975	1	1
chr1	234650000	234790000	IRF2BP2	NM_001077397.1	chr1	234733217	234750667	chr1	234751639	234755720	54	646	2545	0.253831	163.975	1	3
chr1	234650000	234790000	IRF2BP2	NM_001077397.1	chr1	234733217	234750667	chr1	234756850	234758773	29	646	2545	0.253831	163.975	1	7
chr1	234650000	234790000	IRF2BP2	NM_182972.3	chr1	234685688	234687125	chr1	234733217	234750667	7	646	2545	0.253831	163.975	1	14
chr1	234650000	234790000	IRF2BP2	NM_182972.3	chr1	234733217	234750667	chr1	234783021	234784283	10	646	2545	0.253831	163.975	1	13
chr1	234650000	234790000	IRF2BP2	NM_182972.3	chr1	234697800	234702532	chr1	234733217	234750667	51	646	2545	0.253831	163.975	1	5
chr1	234650000	234790000	IRF2BP2	NM_182972.3	chr1	234733217	234750667	chr1	234788676	234798375	108	646	2545	0.253831	163.975	1	1
chr1	234650000	234790000	IRF2BP2	NM_182972.3	chr1	234733217	234750667	chr1	234768320	234770524	16	646	2545	0.253831	163.975	1	11
chr1	234650000	234790000	IRF2BP2	NM_182972.3	chr1	234733217	234750667	chr1	234773894	234775679	25	646	2545	0.253831	163.975	1	9
chr1	234650000	234790000	IRF2BP2	NM_182972.3	chr1	234733217	234750667	chr1	234756850	234758773	29	646	2545	0.253831	163.975	1	7
chr1	234650000	234790000	IRF2BP2	NM_182972.3	chr1	234733217	234750667	chr1	234759362	234761179	53	646	2545	0.253831	163.975	1	4
chr1	234650000	234790000	IRF2BP2	NM_182972.3	chr1	234733217	234750667	chr1	234762617	234764598	53	646	2545	0.253831	163.975	1	4
chr1	234650000	234790000	IRF2BP2	NM_182972.3	chr1	234651030	234652420	chr1	234733217	234750667	10	646	2545	0.253831	163.975	1	13
chr1	234650000	234790000	IRF2BP2	NM_182972.3	chr1	234656688	234660004	chr1	234733217	234750667	45	646	2545	0.253831	163.975	1	6
chr1	234650000	234790000	IRF2BP2	NM_182972.3	chr1	234664999	234672711	chr1	234733217	234750667	22	646	2545	0.253831	163.975	1	10
chr1	234650000	234790000	IRF2BP2	NM_182972.3	chr1	234673583	234681578	chr1	234733217	234750667	86	646	2545	0.253831	163.975	1	2
chr1	234650000	234790000	IRF2BP2	NM_182972.3	chr1	234688499	234691759	chr1	234733217	234750667	22	646	2545	0.253831	163.975	1	10
chr1	234650000	234790000	IRF2BP2	NM_182972.3	chr1	234694707	234696317	chr1	234733217	234750667	16	646	2545	0.253831	163.975	1	11
chr1	234650000	234790000	IRF2BP2	NM_182972.3	chr1	234708399	234710223	chr1	234733217	234750667	13	646	2545	0.253831	163.975	1	12
chr1	234650000	234790000	IRF2BP2	NM_182972.3	chr1	234724501	234726245	chr1	234733217	234750667	26	646	2545	0.253831	163.975	1	8
chr1	234650000	234790000	IRF2BP2	NM_182972.3	chr1	234733217	234750667	chr1	234751639	234755720	54	646	2545	0.253831	163.975	1	3
chr1	234815000	234835000	IRF2BP2	NM_001077397.1	chr1	234733217	234750667	chr1	234818407	234821298	29	53	2545	0.0208251	1.10373	1	1
chr1	234815000	234835000	IRF2BP2	NM_001077397.1	chr1	234733217	234750667	chr1	234828273	234829389	14	53	2545	0.0208251	1.10373	1	2
chr1	234815000	234835000	IRF2BP2	NM_001077397.1	chr1	234733217	234750667	chr1	234834957	234837007	10	53	2545	0.0208251	1.10373	1	3
chr1	234815000	234835000	IRF2BP2	NM_182972.3	chr1	234733217	234750667	chr1	234818407	234821298	29	53	2545	0.0208251	1.10373	1	1
chr1	234815000	234835000	IRF2BP2	NM_182972.3	chr1	234733217	234750667	chr1	234828273	234829389	14	53	2545	0.0208251	1.10373	1	2
chr1	234815000	234835000	IRF2BP2	NM_182972.3	chr1	234733217	234750667	chr1	234834957	234837007	10	53	2545	0.0208251	1.10373	1	3
chr1	234990000	235055000	IRF2BP2	NM_001077397.1	chr1	234733217	234750667	chr1	235009756	235012939	150	291	2545	0.114342	33.2735	1	1
chr1	234990000	235055000	IRF2BP2	NM_001077397.1	chr1	234733217	234750667	chr1	235028725	235030888	14	291	2545	0.114342	33.2735	1	5
chr1	234990000	235055000	IRF2BP2	NM_001077397.1	chr1	234733217	234750667	chr1	235047096	235048376	6	291	2545	0.114342	33.2735	1	9
chr1	234990000	235055000	IRF2BP2	NM_001077397.1	chr1	234733217	234750667	chr1	235051270	235055789	9	291	2545	0.114342	33.2735	1	6
chr1	234990000	235055000	IRF2BP2	NM_001077397.1	chr1	234733217	234750667	chr1	234996643	235000179	23	291	2545	0.114342	33.2735	1	3
chr1	234990000	235055000	IRF2BP2	NM_001077397.1	chr1	234733217	234750667	chr1	235001793	235003762	17	291	2545	0.114342	33.2735	1	4
chr1	234990000	235055000	IRF2BP2	NM_001077397.1	chr1	234733217	234750667	chr1	235004472	235007849	29	291	2545	0.114342	33.2735	1	2
chr1	234990000	235055000	IRF2BP2	NM_001077397.1	chr1	234733217	234750667	chr1	235031566	235032621	7	291	2545	0.114342	33.2735	1	8
chr1	234990000	235055000	IRF2BP2	NM_001077397.1	chr1	234733217	234750667	chr1	235022366	235023645	7	291	2545	0.114342	33.2735	1	8
chr1	234990000	235055000	IRF2BP2	NM_001077397.1	chr1	234733217	234750667	chr1	235026488	235028227	8	291	2545	0.114342	33.2735	1	7
chr1	234990000	235055000	IRF2BP2	NM_001077397.1	chr1	234733217	234750667	chr1	235034343	235035852	14	291	2545	0.114342	33.2735	1	5
chr1	234990000	235055000	IRF2BP2	NM_001077397.1	chr1	234733217	234750667	chr1	235038208	235039667	7	291	2545	0.114342	33.2735	1	8
chr1	234990000	235055000	IRF2BP2	NM_182972.3	chr1	234733217	234750667	chr1	235031566	235032621	7	291	2545	0.114342	33.2735	1	8
chr1	234990000	235055000	IRF2BP2	NM_182972.3	chr1	234733217	234750667	chr1	235026488	235028227	8	291	2545	0.114342	33.2735	1	7
chr1	234990000	235055000	IRF2BP2	NM_182972.3	chr1	234733217	234750667	chr1	235028725	235030888	14	291	2545	0.114342	33.2735	1	5
chr1	234990000	235055000	IRF2BP2	NM_182972.3	chr1	234733217	234750667	chr1	235034343	235035852	14	291	2545	0.114342	33.2735	1	5
chr1	234990000	235055000	IRF2BP2	NM_182972.3	chr1	234733217	234750667	chr1	235038208	235039667	7	291	2545	0.114342	33.2735	1	8
chr1	234990000	235055000	IRF2BP2	NM_182972.3	chr1	234733217	234750667	chr1	235047096	235048376	6	291	2545	0.114342	33.2735	1	9
chr1	234990000	235055000	IRF2BP2	NM_182972.3	chr1	234733217	234750667	chr1	235051270	235055789	9	291	2545	0.114342	33.2735	1	6
chr1	234990000	235055000	IRF2BP2	NM_182972.3	chr1	234733217	234750667	chr1	234996643	235000179	23	291	2545	0.114342	33.2735	1	3
chr1	234990000	235055000	IRF2BP2	NM_182972.3	chr1	234733217	234750667	chr1	235001793	235003762	17	291	2545	0.114342	33.2735	1	4
chr1	234990000	235055000	IRF2BP2	NM_182972.3	chr1	234733217	234750667	chr1	235004472	235007849	29	291	2545	0.114342	33.2735	1	2
chr1	234990000	235055000	IRF2BP2	NM_182972.3	chr1	234733217	234750667	chr1	235009756	235012939	150	291	2545	0.114342	33.2735	1	1
chr1	234990000	235055000	IRF2BP2	NM_182972.3	chr1	234733217	234750667	chr1	235022366	235023645	7	291	2545	0.114342	33.2735	1	8
chr1	235120000	235300000	IRF2BP2	NM_001077397.1	chr1	234733217	234750667	chr1	235246015	235247839	71	355	2545	0.139489	49.5187	1	1
chr1	235120000	235300000	IRF2BP2	NM_001077397.1	chr1	234733217	234750667	chr1	235252464	235254734	28	355	2545	0.139489	49.5187	1	6
chr1	235120000	235300000	IRF2BP2	NM_001077397.1	chr1	234733217	234750667	chr1	235256030	235257814	27	355	2545	0.139489	49.5187	1	7
chr1	235120000	235300000	IRF2BP2	NM_001077397.1	chr1	234733217	234750667	chr1	235264655	235269604	31	355	2545	0.139489	49.5187	1	5
chr1	235120000	235300000	IRF2BP2	NM_001077397.1	chr1	234733217	234750667	chr1	235242400	235243894	33	355	2545	0.139489	49.5187	1	4
chr1	235120000	235300000	IRF2BP2	NM_001077397.1	chr1	234733217	234750667	chr1	235130978	235135358	51	355	2545	0.139489	49.5187	1	2
chr1	235120000	235300000	IRF2BP2	NM_001077397.1	chr1	234733217	234750667	chr1	235169926	235171433	4	355	2545	0.139489	49.5187	1	13
chr1	235120000	235300000	IRF2BP2	NM_001077397.1	chr1	234733217	234750667	chr1	235165137	235166989	3	355	2545	0.139489	49.5187	1	14
chr1	235120000	235300000	IRF2BP2	NM_001077397.1	chr1	234733217	234750667	chr1	235180347	235181576	13	355	2545	0.139489	49.5187	1	9
chr1	235120000	235300000	IRF2BP2	NM_001077397.1	chr1	234733217	234750667	chr1	235119376	235120891	18	355	2545	0.139489	49.5187	1	8
chr1	235120000	235300000	IRF2BP2	NM_001077397.1	chr1	234733217	234750667	chr1	235122068	235127606	48	355	2545	0.139489	49.5187	1	3
chr1	235120000	235300000	IRF2BP2	NM_001077397.1	chr1	234733217	234750667	chr1	235142188	235144924	8	355	2545	0.139489	49.5187	1	12
chr1	235120000	235300000	IRF2BP2	NM_001077397.1	chr1	234733217	234750667	chr1	235146566	235148776	11	355	2545	0.139489	49.5187	1	10
chr1	235120000	235300000	IRF2BP2	NM_001077397.1	chr1	234733217	234750667	chr1	235153402	235154589	9	355	2545	0.139489	49.5187	1	11
chr1	235120000	235300000	IRF2BP2	NM_182972.3	chr1	234733217	234750667	chr1	235242400	235243894	33	355	2545	0.139489	49.5187	1	4
chr1	235120000	235300000	IRF2BP2	NM_182972.3	chr1	234733217	234750667	chr1	235246015	235247839	71	355	2545	0.139489	49.5187	1	1
chr1	235120000	235300000	IRF2BP2	NM_182972.3	chr1	234733217	234750667	chr1	235252464	235254734	28	355	2545	0.139489	49.5187	1	6
chr1	235120000	235300000	IRF2BP2	NM_182972.3	chr1	234733217	234750667	chr1	235256030	235257814	27	355	2545	0.139489	49.5187	1	7
chr1	235120000	235300000	IRF2BP2	NM_182972.3	chr1	234733217	234750667	chr1	235122068	235127606	48	355	2545	0.139489	49.5187	1	3
chr1	235120000	235300000	IRF2BP2	NM_182972.3	chr1	234733217	234750667	chr1	235169926	235171433	4	355	2545	0.139489	49.5187	1	13
chr1	235120000	235300000	IRF2BP2	NM_182972.3	chr1	234733217	234750667	chr1	235180347	235181576	13	355	2545	0.139489	49.5187	1	9
chr1	235120000	235300000	IRF2BP2	NM_182972.3	chr1	234733217	234750667	chr1	235264655	235269604	31	355	2545	0.139489	49.5187	1	5
chr1	235120000	235300000	IRF2BP2	NM_182972.3	chr1	234733217	234750667	chr1	235119376	235120891	18	355	2545	0.139489	49.5187	1	8
chr1	235120000	235300000	IRF2BP2	NM_182972.3	chr1	234733217	234750667	chr1	235153402	235154589	9	355	2545	0.139489	49.5187	1	11
chr1	235120000	235300000	IRF2BP2	NM_182972.3	chr1	234733217	234750667	chr1	235130978	235135358	51	355	2545	0.139489	49.5187	1	2
chr1	235120000	235300000	IRF2BP2	NM_182972.3	chr1	234733217	234750667	chr1	235142188	235144924	8	355	2545	0.139489	49.5187	1	12
chr1	235120000	235300000	IRF2BP2	NM_182972.3	chr1	234733217	234750667	chr1	235146566	235148776	11	355	2545	0.139489	49.5187	1	10
chr1	235120000	235300000	IRF2BP2	NM_182972.3	chr1	234733217	234750667	chr1	235165137	235166989	3	355	2545	0.139489	49.5187	1	14
chr19	12960000	13275000	JUNB	NM_002229.3	chr19	12892067	12908921	chr19	12975158	12980310	38	213	843	0.252669	53.8185	5	2
chr19	12960000	13275000	JUNB	NM_002229.3	chr19	12892067	12908921	chr19	12980787	12982198	8	213	843	0.252669	53.8185	5	7
chr19	12960000	13275000	JUNB	NM_002229.3	chr19	12892067	12908921	chr19	12982805	12986445	13	213	843	0.252669	53.8185	5	5
chr19	12960000	13275000	JUNB	NM_002229.3	chr19	12892067	12908921	chr19	13003938	13005229	8	213	843	0.252669	53.8185	5	7
chr19	12960000	13275000	JUNB	NM_002229.3	chr19	12892067	12908921	chr19	13034663	13035985	8	213	843	0.252669	53.8185	5	7
chr19	12960000	13275000	JUNB	NM_002229.3	chr19	12892067	12908921	chr19	13073250	13074338	5	213	843	0.252669	53.8185	5	9
chr19	12960000	13275000	JUNB	NM_002229.3	chr19	12892067	12908921	chr19	13074978	13079094	16	213	843	0.252669	53.8185	5	4
chr19	12960000	13275000	JUNB	NM_002229.3	chr19	12892067	12908921	chr19	13088315	13090347	3	213	843	0.252669	53.8185	5	11
chr19	12960000	13275000	JUNB	NM_002229.3	chr19	12892067	12908921	chr19	13091954	13098446	8	213	843	0.252669	53.8185	5	7
chr19	12960000	13275000	JUNB	NM_002229.3	chr19	12892067	12908921	chr19	13142379	13151235	8	213	843	0.252669	53.8185	5	7
chr19	12960000	13275000	JUNB	NM_002229.3	chr19	12892067	12908921	chr19	13154714	13159662	9	213	843	0.252669	53.8185	5	6
chr19	12960000	13275000	JUNB	NM_002229.3	chr19	12892067	12908921	chr19	13160643	13177345	21	213	843	0.252669	53.8185	5	3
chr19	12960000	13275000	JUNB	NM_002229.3	chr19	12892067	12908921	chr19	13181295	13191176	8	213	843	0.252669	53.8185	5	7
chr19	12960000	13275000	JUNB	NM_002229.3	chr19	12892067	12908921	chr19	13217538	13219024	5	213	843	0.252669	53.8185	5	9
chr19	12960000	13275000	JUNB	NM_002229.3	chr19	12892067	12908921	chr19	13238866	13240993	5	213	843	0.252669	53.8185	5	9
chr19	12960000	13275000	JUNB	NM_002229.3	chr19	12892067	12908921	chr19	13242912	13244011	6	213	843	0.252669	53.8185	5	8
chr19	12960000	13275000	JUNB	NM_002229.3	chr19	12892067	12908921	chr19	13244972	13246260	4	213	843	0.252669	53.8185	5	10
chr19	12960000	13275000	JUNB	NM_002229.3	chr19	12892067	12908921	chr19	13270927	13276769	40	213	843	0.252669	53.8185	5	1
chr11	65270000	65290000	KAT5	NM_001206833.2	chr11	65263078	65280458	chr11	65477855	65480865	14	14	154	0.0909091	1.27273	21	1
chr11	65270000	65290000	KAT5	NM_006388.4	chr11	65263078	65280458	chr11	65477855	65480865	14	14	154	0.0909091	1.27273	21	1
chr11	65270000	65290000	KAT5	NM_182709.3	chr11	65263078	65280458	chr11	65477855	65480865	14	14	154	0.0909091	1.27273	21	1
chr11	65270000	65290000	KAT5	NM_182710.3	chr11	65263078	65280458	chr11	65477855	65480865	14	14	154	0.0909091	1.27273	21	1
chr2	85770000	85865000	KCMF1	NM_020122.5	chr2	85196624	85201013	chr2	85772489	85780109	6	6	168	0.0357143	0.214286	14	1
chr1	155900000	155970000	KHDC4	NM_014949.4	chr1	155903009	155905539	chr1	155930170	155933104	13	34	103	0.330097	11.2233	2	1
chr1	155900000	155970000	KHDC4	NM_014949.4	chr1	155903009	155905539	chr1	155939807	155941614	13	34	103	0.330097	11.2233	2	1
chr1	155900000	155970000	KHDC4	NM_014949.4	chr1	155903009	155905539	chr1	155960300	155961977	8	34	103	0.330097	11.2233	2	2
chr17	27135000	27160000	KIAA0100	NM_001321560.2	chr17	26971034	26974677	chr17	27134466	27137245	5	5	156	0.0320513	0.160256	4	1
chr17	27135000	27160000	KIAA0100	NM_001321561.2	chr17	26971034	26974677	chr17	27134466	27137245	5	5	156	0.0320513	0.160256	4	1
chr17	27135000	27160000	KIAA0100	NM_001363826.1	chr17	26971034	26974677	chr17	27134466	27137245	5	5	156	0.0320513	0.160256	4	1
chr17	27135000	27160000	KIAA0100	NM_001363827.1	chr17	26971034	26974677	chr17	27134466	27137245	5	5	156	0.0320513	0.160256	4	1
chr17	27135000	27160000	KIAA0100	NM_001363828.1	chr17	26971034	26974677	chr17	27134466	27137245	5	5	156	0.0320513	0.160256	4	1
chr17	27135000	27160000	KIAA0100	NM_001363829.1	chr17	26971034	26974677	chr17	27134466	27137245	5	5	156	0.0320513	0.160256	4	1
chr17	27135000	27160000	KIAA0100	NM_014680.5	chr17	26971034	26974677	chr17	27134466	27137245	5	5	156	0.0320513	0.160256	4	1
chr17	27430000	27540000	KIAA0100	NM_001321560.2	chr17	26971034	26974677	chr17	27441580	27456150	5	12	156	0.0769231	0.923077	8	1
chr17	27430000	27540000	KIAA0100	NM_001321560.2	chr17	26971034	26974677	chr17	27470591	27488148	4	12	156	0.0769231	0.923077	8	2
chr17	27430000	27540000	KIAA0100	NM_001321560.2	chr17	26971034	26974677	chr17	27494674	27496130	3	12	156	0.0769231	0.923077	8	3
chr17	27430000	27540000	KIAA0100	NM_001321561.2	chr17	26971034	26974677	chr17	27441580	27456150	5	12	156	0.0769231	0.923077	8	1
chr17	27430000	27540000	KIAA0100	NM_001321561.2	chr17	26971034	26974677	chr17	27470591	27488148	4	12	156	0.0769231	0.923077	8	2
chr17	27430000	27540000	KIAA0100	NM_001321561.2	chr17	26971034	26974677	chr17	27494674	27496130	3	12	156	0.0769231	0.923077	8	3
chr17	27430000	27540000	KIAA0100	NM_001363826.1	chr17	26971034	26974677	chr17	27441580	27456150	5	12	156	0.0769231	0.923077	8	1
chr17	27430000	27540000	KIAA0100	NM_001363826.1	chr17	26971034	26974677	chr17	27470591	27488148	4	12	156	0.0769231	0.923077	8	2
chr17	27430000	27540000	KIAA0100	NM_001363826.1	chr17	26971034	26974677	chr17	27494674	27496130	3	12	156	0.0769231	0.923077	8	3
chr17	27430000	27540000	KIAA0100	NM_001363827.1	chr17	26971034	26974677	chr17	27494674	27496130	3	12	156	0.0769231	0.923077	8	3
chr17	27430000	27540000	KIAA0100	NM_001363827.1	chr17	26971034	26974677	chr17	27441580	27456150	5	12	156	0.0769231	0.923077	8	1
chr17	27430000	27540000	KIAA0100	NM_001363827.1	chr17	26971034	26974677	chr17	27470591	27488148	4	12	156	0.0769231	0.923077	8	2
chr17	27430000	27540000	KIAA0100	NM_001363828.1	chr17	26971034	26974677	chr17	27441580	27456150	5	12	156	0.0769231	0.923077	8	1
chr17	27430000	27540000	KIAA0100	NM_001363828.1	chr17	26971034	26974677	chr17	27470591	27488148	4	12	156	0.0769231	0.923077	8	2
chr17	27430000	27540000	KIAA0100	NM_001363828.1	chr17	26971034	26974677	chr17	27494674	27496130	3	12	156	0.0769231	0.923077	8	3
chr17	27430000	27540000	KIAA0100	NM_001363829.1	chr17	26971034	26974677	chr17	27441580	27456150	5	12	156	0.0769231	0.923077	8	1
chr17	27430000	27540000	KIAA0100	NM_001363829.1	chr17	26971034	26974677	chr17	27470591	27488148	4	12	156	0.0769231	0.923077	8	2
chr17	27430000	27540000	KIAA0100	NM_001363829.1	chr17	26971034	26974677	chr17	27494674	27496130	3	12	156	0.0769231	0.923077	8	3
chr17	27430000	27540000	KIAA0100	NM_014680.5	chr17	26971034	26974677	chr17	27494674	27496130	3	12	156	0.0769231	0.923077	8	3
chr17	27430000	27540000	KIAA0100	NM_014680.5	chr17	26971034	26974677	chr17	27470591	27488148	4	12	156	0.0769231	0.923077	8	2
chr17	27430000	27540000	KIAA0100	NM_014680.5	chr17	26971034	26974677	chr17	27441580	27456150	5	12	156	0.0769231	0.923077	8	1
chr10	9050000	9230000	KIN	NM_012311.4	chr10	7828683	7831717	chr10	9107152	9112395	4	25	96	0.260417	6.51042	2	3
chr10	9050000	9230000	KIN	NM_012311.4	chr10	7828683	7831717	chr10	9150447	9155106	6	25	96	0.260417	6.51042	2	2
chr10	9050000	9230000	KIN	NM_012311.4	chr10	7828683	7831717	chr10	9227901	9231137	15	25	96	0.260417	6.51042	2	1
chr11	65270000	65290000	KLC2	NM_001134774.2	chr11	65263078	65280458	chr11	66023836	66026485	5	5	104	0.0480769	0.240385	42	1
chr11	65270000	65290000	KLC2	NM_001134775.2	chr11	65263078	65280458	chr11	66023836	66026485	5	5	104	0.0480769	0.240385	42	1
chr11	65270000	65290000	KLC2	NM_001134776.2	chr11	65263078	65280458	chr11	66023836	66026485	5	5	104	0.0480769	0.240385	42	1
chr11	65270000	65290000	KLC2	NM_001318734.2	chr11	65263078	65280458	chr11	66023836	66026485	5	5	104	0.0480769	0.240385	42	1
chr11	65270000	65290000	KLC2	NM_022822.3	chr11	65263078	65280458	chr11	66023836	66026485	5	5	104	0.0480769	0.240385	42	1
chr19	12960000	13275000	KLF1	NM_006563.5	chr19	12975158	12980310	chr19	12988866	13002942	30	117	179	0.653631	76.4749	4	1
chr19	12960000	13275000	KLF1	NM_006563.5	chr19	12980787	12982198	chr19	12988866	13002942	14	117	179	0.653631	76.4749	4	4
chr19	12960000	13275000	KLF1	NM_006563.5	chr19	12982805	12986445	chr19	12988866	13002942	22	117	179	0.653631	76.4749	4	2
chr19	12960000	13275000	KLF1	NM_006563.5	chr19	12988866	13002942	chr19	13039070	13040386	8	117	179	0.653631	76.4749	4	6
chr19	12960000	13275000	KLF1	NM_006563.5	chr19	12988866	13002942	chr19	13074978	13079094	15	117	179	0.653631	76.4749	4	3
chr19	12960000	13275000	KLF1	NM_006563.5	chr19	12988866	13002942	chr19	13091954	13098446	6	117	179	0.653631	76.4749	4	7
chr19	12960000	13275000	KLF1	NM_006563.5	chr19	12988866	13002942	chr19	13142379	13151235	5	117	179	0.653631	76.4749	4	8
chr19	12960000	13275000	KLF1	NM_006563.5	chr19	12988866	13002942	chr19	13219661	13221960	3	117	179	0.653631	76.4749	4	10
chr19	12960000	13275000	KLF1	NM_006563.5	chr19	12988866	13002942	chr19	13244972	13246260	4	117	179	0.653631	76.4749	4	9
chr19	12960000	13275000	KLF1	NM_006563.5	chr19	12988866	13002942	chr19	13270927	13276769	10	117	179	0.653631	76.4749	4	5
chr8	102385000	102450000	KLF10	NM_001032282.4	chr8	102386519	102389718	chr8	103657296	103671205	4	16	1032	0.0155039	0.248062	5	2
chr8	102385000	102450000	KLF10	NM_001032282.4	chr8	102397422	102402058	chr8	103657296	103671205	3	16	1032	0.0155039	0.248062	5	3
chr8	102385000	102450000	KLF10	NM_001032282.4	chr8	102446390	102451850	chr8	103657296	103671205	9	16	1032	0.0155039	0.248062	5	1
chr8	102385000	102450000	KLF10	NM_005655.4	chr8	102386519	102389718	chr8	103657296	103671205	4	16	1032	0.0155039	0.248062	5	2
chr8	102385000	102450000	KLF10	NM_005655.4	chr8	102397422	102402058	chr8	103657296	103671205	3	16	1032	0.0155039	0.248062	5	3
chr8	102385000	102450000	KLF10	NM_005655.4	chr8	102446390	102451850	chr8	103657296	103671205	9	16	1032	0.0155039	0.248062	5	1
chr10	5580000	5615000	KLF6	NM_001160124.2	chr10	3815780	3829435	chr10	5585923	5594543	8	8	657	0.0121766	0.0974125	13	1
chr10	5580000	5615000	KLF6	NM_001160125.2	chr10	3815780	3829435	chr10	5585923	5594543	8	8	657	0.0121766	0.0974125	13	1
chr10	5580000	5615000	KLF6	NM_001300.6	chr10	3815780	3829435	chr10	5585923	5594543	8	8	657	0.0121766	0.0974125	13	1
chr14	50305000	50415000	KLHDC2	NM_014315.3	chr14	50233105	50238659	chr14	50327194	50331213	11	11	139	0.0791367	0.870504	9	1
chr7	105125000	105180000	KMT2E	NM_018682.4	chr7	104649161	104658941	chr7	105133327	105135076	3	3	602	0.00498339	0.0149502	1	1
chr7	105125000	105180000	KMT2E	NM_182931.3	chr7	104649161	104658941	chr7	105133327	105135076	3	3	602	0.00498339	0.0149502	1	1
chr1	155040000	155155000	KRTCAP2	NM_173852.4	chr1	155040995	155042444	chr1	155144372	155168686	8	105	399	0.263158	27.6316	5	4
chr1	155040000	155155000	KRTCAP2	NM_173852.4	chr1	155063372	155068587	chr1	155144372	155168686	24	105	399	0.263158	27.6316	5	3
chr1	155040000	155155000	KRTCAP2	NM_173852.4	chr1	155088467	155094190	chr1	155144372	155168686	32	105	399	0.263158	27.6316	5	2
chr1	155040000	155155000	KRTCAP2	NM_173852.4	chr1	155130934	155132168	chr1	155144372	155168686	8	105	399	0.263158	27.6316	5	4
chr1	155040000	155155000	KRTCAP2	NM_173852.4	chr1	155138824	155141362	chr1	155144372	155168686	33	105	399	0.263158	27.6316	5	1
chr1	155900000	155970000	LAMTOR2	NM_001145264.2	chr1	155930170	155933104	chr1	156022445	156026523	7	20	89	0.224719	4.49438	3	1
chr1	155900000	155970000	LAMTOR2	NM_001145264.2	chr1	155907556	155908677	chr1	156022445	156026523	7	20	89	0.224719	4.49438	3	1
chr1	155900000	155970000	LAMTOR2	NM_001145264.2	chr1	155939807	155941614	chr1	156022445	156026523	6	20	89	0.224719	4.49438	3	2
chr1	155900000	155970000	LAMTOR2	NM_014017.4	chr1	155930170	155933104	chr1	156022445	156026523	7	20	89	0.224719	4.49438	3	1
chr1	155900000	155970000	LAMTOR2	NM_014017.4	chr1	155939807	155941614	chr1	156022445	156026523	6	20	89	0.224719	4.49438	3	2
chr1	155900000	155970000	LAMTOR2	NM_014017.4	chr1	155907556	155908677	chr1	156022445	156026523	7	20	89	0.224719	4.49438	3	1
chr17	37435000	38350000	LASP1	NM_001271608.2	chr17	37022753	37051228	chr17	37432275	37441394	4	15	226	0.0663717	0.995575	8	2
chr17	37435000	38350000	LASP1	NM_001271608.2	chr17	37022753	37051228	chr17	37512244	37525129	3	15	226	0.0663717	0.995575	8	3
chr17	37435000	38350000	LASP1	NM_001271608.2	chr17	37022753	37051228	chr17	37527421	37539649	5	15	226	0.0663717	0.995575	8	1
chr17	37435000	38350000	LASP1	NM_001271608.2	chr17	37022753	37051228	chr17	37584997	37600537	3	15	226	0.0663717	0.995575	8	3
chr17	37435000	38350000	LASP1	NM_006148.4	chr17	37022753	37051228	chr17	37432275	37441394	4	15	226	0.0663717	0.995575	8	2
chr17	37435000	38350000	LASP1	NM_006148.4	chr17	37022753	37051228	chr17	37512244	37525129	3	15	226	0.0663717	0.995575	8	3
chr17	37435000	38350000	LASP1	NM_006148.4	chr17	37022753	37051228	chr17	37527421	37539649	5	15	226	0.0663717	0.995575	8	1
chr17	37435000	38350000	LASP1	NM_006148.4	chr17	37022753	37051228	chr17	37584997	37600537	3	15	226	0.0663717	0.995575	8	3
chr6	151905000	151995000	LATS1	NM_001270519.2	chr6	150038152	150042627	chr6	151978670	151983985	4	4	111	0.036036	0.144144	7	1
chr6	151905000	151995000	LATS1	NM_001350339.2	chr6	150038152	150042627	chr6	151978670	151983985	4	4	111	0.036036	0.144144	7	1
chr6	151905000	151995000	LATS1	NM_001350340.2	chr6	150038152	150042627	chr6	151978670	151983985	4	4	111	0.036036	0.144144	7	1
chr6	151905000	151995000	LATS1	NM_001350392.2	chr6	150038152	150042627	chr6	151978670	151983985	4	4	111	0.036036	0.144144	7	1
chr6	151905000	151995000	LATS1	NM_004690.4	chr6	150038152	150042627	chr6	151978670	151983985	4	4	111	0.036036	0.144144	7	1
chr19	12960000	13275000	LDLR	NM_000527.5	chr19	11194094	11203937	chr19	13160643	13177345	3	3	529	0.00567108	0.0170132	29	1
chr19	12960000	13275000	LDLR	NM_001195798.2	chr19	11194094	11203937	chr19	13160643	13177345	3	3	529	0.00567108	0.0170132	29	1
chr19	12960000	13275000	LDLR	NM_001195799.2	chr19	11194094	11203937	chr19	13160643	13177345	3	3	529	0.00567108	0.0170132	29	1
chr19	12960000	13275000	LDLR	NM_001195800.2	chr19	11194094	11203937	chr19	13160643	13177345	3	3	529	0.00567108	0.0170132	29	1
chr19	12960000	13275000	LDLR	NM_001195803.2	chr19	11194094	11203937	chr19	13160643	13177345	3	3	529	0.00567108	0.0170132	29	1
chr1	155040000	155155000	LMNA	NM_001257374.3	chr1	155088467	155094190	chr1	156082127	156100747	5	5	733	0.00682128	0.0341064	17	1
chr1	155040000	155155000	LMNA	NM_001282624.2	chr1	155088467	155094190	chr1	156082127	156100747	5	5	733	0.00682128	0.0341064	17	1
chr1	155040000	155155000	LMNA	NM_001282626.2	chr1	155088467	155094190	chr1	156082127	156100747	5	5	733	0.00682128	0.0341064	17	1
chr1	155040000	155155000	LMNA	NM_005572.4	chr1	155088467	155094190	chr1	156082127	156100747	5	5	733	0.00682128	0.0341064	17	1
chr1	155040000	155155000	LMNA	NM_170707.4	chr1	155088467	155094190	chr1	156082127	156100747	5	5	733	0.00682128	0.0341064	17	1
chr1	155040000	155155000	LMNA	NM_170708.4	chr1	155088467	155094190	chr1	156082127	156100747	5	5	733	0.00682128	0.0341064	17	1
chr1	155900000	155970000	LMNA	NM_001257374.3	chr1	155958552	155959968	chr1	156082127	156100747	7	26	733	0.0354707	0.922237	4	1
chr1	155900000	155970000	LMNA	NM_001257374.3	chr1	155939807	155941614	chr1	156082127	156100747	4	26	733	0.0354707	0.922237	4	3
chr1	155900000	155970000	LMNA	NM_001257374.3	chr1	155900752	155902678	chr1	156082127	156100747	5	26	733	0.0354707	0.922237	4	2
chr1	155900000	155970000	LMNA	NM_001257374.3	chr1	155926398	155928783	chr1	156082127	156100747	3	26	733	0.0354707	0.922237	4	4
chr1	155900000	155970000	LMNA	NM_001257374.3	chr1	155930170	155933104	chr1	156082127	156100747	7	26	733	0.0354707	0.922237	4	1
chr1	155900000	155970000	LMNA	NM_001282624.2	chr1	155939807	155941614	chr1	156082127	156100747	4	26	733	0.0354707	0.922237	4	3
chr1	155900000	155970000	LMNA	NM_001282624.2	chr1	155958552	155959968	chr1	156082127	156100747	7	26	733	0.0354707	0.922237	4	1
chr1	155900000	155970000	LMNA	NM_001282624.2	chr1	155930170	155933104	chr1	156082127	156100747	7	26	733	0.0354707	0.922237	4	1
chr1	155900000	155970000	LMNA	NM_001282624.2	chr1	155926398	155928783	chr1	156082127	156100747	3	26	733	0.0354707	0.922237	4	4
[truncated: 4,057 more rows]

## Sheet: BRCA_ZR751
Table S2d: RENC results from ZR751 cells
duplication_chr	duplication_start	duplication_end	gene_name	gene_ID	anchor1_chr	anchor1_start	anchor1_end	anchor2_chr	anchor2_start	anchor2_end	pets	dup_sum_pets	gene_ID_sum_pets	percentage	RENC_score	gene_rank	enhancer_rank
chr17	27430000	27540000	ABHD15	NM_198147.3	chr17	27470591	27488148	chr17	27888911	27905334	6	6	106	0.0566038	0.339623	9	1
chr19	17315000	17350000	ABHD8	NM_024527.5	chr19	17328182	17332218	chr19	17411524	17424386	7	22	478	0.0460251	1.01255	7	2
chr19	17315000	17350000	ABHD8	NM_024527.5	chr19	17345318	17348456	chr19	17411524	17424386	15	22	478	0.0460251	1.01255	7	1
chr19	17395000	17455000	ABHD8	NM_024527.5	chr19	17411524	17424386	chr19	17425652	17434402	133	374	478	0.782427	292.628	1	2
chr19	17395000	17455000	ABHD8	NM_024527.5	chr19	17411524	17424386	chr19	17434812	17442518	68	374	478	0.782427	292.628	1	3
chr19	17395000	17455000	ABHD8	NM_024527.5	chr19	17399998	17407884	chr19	17411524	17424386	173	374	478	0.782427	292.628	1	1
chr11	34460000	34945000	ABTB2	NM_145804.3	chr11	34378037	34381935	chr11	34591336	34593363	4	4	112	0.0357143	0.142857	5	1
chr1	1215000	1460000	ACAP3	NM_030649.3	chr1	1237447	1247831	chr1	1249198	1252080	44	133	150	0.886667	117.927	1	1
chr1	1215000	1460000	ACAP3	NM_030649.3	chr1	1237447	1247831	chr1	1253011	1254726	28	133	150	0.886667	117.927	1	3
chr1	1215000	1460000	ACAP3	NM_030649.3	chr1	1235267	1236742	chr1	1237447	1247831	37	133	150	0.886667	117.927	1	2
chr1	1215000	1460000	ACAP3	NM_030649.3	chr1	1222297	1230919	chr1	1237447	1247831	18	133	150	0.886667	117.927	1	4
chr1	1215000	1460000	ACAP3	NM_030649.3	chr1	1237447	1247831	chr1	1299220	1300367	6	133	150	0.886667	117.927	1	5
chr20	32250000	32350000	ACTL10	NM_001024675.2	chr20	32250431	32264940	chr20	32290113	32292072	7	60	456	0.131579	7.89474	4	3
chr20	32250000	32350000	ACTL10	NM_001024675.2	chr20	32250431	32264940	chr20	32301092	32302833	15	60	456	0.131579	7.89474	4	2
chr20	32250000	32350000	ACTL10	NM_001024675.2	chr20	32250431	32264940	chr20	32311863	32315583	38	60	456	0.131579	7.89474	4	1
chr1	155040000	155155000	ADAM15	NM_001261464.2	chr1	155008356	155027473	chr1	155040995	155042444	69	275	584	0.47089	129.495	3	2
chr1	155040000	155155000	ADAM15	NM_001261464.2	chr1	155008356	155027473	chr1	155042920	155044329	26	275	584	0.47089	129.495	3	4
chr1	155040000	155155000	ADAM15	NM_001261464.2	chr1	155008356	155027473	chr1	155044748	155046810	73	275	584	0.47089	129.495	3	1
chr1	155040000	155155000	ADAM15	NM_001261464.2	chr1	155008356	155027473	chr1	155063372	155068587	49	275	584	0.47089	129.495	3	3
chr1	155040000	155155000	ADAM15	NM_001261464.2	chr1	155008356	155027473	chr1	155077656	155078983	9	275	584	0.47089	129.495	3	8
chr1	155040000	155155000	ADAM15	NM_001261464.2	chr1	155008356	155027473	chr1	155088467	155094190	21	275	584	0.47089	129.495	3	5
chr1	155040000	155155000	ADAM15	NM_001261464.2	chr1	155008356	155027473	chr1	155130934	155132168	12	275	584	0.47089	129.495	3	7
chr1	155040000	155155000	ADAM15	NM_001261464.2	chr1	155008356	155027473	chr1	155138824	155141362	16	275	584	0.47089	129.495	3	6
chr1	155040000	155155000	ADAM15	NM_001261465.2	chr1	155008356	155027473	chr1	155040995	155042444	69	275	584	0.47089	129.495	3	2
chr1	155040000	155155000	ADAM15	NM_001261465.2	chr1	155008356	155027473	chr1	155042920	155044329	26	275	584	0.47089	129.495	3	4
chr1	155040000	155155000	ADAM15	NM_001261465.2	chr1	155008356	155027473	chr1	155044748	155046810	73	275	584	0.47089	129.495	3	1
chr1	155040000	155155000	ADAM15	NM_001261465.2	chr1	155008356	155027473	chr1	155063372	155068587	49	275	584	0.47089	129.495	3	3
chr1	155040000	155155000	ADAM15	NM_001261465.2	chr1	155008356	155027473	chr1	155077656	155078983	9	275	584	0.47089	129.495	3	8
chr1	155040000	155155000	ADAM15	NM_001261465.2	chr1	155008356	155027473	chr1	155088467	155094190	21	275	584	0.47089	129.495	3	5
chr1	155040000	155155000	ADAM15	NM_001261465.2	chr1	155008356	155027473	chr1	155130934	155132168	12	275	584	0.47089	129.495	3	7
chr1	155040000	155155000	ADAM15	NM_001261465.2	chr1	155008356	155027473	chr1	155138824	155141362	16	275	584	0.47089	129.495	3	6
chr1	155040000	155155000	ADAM15	NM_001261466.2	chr1	155008356	155027473	chr1	155040995	155042444	69	275	584	0.47089	129.495	3	2
chr1	155040000	155155000	ADAM15	NM_001261466.2	chr1	155008356	155027473	chr1	155042920	155044329	26	275	584	0.47089	129.495	3	4
chr1	155040000	155155000	ADAM15	NM_001261466.2	chr1	155008356	155027473	chr1	155044748	155046810	73	275	584	0.47089	129.495	3	1
chr1	155040000	155155000	ADAM15	NM_001261466.2	chr1	155008356	155027473	chr1	155063372	155068587	49	275	584	0.47089	129.495	3	3
chr1	155040000	155155000	ADAM15	NM_001261466.2	chr1	155008356	155027473	chr1	155077656	155078983	9	275	584	0.47089	129.495	3	8
chr1	155040000	155155000	ADAM15	NM_001261466.2	chr1	155008356	155027473	chr1	155088467	155094190	21	275	584	0.47089	129.495	3	5
chr1	155040000	155155000	ADAM15	NM_001261466.2	chr1	155008356	155027473	chr1	155130934	155132168	12	275	584	0.47089	129.495	3	7
chr1	155040000	155155000	ADAM15	NM_001261466.2	chr1	155008356	155027473	chr1	155138824	155141362	16	275	584	0.47089	129.495	3	6
chr1	155040000	155155000	ADAM15	NM_003815.5	chr1	155008356	155027473	chr1	155040995	155042444	69	275	584	0.47089	129.495	3	2
chr1	155040000	155155000	ADAM15	NM_003815.5	chr1	155008356	155027473	chr1	155042920	155044329	26	275	584	0.47089	129.495	3	4
chr1	155040000	155155000	ADAM15	NM_003815.5	chr1	155008356	155027473	chr1	155044748	155046810	73	275	584	0.47089	129.495	3	1
chr1	155040000	155155000	ADAM15	NM_003815.5	chr1	155008356	155027473	chr1	155063372	155068587	49	275	584	0.47089	129.495	3	3
chr1	155040000	155155000	ADAM15	NM_003815.5	chr1	155008356	155027473	chr1	155077656	155078983	9	275	584	0.47089	129.495	3	8
chr1	155040000	155155000	ADAM15	NM_003815.5	chr1	155008356	155027473	chr1	155088467	155094190	21	275	584	0.47089	129.495	3	5
chr1	155040000	155155000	ADAM15	NM_003815.5	chr1	155008356	155027473	chr1	155130934	155132168	12	275	584	0.47089	129.495	3	7
chr1	155040000	155155000	ADAM15	NM_003815.5	chr1	155008356	155027473	chr1	155138824	155141362	16	275	584	0.47089	129.495	3	6
chr1	155040000	155155000	ADAM15	NM_207191.3	chr1	155008356	155027473	chr1	155040995	155042444	69	275	584	0.47089	129.495	3	2
chr1	155040000	155155000	ADAM15	NM_207191.3	chr1	155008356	155027473	chr1	155042920	155044329	26	275	584	0.47089	129.495	3	4
chr1	155040000	155155000	ADAM15	NM_207191.3	chr1	155008356	155027473	chr1	155044748	155046810	73	275	584	0.47089	129.495	3	1
chr1	155040000	155155000	ADAM15	NM_207191.3	chr1	155008356	155027473	chr1	155063372	155068587	49	275	584	0.47089	129.495	3	3
chr1	155040000	155155000	ADAM15	NM_207191.3	chr1	155008356	155027473	chr1	155077656	155078983	9	275	584	0.47089	129.495	3	8
chr1	155040000	155155000	ADAM15	NM_207191.3	chr1	155008356	155027473	chr1	155088467	155094190	21	275	584	0.47089	129.495	3	5
chr1	155040000	155155000	ADAM15	NM_207191.3	chr1	155008356	155027473	chr1	155130934	155132168	12	275	584	0.47089	129.495	3	7
chr1	155040000	155155000	ADAM15	NM_207191.3	chr1	155008356	155027473	chr1	155138824	155141362	16	275	584	0.47089	129.495	3	6
chr1	155040000	155155000	ADAM15	NM_207194.3	chr1	155008356	155027473	chr1	155040995	155042444	69	275	584	0.47089	129.495	3	2
chr1	155040000	155155000	ADAM15	NM_207194.3	chr1	155008356	155027473	chr1	155042920	155044329	26	275	584	0.47089	129.495	3	4
chr1	155040000	155155000	ADAM15	NM_207194.3	chr1	155008356	155027473	chr1	155044748	155046810	73	275	584	0.47089	129.495	3	1
chr1	155040000	155155000	ADAM15	NM_207194.3	chr1	155008356	155027473	chr1	155063372	155068587	49	275	584	0.47089	129.495	3	3
chr1	155040000	155155000	ADAM15	NM_207194.3	chr1	155008356	155027473	chr1	155077656	155078983	9	275	584	0.47089	129.495	3	8
chr1	155040000	155155000	ADAM15	NM_207194.3	chr1	155008356	155027473	chr1	155088467	155094190	21	275	584	0.47089	129.495	3	5
chr1	155040000	155155000	ADAM15	NM_207194.3	chr1	155008356	155027473	chr1	155130934	155132168	12	275	584	0.47089	129.495	3	7
chr1	155040000	155155000	ADAM15	NM_207194.3	chr1	155008356	155027473	chr1	155138824	155141362	16	275	584	0.47089	129.495	3	6
chr1	155040000	155155000	ADAM15	NM_207195.3	chr1	155008356	155027473	chr1	155040995	155042444	69	275	584	0.47089	129.495	3	2
chr1	155040000	155155000	ADAM15	NM_207195.3	chr1	155008356	155027473	chr1	155042920	155044329	26	275	584	0.47089	129.495	3	4
chr1	155040000	155155000	ADAM15	NM_207195.3	chr1	155008356	155027473	chr1	155044748	155046810	73	275	584	0.47089	129.495	3	1
chr1	155040000	155155000	ADAM15	NM_207195.3	chr1	155008356	155027473	chr1	155063372	155068587	49	275	584	0.47089	129.495	3	3
chr1	155040000	155155000	ADAM15	NM_207195.3	chr1	155008356	155027473	chr1	155077656	155078983	9	275	584	0.47089	129.495	3	8
chr1	155040000	155155000	ADAM15	NM_207195.3	chr1	155008356	155027473	chr1	155088467	155094190	21	275	584	0.47089	129.495	3	5
chr1	155040000	155155000	ADAM15	NM_207195.3	chr1	155008356	155027473	chr1	155130934	155132168	12	275	584	0.47089	129.495	3	7
chr1	155040000	155155000	ADAM15	NM_207195.3	chr1	155008356	155027473	chr1	155138824	155141362	16	275	584	0.47089	129.495	3	6
chr1	155040000	155155000	ADAM15	NM_207196.3	chr1	155008356	155027473	chr1	155040995	155042444	69	275	584	0.47089	129.495	3	2
chr1	155040000	155155000	ADAM15	NM_207196.3	chr1	155008356	155027473	chr1	155042920	155044329	26	275	584	0.47089	129.495	3	4
chr1	155040000	155155000	ADAM15	NM_207196.3	chr1	155008356	155027473	chr1	155044748	155046810	73	275	584	0.47089	129.495	3	1
chr1	155040000	155155000	ADAM15	NM_207196.3	chr1	155008356	155027473	chr1	155063372	155068587	49	275	584	0.47089	129.495	3	3
chr1	155040000	155155000	ADAM15	NM_207196.3	chr1	155008356	155027473	chr1	155077656	155078983	9	275	584	0.47089	129.495	3	8
chr1	155040000	155155000	ADAM15	NM_207196.3	chr1	155008356	155027473	chr1	155088467	155094190	21	275	584	0.47089	129.495	3	5
chr1	155040000	155155000	ADAM15	NM_207196.3	chr1	155008356	155027473	chr1	155130934	155132168	12	275	584	0.47089	129.495	3	7
chr1	155040000	155155000	ADAM15	NM_207196.3	chr1	155008356	155027473	chr1	155138824	155141362	16	275	584	0.47089	129.495	3	6
chr1	155040000	155155000	ADAM15	NM_207197.3	chr1	155008356	155027473	chr1	155040995	155042444	69	275	584	0.47089	129.495	3	2
chr1	155040000	155155000	ADAM15	NM_207197.3	chr1	155008356	155027473	chr1	155042920	155044329	26	275	584	0.47089	129.495	3	4
chr1	155040000	155155000	ADAM15	NM_207197.3	chr1	155008356	155027473	chr1	155044748	155046810	73	275	584	0.47089	129.495	3	1
chr1	155040000	155155000	ADAM15	NM_207197.3	chr1	155008356	155027473	chr1	155063372	155068587	49	275	584	0.47089	129.495	3	3
chr1	155040000	155155000	ADAM15	NM_207197.3	chr1	155008356	155027473	chr1	155077656	155078983	9	275	584	0.47089	129.495	3	8
chr1	155040000	155155000	ADAM15	NM_207197.3	chr1	155008356	155027473	chr1	155088467	155094190	21	275	584	0.47089	129.495	3	5
chr1	155040000	155155000	ADAM15	NM_207197.3	chr1	155008356	155027473	chr1	155130934	155132168	12	275	584	0.47089	129.495	3	7
chr1	155040000	155155000	ADAM15	NM_207197.3	chr1	155008356	155027473	chr1	155138824	155141362	16	275	584	0.47089	129.495	3	6
chr20	48930000	48970000	ADNP	NM_001282531.3	chr20	48954956	48965215	chr20	49545238	49550284	3	3	118	0.0254237	0.0762712	7	1
chr20	48930000	48970000	ADNP	NM_001347511.2	chr20	48954956	48965215	chr20	49545238	49550284	3	3	118	0.0254237	0.0762712	7	1
chr20	48930000	48970000	ADNP	NM_015339.5	chr20	48954956	48965215	chr20	49545238	49550284	3	3	118	0.0254237	0.0762712	7	1
chr20	48930000	48970000	ADNP	NM_181442.4	chr20	48954956	48965215	chr20	49545238	49550284	3	3	118	0.0254237	0.0762712	7	1
chr14	105160000	105210000	ADSS1	NM_152328.5	chr14	105180766	105183090	chr14	105186343	105193448	15	15	50	0.3	4.5	2	1
chr14	105280000	105300000	AHNAK2	NM_001350929.2	chr14	105285460	105288208	chr14	105432715	105447250	4	8	65	0.123077	0.984615	4	1
chr14	105280000	105300000	AHNAK2	NM_001350929.2	chr14	105292371	105294815	chr14	105432715	105447250	4	8	65	0.123077	0.984615	4	1
chr14	105280000	105300000	AHNAK2	NM_138420.4	chr14	105285460	105288208	chr14	105432715	105447250	4	8	65	0.123077	0.984615	4	1
chr14	105280000	105300000	AHNAK2	NM_138420.4	chr14	105292371	105294815	chr14	105432715	105447250	4	8	65	0.123077	0.984615	4	1
chr14	105280000	105300000	AKT1	NM_001014431.2	chr14	105260038	105264404	chr14	105281064	105283703	8	22	36	0.611111	13.4444	2	2
chr14	105280000	105300000	AKT1	NM_001014431.2	chr14	105260038	105264404	chr14	105285460	105288208	14	22	36	0.611111	13.4444	2	1
chr14	105280000	105300000	AKT1	NM_001014432.2	chr14	105260038	105264404	chr14	105281064	105283703	8	22	36	0.611111	13.4444	2	2
chr14	105280000	105300000	AKT1	NM_001014432.2	chr14	105260038	105264404	chr14	105285460	105288208	14	22	36	0.611111	13.4444	2	1
chr14	105280000	105300000	AKT1	NM_001382430.1	chr14	105260038	105264404	chr14	105285460	105288208	14	22	36	0.611111	13.4444	2	1
chr14	105280000	105300000	AKT1	NM_001382430.1	chr14	105260038	105264404	chr14	105281064	105283703	8	22	36	0.611111	13.4444	2	2
chr14	105280000	105300000	AKT1	NM_001382431.1	chr14	105260038	105264404	chr14	105281064	105283703	8	22	36	0.611111	13.4444	2	2
chr14	105280000	105300000	AKT1	NM_001382431.1	chr14	105260038	105264404	chr14	105285460	105288208	14	22	36	0.611111	13.4444	2	1
chr14	105280000	105300000	AKT1	NM_001382432.1	chr14	105260038	105264404	chr14	105281064	105283703	8	22	36	0.611111	13.4444	2	2
chr14	105280000	105300000	AKT1	NM_001382432.1	chr14	105260038	105264404	chr14	105285460	105288208	14	22	36	0.611111	13.4444	2	1
chr14	105280000	105300000	AKT1	NM_001382433.1	chr14	105260038	105264404	chr14	105281064	105283703	8	22	36	0.611111	13.4444	2	2
chr14	105280000	105300000	AKT1	NM_001382433.1	chr14	105260038	105264404	chr14	105285460	105288208	14	22	36	0.611111	13.4444	2	1
chr19	17315000	17350000	ANKLE1	NM_001278443.2	chr19	17345318	17348456	chr19	17392062	17395007	7	7	31	0.225806	1.58065	5	1
chr19	17315000	17350000	ANKLE1	NM_001278444.2	chr19	17345318	17348456	chr19	17392062	17395007	7	7	31	0.225806	1.58065	5	1
chr19	17315000	17350000	ANKLE1	NM_001278445.2	chr19	17345318	17348456	chr19	17392062	17395007	7	7	31	0.225806	1.58065	5	1
chr19	17315000	17350000	ANKLE1	NM_152363.6	chr19	17345318	17348456	chr19	17392062	17395007	7	7	31	0.225806	1.58065	5	1
chr19	17395000	17455000	ANKLE1	NM_001278443.2	chr19	17392062	17395007	chr19	17399998	17407884	20	20	31	0.645161	12.9032	6	1
chr19	17395000	17455000	ANKLE1	NM_001278444.2	chr19	17392062	17395007	chr19	17399998	17407884	20	20	31	0.645161	12.9032	6	1
chr19	17395000	17455000	ANKLE1	NM_001278445.2	chr19	17392062	17395007	chr19	17399998	17407884	20	20	31	0.645161	12.9032	6	1
chr19	17395000	17455000	ANKLE1	NM_152363.6	chr19	17392062	17395007	chr19	17399998	17407884	20	20	31	0.645161	12.9032	6	1
chr10	5785000	5805000	ANKRD16	NM_001009941.3	chr10	5804015	5806636	chr10	5927366	5933635	3	3	12	0.25	0.75	1	1
chr10	5785000	5805000	ANKRD16	NM_001009943.3	chr10	5804015	5806636	chr10	5927366	5933635	3	3	12	0.25	0.75	1	1
chr10	5785000	5805000	ANKRD16	NM_019046.3	chr10	5804015	5806636	chr10	5927366	5933635	3	3	12	0.25	0.75	1	1
chr19	17315000	17350000	ANO8	NM_020959.3	chr19	17345318	17348456	chr19	17442965	17452305	9	19	439	0.0432802	0.822323	8	1
chr19	17315000	17350000	ANO8	NM_020959.3	chr19	17315736	17318769	chr19	17442965	17452305	4	19	439	0.0432802	0.822323	8	3
chr19	17315000	17350000	ANO8	NM_020959.3	chr19	17328182	17332218	chr19	17442965	17452305	6	19	439	0.0432802	0.822323	8	2
chr19	17395000	17455000	ANO8	NM_020959.3	chr19	17425652	17434402	chr19	17442965	17452305	74	271	439	0.617312	167.292	2	2
chr19	17395000	17455000	ANO8	NM_020959.3	chr19	17399998	17407884	chr19	17442965	17452305	66	271	439	0.617312	167.292	2	3
chr19	17395000	17455000	ANO8	NM_020959.3	chr19	17434812	17442518	chr19	17442965	17452305	131	271	439	0.617312	167.292	2	1
chr11	34460000	34945000	APIP	NM_015957.4	chr11	34581734	34583752	chr11	34936177	34941477	4	77	133	0.578947	44.5789	3	6
chr11	34460000	34945000	APIP	NM_015957.4	chr11	34591336	34593363	chr11	34936177	34941477	5	77	133	0.578947	44.5789	3	5
chr11	34460000	34945000	APIP	NM_015957.4	chr11	34595067	34596442	chr11	34936177	34941477	4	77	133	0.578947	44.5789	3	6
chr11	34460000	34945000	APIP	NM_015957.4	chr11	34607365	34609498	chr11	34936177	34941477	6	77	133	0.578947	44.5789	3	4
chr11	34460000	34945000	APIP	NM_015957.4	chr11	34674138	34679111	chr11	34936177	34941477	9	77	133	0.578947	44.5789	3	3
chr11	34460000	34945000	APIP	NM_015957.4	chr11	34689048	34690397	chr11	34936177	34941477	4	77	133	0.578947	44.5789	3	6
chr11	34460000	34945000	APIP	NM_015957.4	chr11	34766413	34767638	chr11	34936177	34941477	3	77	133	0.578947	44.5789	3	7
chr11	34460000	34945000	APIP	NM_015957.4	chr11	34918613	34921472	chr11	34936177	34941477	14	77	133	0.578947	44.5789	3	2
chr11	34460000	34945000	APIP	NM_015957.4	chr11	34931187	34934052	chr11	34936177	34941477	28	77	133	0.578947	44.5789	3	1
chr12	12020000	12210000	APOLD1	NM_001130415.2	chr12	12027085	12033230	chr12	12866703	12881004	3	17	654	0.0259939	0.441896	2	2
chr12	12020000	12210000	APOLD1	NM_001130415.2	chr12	12037482	12040026	chr12	12866703	12881004	5	17	654	0.0259939	0.441896	2	1
chr12	12020000	12210000	APOLD1	NM_001130415.2	chr12	12074664	12076067	chr12	12866703	12881004	3	17	654	0.0259939	0.441896	2	2
chr12	12020000	12210000	APOLD1	NM_001130415.2	chr12	12125117	12129630	chr12	12866703	12881004	3	17	654	0.0259939	0.441896	2	2
chr12	12020000	12210000	APOLD1	NM_001130415.2	chr12	12176644	12179414	chr12	12866703	12881004	3	17	654	0.0259939	0.441896	2	2
chr17	57855000	58625000	APPBP2	NM_001282476.2	chr17	58167891	58171580	chr17	58600844	58604752	5	35	69	0.507246	17.7536	7	4
chr17	57855000	58625000	APPBP2	NM_001282476.2	chr17	58238410	58242905	chr17	58600844	58604752	3	35	69	0.507246	17.7536	7	5
chr17	57855000	58625000	APPBP2	NM_001282476.2	chr17	57898568	57951001	chr17	58600844	58604752	7	35	69	0.507246	17.7536	7	2
chr17	57855000	58625000	APPBP2	NM_001282476.2	chr17	57859950	57872352	chr17	58600844	58604752	3	35	69	0.507246	17.7536	7	5
chr17	57855000	58625000	APPBP2	NM_001282476.2	chr17	58557684	58559095	chr17	58600844	58604752	11	35	69	0.507246	17.7536	7	1
chr17	57855000	58625000	APPBP2	NM_001282476.2	chr17	58429026	58436775	chr17	58600844	58604752	6	35	69	0.507246	17.7536	7	3
chr17	57855000	58625000	APPBP2	NM_006380.5	chr17	57898568	57951001	chr17	58600844	58604752	7	35	69	0.507246	17.7536	7	2
chr17	57855000	58625000	APPBP2	NM_006380.5	chr17	58167891	58171580	chr17	58600844	58604752	5	35	69	0.507246	17.7536	7	4
chr17	57855000	58625000	APPBP2	NM_006380.5	chr17	58557684	58559095	chr17	58600844	58604752	11	35	69	0.507246	17.7536	7	1
chr17	57855000	58625000	APPBP2	NM_006380.5	chr17	57859950	57872352	chr17	58600844	58604752	3	35	69	0.507246	17.7536	7	5
chr17	57855000	58625000	APPBP2	NM_006380.5	chr17	58238410	58242905	chr17	58600844	58604752	3	35	69	0.507246	17.7536	7	5
chr17	57855000	58625000	APPBP2	NM_006380.5	chr17	58429026	58436775	chr17	58600844	58604752	6	35	69	0.507246	17.7536	7	3
chr11	72895000	72925000	ARAP1	NM_001040118.3	chr11	72461016	72471018	chr11	72895579	72899778	3	15	379	0.0395778	0.593668	8	3
chr11	72895000	72925000	ARAP1	NM_001040118.3	chr11	72461016	72471018	chr11	72900568	72909187	12	15	379	0.0395778	0.593668	8	1
chr11	72895000	72925000	ARAP1	NM_001135190.2	chr11	72428592	72434878	chr11	72900568	72909187	5	5	16	0.3125	1.5625	7	2
chr11	72895000	72925000	ARAP1	NM_001369489.1	chr11	72428592	72434878	chr11	72900568	72909187	5	5	16	0.3125	1.5625	7	2
chr11	72895000	72925000	ARAP1	NM_015242.5	chr11	72428592	72434878	chr11	72900568	72909187	5	5	16	0.3125	1.5625	7	2
chr14	50305000	50415000	ARF6	NM_001663.4	chr14	50327194	50331213	chr14	50358562	50363554	26	171	649	0.263482	45.0555	1	4
chr14	50305000	50415000	ARF6	NM_001663.4	chr14	50331503	50332862	chr14	50358562	50363554	13	171	649	0.263482	45.0555	1	5
chr14	50305000	50415000	ARF6	NM_001663.4	chr14	50333438	50336409	chr14	50358562	50363554	35	171	649	0.263482	45.0555	1	2
chr14	50305000	50415000	ARF6	NM_001663.4	chr14	50345960	50347253	chr14	50358562	50363554	32	171	649	0.263482	45.0555	1	3
chr14	50305000	50415000	ARF6	NM_001663.4	chr14	50358562	50363554	chr14	50371448	50376819	44	171	649	0.263482	45.0555	1	1
chr14	50305000	50415000	ARF6	NM_001663.4	chr14	50358562	50363554	chr14	50377976	50379101	9	171	649	0.263482	45.0555	1	7
chr14	50305000	50415000	ARF6	NM_001663.4	chr14	50358562	50363554	chr14	50412943	50414241	12	171	649	0.263482	45.0555	1	6
chr17	79960000	80050000	ARHGDIA	NM_001185077.3	chr17	79821494	79830495	chr17	79961252	79965209	7	12	578	0.0207612	0.249135	7	1
chr17	79960000	80050000	ARHGDIA	NM_001185077.3	chr17	79821494	79830495	chr17	79997087	79998524	5	12	578	0.0207612	0.249135	7	2
chr17	79960000	80050000	ARHGDIA	NM_001185078.3	chr17	79821494	79830495	chr17	79961252	79965209	7	12	578	0.0207612	0.249135	7	1
chr17	79960000	80050000	ARHGDIA	NM_001185078.3	chr17	79821494	79830495	chr17	79997087	79998524	5	12	578	0.0207612	0.249135	7	2
chr17	79960000	80050000	ARHGDIA	NM_001301240.2	chr17	79821494	79830495	chr17	79961252	79965209	7	12	578	0.0207612	0.249135	7	1
chr17	79960000	80050000	ARHGDIA	NM_001301240.2	chr17	79821494	79830495	chr17	79997087	79998524	5	12	578	0.0207612	0.249135	7	2
chr17	79960000	80050000	ARHGDIA	NM_001301241.2	chr17	79821494	79830495	chr17	79961252	79965209	7	12	578	0.0207612	0.249135	7	1
chr17	79960000	80050000	ARHGDIA	NM_001301241.2	chr17	79821494	79830495	chr17	79997087	79998524	5	12	578	0.0207612	0.249135	7	2
chr17	79960000	80050000	ARHGDIA	NM_001301242.2	chr17	79821494	79830495	chr17	79961252	79965209	7	12	578	0.0207612	0.249135	7	1
chr17	79960000	80050000	ARHGDIA	NM_001301242.2	chr17	79821494	79830495	chr17	79997087	79998524	5	12	578	0.0207612	0.249135	7	2
chr17	79960000	80050000	ARHGDIA	NM_001301243.2	chr17	79821494	79830495	chr17	79961252	79965209	7	12	578	0.0207612	0.249135	7	1
chr17	79960000	80050000	ARHGDIA	NM_001301243.2	chr17	79821494	79830495	chr17	79997087	79998524	5	12	578	0.0207612	0.249135	7	2
chr17	79960000	80050000	ARHGDIA	NM_004309.6	chr17	79821494	79830495	chr17	79961252	79965209	7	12	578	0.0207612	0.249135	7	1
chr17	79960000	80050000	ARHGDIA	NM_004309.6	chr17	79821494	79830495	chr17	79997087	79998524	5	12	578	0.0207612	0.249135	7	2
chr12	14940000	15170000	ARHGDIB	NM_001175.7	chr12	14971490	14973820	chr12	15113318	15115466	6	234	254	0.92126	215.575	2	12
chr12	14940000	15170000	ARHGDIB	NM_001175.7	chr12	14992493	14995483	chr12	15113318	15115466	6	234	254	0.92126	215.575	2	12
chr12	14940000	15170000	ARHGDIB	NM_001175.7	chr12	14997836	15000607	chr12	15113318	15115466	17	234	254	0.92126	215.575	2	6
chr12	14940000	15170000	ARHGDIB	NM_001175.7	chr12	15001920	15004901	chr12	15113318	15115466	10	234	254	0.92126	215.575	2	8
chr12	14940000	15170000	ARHGDIB	NM_001175.7	chr12	15031136	15035722	chr12	15113318	15115466	8	234	254	0.92126	215.575	2	10
chr12	14940000	15170000	ARHGDIB	NM_001175.7	chr12	15041828	15044349	chr12	15113318	15115466	6	234	254	0.92126	215.575	2	12
chr12	14940000	15170000	ARHGDIB	NM_001175.7	chr12	15053119	15060224	chr12	15113318	15115466	64	234	254	0.92126	215.575	2	1
chr12	14940000	15170000	ARHGDIB	NM_001175.7	chr12	15065548	15068125	chr12	15113318	15115466	15	234	254	0.92126	215.575	2	7
chr12	14940000	15170000	ARHGDIB	NM_001175.7	chr12	15087071	15089578	chr12	15113318	15115466	17	234	254	0.92126	215.575	2	6
chr12	14940000	15170000	ARHGDIB	NM_001175.7	chr12	15097841	15100565	chr12	15113318	15115466	46	234	254	0.92126	215.575	2	2
chr12	14940000	15170000	ARHGDIB	NM_001175.7	chr12	15100877	15102816	chr12	15113318	15115466	31	234	254	0.92126	215.575	2	4
chr12	14940000	15170000	ARHGDIB	NM_001175.7	chr12	15113318	15115466	chr12	15156912	15159515	8	234	254	0.92126	215.575	2	10
chr12	14940000	15170000	ARHGDIB	NM_001321420.2	chr12	14971490	14973820	chr12	15113318	15115466	6	234	254	0.92126	215.575	2	12
chr12	14940000	15170000	ARHGDIB	NM_001321420.2	chr12	14992493	14995483	chr12	15113318	15115466	6	234	254	0.92126	215.575	2	12
chr12	14940000	15170000	ARHGDIB	NM_001321420.2	chr12	14997836	15000607	chr12	15113318	15115466	17	234	254	0.92126	215.575	2	6
chr12	14940000	15170000	ARHGDIB	NM_001321420.2	chr12	15001920	15004901	chr12	15113318	15115466	10	234	254	0.92126	215.575	2	8
chr12	14940000	15170000	ARHGDIB	NM_001321420.2	chr12	15031136	15035722	chr12	15113318	15115466	8	234	254	0.92126	215.575	2	10
chr12	14940000	15170000	ARHGDIB	NM_001321420.2	chr12	15041828	15044349	chr12	15113318	15115466	6	234	254	0.92126	215.575	2	12
chr12	14940000	15170000	ARHGDIB	NM_001321420.2	chr12	15053119	15060224	chr12	15113318	15115466	64	234	254	0.92126	215.575	2	1
chr12	14940000	15170000	ARHGDIB	NM_001321420.2	chr12	15065548	15068125	chr12	15113318	15115466	15	234	254	0.92126	215.575	2	7
chr12	14940000	15170000	ARHGDIB	NM_001321420.2	chr12	15087071	15089578	chr12	15113318	15115466	17	234	254	0.92126	215.575	2	6
chr12	14940000	15170000	ARHGDIB	NM_001321420.2	chr12	15097841	15100565	chr12	15113318	15115466	46	234	254	0.92126	215.575	2	2
chr12	14940000	15170000	ARHGDIB	NM_001321420.2	chr12	15100877	15102816	chr12	15113318	15115466	31	234	254	0.92126	215.575	2	4
chr12	14940000	15170000	ARHGDIB	NM_001321420.2	chr12	15113318	15115466	chr12	15156912	15159515	8	234	254	0.92126	215.575	2	10
chr12	14940000	15170000	ARHGDIB	NM_001321421.2	chr12	14971490	14973820	chr12	15113318	15115466	6	234	254	0.92126	215.575	2	12
chr12	14940000	15170000	ARHGDIB	NM_001321421.2	chr12	14992493	14995483	chr12	15113318	15115466	6	234	254	0.92126	215.575	2	12
chr12	14940000	15170000	ARHGDIB	NM_001321421.2	chr12	14997836	15000607	chr12	15113318	15115466	17	234	254	0.92126	215.575	2	6
chr12	14940000	15170000	ARHGDIB	NM_001321421.2	chr12	15001920	15004901	chr12	15113318	15115466	10	234	254	0.92126	215.575	2	8
chr12	14940000	15170000	ARHGDIB	NM_001321421.2	chr12	15031136	15035722	chr12	15113318	15115466	8	234	254	0.92126	215.575	2	10
chr12	14940000	15170000	ARHGDIB	NM_001321421.2	chr12	15041828	15044349	chr12	15113318	15115466	6	234	254	0.92126	215.575	2	12
chr12	14940000	15170000	ARHGDIB	NM_001321421.2	chr12	15053119	15060224	chr12	15113318	15115466	64	234	254	0.92126	215.575	2	1
chr12	14940000	15170000	ARHGDIB	NM_001321421.2	chr12	15065548	15068125	chr12	15113318	15115466	15	234	254	0.92126	215.575	2	7
chr12	14940000	15170000	ARHGDIB	NM_001321421.2	chr12	15087071	15089578	chr12	15113318	15115466	17	234	254	0.92126	215.575	2	6
chr12	14940000	15170000	ARHGDIB	NM_001321421.2	chr12	15097841	15100565	chr12	15113318	15115466	46	234	254	0.92126	215.575	2	2
chr12	14940000	15170000	ARHGDIB	NM_001321421.2	chr12	15100877	15102816	chr12	15113318	15115466	31	234	254	0.92126	215.575	2	4
chr12	14940000	15170000	ARHGDIB	NM_001321421.2	chr12	15113318	15115466	chr12	15156912	15159515	8	234	254	0.92126	215.575	2	10
chr12	14940000	15170000	ARHGDIB	NM_001321422.1	chr12	14971490	14973820	chr12	15103649	15106010	3	135	147	0.918367	123.98	4	13
chr12	14940000	15170000	ARHGDIB	NM_001321422.1	chr12	14997836	15000607	chr12	15103649	15106010	7	135	147	0.918367	123.98	4	11
chr12	14940000	15170000	ARHGDIB	NM_001321422.1	chr12	15021600	15022706	chr12	15103649	15106010	6	135	147	0.918367	123.98	4	12
chr12	14940000	15170000	ARHGDIB	NM_001321422.1	chr12	15053119	15060224	chr12	15103649	15106010	46	135	147	0.918367	123.98	4	2
chr12	14940000	15170000	ARHGDIB	NM_001321422.1	chr12	15065548	15068125	chr12	15103649	15106010	9	135	147	0.918367	123.98	4	9
chr12	14940000	15170000	ARHGDIB	NM_001321422.1	chr12	15087071	15089578	chr12	15103649	15106010	19	135	147	0.918367	123.98	4	5
chr12	14940000	15170000	ARHGDIB	NM_001321422.1	chr12	15097841	15100565	chr12	15103649	15106010	35	135	147	0.918367	123.98	4	3
chr12	14940000	15170000	ARHGDIB	NM_001321422.1	chr12	15103649	15106010	chr12	15110676	15112348	10	135	147	0.918367	123.98	4	8
chr12	14940000	15170000	ARHGDIB	NM_001321423.1	chr12	14971490	14973820	chr12	15103649	15106010	3	135	147	0.918367	123.98	4	13
chr12	14940000	15170000	ARHGDIB	NM_001321423.1	chr12	14997836	15000607	chr12	15103649	15106010	7	135	147	0.918367	123.98	4	11
chr12	14940000	15170000	ARHGDIB	NM_001321423.1	chr12	15021600	15022706	chr12	15103649	15106010	6	135	147	0.918367	123.98	4	12
chr12	14940000	15170000	ARHGDIB	NM_001321423.1	chr12	15053119	15060224	chr12	15103649	15106010	46	135	147	0.918367	123.98	4	2
chr12	14940000	15170000	ARHGDIB	NM_001321423.1	chr12	15065548	15068125	chr12	15103649	15106010	9	135	147	0.918367	123.98	4	9
chr12	14940000	15170000	ARHGDIB	NM_001321423.1	chr12	15087071	15089578	chr12	15103649	15106010	19	135	147	0.918367	123.98	4	5
chr12	14940000	15170000	ARHGDIB	NM_001321423.1	chr12	15097841	15100565	chr12	15103649	15106010	35	135	147	0.918367	123.98	4	3
chr12	14940000	15170000	ARHGDIB	NM_001321423.1	chr12	15103649	15106010	chr12	15110676	15112348	10	135	147	0.918367	123.98	4	8
chr11	72895000	72925000	ARHGEF17	NM_014786.4	chr11	72895579	72899778	chr11	73016656	73023962	4	26	54	0.481481	12.5185	2	2
chr11	72895000	72925000	ARHGEF17	NM_014786.4	chr11	72900568	72909187	chr11	73016656	73023962	22	26	54	0.481481	12.5185	2	1
chr1	155900000	155970000	ARHGEF2	NM_001162383.2	chr1	155900752	155902678	chr1	155943487	155955236	16	347	641	0.541342	187.846	1	7
chr1	155900000	155970000	ARHGEF2	NM_001162383.2	chr1	155930170	155933104	chr1	155943487	155955236	107	347	641	0.541342	187.846	1	1
chr1	155900000	155970000	ARHGEF2	NM_001162383.2	chr1	155943487	155955236	chr1	155960300	155961977	52	347	641	0.541342	187.846	1	3
chr1	155900000	155970000	ARHGEF2	NM_001162383.2	chr1	155907556	155908677	chr1	155943487	155955236	26	347	641	0.541342	187.846	1	6
chr1	155900000	155970000	ARHGEF2	NM_001162383.2	chr1	155939807	155941614	chr1	155943487	155955236	75	347	641	0.541342	187.846	1	2
chr1	155900000	155970000	ARHGEF2	NM_001162383.2	chr1	155943487	155955236	chr1	155958552	155959968	28	347	641	0.541342	187.846	1	5
chr1	155900000	155970000	ARHGEF2	NM_001162383.2	chr1	155924583	155925840	chr1	155943487	155955236	32	347	641	0.541342	187.846	1	4
chr1	155900000	155970000	ARHGEF2	NM_001162383.2	chr1	155926398	155928783	chr1	155943487	155955236	11	347	641	0.541342	187.846	1	8
chr1	155900000	155970000	ARHGEF2	NM_001162384.2	chr1	155924583	155925840	chr1	155943487	155955236	32	347	641	0.541342	187.846	1	4
chr1	155900000	155970000	ARHGEF2	NM_001162384.2	chr1	155907556	155908677	chr1	155943487	155955236	26	347	641	0.541342	187.846	1	6
chr1	155900000	155970000	ARHGEF2	NM_001162384.2	chr1	155943487	155955236	chr1	155958552	155959968	28	347	641	0.541342	187.846	1	5
chr1	155900000	155970000	ARHGEF2	NM_001162384.2	chr1	155939807	155941614	chr1	155943487	155955236	75	347	641	0.541342	187.846	1	2
chr1	155900000	155970000	ARHGEF2	NM_001162384.2	chr1	155900752	155902678	chr1	155943487	155955236	16	347	641	0.541342	187.846	1	7
chr1	155900000	155970000	ARHGEF2	NM_001162384.2	chr1	155930170	155933104	chr1	155943487	155955236	107	347	641	0.541342	187.846	1	1
chr1	155900000	155970000	ARHGEF2	NM_001162384.2	chr1	155926398	155928783	chr1	155943487	155955236	11	347	641	0.541342	187.846	1	8
chr1	155900000	155970000	ARHGEF2	NM_001162384.2	chr1	155943487	155955236	chr1	155960300	155961977	52	347	641	0.541342	187.846	1	3
chr1	155900000	155970000	ARHGEF2	NM_001350110.2	chr1	155943487	155955236	chr1	155960300	155961977	52	347	641	0.541342	187.846	1	3
chr1	155900000	155970000	ARHGEF2	NM_001350110.2	chr1	155939807	155941614	chr1	155943487	155955236	75	347	641	0.541342	187.846	1	2
chr1	155900000	155970000	ARHGEF2	NM_001350110.2	chr1	155943487	155955236	chr1	155958552	155959968	28	347	641	0.541342	187.846	1	5
chr1	155900000	155970000	ARHGEF2	NM_001350110.2	chr1	155930170	155933104	chr1	155943487	155955236	107	347	641	0.541342	187.846	1	1
chr1	155900000	155970000	ARHGEF2	NM_001350110.2	chr1	155900752	155902678	chr1	155943487	155955236	16	347	641	0.541342	187.846	1	7
chr1	155900000	155970000	ARHGEF2	NM_001350110.2	chr1	155907556	155908677	chr1	155943487	155955236	26	347	641	0.541342	187.846	1	6
chr1	155900000	155970000	ARHGEF2	NM_001350110.2	chr1	155924583	155925840	chr1	155943487	155955236	32	347	641	0.541342	187.846	1	4
chr1	155900000	155970000	ARHGEF2	NM_001350110.2	chr1	155926398	155928783	chr1	155943487	155955236	11	347	641	0.541342	187.846	1	8
chr1	155900000	155970000	ARHGEF2	NM_001350111.2	chr1	155907556	155908677	chr1	155943487	155955236	26	347	641	0.541342	187.846	1	6
chr1	155900000	155970000	ARHGEF2	NM_001350111.2	chr1	155924583	155925840	chr1	155943487	155955236	32	347	641	0.541342	187.846	1	4
chr1	155900000	155970000	ARHGEF2	NM_001350111.2	chr1	155926398	155928783	chr1	155943487	155955236	11	347	641	0.541342	187.846	1	8
chr1	155900000	155970000	ARHGEF2	NM_001350111.2	chr1	155943487	155955236	chr1	155960300	155961977	52	347	641	0.541342	187.846	1	3
chr1	155900000	155970000	ARHGEF2	NM_001350111.2	chr1	155900752	155902678	chr1	155943487	155955236	16	347	641	0.541342	187.846	1	7
chr1	155900000	155970000	ARHGEF2	NM_001350111.2	chr1	155930170	155933104	chr1	155943487	155955236	107	347	641	0.541342	187.846	1	1
chr1	155900000	155970000	ARHGEF2	NM_001350111.2	chr1	155943487	155955236	chr1	155958552	155959968	28	347	641	0.541342	187.846	1	5
chr1	155900000	155970000	ARHGEF2	NM_001350111.2	chr1	155939807	155941614	chr1	155943487	155955236	75	347	641	0.541342	187.846	1	2
chr1	155900000	155970000	ARHGEF2	NM_001350112.2	chr1	155943487	155955236	chr1	155958552	155959968	28	347	641	0.541342	187.846	1	5
chr1	155900000	155970000	ARHGEF2	NM_001350112.2	chr1	155930170	155933104	chr1	155943487	155955236	107	347	641	0.541342	187.846	1	1
chr1	155900000	155970000	ARHGEF2	NM_001350112.2	chr1	155900752	155902678	chr1	155943487	155955236	16	347	641	0.541342	187.846	1	7
chr1	155900000	155970000	ARHGEF2	NM_001350112.2	chr1	155926398	155928783	chr1	155943487	155955236	11	347	641	0.541342	187.846	1	8
chr1	155900000	155970000	ARHGEF2	NM_001350112.2	chr1	155924583	155925840	chr1	155943487	155955236	32	347	641	0.541342	187.846	1	4
chr1	155900000	155970000	ARHGEF2	NM_001350112.2	chr1	155939807	155941614	chr1	155943487	155955236	75	347	641	0.541342	187.846	1	2
chr1	155900000	155970000	ARHGEF2	NM_001350112.2	chr1	155943487	155955236	chr1	155960300	155961977	52	347	641	0.541342	187.846	1	3
chr1	155900000	155970000	ARHGEF2	NM_001350112.2	chr1	155907556	155908677	chr1	155943487	155955236	26	347	641	0.541342	187.846	1	6
chr1	155900000	155970000	ARHGEF2	NM_004723.4	chr1	155900752	155902678	chr1	155943487	155955236	16	347	641	0.541342	187.846	1	7
chr1	155900000	155970000	ARHGEF2	NM_004723.4	chr1	155943487	155955236	chr1	155958552	155959968	28	347	641	0.541342	187.846	1	5
chr1	155900000	155970000	ARHGEF2	NM_004723.4	chr1	155943487	155955236	chr1	155960300	155961977	52	347	641	0.541342	187.846	1	3
chr1	155900000	155970000	ARHGEF2	NM_004723.4	chr1	155939807	155941614	chr1	155943487	155955236	75	347	641	0.541342	187.846	1	2
chr1	155900000	155970000	ARHGEF2	NM_004723.4	chr1	155907556	155908677	chr1	155943487	155955236	26	347	641	0.541342	187.846	1	6
chr1	155900000	155970000	ARHGEF2	NM_004723.4	chr1	155930170	155933104	chr1	155943487	155955236	107	347	641	0.541342	187.846	1	1
chr1	155900000	155970000	ARHGEF2	NM_004723.4	chr1	155926398	155928783	chr1	155943487	155955236	11	347	641	0.541342	187.846	1	8
chr1	155900000	155970000	ARHGEF2	NM_004723.4	chr1	155924583	155925840	chr1	155943487	155955236	32	347	641	0.541342	187.846	1	4
chr1	234650000	234790000	ARID4B	NM_001206794.2	chr1	234651030	234652420	chr1	235488183	235495898	3	16	280	0.0571429	0.914286	5	2
chr1	234650000	234790000	ARID4B	NM_001206794.2	chr1	234664999	234672711	chr1	235488183	235495898	4	16	280	0.0571429	0.914286	5	1
chr1	234650000	234790000	ARID4B	NM_001206794.2	chr1	234673583	234681578	chr1	235488183	235495898	3	16	280	0.0571429	0.914286	5	2
chr1	234650000	234790000	ARID4B	NM_001206794.2	chr1	234694707	234696317	chr1	235488183	235495898	3	16	280	0.0571429	0.914286	5	2
chr1	234650000	234790000	ARID4B	NM_001206794.2	chr1	234788676	234798375	chr1	235488183	235495898	3	16	280	0.0571429	0.914286	5	2
chr1	234650000	234790000	ARID4B	NM_016374.6	chr1	234694707	234696317	chr1	235488183	235495898	3	16	280	0.0571429	0.914286	5	2
chr1	234650000	234790000	ARID4B	NM_016374.6	chr1	234651030	234652420	chr1	235488183	235495898	3	16	280	0.0571429	0.914286	5	2
chr1	234650000	234790000	ARID4B	NM_016374.6	chr1	234664999	234672711	chr1	235488183	235495898	4	16	280	0.0571429	0.914286	5	1
chr1	234650000	234790000	ARID4B	NM_016374.6	chr1	234673583	234681578	chr1	235488183	235495898	3	16	280	0.0571429	0.914286	5	2
chr1	234650000	234790000	ARID4B	NM_016374.6	chr1	234788676	234798375	chr1	235488183	235495898	3	16	280	0.0571429	0.914286	5	2
chr1	234650000	234790000	ARID4B	NM_031371.4	chr1	234664999	234672711	chr1	235488183	235495898	4	16	280	0.0571429	0.914286	5	1
chr1	234650000	234790000	ARID4B	NM_031371.4	chr1	234673583	234681578	chr1	235488183	235495898	3	16	280	0.0571429	0.914286	5	2
chr1	234650000	234790000	ARID4B	NM_031371.4	chr1	234651030	234652420	chr1	235488183	235495898	3	16	280	0.0571429	0.914286	5	2
chr1	234650000	234790000	ARID4B	NM_031371.4	chr1	234694707	234696317	chr1	235488183	235495898	3	16	280	0.0571429	0.914286	5	2
chr1	234650000	234790000	ARID4B	NM_031371.4	chr1	234788676	234798375	chr1	235488183	235495898	3	16	280	0.0571429	0.914286	5	2
chr1	235120000	235300000	ARID4B	NM_001206794.2	chr1	235130978	235135358	chr1	235488183	235495898	7	18	280	0.0642857	1.15714	5	1
chr1	235120000	235300000	ARID4B	NM_001206794.2	chr1	235256030	235257814	chr1	235488183	235495898	5	18	280	0.0642857	1.15714	5	3
chr1	235120000	235300000	ARID4B	NM_001206794.2	chr1	235264655	235269604	chr1	235488183	235495898	6	18	280	0.0642857	1.15714	5	2
chr1	235120000	235300000	ARID4B	NM_016374.6	chr1	235130978	235135358	chr1	235488183	235495898	7	18	280	0.0642857	1.15714	5	1
chr1	235120000	235300000	ARID4B	NM_016374.6	chr1	235256030	235257814	chr1	235488183	235495898	5	18	280	0.0642857	1.15714	5	3
chr1	235120000	235300000	ARID4B	NM_016374.6	chr1	235264655	235269604	chr1	235488183	235495898	6	18	280	0.0642857	1.15714	5	2
chr1	235120000	235300000	ARID4B	NM_031371.4	chr1	235130978	235135358	chr1	235488183	235495898	7	18	280	0.0642857	1.15714	5	1
chr1	235120000	235300000	ARID4B	NM_031371.4	chr1	235264655	235269604	chr1	235488183	235495898	6	18	280	0.0642857	1.15714	5	2
chr1	235120000	235300000	ARID4B	NM_031371.4	chr1	235256030	235257814	chr1	235488183	235495898	5	18	280	0.0642857	1.15714	5	3
chr17	37435000	38350000	ARL5C	NM_001143968.1	chr17	37315787	37324182	chr17	37432275	37441394	3	3	43	0.0697674	0.209302	11	1
chr3	4735000	4805000	ARL8B	NM_018184.3	chr3	4750778	4767098	chr3	5163270	5165791	17	26	47	0.553191	14.383	2	1
chr3	4735000	4805000	ARL8B	NM_018184.3	chr3	4769859	4779577	chr3	5163270	5165791	5	26	47	0.553191	14.383	2	2
chr3	4735000	4805000	ARL8B	NM_018184.3	chr3	4781983	4787102	chr3	5163270	5165791	4	26	47	0.553191	14.383	2	3
chr6	151905000	151995000	ARMT1	NM_001286562.2	chr6	151771023	151775681	chr6	151936610	151938712	3	23	153	0.150327	3.45752	4	4
chr6	151905000	151995000	ARMT1	NM_001286562.2	chr6	151771023	151775681	chr6	151953264	151955908	9	23	153	0.150327	3.45752	4	1
chr6	151905000	151995000	ARMT1	NM_001286562.2	chr6	151771023	151775681	chr6	151978670	151983985	6	23	153	0.150327	3.45752	4	2
chr6	151905000	151995000	ARMT1	NM_001286562.2	chr6	151771023	151775681	chr6	151985144	151990708	5	23	153	0.150327	3.45752	4	3
chr6	151905000	151995000	ARMT1	NM_024573.3	chr6	151771023	151775681	chr6	151936610	151938712	3	23	153	0.150327	3.45752	4	4
chr6	151905000	151995000	ARMT1	NM_024573.3	chr6	151771023	151775681	chr6	151953264	151955908	9	23	153	0.150327	3.45752	4	1
chr6	151905000	151995000	ARMT1	NM_024573.3	chr6	151771023	151775681	chr6	151978670	151983985	6	23	153	0.150327	3.45752	4	2
chr6	151905000	151995000	ARMT1	NM_024573.3	chr6	151771023	151775681	chr6	151985144	151990708	5	23	153	0.150327	3.45752	4	3
chr10	5580000	5615000	ASB13	NM_024701.4	chr10	5585923	5594543	chr10	5705508	5711650	11	11	43	0.255814	2.81395	7	1
chr10	5670000	5735000	ASB13	NM_024701.4	chr10	5700589	5702628	chr10	5705508	5711650	16	26	43	0.604651	15.7209	1	1
chr10	5670000	5735000	ASB13	NM_024701.4	chr10	5686731	5694939	chr10	5705508	5711650	10	26	43	0.604651	15.7209	1	2
chr1	155040000	155155000	ASH1L	NM_001366177.2	chr1	155063372	155068587	chr1	155531650	155534688	3	3	143	0.020979	0.0629371	18	1
chr1	155040000	155155000	ASH1L	NM_018489.3	chr1	155063372	155068587	chr1	155531650	155534688	3	3	143	0.020979	0.0629371	18	1
chr11	72895000	72925000	ATG16L2	NM_001318766.2	chr11	72522943	72528343	chr11	72895579	72899778	3	18	158	0.113924	2.05063	6	3
chr11	72895000	72925000	ATG16L2	NM_001318766.2	chr11	72522943	72528343	chr11	72900568	72909187	11	18	158	0.113924	2.05063	6	1
chr11	72895000	72925000	ATG16L2	NM_001318766.2	chr11	72522943	72528343	chr11	72910449	72913986	4	18	158	0.113924	2.05063	6	2
chr11	72895000	72925000	ATG16L2	NM_033388.2	chr11	72522943	72528343	chr11	72895579	72899778	3	18	158	0.113924	2.05063	6	3
chr11	72895000	72925000	ATG16L2	NM_033388.2	chr11	72522943	72528343	chr11	72900568	72909187	11	18	158	0.113924	2.05063	6	1
chr11	72895000	72925000	ATG16L2	NM_033388.2	chr11	72522943	72528343	chr11	72910449	72913986	4	18	158	0.113924	2.05063	6	2
chr10	9050000	9230000	ATP5F1C	NM_001001973.3	chr10	7828683	7831717	chr10	9227901	9231137	3	3	31	0.0967742	0.290323	2	1
chr10	9050000	9230000	ATP5F1C	NM_001320886.2	chr10	7828683	7831717	chr10	9227901	9231137	3	3	31	0.0967742	0.290323	2	1
chr10	9050000	9230000	ATP5F1C	NM_005174.4	chr10	7828683	7831717	chr10	9227901	9231137	3	3	31	0.0967742	0.290323	2	1
chr14	105280000	105300000	ATP5MPL	NM_001127393.2	chr14	104386871	104388501	chr14	105285460	105288208	3	3	29	0.103448	0.310345	5	1
chr14	105280000	105300000	ATP5MPL	NM_004894.3	chr14	104386871	104388501	chr14	105285460	105288208	3	3	29	0.103448	0.310345	5	1
chr1	1215000	1460000	AURKAIP1	NM_001127229.2	chr1	1299220	1300367	chr1	1309478	1312976	21	21	24	0.875	18.375	4	1
chr1	1215000	1460000	AURKAIP1	NM_001127230.2	chr1	1299220	1300367	chr1	1309478	1312976	21	21	24	0.875	18.375	4	1
chr1	1215000	1460000	AURKAIP1	NM_017900.3	chr1	1299220	1300367	chr1	1309478	1312976	21	21	24	0.875	18.375	4	1
chr7	68965000	69180000	AUTS2	NM_001127231.3	chr7	69014317	69016817	chr7	69061631	69069931	7	16	52	0.307692	4.92308	1	2
chr7	68965000	69180000	AUTS2	NM_001127231.3	chr7	69061631	69069931	chr7	69115933	69121077	9	16	52	0.307692	4.92308	1	1
chr7	68965000	69180000	AUTS2	NM_001127232.3	chr7	69014317	69016817	chr7	69061631	69069931	7	16	52	0.307692	4.92308	1	2
chr7	68965000	69180000	AUTS2	NM_001127232.3	chr7	69061631	69069931	chr7	69115933	69121077	9	16	52	0.307692	4.92308	1	1
chr7	68965000	69180000	AUTS2	NM_015570.4	chr7	69014317	69016817	chr7	69061631	69069931	7	16	52	0.307692	4.92308	1	2
chr7	68965000	69180000	AUTS2	NM_015570.4	chr7	69061631	69069931	chr7	69115933	69121077	9	16	52	0.307692	4.92308	1	1
chr1	234650000	234790000	B3GALNT2	NM_001277155.3	chr1	234788676	234798375	chr1	235665807	235669173	4	4	109	0.0366972	0.146789	7	1
chr1	234650000	234790000	B3GALNT2	NM_152490.5	chr1	234788676	234798375	chr1	235665807	235669173	4	4	109	0.0366972	0.146789	7	1
chr1	235120000	235300000	B3GALNT2	NM_001277155.3	chr1	235252464	235254734	chr1	235665807	235669173	6	13	109	0.119266	1.55046	4	2
chr1	235120000	235300000	B3GALNT2	NM_001277155.3	chr1	235264655	235269604	chr1	235665807	235669173	7	13	109	0.119266	1.55046	4	1
chr1	235120000	235300000	B3GALNT2	NM_152490.5	chr1	235252464	235254734	chr1	235665807	235669173	6	13	109	0.119266	1.55046	4	2
chr1	235120000	235300000	B3GALNT2	NM_152490.5	chr1	235264655	235269604	chr1	235665807	235669173	7	13	109	0.119266	1.55046	4	1
chr1	1180000	1200000	B3GALT6	NM_080605.4	chr1	1165102	1168929	chr1	1185124	1187103	8	8	87	0.091954	0.735632	2	1
chr1	1215000	1460000	B3GALT6	NM_080605.4	chr1	1165102	1168929	chr1	1235267	1236742	6	6	87	0.0689655	0.413793	8	1
chr19	17315000	17350000	BABAM1	NM_001033549.3	chr19	17345318	17348456	chr19	17375020	17380222	10	10	66	0.151515	1.51515	6	1
chr19	17315000	17350000	BABAM1	NM_001288756.2	chr19	17345318	17348456	chr19	17375020	17380222	10	10	66	0.151515	1.51515	6	1
chr19	17315000	17350000	BABAM1	NM_001288757.2	chr19	17345318	17348456	chr19	17375020	17380222	10	10	66	0.151515	1.51515	6	1
chr19	17315000	17350000	BABAM1	NM_014173.4	chr19	17345318	17348456	chr19	17375020	17380222	10	10	66	0.151515	1.51515	6	1
chr19	17395000	17455000	BABAM1	NM_001033549.3	chr19	17375020	17380222	chr19	17399998	17407884	34	34	66	0.515152	17.5152	4	1
chr19	17395000	17455000	BABAM1	NM_001288756.2	chr19	17375020	17380222	chr19	17399998	17407884	34	34	66	0.515152	17.5152	4	1
chr19	17395000	17455000	BABAM1	NM_001288757.2	chr19	17375020	17380222	chr19	17399998	17407884	34	34	66	0.515152	17.5152	4	1
chr19	17395000	17455000	BABAM1	NM_014173.4	chr19	17375020	17380222	chr19	17399998	17407884	34	34	66	0.515152	17.5152	4	1
chr11	65270000	65290000	BANF1	NM_001143985.1	chr11	65263078	65280458	chr11	65768893	65771593	3	3	69	0.0434783	0.130435	20	1
chr11	65270000	65290000	BANF1	NM_003860.4	chr11	65263078	65280458	chr11	65768893	65771593	3	3	69	0.0434783	0.130435	20	1
chr14	35820000	35895000	BAZ1A	NM_013448.3	chr14	35341578	35344759	chr14	35885138	35886964	3	3	53	0.0566038	0.169811	4	1
chr14	35820000	35895000	BAZ1A	NM_182648.2	chr14	35341578	35344759	chr14	35885138	35886964	3	3	53	0.0566038	0.169811	4	1
chr3	4735000	4805000	BHLHE40	NM_003670.3	chr3	4735754	4738405	chr3	5017360	5032929	5	558	1174	0.475298	265.216	1	9
chr3	4735000	4805000	BHLHE40	NM_003670.3	chr3	4742595	4744022	chr3	5017360	5032929	11	558	1174	0.475298	265.216	1	8
chr3	4735000	4805000	BHLHE40	NM_003670.3	chr3	4744451	4745872	chr3	5017360	5032929	11	558	1174	0.475298	265.216	1	8
chr3	4735000	4805000	BHLHE40	NM_003670.3	chr3	4750778	4767098	chr3	5017360	5032929	337	558	1174	0.475298	265.216	1	1
chr3	4735000	4805000	BHLHE40	NM_003670.3	chr3	4769859	4779577	chr3	5017360	5032929	51	558	1174	0.475298	265.216	1	2
chr3	4735000	4805000	BHLHE40	NM_003670.3	chr3	4781983	4787102	chr3	5017360	5032929	46	558	1174	0.475298	265.216	1	3
chr3	4735000	4805000	BHLHE40	NM_003670.3	chr3	4787821	4788968	chr3	5017360	5032929	17	558	1174	0.475298	265.216	1	6
chr3	4735000	4805000	BHLHE40	NM_003670.3	chr3	4790046	4794949	chr3	5017360	5032929	43	558	1174	0.475298	265.216	1	4
chr3	4735000	4805000	BHLHE40	NM_003670.3	chr3	4796933	4800483	chr3	5017360	5032929	21	558	1174	0.475298	265.216	1	5
chr3	4735000	4805000	BHLHE40	NM_003670.3	chr3	4800975	4806003	chr3	5017360	5032929	16	558	1174	0.475298	265.216	1	7
chr11	102280000	102395000	BIRC2	NM_001166.4	chr11	102215888	102219395	chr11	102337737	102343372	4	11	22	0.5	5.5	2	1
chr11	102280000	102395000	BIRC2	NM_001166.4	chr11	102215888	102219395	chr11	102354464	102356902	3	11	22	0.5	5.5	2	2
chr11	102280000	102395000	BIRC2	NM_001166.4	chr11	102215888	102219395	chr11	102364405	102367377	4	11	22	0.5	5.5	2	1
chr11	102280000	102395000	BIRC2	NM_001256163.1	chr11	102215888	102219395	chr11	102337737	102343372	4	11	22	0.5	5.5	2	1
chr11	102280000	102395000	BIRC2	NM_001256163.1	chr11	102215888	102219395	chr11	102354464	102356902	3	11	22	0.5	5.5	2	2
chr11	102280000	102395000	BIRC2	NM_001256163.1	chr11	102215888	102219395	chr11	102364405	102367377	4	11	22	0.5	5.5	2	1
chr11	102280000	102395000	BIRC2	NM_001256166.2	chr11	102215888	102219395	chr11	102337737	102343372	4	11	22	0.5	5.5	2	1
chr11	102280000	102395000	BIRC2	NM_001256166.2	chr11	102215888	102219395	chr11	102354464	102356902	3	11	22	0.5	5.5	2	2
chr11	102280000	102395000	BIRC2	NM_001256166.2	chr11	102215888	102219395	chr11	102364405	102367377	4	11	22	0.5	5.5	2	1
chr19	17395000	17455000	BST2	NM_004335.4	chr19	17425652	17434402	chr19	17513565	17518951	9	27	50	0.54	14.58	5	2
chr19	17395000	17455000	BST2	NM_004335.4	chr19	17434812	17442518	chr19	17513565	17518951	7	27	50	0.54	14.58	5	3
chr19	17395000	17455000	BST2	NM_004335.4	chr19	17399998	17407884	chr19	17513565	17518951	11	27	50	0.54	14.58	5	1
chr12	14940000	15170000	C12orf60	NM_175874.4	chr12	14954789	14957645	chr12	14997836	15000607	7	17	32	0.53125	9.03125	7	2
chr12	14940000	15170000	C12orf60	NM_175874.4	chr12	14954789	14957645	chr12	15053119	15060224	10	17	32	0.53125	9.03125	7	1
chr19	12960000	13275000	C19orf53	NM_014047.3	chr19	13142379	13151235	chr19	13882621	13901860	3	8	473	0.0169133	0.135307	18	2
chr19	12960000	13275000	C19orf53	NM_014047.3	chr19	13270927	13276769	chr19	13882621	13901860	5	8	473	0.0169133	0.135307	18	1
chr19	12960000	13275000	C19orf67	NM_001277378.2	chr19	13270927	13276769	chr19	14187832	14197524	9	9	100	0.09	0.81	16	1
chr2	85770000	85865000	C2orf68	NM_001013649.4	chr2	85815304	85821080	chr2	85834357	85840021	88	115	145	0.793103	91.2069	2	1
chr2	85770000	85865000	C2orf68	NM_001013649.4	chr2	85772489	85780109	chr2	85834357	85840021	16	115	145	0.793103	91.2069	2	2
chr2	85770000	85865000	C2orf68	NM_001013649.4	chr2	85834357	85840021	chr2	85846131	85848143	11	115	145	0.793103	91.2069	2	3
chr10	5580000	5615000	CALML3	NM_005185.4	chr10	5566260	5571261	chr10	5585923	5594543	53	79	121	0.652893	51.5785	1	1
chr10	5580000	5615000	CALML3	NM_005185.4	chr10	5566260	5571261	chr10	5594844	5598238	10	79	121	0.652893	51.5785	1	3
chr10	5580000	5615000	CALML3	NM_005185.4	chr10	5566260	5571261	chr10	5580099	5581640	16	79	121	0.652893	51.5785	1	2
chr10	5580000	5615000	CALML5	NM_017422.5	chr10	5537110	5547517	chr10	5594844	5598238	26	178	615	0.289431	51.5187	2	2
chr10	5580000	5615000	CALML5	NM_017422.5	chr10	5537110	5547517	chr10	5601255	5602515	7	178	615	0.289431	51.5187	2	4
chr10	5580000	5615000	CALML5	NM_017422.5	chr10	5537110	5547517	chr10	5580099	5581640	17	178	615	0.289431	51.5187	2	3
chr10	5580000	5615000	CALML5	NM_017422.5	chr10	5537110	5547517	chr10	5585923	5594543	128	178	615	0.289431	51.5187	2	1
chr10	5670000	5735000	CALML5	NM_017422.5	chr10	5537110	5547517	chr10	5669951	5672466	7	28	615	0.0455285	1.2748	3	3
chr10	5670000	5735000	CALML5	NM_017422.5	chr10	5537110	5547517	chr10	5673519	5675971	9	28	615	0.0455285	1.2748	3	1
chr10	5670000	5735000	CALML5	NM_017422.5	chr10	5537110	5547517	chr10	5686731	5694939	8	28	615	0.0455285	1.2748	3	2
chr10	5670000	5735000	CALML5	NM_017422.5	chr10	5537110	5547517	chr10	5697986	5699608	4	28	615	0.0455285	1.2748	3	4
chr19	12960000	13275000	CALR	NM_004343.4	chr19	12975158	12980310	chr19	13040830	13068614	17	429	507	0.846154	363	2	8
chr19	12960000	13275000	CALR	NM_004343.4	chr19	12980787	12982198	chr19	13040830	13068614	7	429	507	0.846154	363	2	14
chr19	12960000	13275000	CALR	NM_004343.4	chr19	12982805	12986445	chr19	13040830	13068614	7	429	507	0.846154	363	2	14
chr19	12960000	13275000	CALR	NM_004343.4	chr19	13003938	13005229	chr19	13040830	13068614	13	429	507	0.846154	363	2	10
chr19	12960000	13275000	CALR	NM_004343.4	chr19	13034663	13035985	chr19	13040830	13068614	22	429	507	0.846154	363	2	5
chr19	12960000	13275000	CALR	NM_004343.4	chr19	13039070	13040386	chr19	13040830	13068614	28	429	507	0.846154	363	2	4
chr19	12960000	13275000	CALR	NM_004343.4	chr19	13040830	13068614	chr19	13070974	13072174	9	429	507	0.846154	363	2	12
chr19	12960000	13275000	CALR	NM_004343.4	chr19	13040830	13068614	chr19	13073250	13074338	16	429	507	0.846154	363	2	9
chr19	12960000	13275000	CALR	NM_004343.4	chr19	13040830	13068614	chr19	13074978	13079094	129	429	507	0.846154	363	2	1
chr19	12960000	13275000	CALR	NM_004343.4	chr19	13040830	13068614	chr19	13088315	13090347	7	429	507	0.846154	363	2	14
chr19	12960000	13275000	CALR	NM_004343.4	chr19	13040830	13068614	chr19	13091954	13098446	19	429	507	0.846154	363	2	7
chr19	12960000	13275000	CALR	NM_004343.4	chr19	13040830	13068614	chr19	13142379	13151235	20	429	507	0.846154	363	2	6
chr19	12960000	13275000	CALR	NM_004343.4	chr19	13040830	13068614	chr19	13154714	13159662	7	429	507	0.846154	363	2	14
chr19	12960000	13275000	CALR	NM_004343.4	chr19	13040830	13068614	chr19	13160643	13177345	30	429	507	0.846154	363	2	3
chr19	12960000	13275000	CALR	NM_004343.4	chr19	13040830	13068614	chr19	13181295	13191176	19	429	507	0.846154	363	2	7
chr19	12960000	13275000	CALR	NM_004343.4	chr19	13040830	13068614	chr19	13217538	13219024	4	429	507	0.846154	363	2	16
chr19	12960000	13275000	CALR	NM_004343.4	chr19	13040830	13068614	chr19	13219661	13221960	8	429	507	0.846154	363	2	13
chr19	12960000	13275000	CALR	NM_004343.4	chr19	13040830	13068614	chr19	13238866	13240993	6	429	507	0.846154	363	2	15
chr19	12960000	13275000	CALR	NM_004343.4	chr19	13040830	13068614	chr19	13242912	13244011	7	429	507	0.846154	363	2	14
chr19	12960000	13275000	CALR	NM_004343.4	chr19	13040830	13068614	chr19	13244972	13246260	4	429	507	0.846154	363	2	16
chr19	12960000	13275000	CALR	NM_004343.4	chr19	13040830	13068614	chr19	13253568	13255662	10	429	507	0.846154	363	2	11
chr19	12960000	13275000	CALR	NM_004343.4	chr19	13040830	13068614	chr19	13270927	13276769	40	429	507	0.846154	363	2	2
chr2	85770000	85865000	CAPG	NM_001256139.2	chr2	85639411	85643037	chr2	85815304	85821080	13	25	77	0.324675	8.11688	9	1
chr2	85770000	85865000	CAPG	NM_001256139.2	chr2	85639411	85643037	chr2	85772489	85780109	12	25	77	0.324675	8.11688	9	2
chr11	65270000	65290000	CAPN1	NM_001198868.2	chr11	64947259	64951780	chr11	65263078	65280458	4	4	110	0.0363636	0.145455	18	1
chr11	65270000	65290000	CAPN1	NM_001198869.2	chr11	64947259	64951780	chr11	65263078	65280458	4	4	110	0.0363636	0.145455	18	1
chr11	65270000	65290000	CAPN1	NM_005186.4	chr11	64947259	64951780	chr11	65263078	65280458	4	4	110	0.0363636	0.145455	18	1
chr7	26215000	26225000	CBX3	NM_007276.5	chr7	26215904	26221410	chr7	26236444	26245660	42	204	615	0.331707	67.6683	1	2
chr7	26215000	26225000	CBX3	NM_007276.5	chr7	26222019	26229674	chr7	26236444	26245660	162	204	615	0.331707	67.6683	1	1
chr7	26215000	26225000	CBX3	NM_016587.4	chr7	26215904	26221410	chr7	26236444	26245660	42	204	615	0.331707	67.6683	1	2
chr7	26215000	26225000	CBX3	NM_016587.4	chr7	26222019	26229674	chr7	26236444	26245660	162	204	615	0.331707	67.6683	1	1
chr19	12960000	13275000	CCDC130	NM_001320561.2	chr19	13270927	13276769	chr19	13839907	13846642	8	8	47	0.170213	1.3617	14	1
chr19	12960000	13275000	CCDC130	NM_001320564.2	chr19	13270927	13276769	chr19	13839907	13846642	8	8	47	0.170213	1.3617	14	1
chr19	12960000	13275000	CCDC130	NM_001320565.2	chr19	13270927	13276769	chr19	13839907	13846642	8	8	47	0.170213	1.3617	14	1
chr19	12960000	13275000	CCDC130	NM_001320566.2	chr19	13270927	13276769	chr19	13839907	13846642	8	8	47	0.170213	1.3617	14	1
chr19	12960000	13275000	CCDC130	NM_001320567.2	chr19	13270927	13276769	chr19	13839907	13846642	8	8	47	0.170213	1.3617	14	1
chr19	12960000	13275000	CCDC130	NM_001320568.2	chr19	13270927	13276769	chr19	13856841	13862179	5	5	63	0.0793651	0.396825	17	2
chr19	12960000	13275000	CCDC130	NM_001320569.2	chr19	13270927	13276769	chr19	13856841	13862179	5	5	63	0.0793651	0.396825	17	2
chr19	12960000	13275000	CCDC130	NM_030818.4	chr19	13270927	13276769	chr19	13856841	13862179	5	5	63	0.0793651	0.396825	17	2
chr6	151905000	151995000	CCDC170	NM_025059.4	chr6	151813713	151816694	chr6	151953264	151955908	4	4	4	1	4	3	1
chr14	100590000	100655000	CCDC85C	NM_001144995.2	chr14	100067272	100071984	chr14	100603116	100624374	3	3	140	0.0214286	0.0642857	6	1
chr12	69080000	69280000	CCT2	NM_001198842.2	chr12	69191695	69196743	chr12	69973424	69980358	3	3	199	0.0150754	0.0452261	5	1
chr12	69080000	69280000	CCT2	NM_006431.3	chr12	69191695	69196743	chr12	69973424	69980358	3	3	199	0.0150754	0.0452261	5	1
chr11	34460000	34945000	CD44	NM_000610.4	chr11	34674138	34679111	chr11	35159506	35168516	3	3	87	0.0344828	0.103448	6	1
chr11	34460000	34945000	CD44	NM_001001389.2	chr11	34674138	34679111	chr11	35159506	35168516	3	3	87	0.0344828	0.103448	6	1
chr11	34460000	34945000	CD44	NM_001001390.2	chr11	34674138	34679111	chr11	35159506	35168516	3	3	87	0.0344828	0.103448	6	1
chr11	34460000	34945000	CD44	NM_001001391.2	chr11	34674138	34679111	chr11	35159506	35168516	3	3	87	0.0344828	0.103448	6	1
chr11	34460000	34945000	CD44	NM_001001392.2	chr11	34674138	34679111	chr11	35159506	35168516	3	3	87	0.0344828	0.103448	6	1
chr11	34460000	34945000	CD44	NM_001202555.2	chr11	34674138	34679111	chr11	35159506	35168516	3	3	87	0.0344828	0.103448	6	1
chr11	34460000	34945000	CD44	NM_001202556.2	chr11	34674138	34679111	chr11	35159506	35168516	3	3	87	0.0344828	0.103448	6	1
chr11	34460000	34945000	CD44	NM_001202557.2	chr11	34674138	34679111	chr11	35159506	35168516	3	3	87	0.0344828	0.103448	6	1
chr11	65270000	65290000	CDC42BPG	NM_017525.3	chr11	64608700	64613452	chr11	65263078	65280458	3	3	154	0.0194805	0.0584416	22	1
chr11	65270000	65290000	CDC42EP2	NM_006779.4	chr11	65081518	65085629	chr11	65263078	65280458	14	14	84	0.166667	2.33333	5	1
chr17	37435000	38350000	CDC6	NM_001254.4	chr17	38306050	38315901	chr17	38439066	38448957	7	22	200	0.11	2.42	6	2
chr17	37435000	38350000	CDC6	NM_001254.4	chr17	38343925	38352420	chr17	38439066	38448957	15	22	200	0.11	2.42	6	1
chr17	37435000	38350000	CDK12	NM_015083.4	chr17	37432275	37441394	chr17	37600899	37646162	10	341	413	0.825666	281.552	1	7
chr17	37435000	38350000	CDK12	NM_015083.4	chr17	37444457	37447451	chr17	37600899	37646162	5	341	413	0.825666	281.552	1	9
chr17	37435000	38350000	CDK12	NM_015083.4	chr17	37459227	37465055	chr17	37600899	37646162	12	341	413	0.825666	281.552	1	6
chr17	37435000	38350000	CDK12	NM_015083.4	chr17	37470125	37473720	chr17	37600899	37646162	5	341	413	0.825666	281.552	1	9
chr17	37435000	38350000	CDK12	NM_015083.4	chr17	37480780	37494777	chr17	37600899	37646162	16	341	413	0.825666	281.552	1	3
chr17	37435000	38350000	CDK12	NM_015083.4	chr17	37495195	37496412	chr17	37600899	37646162	7	341	413	0.825666	281.552	1	8
chr17	37435000	38350000	CDK12	NM_015083.4	chr17	37496720	37500814	chr17	37600899	37646162	4	341	413	0.825666	281.552	1	10
chr17	37435000	38350000	CDK12	NM_015083.4	chr17	37507814	37511422	chr17	37600899	37646162	5	341	413	0.825666	281.552	1	9
chr17	37435000	38350000	CDK12	NM_015083.4	chr17	37512244	37525129	chr17	37600899	37646162	14	341	413	0.825666	281.552	1	4
chr17	37435000	38350000	CDK12	NM_015083.4	chr17	37527421	37539649	chr17	37600899	37646162	28	341	413	0.825666	281.552	1	2
chr17	37435000	38350000	CDK12	NM_015083.4	chr17	37584997	37600537	chr17	37600899	37646162	214	341	413	0.825666	281.552	1	1
chr17	37435000	38350000	CDK12	NM_015083.4	chr17	37600899	37646162	chr17	37953913	37959829	3	341	413	0.825666	281.552	1	11
chr17	37435000	38350000	CDK12	NM_015083.4	chr17	37600899	37646162	chr17	37961166	37978649	13	341	413	0.825666	281.552	1	5
chr17	37435000	38350000	CDK12	NM_015083.4	chr17	37600899	37646162	chr17	38000098	38005687	5	341	413	0.825666	281.552	1	9
chr17	37435000	38350000	CDK12	NM_016507.4	chr17	37432275	37441394	chr17	37600899	37646162	10	341	413	0.825666	281.552	1	7
chr17	37435000	38350000	CDK12	NM_016507.4	chr17	37444457	37447451	chr17	37600899	37646162	5	341	413	0.825666	281.552	1	9
chr17	37435000	38350000	CDK12	NM_016507.4	chr17	37459227	37465055	chr17	37600899	37646162	12	341	413	0.825666	281.552	1	6
chr17	37435000	38350000	CDK12	NM_016507.4	chr17	37470125	37473720	chr17	37600899	37646162	5	341	413	0.825666	281.552	1	9
chr17	37435000	38350000	CDK12	NM_016507.4	chr17	37480780	37494777	chr17	37600899	37646162	16	341	413	0.825666	281.552	1	3
chr17	37435000	38350000	CDK12	NM_016507.4	chr17	37495195	37496412	chr17	37600899	37646162	7	341	413	0.825666	281.552	1	8
chr17	37435000	38350000	CDK12	NM_016507.4	chr17	37496720	37500814	chr17	37600899	37646162	4	341	413	0.825666	281.552	1	10
chr17	37435000	38350000	CDK12	NM_016507.4	chr17	37507814	37511422	chr17	37600899	37646162	5	341	413	0.825666	281.552	1	9
chr17	37435000	38350000	CDK12	NM_016507.4	chr17	37512244	37525129	chr17	37600899	37646162	14	341	413	0.825666	281.552	1	4
chr17	37435000	38350000	CDK12	NM_016507.4	chr17	37527421	37539649	chr17	37600899	37646162	28	341	413	0.825666	281.552	1	2
chr17	37435000	38350000	CDK12	NM_016507.4	chr17	37584997	37600537	chr17	37600899	37646162	214	341	413	0.825666	281.552	1	1
chr17	37435000	38350000	CDK12	NM_016507.4	chr17	37600899	37646162	chr17	37953913	37959829	3	341	413	0.825666	281.552	1	11
chr17	37435000	38350000	CDK12	NM_016507.4	chr17	37600899	37646162	chr17	37961166	37978649	13	341	413	0.825666	281.552	1	5
chr17	37435000	38350000	CDK12	NM_016507.4	chr17	37600899	37646162	chr17	38000098	38005687	5	341	413	0.825666	281.552	1	9
chr12	12020000	12210000	CDKN1B	NM_004064.5	chr12	12027085	12033230	chr12	12866703	12881004	3	17	654	0.0259939	0.441896	2	2
chr12	12020000	12210000	CDKN1B	NM_004064.5	chr12	12037482	12040026	chr12	12866703	12881004	5	17	654	0.0259939	0.441896	2	1
chr12	12020000	12210000	CDKN1B	NM_004064.5	chr12	12074664	12076067	chr12	12866703	12881004	3	17	654	0.0259939	0.441896	2	2
chr12	12020000	12210000	CDKN1B	NM_004064.5	chr12	12125117	12129630	chr12	12866703	12881004	3	17	654	0.0259939	0.441896	2	2
chr12	12020000	12210000	CDKN1B	NM_004064.5	chr12	12176644	12179414	chr12	12866703	12881004	3	17	654	0.0259939	0.441896	2	2
chr20	48930000	48970000	CEBPB	NM_001285878.1	chr20	48801562	48815725	chr20	48918338	48933197	21	59	471	0.125265	7.39066	1	1
chr20	48930000	48970000	CEBPB	NM_001285878.1	chr20	48801562	48815725	chr20	48937020	48940100	4	59	471	0.125265	7.39066	1	5
chr20	48930000	48970000	CEBPB	NM_001285878.1	chr20	48801562	48815725	chr20	48946296	48952726	12	59	471	0.125265	7.39066	1	3
chr20	48930000	48970000	CEBPB	NM_001285878.1	chr20	48801562	48815725	chr20	48954956	48965215	17	59	471	0.125265	7.39066	1	2
chr20	48930000	48970000	CEBPB	NM_001285878.1	chr20	48801562	48815725	chr20	48965474	48966531	5	59	471	0.125265	7.39066	1	4
chr20	48930000	48970000	CEBPB	NM_001285879.1	chr20	48801562	48815725	chr20	48918338	48933197	21	59	471	0.125265	7.39066	1	1
chr20	48930000	48970000	CEBPB	NM_001285879.1	chr20	48801562	48815725	chr20	48937020	48940100	4	59	471	0.125265	7.39066	1	5
chr20	48930000	48970000	CEBPB	NM_001285879.1	chr20	48801562	48815725	chr20	48946296	48952726	12	59	471	0.125265	7.39066	1	3
chr20	48930000	48970000	CEBPB	NM_001285879.1	chr20	48801562	48815725	chr20	48954956	48965215	17	59	471	0.125265	7.39066	1	2
chr20	48930000	48970000	CEBPB	NM_001285879.1	chr20	48801562	48815725	chr20	48965474	48966531	5	59	471	0.125265	7.39066	1	4
chr20	48930000	48970000	CEBPB	NM_005194.4	chr20	48801562	48815725	chr20	48918338	48933197	21	59	471	0.125265	7.39066	1	1
chr20	48930000	48970000	CEBPB	NM_005194.4	chr20	48801562	48815725	chr20	48937020	48940100	4	59	471	0.125265	7.39066	1	5
chr20	48930000	48970000	CEBPB	NM_005194.4	chr20	48801562	48815725	chr20	48946296	48952726	12	59	471	0.125265	7.39066	1	3
chr20	48930000	48970000	CEBPB	NM_005194.4	chr20	48801562	48815725	chr20	48954956	48965215	17	59	471	0.125265	7.39066	1	2
chr20	48930000	48970000	CEBPB	NM_005194.4	chr20	48801562	48815725	chr20	48965474	48966531	5	59	471	0.125265	7.39066	1	4
chr1	214715000	214750000	CENPF	NM_016343.4	chr1	214743089	214749509	chr1	214775756	214779175	11	11	43	0.255814	2.81395	2	1
chr17	79960000	80050000	CENPX	NM_001271006.2	chr17	79961252	79965209	chr17	79974517	79984693	24	75	475	0.157895	11.8421	2	1
chr17	79960000	80050000	CENPX	NM_001271006.2	chr17	79968355	79973184	chr17	79974517	79984693	19	75	475	0.157895	11.8421	2	2
chr17	79960000	80050000	CENPX	NM_001271006.2	chr17	79974517	79984693	chr17	79997087	79998524	19	75	475	0.157895	11.8421	2	2
chr17	79960000	80050000	CENPX	NM_001271006.2	chr17	79974517	79984693	chr17	80004619	80007196	13	75	475	0.157895	11.8421	2	3
chr17	79960000	80050000	CENPX	NM_001271007.2	chr17	79961252	79965209	chr17	79974517	79984693	24	75	475	0.157895	11.8421	2	1
chr17	79960000	80050000	CENPX	NM_001271007.2	chr17	79968355	79973184	chr17	79974517	79984693	19	75	475	0.157895	11.8421	2	2
chr17	79960000	80050000	CENPX	NM_001271007.2	chr17	79974517	79984693	chr17	79997087	79998524	19	75	475	0.157895	11.8421	2	2
chr17	79960000	80050000	CENPX	NM_001271007.2	chr17	79974517	79984693	chr17	80004619	80007196	13	75	475	0.157895	11.8421	2	3
chr17	79960000	80050000	CENPX	NM_001330536.2	chr17	79961252	79965209	chr17	79974517	79984693	24	75	475	0.157895	11.8421	2	1
chr17	79960000	80050000	CENPX	NM_001330536.2	chr17	79968355	79973184	chr17	79974517	79984693	19	75	475	0.157895	11.8421	2	2
chr17	79960000	80050000	CENPX	NM_001330536.2	chr17	79974517	79984693	chr17	79997087	79998524	19	75	475	0.157895	11.8421	2	2
chr17	79960000	80050000	CENPX	NM_001330536.2	chr17	79974517	79984693	chr17	80004619	80007196	13	75	475	0.157895	11.8421	2	3
chr17	79960000	80050000	CENPX	NM_144998.4	chr17	79961252	79965209	chr17	79974517	79984693	24	75	475	0.157895	11.8421	2	1
chr17	79960000	80050000	CENPX	NM_144998.4	chr17	79968355	79973184	chr17	79974517	79984693	19	75	475	0.157895	11.8421	2	2
chr17	79960000	80050000	CENPX	NM_144998.4	chr17	79974517	79984693	chr17	79997087	79998524	19	75	475	0.157895	11.8421	2	2
chr17	79960000	80050000	CENPX	NM_144998.4	chr17	79974517	79984693	chr17	80004619	80007196	13	75	475	0.157895	11.8421	2	3
chr11	65270000	65290000	CFL1	NM_005507.3	chr11	65263078	65280458	chr11	65623551	65629102	6	6	168	0.0357143	0.214286	16	1
chr15	64090000	64155000	CIAO2A	NM_001014812.3	chr15	64128512	64130224	chr15	64383455	64390305	4	11	189	0.0582011	0.640212	3	2
chr15	64090000	64155000	CIAO2A	NM_001014812.3	chr15	64147192	64151955	chr15	64383455	64390305	7	11	189	0.0582011	0.640212	3	1
chr15	64090000	64155000	CIAO2A	NM_001289108.2	chr15	64128512	64130224	chr15	64383455	64390305	4	11	189	0.0582011	0.640212	3	2
chr15	64090000	64155000	CIAO2A	NM_001289108.2	chr15	64147192	64151955	chr15	64383455	64390305	7	11	189	0.0582011	0.640212	3	1
chr15	64090000	64155000	CIAO2A	NM_032231.7	chr15	64128512	64130224	chr15	64383455	64390305	4	11	189	0.0582011	0.640212	3	2
chr15	64090000	64155000	CIAO2A	NM_032231.7	chr15	64147192	64151955	chr15	64383455	64390305	7	11	189	0.0582011	0.640212	3	1
chr17	37435000	38350000	CISD3	NM_001136498.2	chr17	36854689	36911674	chr17	37444457	37447451	3	25	1009	0.024777	0.619425	9	5
chr17	37435000	38350000	CISD3	NM_001136498.2	chr17	36854689	36911674	chr17	37470125	37473720	4	25	1009	0.024777	0.619425	9	4
chr17	37435000	38350000	CISD3	NM_001136498.2	chr17	36854689	36911674	chr17	37480780	37494777	5	25	1009	0.024777	0.619425	9	3
chr17	37435000	38350000	CISD3	NM_001136498.2	chr17	36854689	36911674	chr17	37584997	37600537	7	25	1009	0.024777	0.619425	9	1
chr17	37435000	38350000	CISD3	NM_001136498.2	chr17	36854689	36911674	chr17	37961166	37978649	6	25	1009	0.024777	0.619425	9	2
chr1	155040000	155155000	CKS1B	NM_001826.3	chr1	154941750	154949651	chr1	155040995	155042444	14	66	189	0.349206	23.0476	9	2
chr1	155040000	155155000	CKS1B	NM_001826.3	chr1	154941750	154949651	chr1	155044748	155046810	10	66	189	0.349206	23.0476	9	3
chr1	155040000	155155000	CKS1B	NM_001826.3	chr1	154941750	154949651	chr1	155063372	155068587	16	66	189	0.349206	23.0476	9	1
chr1	155040000	155155000	CKS1B	NM_001826.3	chr1	154941750	154949651	chr1	155077656	155078983	6	66	189	0.349206	23.0476	9	6
chr1	155040000	155155000	CKS1B	NM_001826.3	chr1	154941750	154949651	chr1	155088467	155094190	7	66	189	0.349206	23.0476	9	5
chr1	155040000	155155000	CKS1B	NM_001826.3	chr1	154941750	154949651	chr1	155130934	155132168	8	66	189	0.349206	23.0476	9	4
chr1	155040000	155155000	CKS1B	NM_001826.3	chr1	154941750	154949651	chr1	155138824	155141362	5	66	189	0.349206	23.0476	9	7
chr17	57855000	58625000	CLTC	NM_001288653.2	chr17	57693879	57703064	chr17	57852365	57856574	7	179	696	0.257184	46.0359	6	4
chr17	57855000	58625000	CLTC	NM_001288653.2	chr17	57693879	57703064	chr17	57884265	57887088	5	179	696	0.257184	46.0359	6	5
chr17	57855000	58625000	CLTC	NM_001288653.2	chr17	57693879	57703064	chr17	57888097	57890714	3	179	696	0.257184	46.0359	6	6
chr17	57855000	58625000	CLTC	NM_001288653.2	chr17	57693879	57703064	chr17	58113537	58117893	3	179	696	0.257184	46.0359	6	6
chr17	57855000	58625000	CLTC	NM_001288653.2	chr17	57693879	57703064	chr17	58167891	58171580	3	179	696	0.257184	46.0359	6	6
chr17	57855000	58625000	CLTC	NM_001288653.2	chr17	57693879	57703064	chr17	57859950	57872352	14	179	696	0.257184	46.0359	6	2
chr17	57855000	58625000	CLTC	NM_001288653.2	chr17	57693879	57703064	chr17	57877274	57882708	8	179	696	0.257184	46.0359	6	3
chr17	57855000	58625000	CLTC	NM_001288653.2	chr17	57693879	57703064	chr17	57898568	57951001	133	179	696	0.257184	46.0359	6	1
chr17	57855000	58625000	CLTC	NM_001288653.2	chr17	57693879	57703064	chr17	57991124	57992570	3	179	696	0.257184	46.0359	6	6
chr17	57855000	58625000	CLTC	NM_004859.4	chr17	57693879	57703064	chr17	57852365	57856574	7	179	696	0.257184	46.0359	6	4
chr17	57855000	58625000	CLTC	NM_004859.4	chr17	57693879	57703064	chr17	57884265	57887088	5	179	696	0.257184	46.0359	6	5
chr17	57855000	58625000	CLTC	NM_004859.4	chr17	57693879	57703064	chr17	57888097	57890714	3	179	696	0.257184	46.0359	6	6
chr17	57855000	58625000	CLTC	NM_004859.4	chr17	57693879	57703064	chr17	58113537	58117893	3	179	696	0.257184	46.0359	6	6
chr17	57855000	58625000	CLTC	NM_004859.4	chr17	57693879	57703064	chr17	58167891	58171580	3	179	696	0.257184	46.0359	6	6
chr17	57855000	58625000	CLTC	NM_004859.4	chr17	57693879	57703064	chr17	57859950	57872352	14	179	696	0.257184	46.0359	6	2
chr17	57855000	58625000	CLTC	NM_004859.4	chr17	57693879	57703064	chr17	57877274	57882708	8	179	696	0.257184	46.0359	6	3
chr17	57855000	58625000	CLTC	NM_004859.4	chr17	57693879	57703064	chr17	57898568	57951001	133	179	696	0.257184	46.0359	6	1
chr17	57855000	58625000	CLTC	NM_004859.4	chr17	57693879	57703064	chr17	57991124	57992570	3	179	696	0.257184	46.0359	6	6
chr1	234650000	234790000	COA6	NM_001012985.2	chr1	234506404	234510308	chr1	234673583	234681578	4	8	55	0.145455	1.16364	3	1
chr1	234650000	234790000	COA6	NM_001012985.2	chr1	234506404	234510308	chr1	234697800	234702532	4	8	55	0.145455	1.16364	3	1
chr1	234650000	234790000	COA6	NM_001206641.3	chr1	234506404	234510308	chr1	234673583	234681578	4	8	55	0.145455	1.16364	3	1
chr1	234650000	234790000	COA6	NM_001206641.3	chr1	234506404	234510308	chr1	234697800	234702532	4	8	55	0.145455	1.16364	3	1
chr1	234650000	234790000	COA6	NM_001301733.1	chr1	234506404	234510308	chr1	234673583	234681578	4	8	55	0.145455	1.16364	3	1
chr1	234650000	234790000	COA6	NM_001301733.1	chr1	234506404	234510308	chr1	234697800	234702532	4	8	55	0.145455	1.16364	3	1
chr1	235120000	235300000	COA6	NM_001012985.2	chr1	234506404	234510308	chr1	235264655	235269604	4	4	55	0.0727273	0.290909	6	1
chr1	235120000	235300000	COA6	NM_001206641.3	chr1	234506404	234510308	chr1	235264655	235269604	4	4	55	0.0727273	0.290909	6	1
chr1	235120000	235300000	COA6	NM_001301733.1	chr1	234506404	234510308	chr1	235264655	235269604	4	4	55	0.0727273	0.290909	6	1
chr11	61245000	61430000	CPSF7	NM_001136040.4	chr11	61195075	61198160	chr11	61393157	61396325	3	3	3	1	3	3	1
chr11	61245000	61430000	CPSF7	NM_001142565.3	chr11	61195075	61198160	chr11	61393157	61396325	3	3	3	1	3	3	1
chr11	61245000	61430000	CPSF7	NM_024811.4	chr11	61195075	61198160	chr11	61393157	61396325	3	3	3	1	3	3	1
chr1	1215000	1460000	CPTP	NM_001029885.2	chr1	1253011	1254726	chr1	1259028	1261427	32	45	45	1	45	3	1
chr1	1215000	1460000	CPTP	NM_001029885.2	chr1	1249198	1252080	chr1	1259028	1261427	13	45	45	1	45	3	2
chr14	105280000	105300000	CRIP1	NM_001311.5	chr14	105281064	105283703	chr14	105930233	105960170	5	9	493	0.0182556	0.1643	6	1
chr14	105280000	105300000	CRIP1	NM_001311.5	chr14	105285460	105288208	chr14	105930233	105960170	4	9	493	0.0182556	0.1643	6	2
chr14	105280000	105300000	CRIP2	NM_001270837.2	chr14	105281064	105283703	chr14	105930233	105960170	5	9	493	0.0182556	0.1643	6	1
chr14	105280000	105300000	CRIP2	NM_001270837.2	chr14	105285460	105288208	chr14	105930233	105960170	4	9	493	0.0182556	0.1643	6	2
chr14	105280000	105300000	CRIP2	NM_001270841.2	chr14	105285460	105288208	chr14	105930233	105960170	4	9	493	0.0182556	0.1643	6	2
chr14	105280000	105300000	CRIP2	NM_001270841.2	chr14	105281064	105283703	chr14	105930233	105960170	5	9	493	0.0182556	0.1643	6	1
chr14	105280000	105300000	CRIP2	NM_001312.4	chr14	105281064	105283703	chr14	105930233	105960170	5	9	493	0.0182556	0.1643	6	1
chr14	105280000	105300000	CRIP2	NM_001312.4	chr14	105285460	105288208	chr14	105930233	105960170	4	9	493	0.0182556	0.1643	6	2
chr17	37435000	38350000	CSF3	NM_000759.4	chr17	37584997	37600537	chr17	38124347	38202400	3	141	235	0.6	84.6	4	10
chr17	37435000	38350000	CSF3	NM_000759.4	chr17	37953913	37959829	chr17	38124347	38202400	8	141	235	0.6	84.6	4	6
chr17	37435000	38350000	CSF3	NM_000759.4	chr17	37961166	37978649	chr17	38124347	38202400	38	141	235	0.6	84.6	4	1
chr17	37435000	38350000	CSF3	NM_000759.4	chr17	37989543	37993425	chr17	38124347	38202400	7	141	235	0.6	84.6	4	7
chr17	37435000	38350000	CSF3	NM_000759.4	chr17	37994505	37998545	chr17	38124347	38202400	5	141	235	0.6	84.6	4	8
chr17	37435000	38350000	CSF3	NM_000759.4	chr17	38000098	38005687	chr17	38124347	38202400	8	141	235	0.6	84.6	4	6
chr17	37435000	38350000	CSF3	NM_000759.4	chr17	38008318	38009864	chr17	38124347	38202400	3	141	235	0.6	84.6	4	10
chr17	37435000	38350000	CSF3	NM_000759.4	chr17	38028177	38029904	chr17	38124347	38202400	3	141	235	0.6	84.6	4	10
chr17	37435000	38350000	CSF3	NM_000759.4	chr17	38046336	38047819	chr17	38124347	38202400	3	141	235	0.6	84.6	4	10
chr17	37435000	38350000	CSF3	NM_000759.4	chr17	38048211	38054361	chr17	38124347	38202400	14	141	235	0.6	84.6	4	4
chr17	37435000	38350000	CSF3	NM_000759.4	chr17	38124347	38202400	chr17	38202790	38203977	11	141	235	0.6	84.6	4	5
chr17	37435000	38350000	CSF3	NM_000759.4	chr17	38124347	38202400	chr17	38303073	38305366	4	141	235	0.6	84.6	4	9
chr17	37435000	38350000	CSF3	NM_000759.4	chr17	38124347	38202400	chr17	38306050	38315901	19	141	235	0.6	84.6	4	2
chr17	37435000	38350000	CSF3	NM_000759.4	chr17	38124347	38202400	chr17	38343925	38352420	15	141	235	0.6	84.6	4	3
chr17	37435000	38350000	CSF3	NM_001178147.2	chr17	37584997	37600537	chr17	38124347	38202400	3	141	235	0.6	84.6	4	10
chr17	37435000	38350000	CSF3	NM_001178147.2	chr17	37953913	37959829	chr17	38124347	38202400	8	141	235	0.6	84.6	4	6
chr17	37435000	38350000	CSF3	NM_001178147.2	chr17	37961166	37978649	chr17	38124347	38202400	38	141	235	0.6	84.6	4	1
chr17	37435000	38350000	CSF3	NM_001178147.2	chr17	37989543	37993425	chr17	38124347	38202400	7	141	235	0.6	84.6	4	7
chr17	37435000	38350000	CSF3	NM_001178147.2	chr17	37994505	37998545	chr17	38124347	38202400	5	141	235	0.6	84.6	4	8
chr17	37435000	38350000	CSF3	NM_001178147.2	chr17	38000098	38005687	chr17	38124347	38202400	8	141	235	0.6	84.6	4	6
chr17	37435000	38350000	CSF3	NM_001178147.2	chr17	38008318	38009864	chr17	38124347	38202400	3	141	235	0.6	84.6	4	10
chr17	37435000	38350000	CSF3	NM_001178147.2	chr17	38028177	38029904	chr17	38124347	38202400	3	141	235	0.6	84.6	4	10
chr17	37435000	38350000	CSF3	NM_001178147.2	chr17	38046336	38047819	chr17	38124347	38202400	3	141	235	0.6	84.6	4	10
chr17	37435000	38350000	CSF3	NM_001178147.2	chr17	38048211	38054361	chr17	38124347	38202400	14	141	235	0.6	84.6	4	4
chr17	37435000	38350000	CSF3	NM_001178147.2	chr17	38124347	38202400	chr17	38202790	38203977	11	141	235	0.6	84.6	4	5
chr17	37435000	38350000	CSF3	NM_001178147.2	chr17	38124347	38202400	chr17	38303073	38305366	4	141	235	0.6	84.6	4	9
chr17	37435000	38350000	CSF3	NM_001178147.2	chr17	38124347	38202400	chr17	38306050	38315901	19	141	235	0.6	84.6	4	2
chr17	37435000	38350000	CSF3	NM_001178147.2	chr17	38124347	38202400	chr17	38343925	38352420	15	141	235	0.6	84.6	4	3
chr17	37435000	38350000	CSF3	NM_172219.3	chr17	37584997	37600537	chr17	38124347	38202400	3	141	235	0.6	84.6	4	10
chr17	37435000	38350000	CSF3	NM_172219.3	chr17	37953913	37959829	chr17	38124347	38202400	8	141	235	0.6	84.6	4	6
chr17	37435000	38350000	CSF3	NM_172219.3	chr17	37961166	37978649	chr17	38124347	38202400	38	141	235	0.6	84.6	4	1
chr17	37435000	38350000	CSF3	NM_172219.3	chr17	37989543	37993425	chr17	38124347	38202400	7	141	235	0.6	84.6	4	7
chr17	37435000	38350000	CSF3	NM_172219.3	chr17	37994505	37998545	chr17	38124347	38202400	5	141	235	0.6	84.6	4	8
chr17	37435000	38350000	CSF3	NM_172219.3	chr17	38000098	38005687	chr17	38124347	38202400	8	141	235	0.6	84.6	4	6
chr17	37435000	38350000	CSF3	NM_172219.3	chr17	38008318	38009864	chr17	38124347	38202400	3	141	235	0.6	84.6	4	10
chr17	37435000	38350000	CSF3	NM_172219.3	chr17	38028177	38029904	chr17	38124347	38202400	3	141	235	0.6	84.6	4	10
chr17	37435000	38350000	CSF3	NM_172219.3	chr17	38046336	38047819	chr17	38124347	38202400	3	141	235	0.6	84.6	4	10
chr17	37435000	38350000	CSF3	NM_172219.3	chr17	38048211	38054361	chr17	38124347	38202400	14	141	235	0.6	84.6	4	4
chr17	37435000	38350000	CSF3	NM_172219.3	chr17	38124347	38202400	chr17	38202790	38203977	11	141	235	0.6	84.6	4	5
chr17	37435000	38350000	CSF3	NM_172219.3	chr17	38124347	38202400	chr17	38303073	38305366	4	141	235	0.6	84.6	4	9
chr17	37435000	38350000	CSF3	NM_172219.3	chr17	38124347	38202400	chr17	38306050	38315901	19	141	235	0.6	84.6	4	2
chr17	37435000	38350000	CSF3	NM_172219.3	chr17	38124347	38202400	chr17	38343925	38352420	15	141	235	0.6	84.6	4	3
chr17	37435000	38350000	CSF3	NM_172220.3	chr17	37584997	37600537	chr17	38124347	38202400	3	141	235	0.6	84.6	4	10
chr17	37435000	38350000	CSF3	NM_172220.3	chr17	37953913	37959829	chr17	38124347	38202400	8	141	235	0.6	84.6	4	6
chr17	37435000	38350000	CSF3	NM_172220.3	chr17	37961166	37978649	chr17	38124347	38202400	38	141	235	0.6	84.6	4	1
chr17	37435000	38350000	CSF3	NM_172220.3	chr17	37989543	37993425	chr17	38124347	38202400	7	141	235	0.6	84.6	4	7
chr17	37435000	38350000	CSF3	NM_172220.3	chr17	37994505	37998545	chr17	38124347	38202400	5	141	235	0.6	84.6	4	8
chr17	37435000	38350000	CSF3	NM_172220.3	chr17	38000098	38005687	chr17	38124347	38202400	8	141	235	0.6	84.6	4	6
chr17	37435000	38350000	CSF3	NM_172220.3	chr17	38008318	38009864	chr17	38124347	38202400	3	141	235	0.6	84.6	4	10
chr17	37435000	38350000	CSF3	NM_172220.3	chr17	38028177	38029904	chr17	38124347	38202400	3	141	235	0.6	84.6	4	10
chr17	37435000	38350000	CSF3	NM_172220.3	chr17	38046336	38047819	chr17	38124347	38202400	3	141	235	0.6	84.6	4	10
chr17	37435000	38350000	CSF3	NM_172220.3	chr17	38048211	38054361	chr17	38124347	38202400	14	141	235	0.6	84.6	4	4
chr17	37435000	38350000	CSF3	NM_172220.3	chr17	38124347	38202400	chr17	38202790	38203977	11	141	235	0.6	84.6	4	5
chr17	37435000	38350000	CSF3	NM_172220.3	chr17	38124347	38202400	chr17	38303073	38305366	4	141	235	0.6	84.6	4	9
chr17	37435000	38350000	CSF3	NM_172220.3	chr17	38124347	38202400	chr17	38306050	38315901	19	141	235	0.6	84.6	4	2
chr17	37435000	38350000	CSF3	NM_172220.3	chr17	38124347	38202400	chr17	38343925	38352420	15	141	235	0.6	84.6	4	3
chr17	56070000	56080000	CUEDC1	NM_001271875.2	chr17	56029340	56033423	chr17	56068169	56073621	13	13	500	0.026	0.338	6	3
chr17	56070000	56080000	CUEDC1	NM_001292025.2	chr17	55969977	55983921	chr17	56068169	56073621	55	82	1706	0.0480657	3.94138	4	1
chr17	56070000	56080000	CUEDC1	NM_001292025.2	chr17	55969977	55983921	chr17	56076457	56079204	27	82	1706	0.0480657	3.94138	4	2
chr17	57855000	58625000	CUEDC1	NM_001271875.2	chr17	56029340	56033423	chr17	57898568	57951001	5	5	500	0.01	0.05	19	2
chr17	57855000	58625000	CUEDC1	NM_001292025.2	chr17	55969977	55983921	chr17	57898568	57951001	14	14	1706	0.00820633	0.114889	16	1
chr2	38475000	38520000	CYP1B1	NM_000104.4	chr2	38301351	38305124	chr2	38491543	38492923	4	11	95	0.115789	1.27368	1	1
chr2	38475000	38520000	CYP1B1	NM_000104.4	chr2	38301351	38305124	chr2	38494507	38496602	4	11	95	0.115789	1.27368	1	1
chr2	38475000	38520000	CYP1B1	NM_000104.4	chr2	38301351	38305124	chr2	38500667	38502472	3	11	95	0.115789	1.27368	1	2
chr1	155040000	155155000	DAP3	NM_001199849.1	chr1	155088467	155094190	chr1	155656406	155661764	3	3	522	0.00574713	0.0172414	19	1
chr1	155040000	155155000	DAP3	NM_001199850.1	chr1	155088467	155094190	chr1	155656406	155661764	3	3	522	0.00574713	0.0172414	19	1
chr1	155040000	155155000	DAP3	NM_001199851.1	chr1	155088467	155094190	chr1	155656406	155661764	3	3	522	0.00574713	0.0172414	19	1
chr1	155040000	155155000	DAP3	NM_004632.4	chr1	155088467	155094190	chr1	155656406	155661764	3	3	522	0.00574713	0.0172414	19	1
chr1	155040000	155155000	DAP3	NM_033657.2	chr1	155088467	155094190	chr1	155656406	155661764	3	3	522	0.00574713	0.0172414	19	1
chr15	64090000	64155000	DAPK2	NM_001363730.2	chr15	64147192	64151955	chr15	64336574	64340284	3	3	3	1	3	2	1
chr15	64090000	64155000	DAPK2	NM_001384997.1	chr15	64147192	64151955	chr15	64336574	64340284	3	3	3	1	3	2	1
chr15	64090000	64155000	DAPK2	NM_001384998.1	chr15	64147192	64151955	chr15	64336574	64340284	3	3	3	1	3	2	1
chr15	64090000	64155000	DAPK2	NM_001384999.1	chr15	64147192	64151955	chr15	64336574	64340284	3	3	3	1	3	2	1
chr15	64090000	64155000	DAPK2	NM_001385000.1	chr15	64147192	64151955	chr15	64336574	64340284	3	3	3	1	3	2	1
chr15	64090000	64155000	DAPK2	NM_014326.5	chr15	64147192	64151955	chr15	64336574	64340284	3	3	3	1	3	2	1
chr2	136880000	137125000	DARS1	NM_001293312.1	chr2	136741922	136744617	chr2	136882027	136884258	3	13	47	0.276596	3.59574	1	2
chr2	136880000	137125000	DARS1	NM_001293312.1	chr2	136741922	136744617	chr2	136885741	136888313	3	13	47	0.276596	3.59574	1	2
chr2	136880000	137125000	DARS1	NM_001293312.1	chr2	136741922	136744617	chr2	136936603	136939330	4	13	47	0.276596	3.59574	1	1
chr2	136880000	137125000	DARS1	NM_001293312.1	chr2	136741922	136744617	chr2	137113825	137115097	3	13	47	0.276596	3.59574	1	2
chr2	136880000	137125000	DARS1	NM_001349.4	chr2	136741922	136744617	chr2	136882027	136884258	3	13	47	0.276596	3.59574	1	2
chr2	136880000	137125000	DARS1	NM_001349.4	chr2	136741922	136744617	chr2	136885741	136888313	3	13	47	0.276596	3.59574	1	2
chr2	136880000	137125000	DARS1	NM_001349.4	chr2	136741922	136744617	chr2	136936603	136939330	4	13	47	0.276596	3.59574	1	1
chr2	136880000	137125000	DARS1	NM_001349.4	chr2	136741922	136744617	chr2	137113825	137115097	3	13	47	0.276596	3.59574	1	2
chr17	79960000	80050000	DCXR	NM_001195218.1	chr17	79993381	79996248	chr17	80004619	80007196	12	12	70	0.171429	2.05714	5	1
chr17	79960000	80050000	DCXR	NM_016286.4	chr17	79993381	79996248	chr17	80004619	80007196	12	12	70	0.171429	2.05714	5	1
chr19	17315000	17350000	DDA1	NM_024050.6	chr19	17328182	17332218	chr19	17411524	17424386	7	22	478	0.0460251	1.01255	7	2
chr19	17315000	17350000	DDA1	NM_024050.6	chr19	17345318	17348456	chr19	17411524	17424386	15	22	478	0.0460251	1.01255	7	1
chr19	17395000	17455000	DDA1	NM_024050.6	chr19	17411524	17424386	chr19	17434812	17442518	68	374	478	0.782427	292.628	1	3
chr19	17395000	17455000	DDA1	NM_024050.6	chr19	17399998	17407884	chr19	17411524	17424386	173	374	478	0.782427	292.628	1	1
chr19	17395000	17455000	DDA1	NM_024050.6	chr19	17411524	17424386	chr19	17425652	17434402	133	374	478	0.782427	292.628	1	2
chr19	12960000	13275000	DDX39A	NM_005804.4	chr19	13142379	13151235	chr19	14526828	14531648	3	3	155	0.0193548	0.0580645	21	1
chr14	100590000	100655000	DEGS2	NM_206918.3	chr14	100603116	100624374	chr14	100624849	100627529	56	56	63	0.888889	49.7778	1	1
chr17	27430000	27540000	DHRS13	NM_144683.4	chr17	27227284	27236711	chr17	27470591	27488148	8	12	60	0.2	2.4	5	1
chr17	27430000	27540000	DHRS13	NM_144683.4	chr17	27227284	27236711	chr17	27441580	27456150	4	12	60	0.2	2.4	5	2
chr17	57855000	58625000	DHX40	NM_001166301.2	chr17	57641858	57644637	chr17	57898568	57951001	8	8	8	1	8	8	1
chr17	57855000	58625000	DHX40	NM_024612.5	chr17	57641858	57644637	chr17	57898568	57951001	8	8	8	1	8	8	1
chr14	50305000	50415000	DNAAF2	NM_001083908.2	chr14	50099702	50103641	chr14	50327194	50331213	9	13	105	0.12381	1.60952	5	1
chr14	50305000	50415000	DNAAF2	NM_001083908.2	chr14	50099702	50103641	chr14	50333438	50336409	4	13	105	0.12381	1.60952	5	2
chr14	50305000	50415000	DNAAF2	NM_001378453.1	chr14	50099702	50103641	chr14	50327194	50331213	9	13	105	0.12381	1.60952	5	1
chr14	50305000	50415000	DNAAF2	NM_001378453.1	chr14	50099702	50103641	chr14	50333438	50336409	4	13	105	0.12381	1.60952	5	2
chr14	50305000	50415000	DNAAF2	NM_018139.3	chr14	50099702	50103641	chr14	50327194	50331213	9	13	105	0.12381	1.60952	5	1
chr14	50305000	50415000	DNAAF2	NM_018139.3	chr14	50099702	50103641	chr14	50333438	50336409	4	13	105	0.12381	1.60952	5	2
chr19	12960000	13275000	DNAJB1	NM_001300914.2	chr19	13270927	13276769	chr19	14623499	14634673	5	5	512	0.00976562	0.0488281	22	1
chr19	12960000	13275000	DNAJB1	NM_006145.3	chr19	13270927	13276769	chr19	14623499	14634673	5	5	512	0.00976562	0.0488281	22	1
chr19	12960000	13275000	DNASE2	NM_001375.3	chr19	12975158	12980310	chr19	12988866	13002942	39	123	161	0.763975	93.9689	6	1
chr19	12960000	13275000	DNASE2	NM_001375.3	chr19	12980787	12982198	chr19	12988866	13002942	13	123	161	0.763975	93.9689	6	4
chr19	12960000	13275000	DNASE2	NM_001375.3	chr19	12982805	12986445	chr19	12988866	13002942	25	123	161	0.763975	93.9689	6	2
chr19	12960000	13275000	DNASE2	NM_001375.3	chr19	12988866	13002942	chr19	13003938	13005229	17	123	161	0.763975	93.9689	6	3
chr19	12960000	13275000	DNASE2	NM_001375.3	chr19	12988866	13002942	chr19	13018875	13020443	8	123	161	0.763975	93.9689	6	5
chr19	12960000	13275000	DNASE2	NM_001375.3	chr19	12988866	13002942	chr19	13074978	13079094	6	123	161	0.763975	93.9689	6	6
chr19	12960000	13275000	DNASE2	NM_001375.3	chr19	12988866	13002942	chr19	13160643	13177345	6	123	161	0.763975	93.9689	6	6
chr19	12960000	13275000	DNASE2	NM_001375.3	chr19	12988866	13002942	chr19	13181295	13191176	3	123	161	0.763975	93.9689	6	7
chr19	12960000	13275000	DNASE2	NM_001375.3	chr19	12988866	13002942	chr19	13270927	13276769	6	123	161	0.763975	93.9689	6	6
chr11	65270000	65290000	DPF2	NM_001330308.2	chr11	65100682	65101887	chr11	65263078	65280458	3	3	18	0.166667	0.5	12	1
chr11	65270000	65290000	DPF2	NM_006268.5	chr11	65100682	65101887	chr11	65263078	65280458	3	3	18	0.166667	0.5	12	1
chr1	155040000	155155000	DPM3	NM_018973.4	chr1	155040995	155042444	chr1	155111916	155114183	6	66	98	0.673469	44.449	8	4
chr1	155040000	155155000	DPM3	NM_018973.4	chr1	155063372	155068587	chr1	155111916	155114183	12	66	98	0.673469	44.449	8	3
chr1	155040000	155155000	DPM3	NM_018973.4	chr1	155088467	155094190	chr1	155111916	155114183	20	66	98	0.673469	44.449	8	1
chr1	155040000	155155000	DPM3	NM_018973.4	chr1	155111916	155114183	chr1	155130934	155132168	12	66	98	0.673469	44.449	8	3
chr1	155040000	155155000	DPM3	NM_018973.4	chr1	155111916	155114183	chr1	155138824	155141362	16	66	98	0.673469	44.449	8	2
chr1	155040000	155155000	DPM3	NM_153741.2	chr1	155040995	155042444	chr1	155111916	155114183	6	66	98	0.673469	44.449	8	4
chr1	155040000	155155000	DPM3	NM_153741.2	chr1	155063372	155068587	chr1	155111916	155114183	12	66	98	0.673469	44.449	8	3
chr1	155040000	155155000	DPM3	NM_153741.2	chr1	155088467	155094190	chr1	155111916	155114183	20	66	98	0.673469	44.449	8	1
chr1	155040000	155155000	DPM3	NM_153741.2	chr1	155111916	155114183	chr1	155130934	155132168	12	66	98	0.673469	44.449	8	3
chr1	155040000	155155000	DPM3	NM_153741.2	chr1	155111916	155114183	chr1	155138824	155141362	16	66	98	0.673469	44.449	8	2
chr1	1215000	1460000	DVL1	NM_001330311.2	chr1	1235267	1236742	chr1	1278119	1298111	8	75	84	0.892857	66.9643	2	2
chr1	1215000	1460000	DVL1	NM_001330311.2	chr1	1278119	1298111	chr1	1439603	1441558	3	75	84	0.892857	66.9643	2	3
chr1	1215000	1460000	DVL1	NM_001330311.2	chr1	1249198	1252080	chr1	1278119	1298111	8	75	84	0.892857	66.9643	2	2
chr1	1215000	1460000	DVL1	NM_001330311.2	chr1	1253011	1254726	chr1	1278119	1298111	8	75	84	0.892857	66.9643	2	2
chr1	1215000	1460000	DVL1	NM_001330311.2	chr1	1278119	1298111	chr1	1299220	1300367	48	75	84	0.892857	66.9643	2	1
chr1	1215000	1460000	DVL1	NM_004421.3	chr1	1235267	1236742	chr1	1278119	1298111	8	75	84	0.892857	66.9643	2	2
chr1	1215000	1460000	DVL1	NM_004421.3	chr1	1278119	1298111	chr1	1299220	1300367	48	75	84	0.892857	66.9643	2	1
chr1	1215000	1460000	DVL1	NM_004421.3	chr1	1278119	1298111	chr1	1439603	1441558	3	75	84	0.892857	66.9643	2	3
chr1	1215000	1460000	DVL1	NM_004421.3	chr1	1249198	1252080	chr1	1278119	1298111	8	75	84	0.892857	66.9643	2	2
chr1	1215000	1460000	DVL1	NM_004421.3	chr1	1253011	1254726	chr1	1278119	1298111	8	75	84	0.892857	66.9643	2	2
chr17	56070000	56080000	DYNLL2	NM_080677.3	chr17	56068169	56073621	chr17	56159116	56162741	12	12	25	0.48	5.76	3	1
chr20	32250000	32350000	E2F1	NM_005225.3	chr20	32272038	32275039	chr20	32301092	32302833	12	28	72	0.388889	10.8889	3	2
chr20	32250000	32350000	E2F1	NM_005225.3	chr20	32272038	32275039	chr20	32311863	32315583	16	28	72	0.388889	10.8889	3	1
chr3	172210000	172390000	ECT2	NM_001258315.2	chr3	172253981	172265393	chr3	172466642	172469759	4	4	17	0.235294	0.941176	3	1
chr3	172210000	172390000	ECT2	NM_001258316.2	chr3	172253981	172265393	chr3	172466642	172469759	4	4	17	0.235294	0.941176	3	1
chr3	172210000	172390000	ECT2	NM_001349094.2	chr3	172253981	172265393	chr3	172466642	172469759	4	4	17	0.235294	0.941176	3	1
chr3	172210000	172390000	ECT2	NM_001349095.2	chr3	172253981	172265393	chr3	172466642	172469759	4	4	17	0.235294	0.941176	3	1
chr3	172210000	172390000	ECT2	NM_001349096.2	chr3	172253981	172265393	chr3	172466642	172469759	4	4	17	0.235294	0.941176	3	1
chr3	172210000	172390000	ECT2	NM_001349097.2	chr3	172253981	172265393	chr3	172466642	172469759	4	4	17	0.235294	0.941176	3	1
chr3	172210000	172390000	ECT2	NM_001349098.2	chr3	172253981	172265393	chr3	172466642	172469759	4	4	17	0.235294	0.941176	3	1
chr3	172210000	172390000	ECT2	NM_001349099.2	chr3	172253981	172265393	chr3	172466642	172469759	4	4	17	0.235294	0.941176	3	1
chr3	172210000	172390000	ECT2	NM_001349100.2	chr3	172253981	172265393	chr3	172466642	172469759	4	4	17	0.235294	0.941176	3	1
chr3	172210000	172390000	ECT2	NM_001349101.2	chr3	172253981	172265393	chr3	172466642	172469759	4	4	17	0.235294	0.941176	3	1
chr3	172210000	172390000	ECT2	NM_001349102.2	chr3	172253981	172265393	chr3	172466642	172469759	4	4	17	0.235294	0.941176	3	1
chr3	172210000	172390000	ECT2	NM_001349103.2	chr3	172253981	172265393	chr3	172466642	172469759	4	4	17	0.235294	0.941176	3	1
chr3	172210000	172390000	ECT2	NM_001349104.2	chr3	172253981	172265393	chr3	172466642	172469759	4	4	17	0.235294	0.941176	3	1
chr3	172210000	172390000	ECT2	NM_018098.6	chr3	172253981	172265393	chr3	172466642	172469759	4	4	17	0.235294	0.941176	3	1
chr3	4735000	4805000	EDEM1	NM_014674.3	chr3	4750778	4767098	chr3	5227803	5231900	9	9	23	0.391304	3.52174	3	1
chr6	74065000	74310000	EEF1A1	NM_001402.6	chr6	74189857	74192398	chr6	74229665	74232058	9	110	113	0.973451	107.08	1	3
chr6	74065000	74310000	EEF1A1	NM_001402.6	chr6	74223271	74226108	chr6	74229665	74232058	66	110	113	0.973451	107.08	1	1
chr6	74065000	74310000	EEF1A1	NM_001402.6	chr6	74229665	74232058	chr6	74261040	74262494	10	110	113	0.973451	107.08	1	2
chr6	74065000	74310000	EEF1A1	NM_001402.6	chr6	74229665	74232058	chr6	74275242	74278602	7	110	113	0.973451	107.08	1	5
chr6	74065000	74310000	EEF1A1	NM_001402.6	chr6	74229665	74232058	chr6	74288145	74291619	10	110	113	0.973451	107.08	1	2
chr6	74065000	74310000	EEF1A1	NM_001402.6	chr6	74229665	74232058	chr6	74294931	74295958	8	110	113	0.973451	107.08	1	4
chr1	155040000	155155000	EFNA1	NM_004428.3	chr1	155040995	155042444	chr1	155095760	155104787	15	408	734	0.555858	226.79	2	7
chr1	155040000	155155000	EFNA1	NM_004428.3	chr1	155044748	155046810	chr1	155095760	155104787	19	408	734	0.555858	226.79	2	6
chr1	155040000	155155000	EFNA1	NM_004428.3	chr1	155063372	155068587	chr1	155095760	155104787	64	408	734	0.555858	226.79	2	2
chr1	155040000	155155000	EFNA1	NM_004428.3	chr1	155077656	155078983	chr1	155095760	155104787	33	408	734	0.555858	226.79	2	4
chr1	155040000	155155000	EFNA1	NM_004428.3	chr1	155088467	155094190	chr1	155095760	155104787	207	408	734	0.555858	226.79	2	1
chr1	155040000	155155000	EFNA1	NM_004428.3	chr1	155095760	155104787	chr1	155130934	155132168	24	408	734	0.555858	226.79	2	5
chr1	155040000	155155000	EFNA1	NM_004428.3	chr1	155095760	155104787	chr1	155138824	155141362	46	408	734	0.555858	226.79	2	3
chr1	155040000	155155000	EFNA1	NM_182685.2	chr1	155040995	155042444	chr1	155095760	155104787	15	408	734	0.555858	226.79	2	7
chr1	155040000	155155000	EFNA1	NM_182685.2	chr1	155044748	155046810	chr1	155095760	155104787	19	408	734	0.555858	226.79	2	6
chr1	155040000	155155000	EFNA1	NM_182685.2	chr1	155063372	155068587	chr1	155095760	155104787	64	408	734	0.555858	226.79	2	2
chr1	155040000	155155000	EFNA1	NM_182685.2	chr1	155077656	155078983	chr1	155095760	155104787	33	408	734	0.555858	226.79	2	4
chr1	155040000	155155000	EFNA1	NM_182685.2	chr1	155088467	155094190	chr1	155095760	155104787	207	408	734	0.555858	226.79	2	1
chr1	155040000	155155000	EFNA1	NM_182685.2	chr1	155095760	155104787	chr1	155130934	155132168	24	408	734	0.555858	226.79	2	5
chr1	155040000	155155000	EFNA1	NM_182685.2	chr1	155095760	155104787	chr1	155138824	155141362	46	408	734	0.555858	226.79	2	3
chr1	155040000	155155000	EFNA3	NM_004952.5	chr1	155040995	155042444	chr1	155047705	155062288	117	640	819	0.781441	500.122	1	3
chr1	155040000	155155000	EFNA3	NM_004952.5	chr1	155042920	155044329	chr1	155047705	155062288	60	640	819	0.781441	500.122	1	5
chr1	155040000	155155000	EFNA3	NM_004952.5	chr1	155044748	155046810	chr1	155047705	155062288	218	640	819	0.781441	500.122	1	1
chr1	155040000	155155000	EFNA3	NM_004952.5	chr1	155047705	155062288	chr1	155063372	155068587	121	640	819	0.781441	500.122	1	2
chr1	155040000	155155000	EFNA3	NM_004952.5	chr1	155047705	155062288	chr1	155077656	155078983	22	640	819	0.781441	500.122	1	7
chr1	155040000	155155000	EFNA3	NM_004952.5	chr1	155047705	155062288	chr1	155088467	155094190	61	640	819	0.781441	500.122	1	4
chr1	155040000	155155000	EFNA3	NM_004952.5	chr1	155047705	155062288	chr1	155130934	155132168	14	640	819	0.781441	500.122	1	8
chr1	155040000	155155000	EFNA3	NM_004952.5	chr1	155047705	155062288	chr1	155138824	155141362	27	640	819	0.781441	500.122	1	6
chr1	155040000	155155000	EFNA4	NM_005227.3	chr1	155032303	155038433	chr1	155040995	155042444	48	129	156	0.826923	106.673	5	2
[truncated: 3,767 more rows]

## Sheet: PRAD_LNCaP
Table S2e: RENC results from LNCaP cells
[truncated: 97 more rows]

[truncated: 5 more sheets: PRAD_VCaP, SKCM_M14, SqCC_BICR16, SqCC_BICR31, STAD_AGS]
