# Supplementary material for: Chromatin interaction maps identify oncogenic targets of enhancer duplications in cancer
Source: HighWire-hosted journal article supplement (doi:10.1101/gr.278418.123), 2024-10-01
Supplement: Supplemental_Table_S3.xlsx [file Supplemental_Table_S3.xlsx]

## Sheet: Sheet1
Table S3: Cell lines, tumor types, and their HiChIP/ChIP-seq data source
Cell lines	Tumor type	H3K27ac HiChIP data source	H3K27ac ChIPseq data source
AGS	Upper gastrointestinal cancer (stomach)	GSE240214	GSE88976
BICR16	Squamous cancer (head and neck)	GSE240214	GSE88976
BICR31	Squamous cancer (head and neck)	GSE240214	GSE88976
M14	Melanoma	GSE156773	ChIP-seq signal dervied from HiChIP reads
MCF-7	Breast cancer	GSE228247	GSE31755
ZR751	Breast cancer	GSE228247	GSE85158
VCaP	Prostate cancer	GSE228247	GSE105760
LNCaP	Prostate cancer	GSE227245	GSE73994
