# Supplementary material for: Chromatin interaction maps identify oncogenic targets of enhancer duplications in cancer
Source: HighWire-hosted journal article supplement (doi:10.1101/gr.278418.123), 2024-10-01
Supplement: Supplemental_Table_S4.xlsx [file Supplemental_Table_S4.xlsx]

## Sheet: Sheet1
Table S4: DNA oligos used in this study
sgRNAs
name	sequences	Targeting region (hg19)	Notes
NC1_F	CACCGATCGTTTCCGCTTAACGGCG	Non-targeting
NC1_R	AAACCGCCGTTAAGCGGAAACGATC
NC2_F	CACCGCTGAGTGAAAAATAAAAGTT	Non-targeting
NC2_R	AAACAACTTTTATTTTTCACTCAGC
ESR1_enh_sg_F	CACCGGGATGATGAAATATGCTAA	chr6:151979343-151979362
ESR1_enh_sg_R	AAACTTAGCATATTTCATCATCCC
VEGFA_enh_sg_F	CACCGTTTGAGGATGGTCCACGTG	chr6:43895024-43895043
VEGFA_enh_sg_R	AAACCACGTGGACCATCCTCAAAC
MYC_enh_sg_F	CACCGCACGGTTCCACCCCAACACG	chr8:130696056-130696075
MYC_enh_sg_R	AAACCGTGTTGGGGTGGAACCGTGC
GATA6_enh_sg_F	CACCGTTGTCTGTGGGAAGGGTGG	chr18:19774282-19774301
GATA6_enh_sg_R	AAACCCACCCTTCCCACAGACAAC
TP63_enh1_sg_F	CACCGAGGTTCCACAGTCTACCAC	chr3:188988228-188988247
TP63_enh1_sg_R	AAACGTGGTAGACTGTGGAACCTC
TP63_enh2_sg_F	CACCGATGTCAACATTTGTGGGCG	chr3:189561130-189561149
TP63_enh2_sg_R	AAACCGCCCACAAATGTTGACATC
TP63_enh3_sg_F	CACCGACAGAGTCAGGATTAGTGTA	chr3:189618548-189618567
TP63_enh3_sg_R	AAACTACACTAATCCTGACTCTGTC
IRF2BP2_enh_sg_F	CACCGCATGTGTAGTTACTTATCT	chr1:235096656-235096675
IRF2BP2_enh_sg_R	AAACAGATAAGTAACTACACATGC
longNET1_Prom_sg_F	CACCGAGGCAGAAAGCGCCTGTCAG	chr10:5454556-5454575
longNET1_Prom_sg_R	AAACCTGACAGGCGCTTTCTGCCTC
shortNET1_Prom_sg_F	CACCGGCAGCAAGCACCGACCCCA	chr10:5488542-5488561
shortNET1_Prom_sg_R	AAACTGGGGTCGGTGCTTGCTGCC
NET1_e1_sg1_F	CACCGAGGGCTTTGCAGGGGAAGAG	chr10:5587963-5587982
NET1_e1_sg1_R	AAACCTCTTCCCCTGCAAAGCCCTC
NET1_e1_sg2_F	CACCGAACAATTCTTGAGATTGAGT	chr10:5588007-5588026
NET1_e1_sg2_R	AAACACTCAATCTCAAGAATTGTTC
NET1_e2_sg1_F	CACCGTGTTTGTGCCTTGACTCAGC	chr10:5589143-5589162
NET1_e2_sg1_R	AAACGCTGAGTCAAGGCACAAACAC
NET1_e2_sg2_F	CACCGCCCTGCCCACACAAAGTCC	chr10:5588935-5588954
NET1_e2_sg2_R	AAACGGACTTTGTGTGGGCAGGGC
NET1_e3_sg1_F	CACCGCCCAAACACTCCAAGAACA	chr10:5590028-5590047	Also used for cutting the 1st STAT motif (STAT#1) in Figure 6
NET1_e3_sg1_R	AAACTGTTCTTGGAGTGTTTGGGC
NET1_e3_sg2_F	CACCGAGCTCTCTGTCCGGTTTGTT	chr10:5590193-5590212	Also used for cutting the RARA motif in Figure 6
NET1_e3_sg2_R	AAACAACAAACCGGACAGAGAGCTC
NET1_e4_sg1_F	CACCGTGAACTGGGAGCTGTGTATG	chr10:5591022-5591041
NET1_e4_sg1_R	AAACCATACACAGCTCCCAGTTCAC
NET1_e4_sg2_F	CACCGCATCGAGGGCGTAAACTCTG	chr10:5591054-5591073
NET1_e4_sg2_R	AAACCAGAGTTTACGCCCTCGATGC
NET1_e3_ETS_sg_F	CACCGACTCAGAGATGGGGGAGAGC	chr10:5589983-5590002
NET1_e3_ETS_sg_R	AAACGCTCTCCCCCATCTCTGAGTC
NET1_e3_SOX_sg_F	CACCGCACAAAAAGGCTCTTTGTTC	chr10:5590108-5590127
NET1_e3_SOX_sg_R	AAACGAACAAAGAGCCTTTTTGTGC
NET1_e3_STAT#2_sg_F	CACCGCTGCTTGGGTTTAGGCAAAC	chr10:5590233-5590252
NET1_e3_STAT#2_sg_R	AAACGTTTGCCTAAACCCAAGCAGC
NET1_e3_TCF7_sg_F	CACCGAGAGGTGGGCACAGAACAAA	chr10:5590343-5590362
NET1_e3_TCF7_sg_R	AAACTTTGTTCTGTGCCCACCTCTC
RT-qPCR primers
name	sequences	Notes
HPRT1_RT_F	GACCAGTCAACAGGGGACAT
HPRT1_RT_R	CCTGACCAAGGAAAGCAAAG
CTCF_RT_F	CCCACACCGGGGAGAAGCCT
CTCF_RT_R	CGCCATCTGGGCCAGCACAA
ESR1_RT_F	TCCAGCACCCTGAAGTCTCT
ESR1_RT_R	AGATGCTCCATGCCTTTGTT
VEGFA_RT_F	CCCACTGAGGAGTCCAACAT
VEGFA_RT_R	TGCATTCACATTTGTTGTGC
MYC_RT_F	GGCTCCTGGCAAAAGGTCA
MYC_RT_R	CTGCGTAGTTGTGCTGATGT
GATA6_RT_F	TTCCCATGACTCCAACTTCC
GATA6_RT_R	CGCCTATGTAGAGCCCATCT
TP63_RT_F	CTGGAAAACAATGCCCAGAC
TP63_RT_R	GAGGAGCCGTTCTGAATCTG
IRF2BP2_RT_F	GAGAGCAGGACTGGGTCAAC
IRF2BP2_RT_R	AGAGGGCTTCCTTTTCCTTG
longNET1_RT_F	GCCTTAGCAGCCTTGATCTG
shortNET1_RT_F	GTGGCACATGATGAGACTGG
NET1_RT_R	AAATTTGCCAAGGACGTGAC	the reverse primer for longNET1 is the same as shortNET1
CALML5_RT_F	GCTTTTGTGCTGGGACTCTC
CALML5_RT_R	CAAGGTCTGGAGGCAGAGAG
CALML3_RT_F	GCCAGGAAGATGAAGGACAC
CALML3_RT_R	CCTCGTCACTCAGCTTCTCC
FAM49B_RT_F	TTCTGCTTGAGGGTAATGGTG
FAM49B_RT_R	TTTAGCAAATGCTCCCACTG
ARMT1_RT_F	AGCACCTTTTCATCCCCAGA
ARMT1_RT_R	CCAAAACAGTGTAGTGGGGC
CLDN1_RT_F	CCCTATGACCCCAGTCAATG
CLDN1_RT_R	AAGGCAGAGAGAAGCAGCAG
TARBP1_RT_F	CCATCATTGGAGTGGAACAA
TARBP1_RT_R	GACATTCAGGGAGCGGATAA
ESCO1_RT_F	GGCACACCTAGGCTGTTAAC
ESCO1_RT_R	AGCAGATACCGAGTCATCCA
MAD2L1BP_RT_F	CATGTGGCTGTGACTGTGAC
MAD2L1BP_RT_R	TAGAAATGCCTGACCCAGCA
ChIP-qPCR primers
name	sequences	PCR-amplified regions (hg19)
NR1_ChIP_F	GCTGCTTTAGTGGCTGTTCC	chr11:112964712-112964844
NR1_ChIP_R	GCAGCTGCCGTCTTAACTGT
NR2_ChIP_F	AACCTCGCTATGCTCCCTTC	chr22:29083218-29083317
NR2_ChIP_R	CAGGTTTCCCAGGATGTCAC
NET1_e1_ChIP_F	CTTGAGTCTCTCCCTGGGTG	chr10:5588042-5588122
NET1_e1_ChIP_R	CTCTCGGATATGCTGCTGGT
NET1_e2_ChIP_F	ATGTTCACAACGTCACCTGC	chr10:5589125-5589203
NET1_e2_ChIP_R	CAGTTCTCTCCTTTGGCAGC
NET1_e3_ChIP_F	AGCTCTCTGTCCGGTTTGTT	chr10:5590193-5590302
NET1_e3_ChIP_R	GAAAGTCTCCCAGAAAGCGC
NET1_e4_ChIP_F	ACAGGGAGATAACGCACACA	chr10:5590955-5591036
NET1_e4_ChIP_R	TGGGAGCTGTGTATGAGGTG
